# Supplementary material for: Transition-metal free, radical oxidation of 1,6-enyne cyclopropanation: synthesis of aza-bicyclo[4.1.0]heptane derivatives
Source: Royal Society of Chemistry journal article supplement (doi:10.1039/d4cc02639j), 2024-01-01
Supplement: d4cc02639j1.pdf [file d4cc02639j1.pdf]

## Supporting Information

### Transition-Metal Free, Radical Oxidation of 1,6-Enyne Cyclopropanation: Synthesis of aza-bicyclo[4.1.0]heptane Derivatives

Shivam A. Meena<sup>‡a</sup>, Deepika Thakur<sup>‡a</sup>, Abhijit Nandy<sup>c</sup>, Rahul Ranjan<sup>d</sup>, Anubhav Rai<sup>e</sup>,  
Shibdas Banerjee<sup>e\*</sup> and Akhilesh K. Verma<sup>ab\*</sup>

Email: [averma@acbr.du.ac.in](mailto:averma@acbr.du.ac.in)

<sup>a</sup>Department of Chemistry, University of Delhi, Delhi-110007

<sup>b</sup>Institution of Eminence (IoE), University of Delhi, Delhi-110007

<sup>c</sup>Department of Chemistry, IISER Tirupati, Tirupati -517507

<sup>d</sup>Department of Chemistry, NSUT Delhi, Delhi-110078

<sup>e</sup>Department of Chemistry, IIT(ISM) Dhanbad, Jharkhand 826004

#### Table of Contents

|                                                                                                 |           |
|-------------------------------------------------------------------------------------------------|-----------|
| 1. General Information.....                                                                     | S3        |
| 2. Reaction optimization .....                                                                  | S4-S5     |
| 3. Real time mass monitoring studies.....                                                       | S5-S11    |
| 4. X-Ray Crystallographic Data of 2a, 2j and 4i.....                                            | S12-S16   |
| 5. Synthesis of Substrates 1.....                                                               | S17-S20   |
| 6. General procedure for the Synthesis of bicyclo[4.1.0]heptane .....                           | S20       |
| 7. General procedure for post functionalization of products.....                                | S21       |
| 8. Characterization Data of the Products 1, 2, 3, 5.....                                        | S22-S54   |
| 9. Copies of <sup>1</sup> H NMR, <sup>13</sup> C NMR, <sup>19</sup> F NMR and Mass Spectra..... | S55-S253  |
| 10. Isotopic study.....                                                                         | S254-S255 |

**11. Intermediate Adduct Data.....S256-S259**

**12. References.....S259**

## (1) General Information.

All reagents were purchased (unless specified) at highest commercial quality and used as received. Reaction mixtures were stirred magnetically. All require temperature for reactions were achieved using a IKA heating plate and oil bath.

**Rf:** LC analysis was performed on commercially prepared 60 F<sub>254</sub> silica gel plates and visualized by either UV irradiation or by staining with I<sub>2</sub>. Column chromatography was performed using 100- 200 mesh silica gel.

**Melting Point:** Melting points were measured on a Kofler hot-stage melting point apparatus and are uncorrected.

**<sup>1</sup>H NMR:** Spectra were recorded on JEOL ECS (400 MHz) instruments. Chemical shifts ( $\delta$  H) are quoted in parts per million (ppm) was used. Spin-spin coupling constants (*J*) are reported in Hertz (Hz).

**<sup>13</sup>C NMR:** Spectra were recorded on JEOL ECS (100 MHz) instruments. Chemical shifts ( $\delta$  C) are quoted in parts per million (ppm) and referenced to the appropriate solvent peak(s). Spin-spin coupling constants (*J*) are reported in Hertz (Hz).

**HRMS:** High resolution mass spectra were recorded on an Agilent 6500 series B5125 mass spectrometer (ESI-TOF).

## (2) Reaction Optimization

We commenced our investigation by employing *N*-(3-phenylpropioloyl)-*N*-(*p*-tolyl)methacrylamide **1a** as a model substrate. The reaction of **1a** in the presence of I<sub>2</sub>, TBHP as an oxidant, and MeCN as a solvent gave the product **2a** in 75% yield (Table 1, entry 1). When PIDA was used product **2a** was observed in 65% yield, however, the use of *N*-iodosuccinimide (NIS) gave a 60% yield of **2a** (Table 1, entry 2-3) which shows that molecular iodine was the best iodine source for this conversion.

The use of other oxidants, DTBP and K<sub>2</sub>S<sub>2</sub>O<sub>8</sub> provided the desired product **2a** in 40 and 10% yields (entries 4-5). When the reaction was performed under an N<sub>2</sub> atmosphere (entry 6) product **2a** was obtained in 75% yield. This concluded that TBHP was the optimal oxidant for the reaction. Product **2a** was formed in 60% yield when the reaction was conducted in H<sub>2</sub>O as solvent. The use of other solvents like dioxane, toluene, THF, and DMSO, was found inferior/unsuitable for the reaction (entries 8-11).

When the reaction was performed without iodine, we did not observe the desired product **2a** (entry 12). Also, the reaction did not proceed without the oxidant TBHP (entry 13). These observations indicate that both iodine and TBHP were necessary for the reaction. The yield of the product was further enhanced when a mixture of H<sub>2</sub>O: MeCN (9:1) was used (entry 14). Subsequent adjustments in the reaction temperature revealed that deviations from the optimal temperature adversely affected the yield of product **2a**. Reduction to 40 °C and 60 °C resulted in the product **2a** in 50% and 60% yield, respectively. An increase in temperature to 100 °C and 120 °C proved to be unfavorable, leading to decreased yields of **2a** in 30% and 25%, respectively.

**Table S1.** Optimization of Reaction Conditions<sup>a</sup>

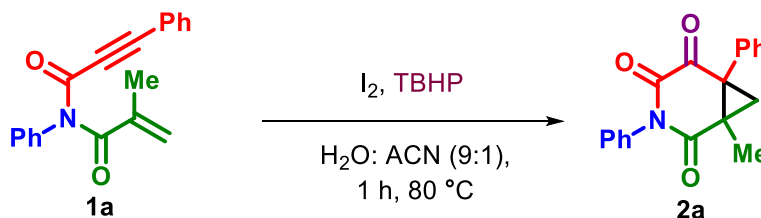

| Entry | I <sub>2</sub> Source (0.5 equiv.) | Oxidant equiv.) (3.0                         | Solvent          | Yield <sup>b</sup> <b>2a</b> (%) |
|-------|------------------------------------|----------------------------------------------|------------------|----------------------------------|
| 1     | I <sub>2</sub>                     | TBHP                                         | ACN              | 75                               |
| 2     | PIDA                               | TBHP                                         | ACN              | 65                               |
| 3     | NIS                                | TBHP                                         | ACN              | 60                               |
| 4     | I <sub>2</sub>                     | DTBP                                         | ACN              | 40                               |
| 5     | I <sub>2</sub>                     | K <sub>2</sub> S <sub>2</sub> O <sub>8</sub> | ACN              | 10                               |
| 6     | I <sub>2</sub>                     | TBHP                                         | ACN              | 75 <sup>c</sup>                  |
| 7     | I <sub>2</sub>                     | TBHP                                         | H <sub>2</sub> O | 60                               |
| 8     | I <sub>2</sub>                     | TBHP                                         | Dioxane          | 0                                |
| 9     | I <sub>2</sub>                     | TBHP                                         | Toluene          | 20                               |

|    |                |      |                               |                                                                       |
|----|----------------|------|-------------------------------|-----------------------------------------------------------------------|
| 10 | I <sub>2</sub> | TBHP | THF                           | 40                                                                    |
| 11 | I <sub>2</sub> | TBHP | DMSO                          | 0                                                                     |
| 12 |                | TBHP | ACN                           | 0                                                                     |
| 13 | I <sub>2</sub> |      | ACN                           | 0                                                                     |
| 14 | I <sub>2</sub> | TBHP | H <sub>2</sub> O:ACN<br>(9:1) | 85 <sup>d</sup>                                                       |
| 15 | I <sub>2</sub> | TBHP | H <sub>2</sub> O:ACN<br>(1:1) | 80                                                                    |
| 16 | I <sub>2</sub> | TBHP | H <sub>2</sub> O:ACN<br>(9:1) | 50 <sup>e</sup> , 60 <sup>f</sup> , 30 <sup>g</sup> , 25 <sup>h</sup> |

<sup>a</sup>Reaction Conditions: **1a** (0.346 mmol, 1.0 equiv.), Iodine (0.173 mmol, 0.5 equiv.), Oxidant (1.038 mmol, 3.0 equiv.) in a solvent at 80 °C for 1 h under an air atmosphere. <sup>b</sup>Isolated yield, <sup>c</sup>N<sub>2</sub> atmosphere, <sup>d</sup>ACN was added to increase the solubility of the substrates, <sup>e</sup>40 °C, <sup>f</sup>60 °C, <sup>g</sup>100 °C, <sup>h</sup>120 °C.

### (3) Real time mass monitoring studies:

#### (3.1) Experimental Section

All chemicals were obtained from commercial sources. LC-MS grade solvents were obtained from Thermo Fisher Scientific for online ESI-MS Study. The online ESI-MS study for real-time detection of reactive intermediates was performed using a custom-built pressurized sample infusion method, originally described by McIndoe and coworkers.<sup>1</sup> The experimental setup diagram is presented in the upper panel of Figure 2. Briefly, the reaction in a Schlenk flask was performed at a 0.346 mmol scale (containing **1a**) in 2 mL (9: 1) of solvent (H<sub>2</sub>O: ACN) at 80 °C. The reaction flask was pressurized by nitrogen gas with a backpressure of 4 psi for transferring the reaction mixture through a borosilicate capillary to a T-junction, where it was mixed with acetonitrile delivered by a Hamilton syringe (30 μL/min flow) connected to a high voltage (+5 kV) DC power source. The diluted reaction mixture from the T-junction was transferred to a custom-made electrospray source for spraying it to a high-resolution mass spectrometer (Orbitrap Exploris 120, Thermo Fisher Scientific). An inner fused silica capillary (100 μm i.d. and 360 μm o.d.) was utilized for solvent delivery, and an outer (coaxial) stainless steel capillary (0.5 mm i.d. and 1.6 mm o.d.) was employed for the nitrogen sheath gas supply (at 110 psi back pressure) in the customized spray source. To improve nebulization through the spray nozzle, the inner silica capillary tip was placed 1 mm outside the coaxial stainless steel capillary orifice. The stream of charged microdroplets from the spray nozzle was directed to the MS inlet capillary (300 oC), which caused the desolvation of the analyte ions for mass spectrometric detection. The maximum ion injection period with a single microscan was set to 500 ms, and the distance between the spray tip and the MS inlet was maintained at 15 mm. The mass resolution was set to 120,000. In order to obtain the highest ion current, other ion optics were further tuned. Thermo Fisher Scientific's XCalibur software was used for data acquisition.

The dead time (time taken by the reaction mixture to travel from the reaction vial to the electrospray nozzle) is approximately 45 seconds and does not account for the onset of the reaction seen in Figure 2. The extracted ion chromatogram of all the detected species (Figures 2a-h) is normalized to 1 as there is no cross-correlation between species for comparing their concentrations with ion signal intensities because of their differences in ionization efficiencies in the gas phase.

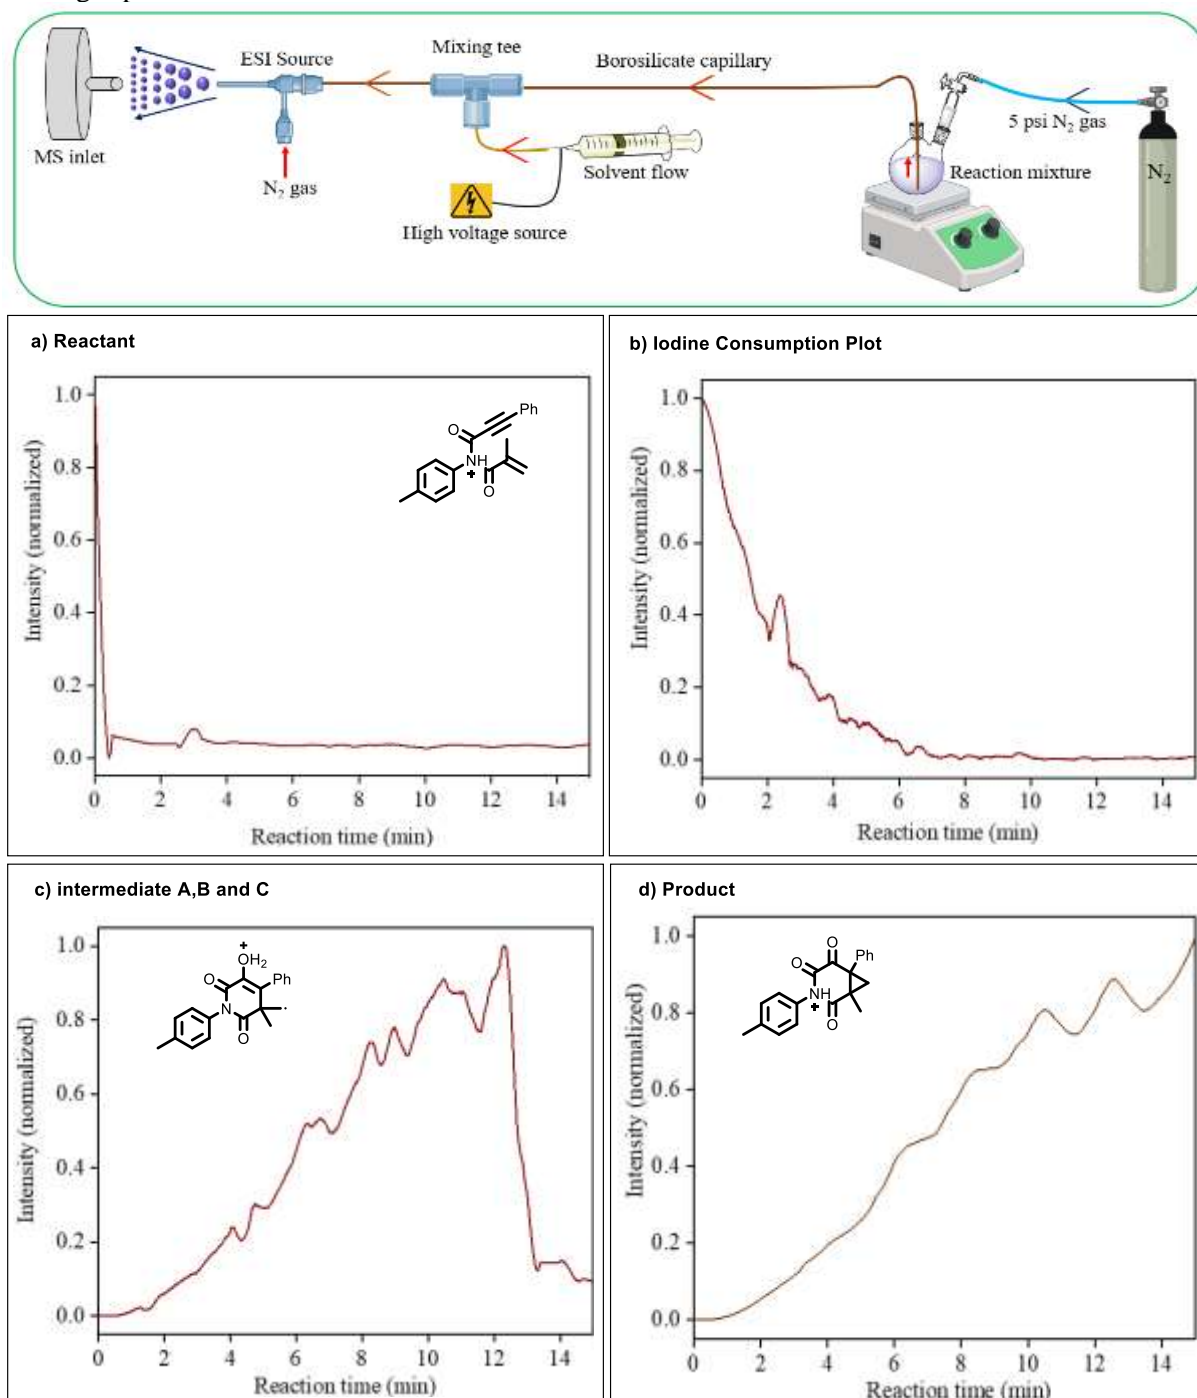

**Figure S1.** Custom-built online ESI-MS setup (upper panel) for real-time monitoring of the abundance of reactants, intermediates, and products in the positive ion mode during the progress of the reaction. All species are characterized by high mass accuracy, resolution, and isotopic distribution pattern (Figure S1).

### (3.2) Reaction Setup

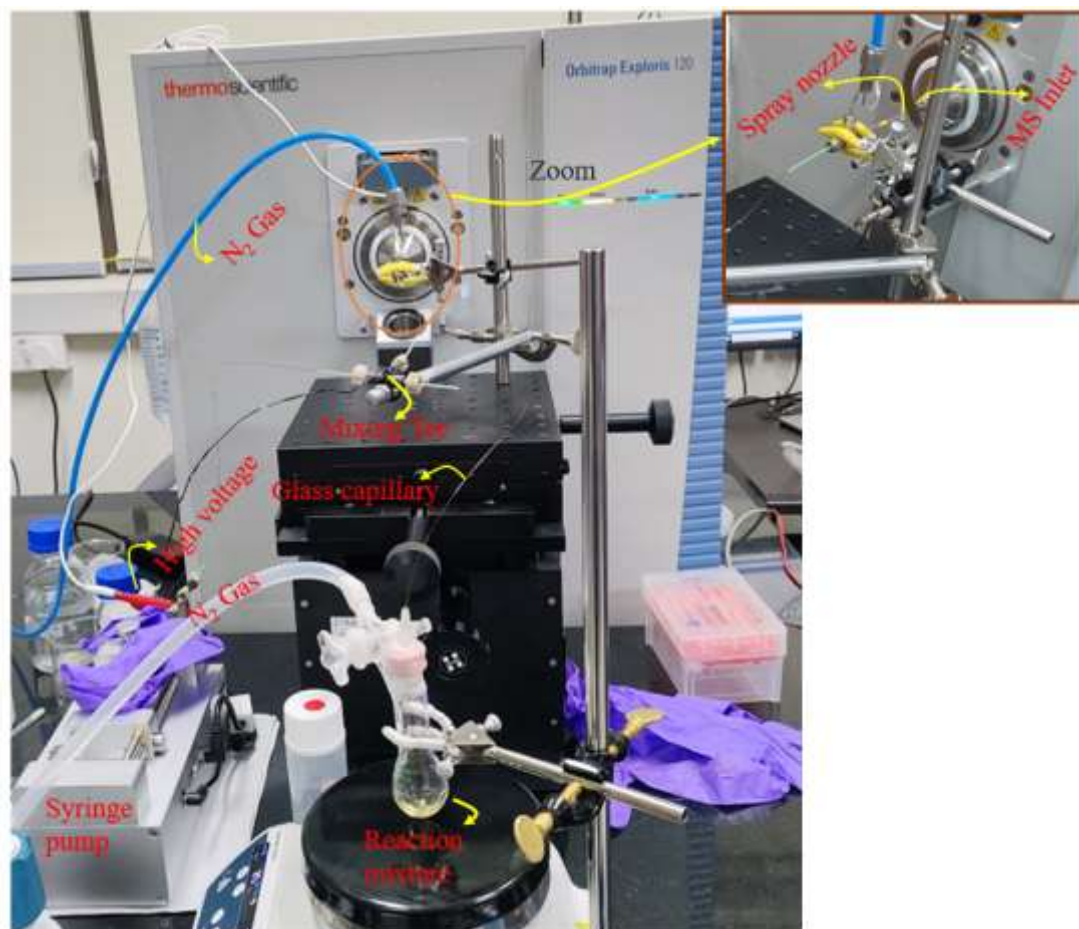

**Figure S2:** Online ESI-MS with pressurized sample infusion setup used monitoring to track different species S4 MS with pressurized sample infusion setup used for real monitoring to track different species formed during the progress of the reaction.

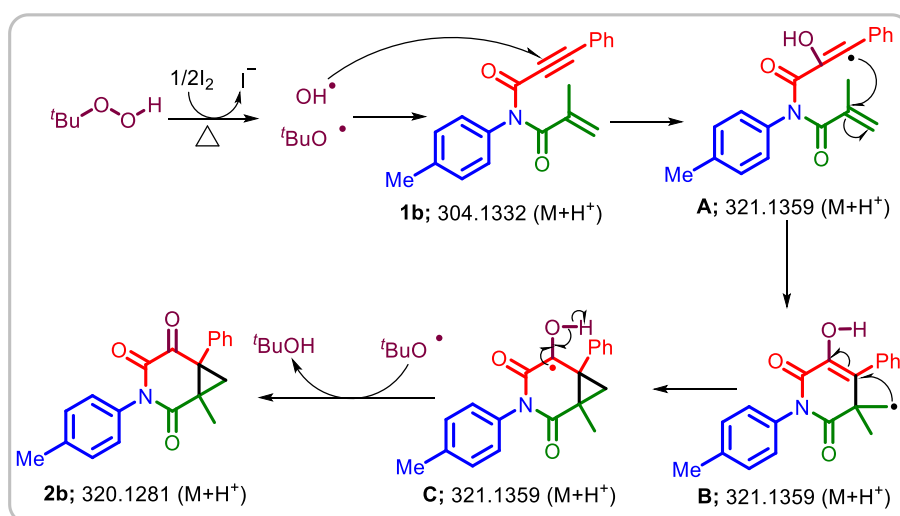

(a) Chronogram showing the consumption of 1

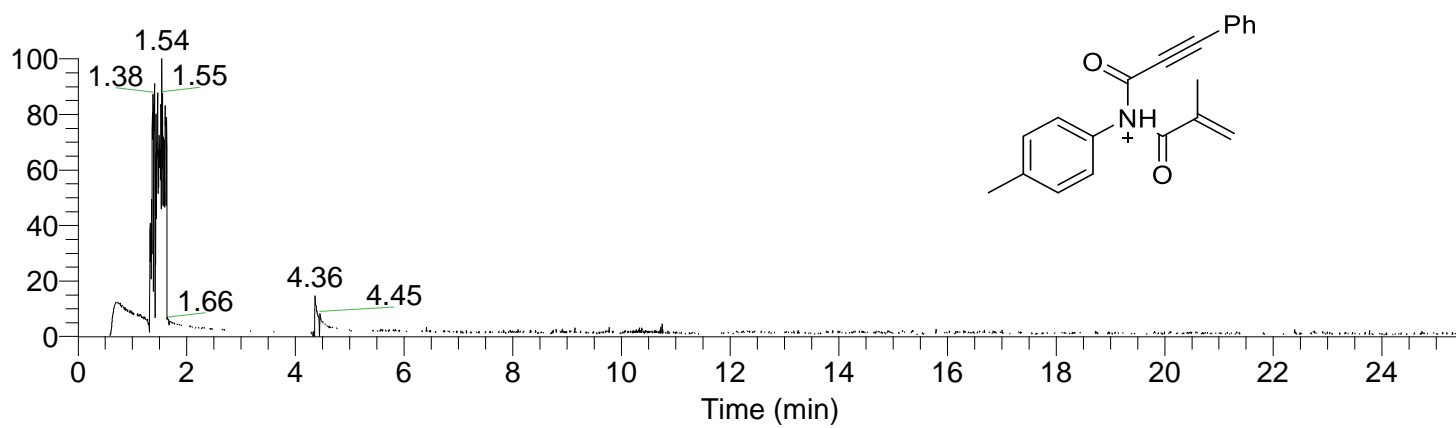

MS Data

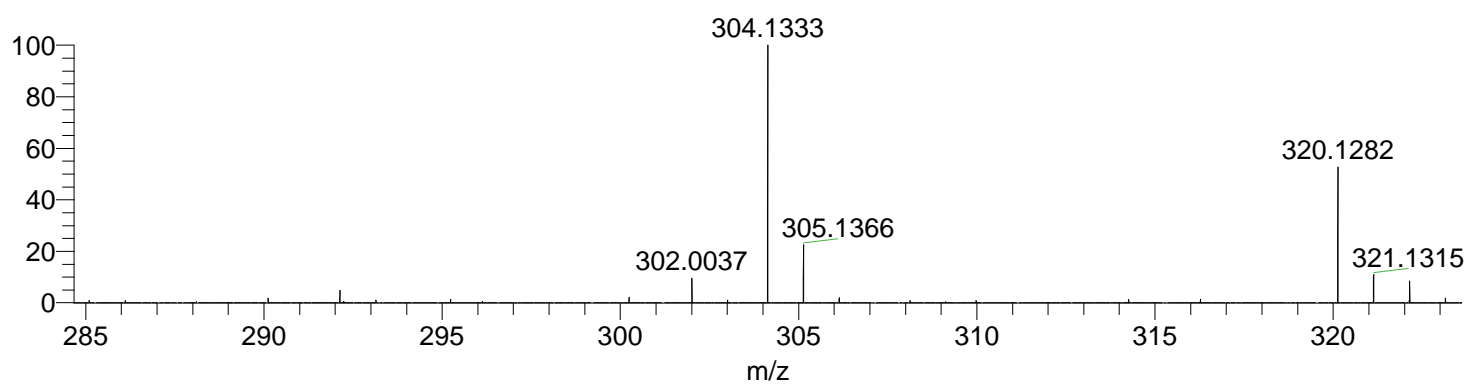



(b) Chronogram showing the consumption of Iodine

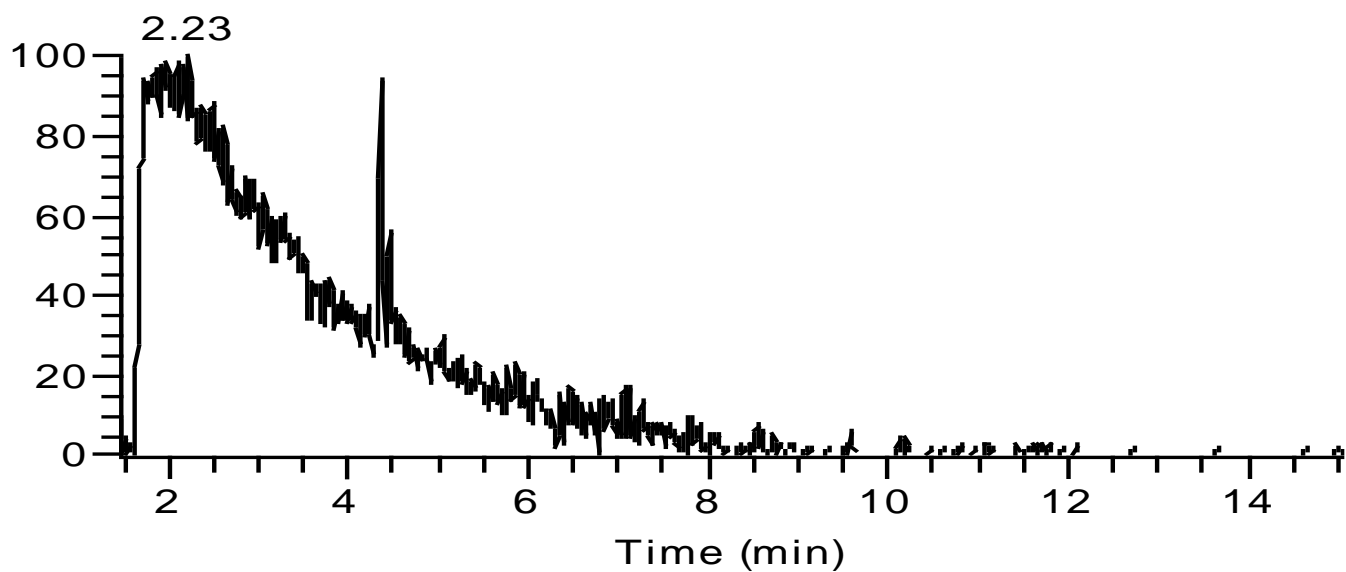

MS Data

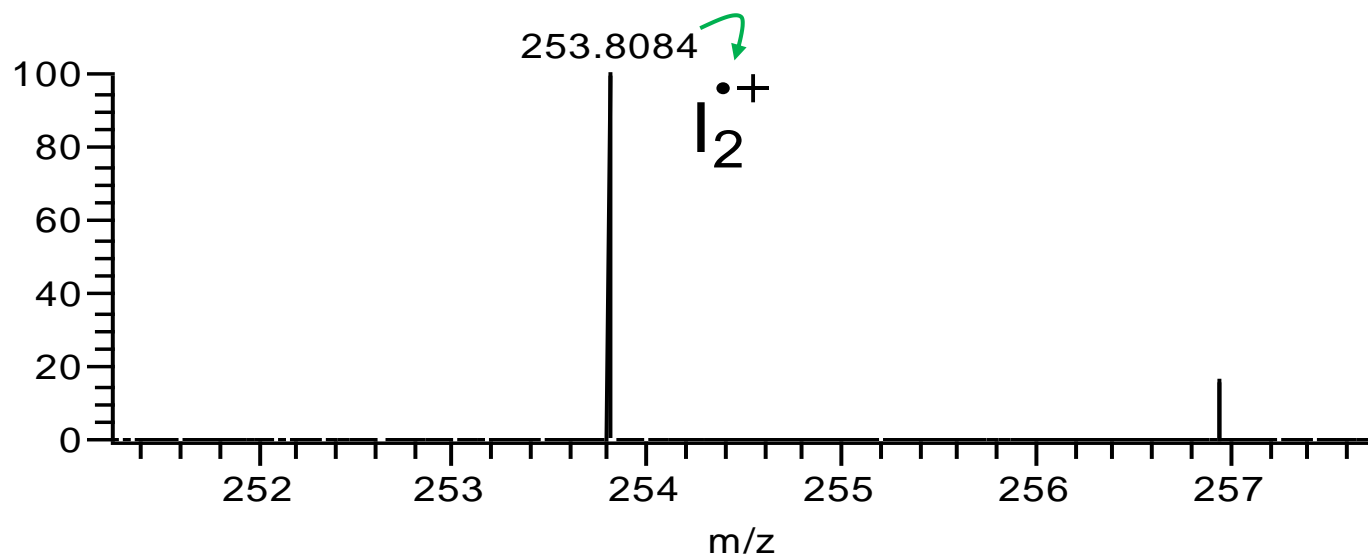

(c) Chronogram showing the formation of intermediates A, B and C

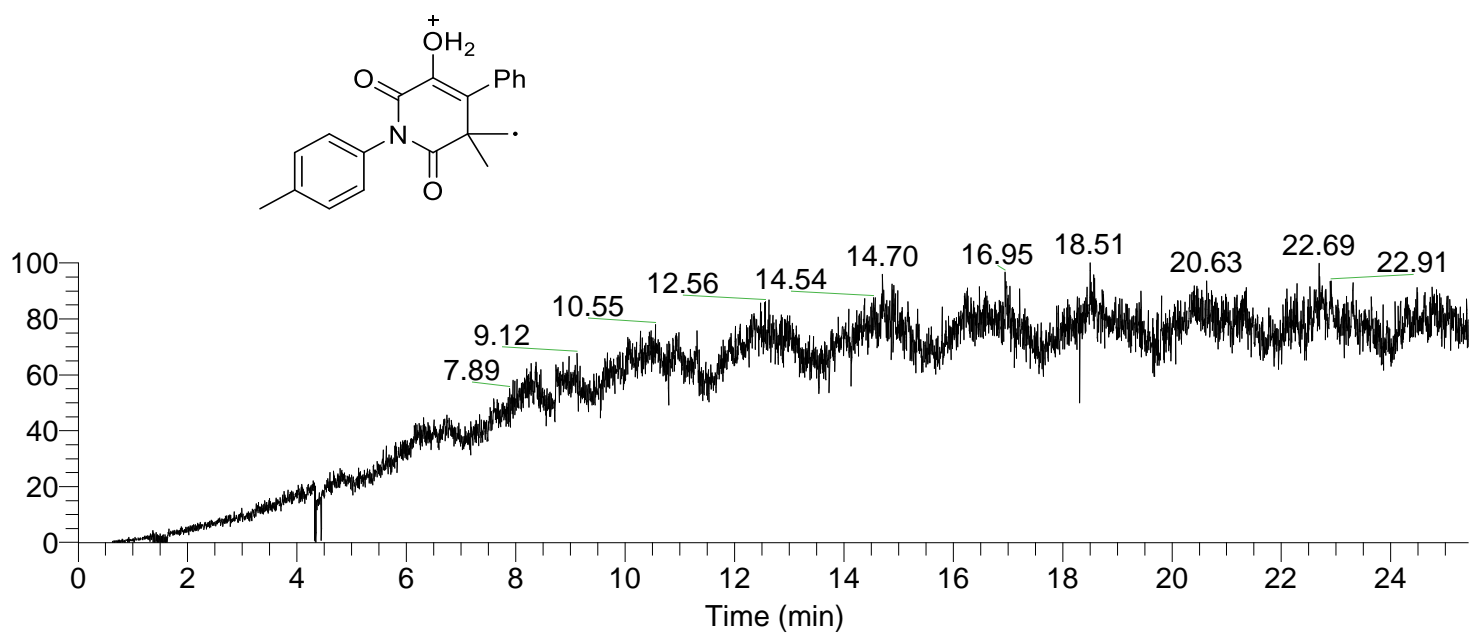

### MS Data

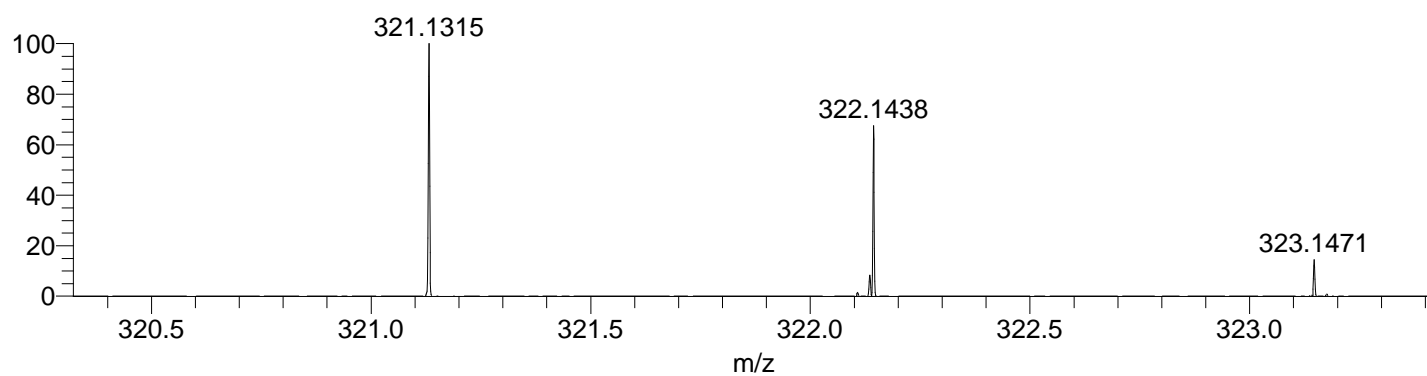

**(d) Chronogram showing the formation of 2**

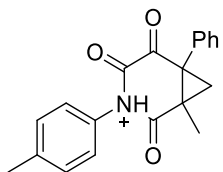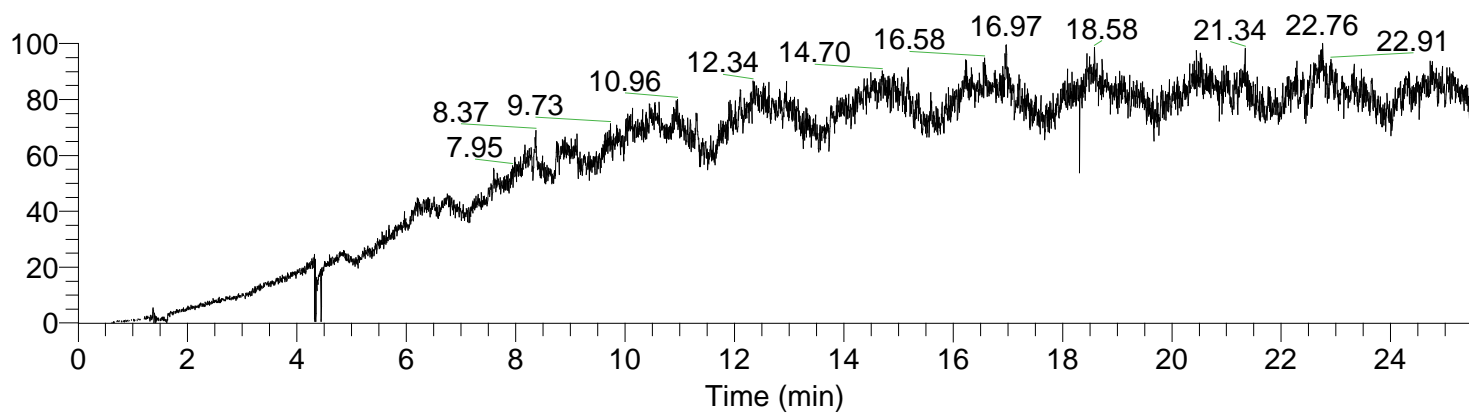

**MS Data**

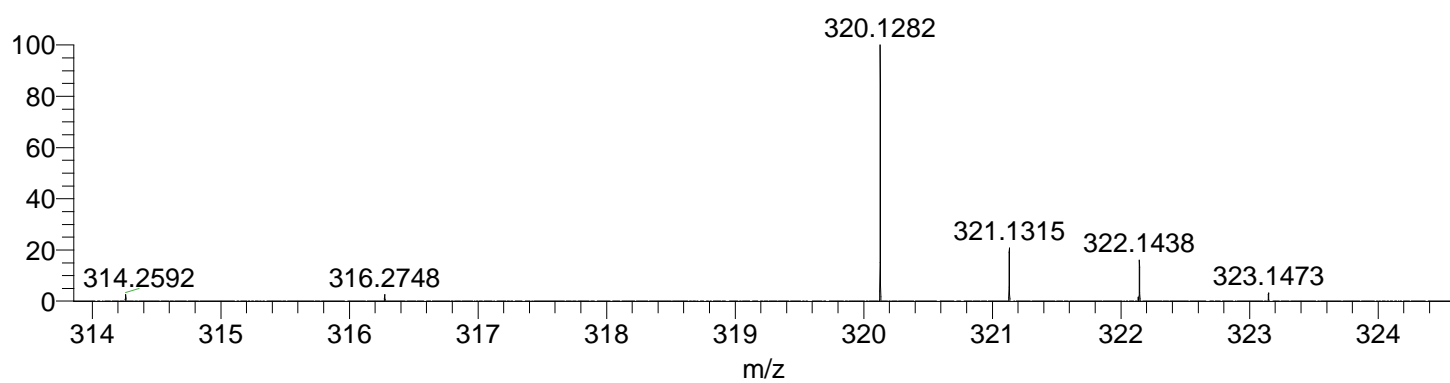

#### (4) X-Ray Crystallographic Data of 2a, 2j and 4j:

Data Collection and Refinement Single-crystal X-ray data of compounds was collected on Bruker SMART CCD Diffractometer using graphite monochromated MoK $\alpha$  radiation ( $\lambda = 0.71073 \text{ \AA}$ ). Frames were collected at  $T = 302 \text{ K}$  by  $\omega$ ,  $\phi$ , and  $2\theta$ -rotations with full quadrant data collection strategy (four domains each with 600 frames) at 10s per frame with SMART. The measured intensities were reduced to  $F^2$  and corrected for absorption with SADABS.<sup>11</sup> Structure solution, refinement, and data output were carried out with the SHELXTL package by direct methods.<sup>12</sup> Non-hydrogen atoms were refined anisotropically using the WinGX (version 1.80.05) program package.<sup>13</sup> All non-hydrogen atoms were refined anisotropically and hydrogen atoms were treated as riding atoms using SHELX default parameters. Molecular structures have drawn using ORTEP software shown in figure S2, S3 and S4. Further information on the crystal structure determination (excluding structure factors) has been given as table S1, S2 and S3 and also deposited in the Cambridge Crystallographic Data Centre as supplementary publications number 1587648. Copies of the data can be obtained free of charge upon application to CCDC, 12 Union Road, Cambridge CB2 1EZ, UK (fax: (+44) 1223-336-033. e-mail: deposit@ccdc.cam.ac.uk) or via internet.

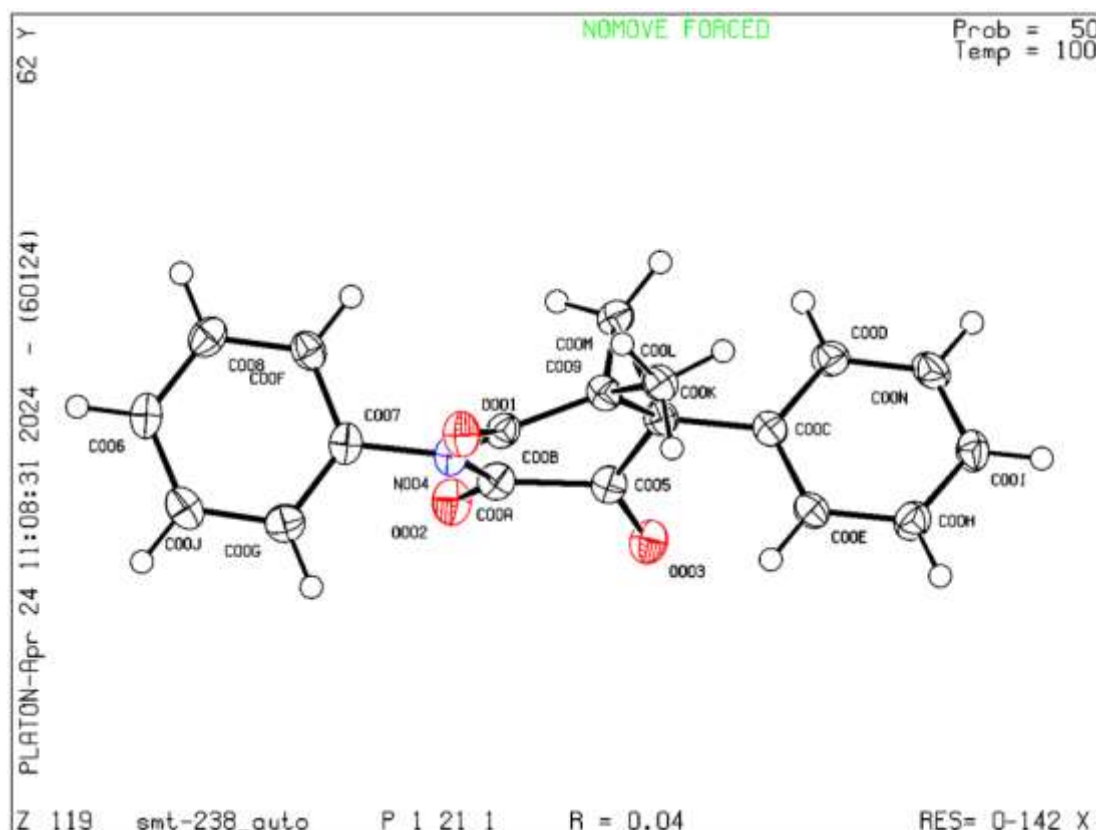

Figure S2: Ellipsoid plot

**Table S2: Crystallographic description of 1-methyl-3,6-diphenyl-3-azabicyclo[4.1.0]heptane-2,4,5-trione (2a):**

|                                   |                                                       |
|-----------------------------------|-------------------------------------------------------|
| Identification code               | SMT-238_auto                                          |
| Empirical formula                 | C <sub>19</sub> H <sub>15</sub> NO <sub>3</sub>       |
| Formula weight                    | 305.32                                                |
| Temperature                       | 100 K                                                 |
| Wavelength                        | 0.71073                                               |
| Crystal system                    | monoclinic                                            |
| Space group                       | P21                                                   |
| Unit cell dimensions              | a = 10.2750(5) Å                      a = 90°.        |
|                                   | b = 6.3644(3) Å                      b = 112.449(6)°. |
|                                   | c = 12.1715(6) Å                      g = 90°.        |
| Volume                            | 735.63(7) Å <sup>3</sup>                              |
| Z                                 | 2                                                     |
| Density (calculated)              | 1.378 Mg/m <sup>3</sup>                               |
| Absorption coefficient            | 0.094 mm <sup>-1</sup>                                |
| F(000)                            | 320.0                                                 |
| Crystal size                      | 0.20 x 0.24 x 0.18 mm <sup>3</sup>                    |
| Theta range for data collection   | 6.588 to 52.712°.                                     |
| Index ranges                      | -12 ≤ h ≤ 12, -7 ≤ k ≤ 7, -15 ≤ l ≤ 13                |
| Reflections collected             | 7187                                                  |
| Independent reflections           | 2879 [Rint = 0.0310, Rsigma = 0.0364]                 |
| Completeness to theta = 27.71°    | 100 %                                                 |
| Absorption correction             | None                                                  |
| Refinement method                 | Full-matrix least-squares on F <sup>2</sup>           |
| Data / restraints / parameters    | 2879/1/210                                            |
| Goodness-of-fit on F <sup>2</sup> | 1.069                                                 |
| Final R indices [I > 2sigma(I)]   | R <sub>1</sub> = 0.0355, wR <sub>2</sub> = 0.0813     |
| R indices (all data)              | R <sub>1</sub> = 0.0390, wR <sub>2</sub> = 0.0832     |
| Largest diff. peak and hole       | 0.19 and -0.16 e.Å <sup>-3</sup>                      |
| CCDC                              | 2350836                                               |

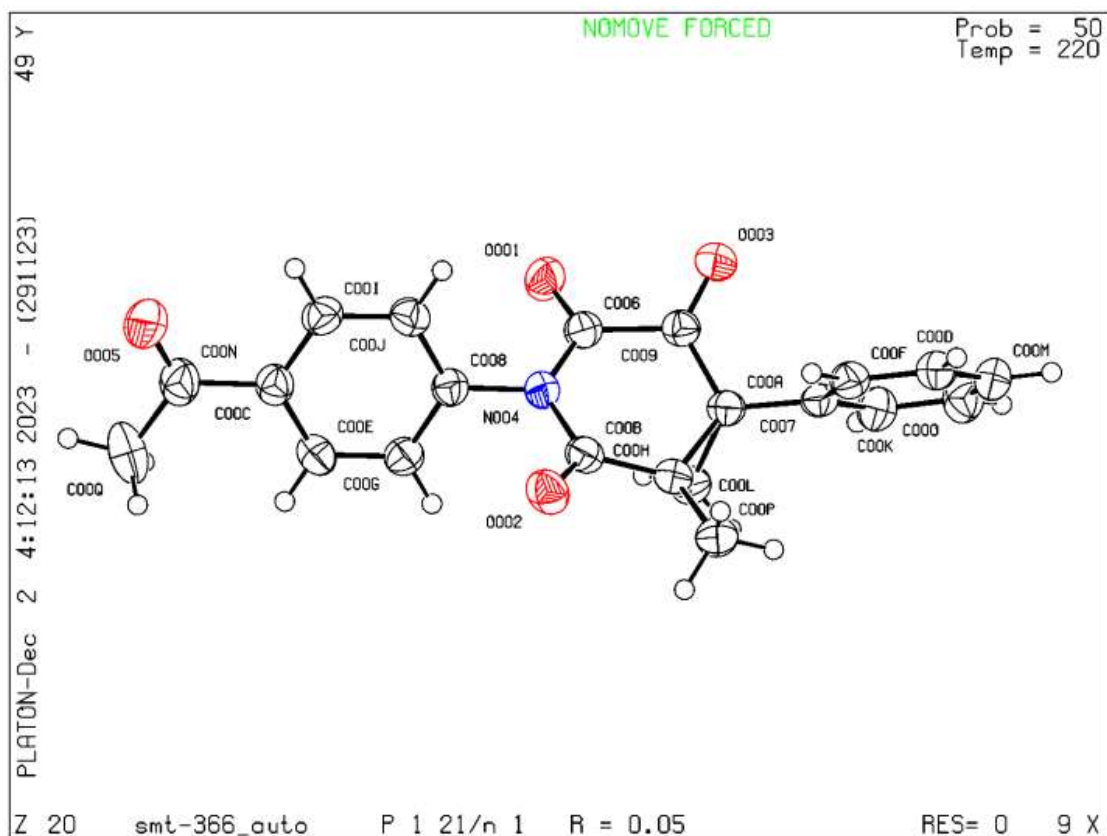

**Figure S3:** Ellipsoid plot

**Table S3: Crystallographic description of 3-(4-acetylphenyl)-1-methyl-6-phenyl-3-azabicyclo[4.1.0]heptane-2,4,5-trione (2j):**

|                        |                                                 |                   |
|------------------------|-------------------------------------------------|-------------------|
| Identification code    | SMT-366_auto                                    |                   |
| Empirical formula      | C <sub>21</sub> H <sub>17</sub> NO <sub>4</sub> |                   |
| Formula weight         | 347.36                                          |                   |
| Temperature/K          | 224(40)                                         |                   |
| Wavelength             | 0.71073                                         |                   |
| Crystal system         | Monoclinic                                      |                   |
| Space group            | P 21/n                                          |                   |
| Unit cell dimensions   | a = 14.2969(17) Å                               | α = 90°.          |
|                        | b = 6.8015(6) Å                                 | β = 112.036(14)°. |
|                        | c = 18.834(2) Å                                 | γ = 90°.          |
| Volume                 | 1697.6(4) Å <sup>3</sup>                        |                   |
| Z                      | 4                                               |                   |
| Density (calculated)   | 1.359 Mg/m <sup>3</sup>                         |                   |
| Absorption coefficient | 0.095 mm <sup>-1</sup>                          |                   |
| F(000)                 | 728.0                                           |                   |

|                                   |                                                   |
|-----------------------------------|---------------------------------------------------|
| Crystal size                      | 0.20 x 0.18 x 0.16 mm <sup>3</sup>                |
| Theta range for data collection   | 6.428 to 61.838°.                                 |
| Index ranges                      | -17<=h<=18, -7<=k<=9, -26<=l<=22                  |
| Reflections collected             | 10835                                             |
| Independent reflections           | 3870 [R(int) = 0.0569, R(sigma) = 0.0714]         |
| Completeness to theta = 25.242°   | 100 %                                             |
| Absorption correction             | None                                              |
| Refinement method                 | Full-matrix least-squares on F <sup>2</sup>       |
| Data / restraints / parameters    | 3870 / 0 / 237                                    |
| Goodness-of-fit on F <sup>2</sup> | 1.064                                             |
| Final R indices [I>2sigma(I)]     | R <sub>1</sub> = 0.0543, wR <sub>2</sub> = 0.1310 |
| R indices (all data)              | R <sub>1</sub> = 0.0865, wR <sub>2</sub> = 0.1469 |
| Largest diff. peak and hole       | 0.20 and -0.19 e.Å <sup>-3</sup>                  |
| CCDC                              | 2311799                                           |

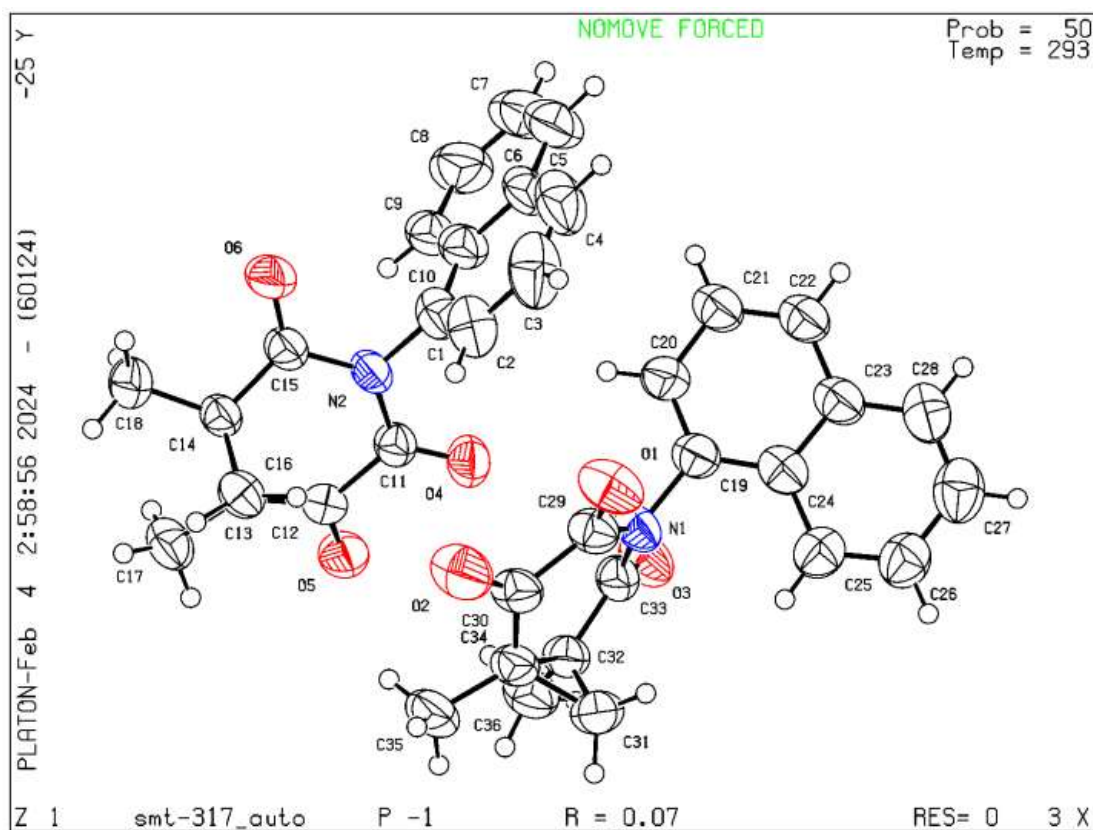

**Figure S4:** Ellipsoid plot

**Table S4: Crystallographic description of 1,6-dimethyl-3-(naphthalen-1-yl)-3-azabicyclo[4.1.0]heptane-2,4,5-trione (4i):**

|                                   |                                                                  |                    |
|-----------------------------------|------------------------------------------------------------------|--------------------|
| Identification code               | SMT-317_auto                                                     |                    |
| Empirical formula                 | C <sub>18</sub> H <sub>15</sub> NO <sub>3</sub>                  |                    |
| Formula weight                    | 293.31                                                           |                    |
| Temperature                       | 293 K                                                            |                    |
| Wavelength                        | 0.71073                                                          |                    |
| Crystal system                    | triclinic                                                        |                    |
| Space group                       | P-1                                                              |                    |
| Unit cell dimensions              | a = 10.6199(4) Å                                                 | a = 103.773° (4)°. |
|                                   | b = 10.8504(5) Å                                                 | b = 97.032(3) °.   |
|                                   | c = 15.1555(6) Å                                                 | g = 114.529(4).    |
| Volume                            | 1493.92(12) Å <sup>3</sup>                                       |                    |
| Z                                 | 4                                                                |                    |
| Density (calculated)              | 1.304 g/cm <sup>3</sup>                                          |                    |
| Absorption coefficient            | 0.089 mm <sup>-1</sup>                                           |                    |
| F(000)                            | 616.0                                                            |                    |
| Crystal size                      | 0.24 x 0.19 x 0.18 mm <sup>3</sup>                               |                    |
| Theta range for data collection   | 6.26 to 52.742°.                                                 |                    |
| Index ranges                      | -13 ≤ h ≤ 13, -13 ≤ k ≤ 12, -18<br>≤ l ≤ 18                      |                    |
| Reflections collected             | 21311                                                            |                    |
| Independent reflections           | 6120 [R <sub>int</sub> = 0.0447, R <sub>sigma</sub> =<br>0.0486] |                    |
| Completeness to theta = 27.71°    | 100 %                                                            |                    |
| Absorption correction             | None                                                             |                    |
| Refinement method                 | Full-matrix least-squares on F <sup>2</sup>                      |                    |
| Data / restraints / parameters    | 6120/28/383                                                      |                    |
| Goodness-of-fit on F <sup>2</sup> | 1.070                                                            |                    |
| Final R indices [I > 2σ(I)]       | R <sub>1</sub> = 0.0652, wR <sub>2</sub> = 0.1858                |                    |
| R indices (all data)              | R <sub>1</sub> = 0.1049, wR <sub>2</sub> = 0.2094                |                    |
| Largest diff. peak and hole       | 0.57 and -0.28 e.Å <sup>-3</sup>                                 |                    |
| CCDC                              | 2330995                                                          |                    |



## (5) Synthesis of Substrates 1:

Substrates **1** were prepared following the reported procedure.<sup>2</sup>

### (i) Amide coupling for the synthesis of N-arylpropiolamides (S1):

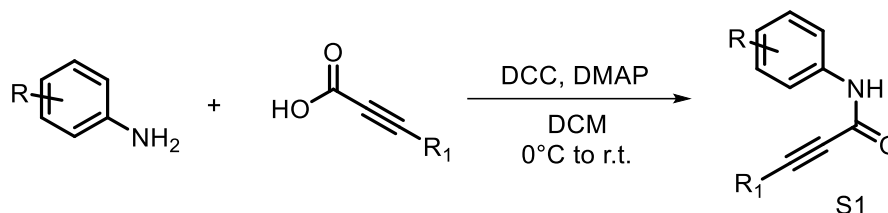

Phenylpropionic acid (1 equiv) and DMAP (10 mol%) were charged into an oven-dried round-bottom flask, which was then purged with nitrogen gas for 10 minutes. After dissolving the mixture in DCM, amine (1.1 equiv) was added. The mixture was cooled to 0°C and a saturated solution of DCC (1.0 equiv) in DCM was added dropwise. After addition the reaction mixture was warmed to the room temperature and stirred for approximately 12 hours (overnight). The contents of the flask were then filtered using a plug of Celite. The filtrate obtained was then concentrated under reduced pressure while adsorbing onto silica gel. The obtained adsorbed silica plug was then purified using silica gel column chromatography (PE:EA=19:1) to afford pure product **S1**.

### (ii) Methallylation of S1

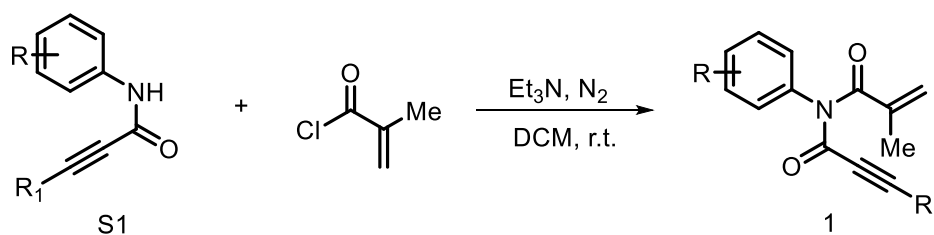

An oven-dried round-bottom flask equipped with a magnetic stir bar was charged with S1 (1.0 equiv) then sealed with septum and purged with nitrogen gas for 10 minutes. Afterwards DCM were added. Then, Methacryloyl chloride (1.5 equiv) and Et<sub>3</sub>N (2.0 equiv) were added successively in dropwise manner while stirring the reaction mixture. The reaction mixture was

then stirred at room temperature for 6 h until **S1** was consumed completely. The solvent was removed under reduced pressure while adsorbing the filtrate onto silica gel. The crude residue was purified by silica gel column chromatography to afford pure product **1**. The prepared substrates are as follows:

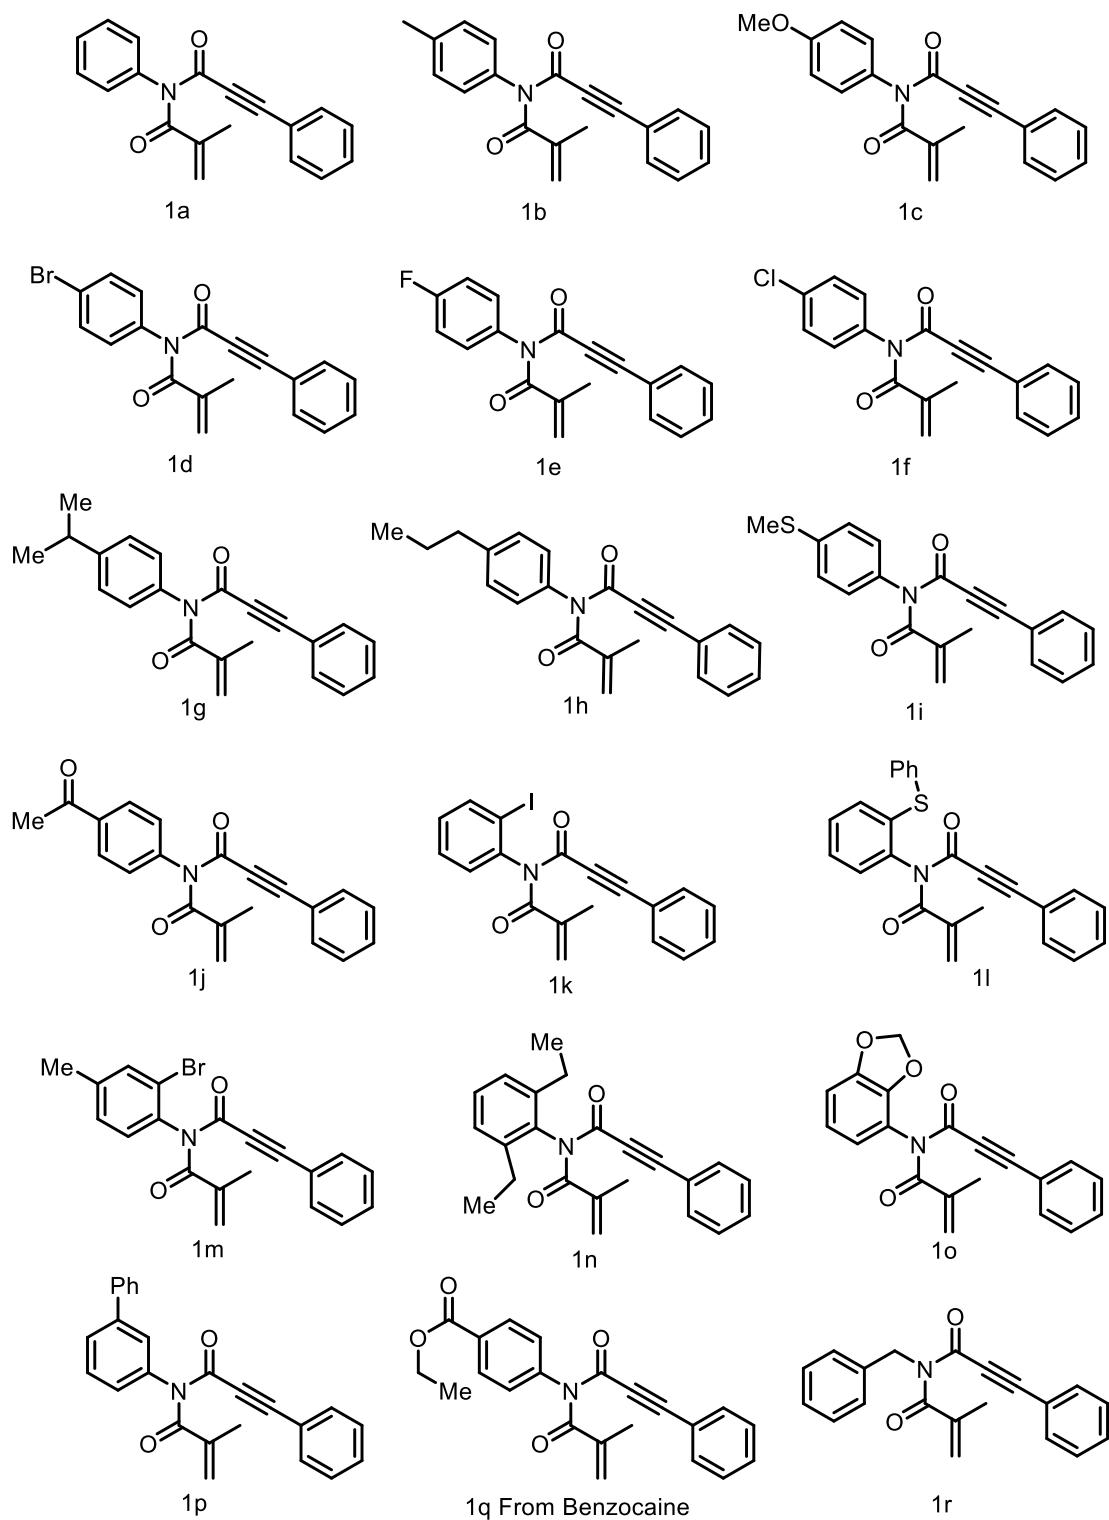

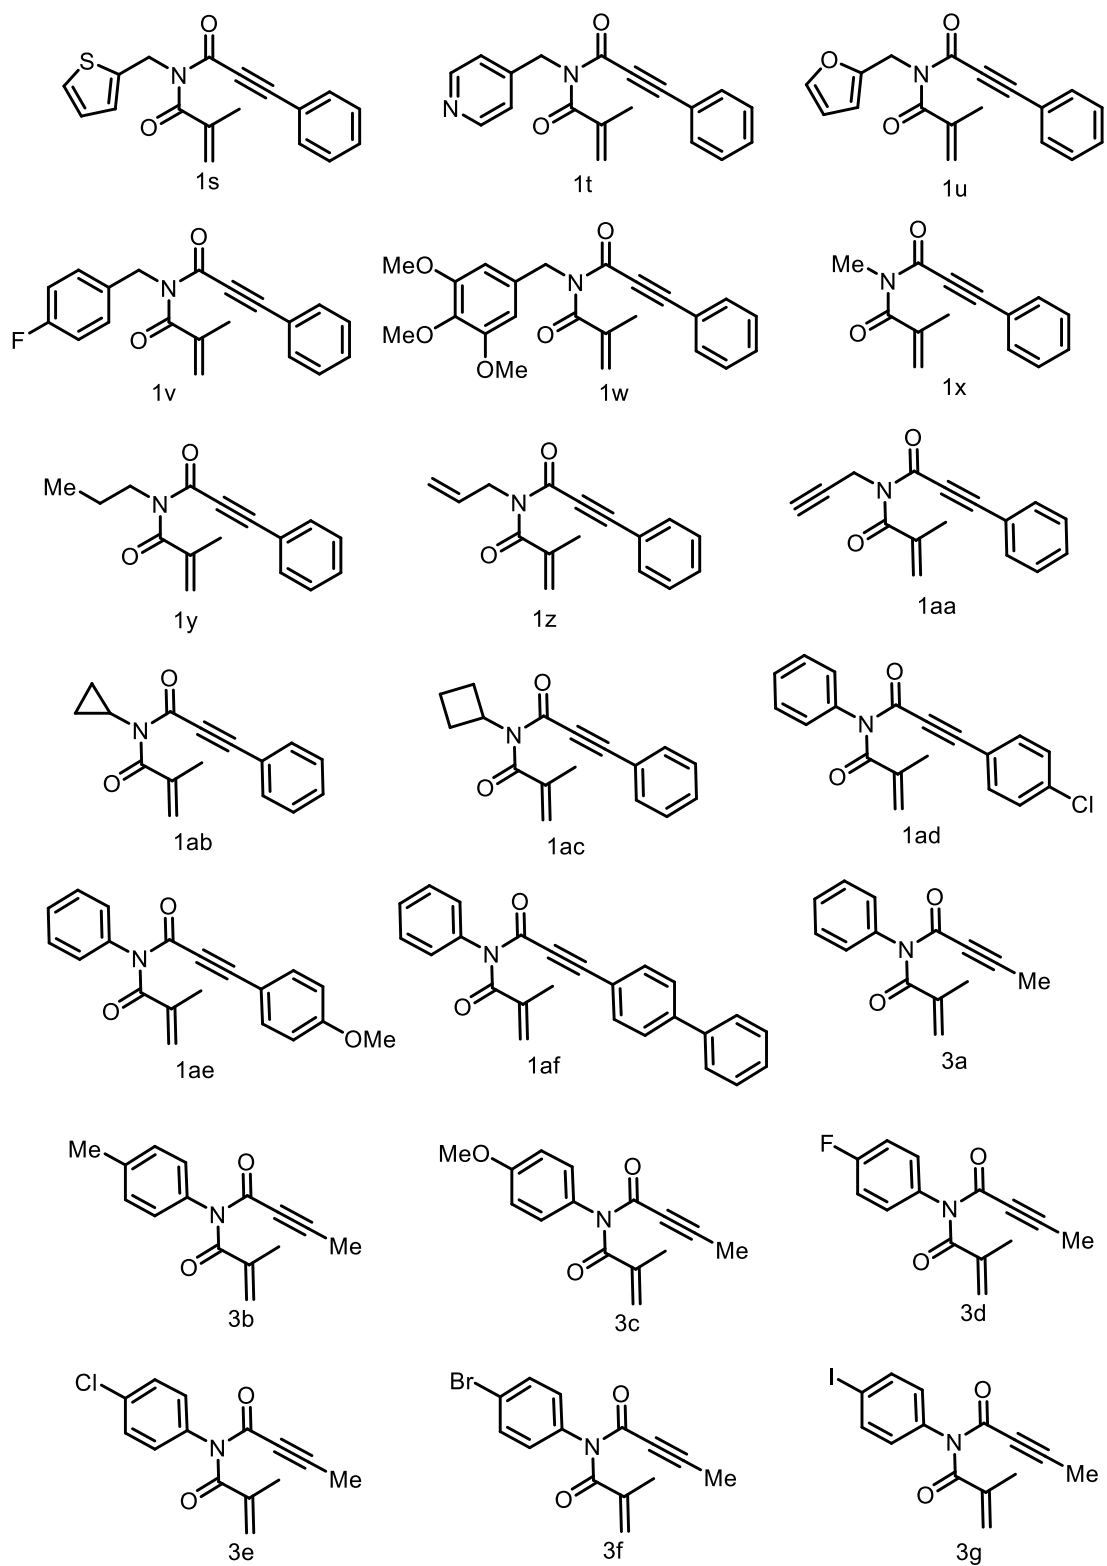

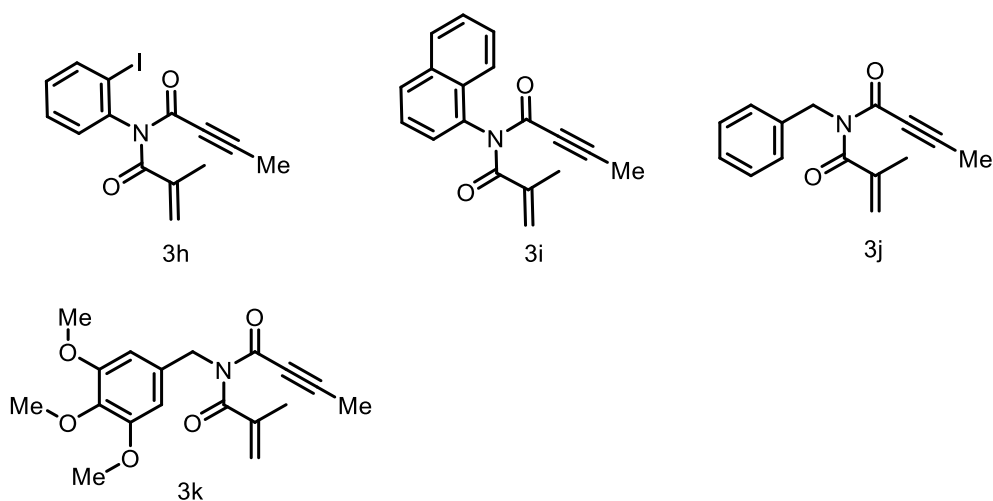

### (6) General procedure for the Synthesis of bicyclo[4.1.0]heptane

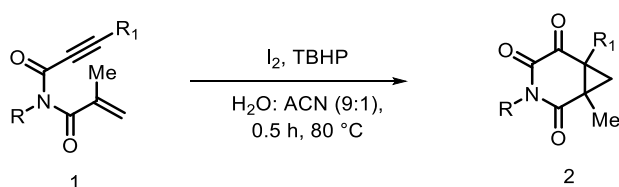

An oven-dried round bottom flask equipped with a magnetic stir bar was charged with **1** (100 mg, 0.346 mmol) then  $I_2$ , TBHP,  $H_2O$ : ACN solution was added. The reaction mixture was then stirred at 80 °C oil bath for 0.5hrs (monitored reactions by TLC). Afterwards the solvent was removed under reduced pressure and the resulting residue was purified by silica gel column chromatography to afford pure product **2**.

## (7) General procedure for post functionalization of products

### (7.1) Sonogashira Coupling

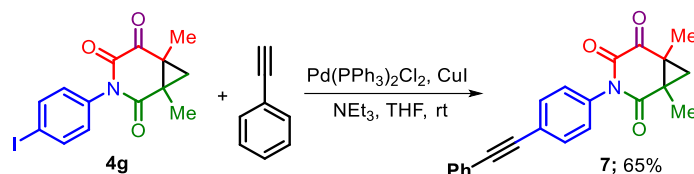

To a solution of the compound **4g** (0.2 mmol) and phenylacetylene (0.3 mmol) in  $\text{NEt}_3$  (1.5 mL) and THF (1.5 mL) was added  $\text{PdCl}_2(\text{PPh}_3)_2$  (7.02 mg, 0.01 mmol) and  $\text{CuI}$  (2.85 mg, 0.015 mmol) under an argon atmosphere. The reaction mixture was stirred at room temperature. The reaction progress was monitored by TLC. After completion of the reaction, the residue was extracted with EtOAc (10 mL x 3). The combined organic phases were dried over anhydrous  $\text{Na}_2\text{SO}_4$  and evaporated under reduced pressure to remove the solvent. The given residue was purified by flash chromatography using a mixture of EtOAc and P.E. as eluent to provide the substrates **7**.

### (7.2) Suzuki- Miyaura Coupling

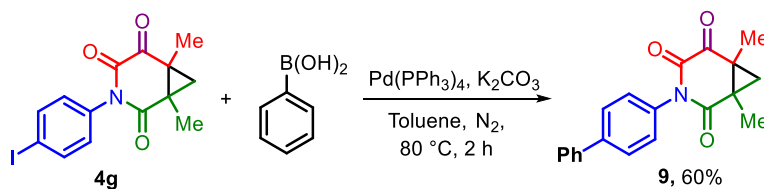

To a solution of compound **4g** (0.2 mmol, 0.274 mmol),  $\text{Pd}(\text{OAc})_2$  (0.1 equiv, 0.02 mmol) in DMF (4 mL) and water (1 mL) was added phenylboronic acid (2 equiv, 0.4 mmol) and  $\text{K}_2\text{CO}_3$  (2equiv, 0.4 mmol) and the mixture was stirred under reflux at 85°C. The reaction progress was monitored by TLC. After completion of the reaction, the reaction mixture was washed with brine, and the aqueous phase was re-extracted with ethyl acetate. The combined organic extracts were dried over  $\text{Na}_2\text{SO}_4$ , concentrated in vacuum, and the resulting residue was purified by silica gel column chromatography (EtOAc/PE) to afford the desired product **9**.

**(8) Characterization Data for the Products 1,2,3:**

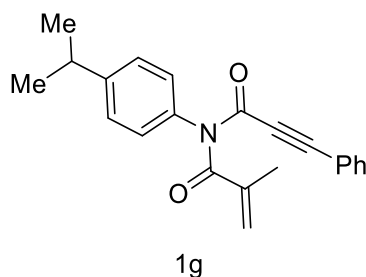

***N*-(4-isopropylphenyl)-*N*-(3-phenylpropioloyl)methacrylamide (1g):** Purification by silica gel chromatography (PE:EA=75:25) afforded the desired **1g** as white solid in 85% yield (3.56 g); **<sup>1</sup>H-NMR** (400 MHz, CDCl<sub>3</sub>) δ 7.27 (t, *J* = 7.4 Hz, 1H), 7.22 (d, *J* = 8.4 Hz, 2H), 7.18-7.15 (m, 1H), 7.13 (dd, *J* = 4.6, 2.1 Hz, 2H), 7.11-7.08 (m, 3H), 5.61 (s, 1H), 5.41 (s, 1H), 2.90-2.83 (m, 1H), 1.96 (s, 3H), 1.18 (d, *J* = 7.0 Hz, 6H); **<sup>13</sup>C-NMR** (100 MHz, CDCl<sub>3</sub>) δ 173.2, 154.4, 149.5, 141.3, 135.4, 132.7, 132.4, 130.7, 128.4, 128.3, 127.3, 127.2, 126.6, 122.0, 119.9, 119.3, 94.3, 82.6, 33.7, 23.7, 18.6, 17.7; **MS** (ESI) *m/z* 332 [M+H]<sup>+</sup>; **HRMS** Calculated for C<sub>22</sub>H<sub>22</sub>NO<sub>2</sub><sup>+</sup> 332.1645; Found: 332.1652. [M+H]<sup>+</sup>.

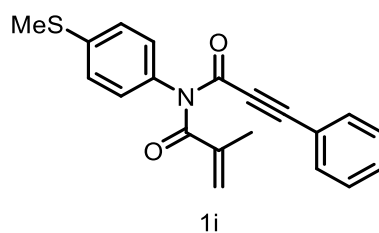

***N*-(2,6-diethylphenyl)-*N*-(3-phenylpropioloyl)methacrylamide (1i):** Purification by silica gel chromatography (PE:EA=75:25) afforded the desired **1i** as white solid in 85% yield (3.56 g); **<sup>1</sup>H-NMR** (400 MHz, CDCl<sub>3</sub>) δ 7.44-7.38 (m, 1H), 7.33-7.28 (m, 6H), 7.22-7.19 (m, 2H), 5.71 (s, 1H), 5.54 (s, 1H), 2.49 (s, 3H), 2.05 (s, 3H); **<sup>13</sup>C-NMR** (100 MHz, CDCl<sub>3</sub>) δ 173.1, 154.3, 141.3, 139.9, 134.4, 132.7, 132.4, 130.8, 129.7, 128.8, 128.5, 128.1, 127.5, 126.7, 122.5, 119.3, 94.5, 82.6, 18.7, 15.5; **MS** (ESI) *m/z* 336 [M+H]<sup>+</sup>; **HRMS** Calculated for C<sub>20</sub>H<sub>18</sub>NO<sub>2</sub>S<sup>+</sup> 336.1083; Found: 336.1115. [M+H]<sup>+</sup>.

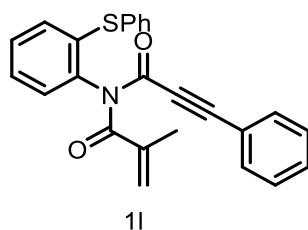

***N*-(3-phenylpropioloyl)-*N*-(2-(phenylthio)phenyl)methacrylamide (11):** Purification by silica gel chromatography (PE:EA=75:25) afforded the desired **11** as brown solid in 85% yield (3.56 g); **<sup>1</sup>H-NMR** (400 MHz, CDCl<sub>3</sub>) δ 7.42-7.33 (m, 6H), 7.32-7.26 (m, 3H), 7.25-7.22 (m, 5H), 5.78 (s, 1H), 5.47 (d, *J* = 1.5 Hz, 1H), 2.12 (s, 3H); **<sup>13</sup>C-NMR** (100 MHz, CDCl<sub>3</sub>) δ 172.5, 154.2, 141.3, 137.4, 137.3, 133.7, 132.9, 132.3, 132.1, 130.8, 130.6, 129.8, 129.3, 128.5, 127.8, 127.7, 121.2, 119.4, 94.0, 82.8, 19.0; **MS** (ESI) *m/z* 398 [M+H]<sup>+</sup>; HRMS Calculated for C<sub>25</sub>H<sub>20</sub>NO<sub>2</sub>S<sup>+</sup> 398.1209; Found: 398.1239. [M+H]<sup>+</sup>.

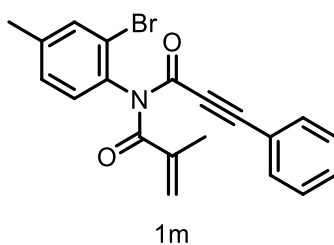

***N*-(2-bromo-4-methylphenyl)-*N*-(3-phenylpropioloyl)methacrylamide (1m):** Purification by silica gel chromatography (PE:EA=75:25) afforded the desired **1m** as white solid in 85% yield (3.56 g); **<sup>1</sup>H-NMR** (400 MHz, CDCl<sub>3</sub>) δ 7.56 (s, 1H), 7.44-7.40 (m, 1H), 7.35-7.23 (m, 6H), 5.78 (s, 1H), 5.50 (s, 1H), 2.41 (s, 3H), 2.14 (s, 3H); **<sup>13</sup>C-NMR** (100 MHz, CDCl<sub>3</sub>) δ 172.1, 154.0, 141.2, 141.1, 134.3, 133.9, 132.8, 130.9, 130.8, 129.1, 128.5, 123.5, 121.2, 119.4, 94.1, 82.5, 20.9, 19.0; **MS** (ESI) *m/z* 382 [M+H]<sup>+</sup>; HRMS Calculated for C<sub>20</sub>H<sub>17</sub>BrNO<sub>2</sub><sup>+</sup> 382.0437; Found: 382.0440. [M+H]<sup>+</sup>.

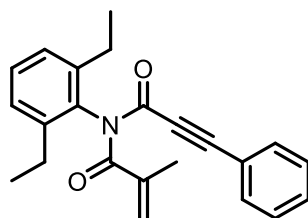

1n

***N*-(2,6-diethylphenyl)-*N*-(3-phenylpropioloyl)methacrylamide (1n):** Purification by silica gel chromatography (PE:EA=75:25) afforded the desired **1n** as white solid in 85% yield (3.56 g); **<sup>1</sup>H-NMR** (400 MHz, CDCl<sub>3</sub>) δ 7.45-7.39 (m, 2H), 7.32-7.26 (m, 4H), 7.16 (d, *J* = 8.0 Hz, 2H), 5.60 (s, 1H), 5.47 (s, 1H), 2.63 (q, *J* = 7.5 Hz, 4H), 2.18 (s, 3H), 1.26 (t, *J* = 7.6 Hz, 6H); **<sup>13</sup>C-NMR** (100 MHz, CDCl<sub>3</sub>) δ 172.6, 155.3, 142.5, 142.1, 134.9, 133.1, 130.9, 129.7, 128.5, 126.6, 119.4, 119.2, 93.9, 82.6, 29.7, 24.4, 19.4, 14.3; **MS** (ESI) *m/z* 346 [M+H]<sup>+</sup>; **HRMS** Calculated for C<sub>23</sub>H<sub>24</sub>NO<sub>2</sub><sup>+</sup> 346.1842; Found: 386.1869. [M+H]<sup>+</sup>.

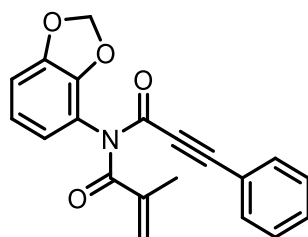

1o

***N*-(2,6-diethylphenyl)-*N*-(3-phenylpropioloyl)methacrylamide (1o):** Purification by silica gel chromatography (PE:EA=75:25) afforded the desired **1o** as white solid in 85% yield (3.56 g); **<sup>1</sup>H-NMR** (400 MHz, CDCl<sub>3</sub>) δ 7.41-7.30 (m, 5H), 6.91-6.86 (m, 2H), 6.78-6.76 (m, 1H), 5.98 (s, 2H), 5.74 (s, 1H), 5.52 (d, *J* = 1.0 Hz, 1H), 2.06 (s, 3H); **<sup>13</sup>C-NMR** (100 MHz, CDCl<sub>3</sub>) δ 172.7, 153.8, 148.9, 143.9, 141.0, 132.9, 132.7, 131.0, 128.7, 122.7, 122.1, 121.9, 120.2, 119.5, 109.1, 101.9, 93.7, 82.5, 18.8; **MS** (ESI) *m/z* 334 [M+H]<sup>+</sup>; **HRMS** Calculated for C<sub>20</sub>H<sub>16</sub>NO<sub>4</sub><sup>+</sup> 334.1074; Found: 334.1082. [M+H]<sup>+</sup>.



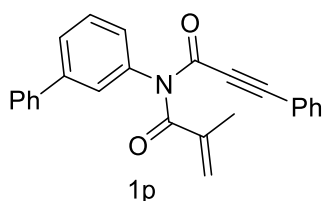

***N*-([1,1'-biphenyl]-3-yl)-*N*-(3-phenylpropioloyl)methacrylamide (1p):** Purification by silica gel chromatography (PE:EA=75:25) afforded the desired **1p** as white solid in 85% yield (3.56 g); **<sup>1</sup>H-NMR** (400 MHz, CDCl<sub>3</sub>) δ 7.69 (d, *J* = 8.3 Hz, 1H), 7.63-7.55 (m, 4H), 7.47 (t, *J* = 7.4 Hz, 2H), 7.41-7.37 (m, 2H), 7.34-7.29 (m, 5H), 5.81 (s, 1H), 5.60 (s, 1H), 2.13 (s, 3H); **<sup>13</sup>C-NMR** (100 MHz, CDCl<sub>3</sub>) δ 173.2, 154.3, 142.6, 141.3, 139.7, 138.2, 132.7, 130.8, 129.6, 128.8, 128.4, 127.7, 127.4, 127.3, 127.2, 127.1, 122.5, 119.3, 94.5, 82.6, 18.7; **MS** (ESI) *m/z* 366 [M+H]<sup>+</sup>; HRMS Calculated for C<sub>25</sub>H<sub>20</sub>NO<sub>2</sub><sup>+</sup> 366.1489; Found: 366.1497. [M+H]<sup>+</sup>.

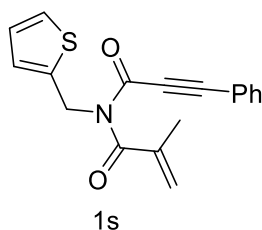

***N*-(3-phenylpropioloyl)-*N*-(thiophen-2-ylmethyl)methacrylamide (1s):** Purification by silica gel chromatography (PE:EA=90:10) afforded the desired **1s** as white solid in 85% yield (3.56 g); **<sup>1</sup>H-NMR** (400 MHz, CDCl<sub>3</sub>) δ 7.50 (d, *J* = 8.0 Hz, 2H), 7.43 (d, *J* = 8.0 Hz, 1H), 7.36 (t, *J* = 7.8 Hz, 2H), 7.20 (t, *J* = 4.0 Hz, 1H), 7.09 (d, *J* = 2.3 Hz, 1H), 6.92 (t, *J* = 4.1 Hz, 1H), 5.44 (s, 1H), 5.38 (s, 1H), 5.21 (s, 2H), 2.06 (s, 3H); **<sup>13</sup>C-NMR** (100 MHz, CDCl<sub>3</sub>) δ 173.6, 154.2, 142.0, 138.2, 132.6, 132.3, 130.7, 129.4, 128.8, 128.6, 128.2, 127.8, 127.5, 126.8, 126.6, 126.5, 125.8, 122.3, 119.3, 94.5, 82.6, 42.4, 18.7; **MS** (ESI) *m/z* 310 [M+H]<sup>+</sup>; HRMS Calculated for C<sub>18</sub>H<sub>16</sub>NO<sub>2</sub>S<sup>+</sup> 310.0896; Found: 310.0899. [M+H]<sup>+</sup>.

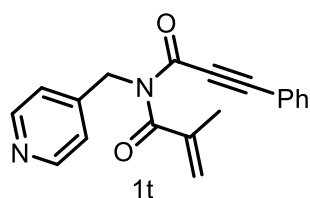

***N*-(3-phenylpropioloyl)-*N*-(pyridin-4-ylmethyl)methacrylamide (1t):** Purification by silica gel chromatography (PE:EA=75:25) afforded the desired **1t** as purple solid in 85% yield (3.56 g); **<sup>1</sup>H-NMR** (400 MHz, DMSO-*d*6)  $\delta$  8.51 (d, *J* = 1.2 Hz, 2H), 7.75 (d, *J* = 3.4 Hz, 2H), 7.51 (s, 2H), 7.39 (d, *J* = 4.7 Hz, 3H), 6.91 (s, 1H), 6.65 (s, 1H), 5.36 (s, 1H), 5.29 (s, 1H), 1.89 (s, 3H); **<sup>13</sup>C-NMR** (100 MHz, DMSO-*d*6)  $\delta$  168.6, 168.6, 161.4, 150.0, 145.9, 140.4, 131.1, 130.0, 128.9, 128.7, 127.9, 122.8, 119.9, 119.5, 62.4, 18.5; **MS** (ESI) *m/z* 305 [M+H]<sup>+</sup>; HRMS Calculated for C<sub>19</sub>H<sub>17</sub>N<sub>2</sub>O<sub>2</sub><sup>+</sup> 305.1285; Found: 305.1522. [M+H]<sup>+</sup>.

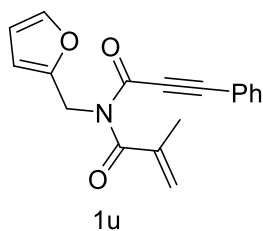

***N*-(furan-2-ylmethyl)-*N*-(3-phenylpropioloyl)methacrylamide (1u):** Purification by silica gel chromatography (PE:EA=90:10) afforded the desired **1u** as white solid in 85% yield (3.56 g); **<sup>1</sup>H-NMR** (400 MHz, CDCl<sub>3</sub>)  $\delta$  7.50 (d, *J* = 8.3 Hz, 2H), 7.44-7.41 (m, 1H), 7.37 (q, *J* = 3.7 Hz, 2H), 7.22-7.20 (m, 1H), 7.09 (s, 1H), 6.91 (t, *J* = 3.5 Hz, 1H), 5.44 (s, 1H), 5.38 (s, 1H), 5.21 (s, 2H), 2.06 (s, 3H); **<sup>13</sup>C-NMR** (100 MHz, CDCl<sub>3</sub>)  $\delta$  173.7, 154.4, 142.1, 138.3, 132.4, 130.8, 128.7, 127.9, 126.6, 125.9, 122.4, 119.5, 94.6, 82.7, 42.6, 18.7; **MS** (ESI) *m/z* 294 [M+H]<sup>+</sup>; HRMS Calculated for C<sub>18</sub>H<sub>16</sub>NO<sub>3</sub><sup>+</sup> 294.1125; Found: 294.1138. [M+H]<sup>+</sup>.

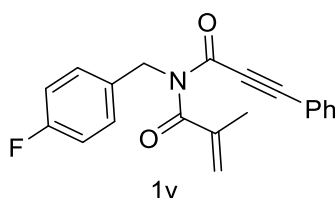

***N*-(4-fluorobenzyl)-*N*-(3-phenylpropioloyl)methacrylamide (1v):** Purification by silica gel chromatography (PE:EA=85:15) afforded the desired **1v** as white solid in 85% yield (3.56 g); **<sup>1</sup>H-NMR** (400 MHz, CDCl<sub>3</sub>) δ 7.50-7.45 (m, 2H), 7.44-7.36 (m, 5H), 7.01 (t, *J* = 8.8 Hz, 2H), 5.47 (s, 1H), 5.37 (s, 1H), 5.02 (s, 2H), 2.09 (s, 3H); **<sup>13</sup>C-NMR** (100 MHz, CDCl<sub>3</sub>) δ 174.1, 163.5, 161.0, 154.8, 142.3, 132.4, 130.8, 130.5, 130.4, 128.7, 128.0, 122.6, 119.5, 115.7, 115.5, 115.3, 94.6, 82.9, 47.2, 18.8; **<sup>19</sup>F NMR** (376 MHz, CDCl<sub>3</sub>) δ -112.9 (s, 1F); **MS** (ESI) *m/z* 322 [M+H]<sup>+</sup>; **HRMS** Calculated for C<sub>20</sub>H<sub>17</sub>FNO<sub>2</sub><sup>+</sup> 322.1238; Found: 322.1242. [M+H]<sup>+</sup>.

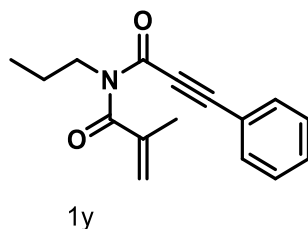

***N*-(3-phenylpropioloyl)-*N*-propylmethacrylamide (1y):** Purification by silica gel chromatography (PE:EA=98:2) afforded the desired **1y** as colourless oil in 85% yield (1.63 g); **<sup>1</sup>H-NMR** (400 MHz, CDCl<sub>3</sub>) δ 7.51-7.48 (m, 2H), 7.45-7.41 (m, 1H), 7.38-7.34 (m, 2H), 5.47-5.46 (m, 2H), 3.83-3.80 (m, 2H), 2.06 (t, *J* = 1.2 Hz, 3H), 1.72-1.62 (m, 2H), 0.94 (t, *J* = 7.4 Hz, 3H); **<sup>13</sup>C-NMR** (100 MHz, CDCl<sub>3</sub>) δ 174.6, 155.2, 142.7, 132.5, 130.8, 128.8, 121.8, 93.7, 83.1, 46.8, 22.1, 19.0, 11.5; **MS** (ESI) *m/z* 256 [M+H]<sup>+</sup>; **HRMS** Calculated for C<sub>16</sub>H<sub>18</sub>NO<sub>2</sub><sup>+</sup> 256.1332; Found: 256.1343. [M+H]<sup>+</sup>.

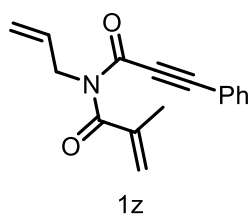

***N*-allyl-*N*-(3-phenylpropioloyl)methacrylamide (1z):** Purification by silica gel chromatography (PE:EA=75:25) afforded the desired **1z** as white solid in 85% yield (3.56 g); **<sup>1</sup>H-NMR** (400 MHz, CDCl<sub>3</sub>) δ 7.38-7.36 (m, 2H), 7.34-7.28 (m, 1H), 7.26-7.21 (m, 2H), 5.83-5.72 (m, 1H), 5.37-5.36 (m, 2H), 5.15 (dq, *J* = 17.1, 1.3 Hz, 1H), 5.07 (dq, *J* = 10.3, 1.2 Hz, 1H), 4.35-4.33 (m, 2H), 1.95 (s, 3H); **<sup>13</sup>C-NMR** (100 MHz, CDCl<sub>3</sub>) δ 186.3, 171.7, 158.4, 130.9, 130.7, 130.6, 128.9, 119.6, 45.5, 43.7, 34.8, 29.1, 16.1; **MS** (ESI) *m/z* 254 [M+H]<sup>+</sup>; HRMS Calculated for C<sub>16</sub>H<sub>16</sub>NO<sub>2</sub><sup>+</sup> 254.1176; Found: 254.1168. [M+H]<sup>+</sup>.

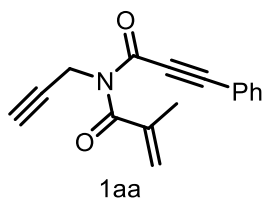

***N*-(3-phenylpropioloyl)-*N*-(prop-2-yn-1-yl)methacrylamide (1aa):** Purification by silica gel chromatography (PE:EA=75:25) afforded the desired **1aa** as white solid in 85% yield (3.56 g); **<sup>1</sup>H-NMR** (400 MHz, CDCl<sub>3</sub>) δ 7.48-7.39 (m, 3H), 7.35-7.31 (m, 2H), 5.55-5.51 (m, 2H), 4.56 (d, *J* = 2.5 Hz, 2H), 2.25 (t, *J* = 2.5 Hz, 1H), 2.04 (s, 3H); **<sup>13</sup>C-NMR** (100 MHz, CDCl<sub>3</sub>) δ 173.6, 154.4, 142.2, 132.4, 132.2, 130.8, 128.7, 121.7, 119.5, 93.7, 82.8, 47.0, 18.9; **MS** (ESI) *m/z* 252 [M+H]<sup>+</sup>; HRMS Calculated for C<sub>16</sub>H<sub>14</sub>NO<sub>2</sub><sup>+</sup> 252.1019; Found: 252.1012. [M+H]<sup>+</sup>.

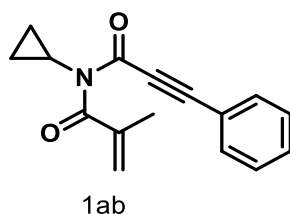

***N*-cyclopropyl-*N*-(3-phenylpropioloyl)methacrylamide (1ab):** Purification by silica gel chromatography (PE:EA=98:2) afforded the desired **1ab** as yellow semisolid in 80% yield (1.52 g); **<sup>1</sup>H-NMR** (400 MHz, CDCl<sub>3</sub>) δ 7.53-7.51 (m, 2H), 7.45-7.41 (m, 1H), 7.38-7.34 (m, 2H), 5.54-5.52 (m, 2H), 2.91-2.86 (m, 1H), 2.01 (s, 3H), 1.07 (q, *J* = 6.8 Hz, 2H), 0.75-0.71 (m, 2H); **<sup>13</sup>C-NMR** (100 MHz, CDCl<sub>3</sub>) δ 175.3, 155.7, 142.4, 132.7, 130.8, 128.7, 123.2, 120.0, 93.3, 82.8, 28.1, 18.3, 9.2; **MS** (ESI) *m/z* 254 [M+H]<sup>+</sup>; HRMS Calculated for C<sub>16</sub>H<sub>16</sub>NO<sub>2</sub><sup>+</sup> 254.1176; Found: 254.1197. [M+H]<sup>+</sup>.

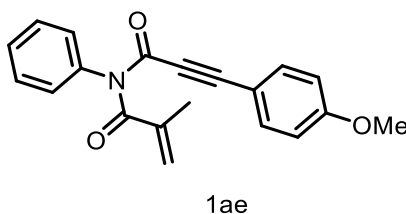

***N*-(3-(4-methoxyphenyl)propioloyl)-*N*-phenylmethacrylamide (1ae):** Purification by silica gel chromatography (PE:EA=75:25) afforded the desired **1ae** as white solid in 85% yield (3.56 g); **<sup>1</sup>H-NMR** (400 MHz, CDCl<sub>3</sub>) δ 7.55 (d, *J* = 8.3 Hz, 1H), 7.51-7.43 (m, 3H), 7.34-7.29 (m, 3H), 7.17 (dd, *J* = 6.9, 1.9 Hz, 1H), 6.80 (dd, *J* = 7.0, 2.0 Hz, 1H), 5.69 (s, 1H), 5.51 (d, *J* = 1.3 Hz, 1H), 3.79 (s, 3H), 2.07 (s, 3H); **<sup>13</sup>C-NMR** (100 MHz, CDCl<sub>3</sub>) δ 173.4, 161.7, 154.7, 141.6, 138.1, 134.9, 134.4, 131.4, 129.3, 129.0, 128.8, 128.8, 122.0, 120.4, 114.3, 111.3, 95.7, 82.5, 55.4, 18.8; **MS** (ESI) *m/z* 320 [M+H]<sup>+</sup>; HRMS Calculated for C<sub>20</sub>H<sub>18</sub>NO<sub>3</sub><sup>+</sup> 320.1281; Found: 320.1287. [M+H]<sup>+</sup>.

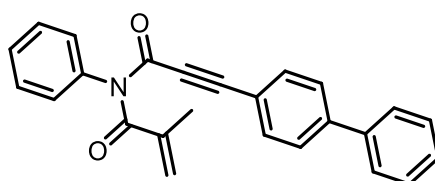

1af

***N*-(3-([1,1'-biphenyl]-4-yl)propioloyl)-*N*-phenylmethacrylamide (1af):** Purification by silica gel chromatography (PE:EA=75:25) afforded the desired **1af** as white solid in 85% yield (3.56 g); **<sup>1</sup>H-NMR** (400 MHz, CDCl<sub>3</sub>) δ 7.57-7.52 (m, 4H), 7.51-7.44 (m, 5H), 7.41-7.33 (m, 5H), 5.75 (s, 1H), 5.57 (d, *J* = 1.3 Hz, 1H), 2.10 (s, 3H); **<sup>13</sup>C-NMR** (100 MHz, CDCl<sub>3</sub>) δ 173.4, 154.5, 143.7, 141.5, 139.7, 138.0, 133.4, 133.1, 129.4, 129.0, 128.9, 128.8, 128.3, 127.2, 127.1, 122.4, 120.0, 118.3, 94.7, 83.4, 30.3, 29.8, 25.3, 18.9, 18.8; **MS** (ESI) *m/z* 366 [M+H]<sup>+</sup>; HRMS Calculated for C<sub>25</sub>H<sub>20</sub>NO<sub>2</sub><sup>+</sup> 366.1489; Found: 366.1498. [M+H]<sup>+</sup>.

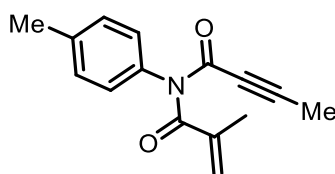

3b

***N*-methacryloyl-*N*-(*p*-tolyl)but-2-ynamide (3b):** Purification by silica gel chromatography (PE:EA=75:25) afforded the desired **3b** as white solid in 85% yield (3.56 g); **<sup>1</sup>H-NMR** (400 MHz, CDCl<sub>3</sub>) δ 7.15 (d, *J* = 8.0 Hz, 2H), 7.03 (d, *J* = 8.2 Hz, 2H), 5.60 (s, 1H), 5.43 (s, 1H), 2.29 (s, 3H), 1.94 (s, 3H), 1.78 (s, 3H); **<sup>13</sup>C-NMR** (100 MHz, CDCl<sub>3</sub>) δ 173.5, 154.4, 141.4, 138.5, 135.1, 129.9, 128.0, 122.5, 93.7, 74.6, 21.1, 18.6, 4.0; **MS** (ESI) *m/z* 242 [M+H]<sup>+</sup>; HRMS Calculated for C<sub>15</sub>H<sub>16</sub>NO<sub>2</sub><sup>+</sup> 242.1176; Found: 242.1181. [M+H]<sup>+</sup>.

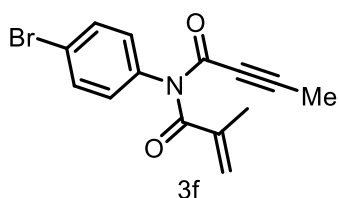

***N*-(4-bromophenyl)-*N*-methacryloylbut-2-ynamide (3f):** Purification by silica gel chromatography (PE:EA=75:25) afforded the desired **3f** as white solid in 85% yield (3.56 g); **<sup>1</sup>H-NMR** (400 MHz, CDCl<sub>3</sub>) δ 7.54 (d, *J* = 8.4 Hz, 1H), 7.07(d, *J* = 8.8 Hz, 1H), 5.65 (s, 1H), 5.35 (s, 2H), 2.00 (s, 3H), 1.90 (s, 3H); **<sup>13</sup>C-NMR** (100 MHz, CDCl<sub>3</sub>) δ 173.2, 153.9, 141.3, 136.7, 132.6, 132.0, 131.9, 129.9, 123.1, 122.6, 121.7, 121.4, 94.4, 74.5, 18.7, 4.3; **MS** (ESI) *m/z* 306 [M+H]<sup>+</sup>; HRMS Calculated for C<sub>14</sub>H<sub>13</sub>BrNO<sub>2</sub><sup>+</sup> 306.0124; Found: 306.0140. [M+H]<sup>+</sup>.

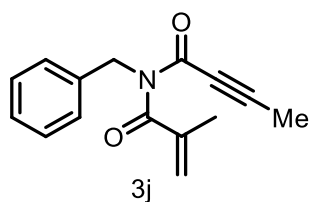

***N*-benzyl-*N*-methacryloylbut-2-ynamide (3j):** Purification by silica gel chromatography (PE:EA=75:25) afforded the desired **3j** as white solid in 85% yield (3.56 g); **<sup>1</sup>H-NMR** (400 MHz, CDCl<sub>3</sub>) δ 7.37-7.28 (m, 4H), 5.38 (s, 1H), 5.29 (s, 1H), 5.00 (s, 2H), 2.02 (s, 3H), 1.99 (s, 3H); **<sup>13</sup>C-NMR** (100 MHz, CDCl<sub>3</sub>) δ 170.3, 150.7, 149.0, 138.5, 133.2, 128.4, 117.6, 101.4, 90.0, 70.9, 56.6, 51.9, 44.0, 14.5; **MS** (ESI) *m/z* 255 [M+H]<sup>+</sup>; HRMS Calculated for C<sub>15</sub>H<sub>16</sub>NO<sub>2</sub><sup>+</sup> 242.1176; Found: 242.1179. [M+H]<sup>+</sup>.

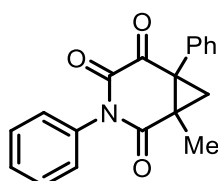

2a

**1-methyl-3,6-diphenyl-3-azabicyclo[4.1.0]heptane-2,4,5-trione (2a):** Purification by silica gel chromatography (PE:EA=85:15) afforded the desired **2a** as white solid in 85% yield (89.70 mg); **<sup>1</sup>H-NMR** (400 MHz, CDCl<sub>3</sub>) δ 7.54-7.45 (m, 6H), 7.29-7.27 (m, 2H), 7.21-7.18 (m, 2H), 2.58 (d, *J* = 6.0 Hz, 1H), 2.24 (d, *J* = 6.0 Hz, 1H), 1.30 (s, 3H); **<sup>13</sup>C-NMR** (100 MHz, CDCl<sub>3</sub>) δ 186.7, 172.2, 158.8, 134.0, 130.8, 130.7, 129.5, 129.3, 129.0, 129.0, 128.5, 127.9, 45.8, 35.3, 29.1, 16.2; **MS** (ESI) *m/z* 306 [M+H]<sup>+</sup>; HRMS Calculated for C<sub>19</sub>H<sub>16</sub>NO<sub>3</sub><sup>+</sup> 306.1125; Found: 306.1136 [M+H]<sup>+</sup>.

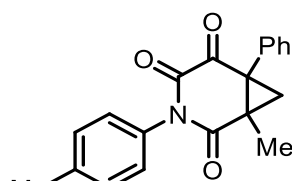

2b

**1-methyl-6-phenyl-3-(*p*-tolyl)-3-azabicyclo[4.1.0]heptane-2,4,5-trione (2b):** Purification by silica gel chromatography (PE:EA=85:15) afforded the desired **2b** as white solid in 82% yield (90.60 mg); **<sup>1</sup>H-NMR** (400 MHz, CDCl<sub>3</sub>) δ 7.41-7.34 (m, 3H), 7.25-7.20 (m, 2H), 7.18-7.15 (m, 2H), 6.92-7.03 (2H), 2.46 (d, *J* = 6.0 Hz, 1H), 2.33 (s, 3H), 2.12 (s, 1H), 1.19 (s, 3H); **<sup>13</sup>C-NMR** (100 MHz, CDCl<sub>3</sub>) δ 186.7, 172.3, 158.9, 139.3, 131.3, 130.8, 130.6, 130.2, 128.9, 127.4, 45.7, 35.2, 29.0, 21.2, 16.2; **MS** (ESI) *m/z* 320 [M+H]<sup>+</sup>; HRMS Calculated for C<sub>20</sub>H<sub>18</sub>NO<sub>3</sub><sup>+</sup> 320.1281; Found: 320.1266. [M+H]<sup>+</sup>.



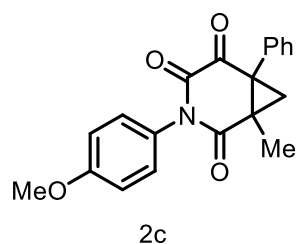

**3-(4-methoxyphenyl)-1-methyl-6-phenyl-3-azabicyclo[4.1.0]heptane-2,4,5-trione (2c):**

Purification by silica gel chromatography (PE:EA=80:20) afforded the desired **2c** as white solid in 80% yield (92.74 mg);  $^1\text{H-NMR}$  (400 MHz,  $\text{CDCl}_3$ )  $\delta$  7.46-7.42 (m, 3H), 7.25-7.23 (m, 2H), 7.09-7.06 (m, 2H), 7.01-6.98 (m, 2H), 3.84 (s, 3H), 2.52 (d,  $J = 6.0$  Hz, 1H), 2.20 (d,  $J = 5.9$  Hz, 1H), 1.27 (s, 3H);  $^{13}\text{C-NMR}$  (100 MHz,  $\text{CDCl}_3$ )  $\delta$  186.7, 172.3, 159.9, 159.0, 130.8, 130.7, 129.0, 128.8, 126.4, 114.8, 55.5, 45.8, 35.2, 29.0, 16.2; **MS** (ESI)  $m/z$  336  $[\text{M}+\text{H}]^+$ ; HRMS Calculated for  $\text{C}_{20}\text{H}_{18}\text{NO}_4^+$  336.1230; Found: 336.1209.  $[\text{M}+\text{H}]^+$ .

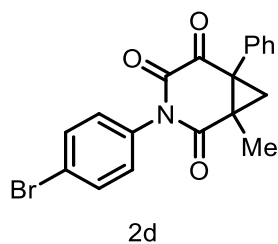

**3-(4-bromophenyl)-1-methyl-6-phenyl-3-azabicyclo[4.1.0]heptane-2,4,5-trione (2d):**

Purification by silica gel chromatography (PE:EA=85:15) afforded the desired **2d** as brown solid in 75% yield (99.69 mg);  $^1\text{H-NMR}$  (400 MHz,  $\text{CDCl}_3$ )  $\delta$  7.64-7.60 (m, 2H), 7.47-7.43 (m, 3H), 7.25-7.22 (m, 2H), 7.07-7.03 (m, 2H), 2.54 (d,  $J = 6.0$  Hz, 1H), 2.22 (d,  $J = 6.0$  Hz, 1H), 1.27 (s, 3H);  $^{13}\text{C-NMR}$  (100 MHz,  $\text{CDCl}_3$ )  $\delta$  186.3, 171.9, 158.5, 132.8, 132.7, 130.6, 129.6, 129.1, 129.0, 123.3, 45.8, 35.2, 29.1, 16.2; **MS** (ESI)  $m/z$  384  $[\text{M}+\text{H}]^+$ ; HRMS Calculated for  $\text{C}_{19}\text{H}_{15}\text{BrNO}_3^+$  384.0230; Found: 384.0208.  $[\text{M}+\text{H}]^+$ .

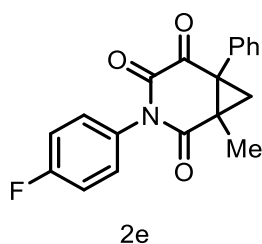

**3-(4-fluorophenyl)-1-methyl-6-phenyl-3-azabicyclo[4.1.0]heptane-2,4,5-trione (2e):**

Purification by silica gel chromatography (PE:EA=80:20) afforded the desired **2e** as white solid in 70% yield (78.3 mg); **<sup>1</sup>H-NMR** (400 MHz, CDCl<sub>3</sub>) δ 7.46-7.43 (m, 3H), 7.25-7.23 (m, 2H), 7.20-7.14 (m, 4H), 2.53 (d, *J* = 6.2 Hz, 1H), 2.22 (d, *J* = 6.2 Hz, 1H), 1.24-1.28 (s, 3H); **<sup>13</sup>C-NMR** (100 MHz, CDCl<sub>3</sub>) δ 186.4, 172.1, 160.1 (d, *J*<sub>C-F</sub> = 266.4 Hz, 1C), 130.6, 130.1, 129.7 (d, *J*<sub>C-F</sub> = 8.7 Hz, 1C), 129.1, 129.0, 128.5, 116.6 (d, *J*<sub>C-F</sub> = 23 Hz, 1C), 45.8, 35.2, 29.1, 16.2; **<sup>19</sup>F NMR** (376 MHz, CDCl<sub>3</sub>) δ -111.5 (s, 1F) **MS** (ESI) *m/z* 324 [M+H]<sup>+</sup>; HRMS Calculated for C<sub>19</sub>H<sub>15</sub>FNO<sub>3</sub><sup>+</sup> 324.1030; Found: 324.1009. [M+H]<sup>+</sup>.

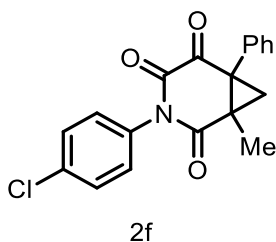

**3-(4-chlorophenyl)-1-methyl-6-phenyl-3-azabicyclo[4.1.0]heptane-2,4,5-trione (2f):**

Purification by silica gel chromatography (PE:EA=85:15) afforded the desired **2f** as white solid in 82% yield (96.39 mg); **<sup>1</sup>H-NMR** (400 MHz, CDCl<sub>3</sub>) δ 7.45-7.42 (m, 5H), 7.23-7.21 (m, 2H), 7.10 (d, *J* = 8.7 Hz, 2H), 2.55 (d, *J* = 6.0 Hz, 1H), 2.19 (d, *J* = 6.0 Hz, 1H), 1.25 (s, 3H); **<sup>13</sup>C-NMR** (100 MHz, CDCl<sub>3</sub>) δ 186.4, 172.0, 158.5, 135.2, 132.3, 130.6, 129.7, 129.3, 129.0, 129.0, 45.8, 35.2, 29.7, 29.1, 16.2; **MS** (ESI) *m/z* 340 [M+H]<sup>+</sup>; HRMS Calculated for C<sub>19</sub>H<sub>15</sub>ClNO<sub>3</sub><sup>+</sup> 340.0735; Found: 340.0748. [M+H]<sup>+</sup>.

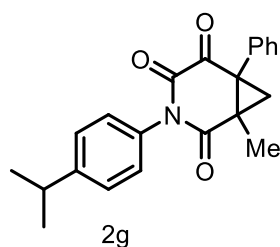

**3-(4-isopropylphenyl)-1-methyl-6-phenyl-3-azabicyclo[4.1.0]heptane-2,4,5-trione (2g):**

Purification by silica gel chromatography (PE:EA=83:17) afforded the desired **2g** as white solid in 73% yield (87.73 mg); **<sup>1</sup>H-NMR** (400 MHz, CDCl<sub>3</sub>) δ 7.49-7.45 (m, 3H), 7.37 (d, *J* = 8.3 Hz, 2H), 7.29-7.26 (m, 2H), 7.10 (d, *J* = 8.3 Hz, 2H), 3.02-2.95 (m, 1H), 2.57 (d, *J* = 6.0 Hz, 1H), 2.24 (d, *J* = 6.0 Hz, 1H), 1.30 (d, *J* = 7.0 Hz, 6H), 0.91 (t, *J* = 7.0 Hz, 3H); **<sup>13</sup>C-NMR** (100 MHz, CDCl<sub>3</sub>) δ 207.1, 186.8, 172.4, 158.9, 149.9, 131.5, 130.9, 130.7, 129.0, 127.6, 127.5, 45.8, 33.9, 31.0, 29.1, 23.9, 16.3, 14.2; **MS** (ESI) *m/z* 255 [M+H]<sup>+</sup>; HRMS Calculated for C<sub>22</sub>H<sub>22</sub>NO<sub>3</sub><sup>+</sup> 348.1594; Found: 348.1589. [M+H]<sup>+</sup>.

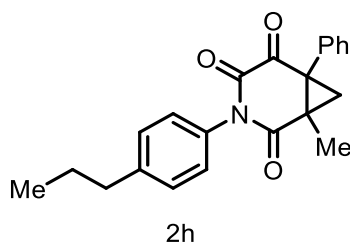

**1-methyl-6-phenyl-3-(4-propylphenyl)-3-azabicyclo[4.1.0]heptane-2,4,5-trione (2h):**

Purification by silica gel chromatography (PE:EA=85:15) afforded the desired **2h** as white solid in 81% yield (97.66 mg); **<sup>1</sup>H-NMR** (400 MHz, CDCl<sub>3</sub>) δ 7.37-7.33 (m, 3H), 7.21 (s, 1H), 7.19 (s, 1H), 7.17-7.14 (m, 2H), 6.99-6.96 (m, 2H), 2.57-2.53 (m, 2H), 2.46 (d, *J* = 6.0 Hz, 1H), 2.11 (d, *J* = 6.2 Hz, 1H), 1.62-1.55 (m, 2H), 1.17 (s, 3H), 0.89 (t, *J* = 7.4 Hz, 3H); **<sup>13</sup>C-NMR** (100 MHz, CDCl<sub>3</sub>) δ 186.7, 172.2, 158.8, 143.8, 131.4, 130.8, 130.6, 129.4, 128.9, 127.4, 45.7, 37.6, 35.1, 29.0, 24.2, 16.1, 13.8; **MS** (ESI) *m/z* 348 [M+H]<sup>+</sup>; HRMS Calculated for C<sub>22</sub>H<sub>22</sub>NO<sub>3</sub><sup>+</sup> 348.1594; Found: 348.1578. [M+H]<sup>+</sup>.

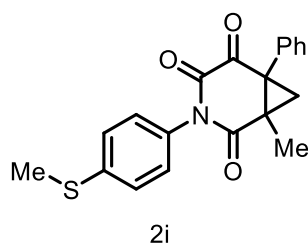

**1-methyl-3-(4-(methylthio)phenyl)-6-phenyl-3-azabicyclo[4.1.0]heptane-2,4,5-trione (2i):**

Purification by silica gel chromatography (PE:EA=85:15) afforded the desired **2i** as brown solid in 78% yield (94.83 mg); <sup>1</sup>H-NMR (400 MHz, CDCl<sub>3</sub>) δ 7.47-7.43 (m, 3H), 7.35-7.32 (m, 2H), 7.26-7.23 (m, 2H), 7.10-7.06 (m, 2H), 2.54 (d, *J* = 6.0 Hz, 1H), 2.51 (s, 3H), 2.22 (d, *J* = 6.0 Hz, 1H), 1.27 (s, 3H); <sup>13</sup>C-NMR (100 MHz, CDCl<sub>3</sub>) δ 186.6, 172.2, 158.8, 140.5, 130.7, 130.6, 130.6, 129.0, 128.1, 126.9, 45.8, 35.2, 29.1, 16.2, 15.5; MS (ESI) *m/z* 255 [M+H]<sup>+</sup>; HRMS Calculated for C<sub>20</sub>H<sub>18</sub>NO<sub>3</sub>S<sup>+</sup> 352.1002; Found: 352.0992. [M+H]<sup>+</sup>.

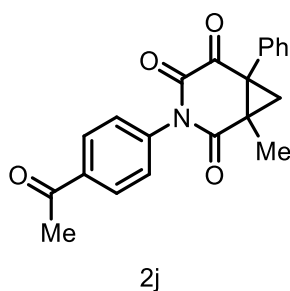

**3-(4-acetylphenyl)-1-methyl-6-phenyl-3-azabicyclo[4.1.0]heptane-2,4,5-trione (2j):**

Purification by silica gel chromatography (PE:EA=80:20) afforded the desired **2j** as colourless oil in 69% yield (82.92 mg); <sup>1</sup>H-NMR (400 MHz, CDCl<sub>3</sub>) δ 8.02-7.99 (m, 2H), 7.40-7.36 (m, 3H), 7.23-7.20 (m, 2H), 7.19-7.17 (m, 2H), 2.57 (s, 3H), 2.49 (d, *J* = 6.2 Hz, 1H), 2.18 (d, *J* = 6.0 Hz, 1H), 1.21 (s, 3H); <sup>13</sup>C-NMR (100 MHz, CDCl<sub>3</sub>) δ 196.9, 186.2, 171.9, 158.4, 138.0, 137.5, 130.6, 130.6, 129.5, 129.1, 129.0, 128.3, 45.9, 35.3, 29.1, 26.7, 16.2; MS (ESI) *m/z* 255 [M+H]<sup>+</sup>; HRMS Calculated for C<sub>21</sub>H<sub>18</sub>NO<sub>4</sub><sup>+</sup> 348.1230; Found: 348.1223. [M+H]<sup>+</sup>.

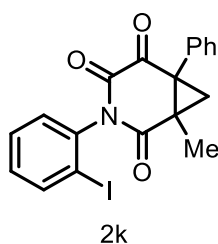

**3-(2-iodophenyl)-1-methyl-6-phenyl-3-azabicyclo[4.1.0]heptane-2,4,5-trione (2k):**

Purification by silica gel chromatography (PE:EA=85:15) afforded the desired **2k** as white solid in 80% yield (119.35 mg); <sup>1</sup>H-NMR (400 MHz, CDCl<sub>3</sub>) δ 7.88 (dd, *J* = 7.8, 1.2 Hz, 1H), 7.44-7.36 (m, 4H), 7.21-7.18 (m, 2H), 7.14-7.10 (m, 2H), 3.06 (d, *J* = 6.2 Hz, 1H), 2.19 (d, *J* = 6.0 Hz, 1H), 1.24 (s, 3H); <sup>13</sup>C-NMR (100 MHz, CDCl<sub>3</sub>) δ 186.2, 171.0, 157.8, 139.9, 137.2, 131.0, 131.0, 130.6, 129.9, 129.6, 129.0, 97.3, 46.2, 35.7, 29.3, 16.3; MS (ESI) *m/z* 432 [M+H]<sup>+</sup>; HRMS Calculated for C<sub>19</sub>H<sub>15</sub>INO<sub>3</sub><sup>+</sup> 432.0091; Found: 432.0083. [M+H]<sup>+</sup>.

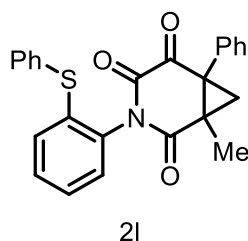

**1-methyl-6-phenyl-3-(2-(phenylthio)phenyl)-3-azabicyclo[4.1.0]heptane-2,4,5-trione (2l):**

Purification by silica gel chromatography (PE:EA=80:20) afforded the desired **2l** as white solid in 67% yield (95.85 mg); <sup>1</sup>H-NMR (400 MHz, CDCl<sub>3</sub>) δ 7.47-7.42 (m, 4H), 7.40 (d, *J* = 3.8 Hz, 2H), 7.35-7.34 (m, 4H), 7.32-7.25 (m, 4H), 2.95 (d, *J* = 5.9 Hz, 1H), 2.20 (d, *J* = 6.0 Hz, 1H), 1.28 (s, 3H); <sup>13</sup>C-NMR (100 MHz, CDCl<sub>3</sub>) δ 186.8, 171.8, 158.4, 134.8, 134.4, 134.3, 133.8, 131.2, 131.1, 130.7, 130.4, 129.7, 129.5, 129.0, 128.8, 127.6, 46.2, 35.6, 29.3, 16.2; MS (ESI) *m/z* 255 [M+H]<sup>+</sup>; HRMS Calculated for C<sub>25</sub>H<sub>20</sub>NO<sub>3</sub>S<sup>+</sup> 414.1158; Found: 414.1159. [M+H]<sup>+</sup>.

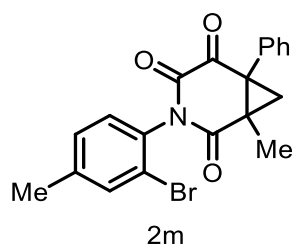

**3-(2-bromo-4-methylphenyl)-1-methyl-6-phenyl-3-azabicyclo[4.1.0]heptane-2,4,5-trione**

**(2m):** Purification by silica gel chromatography (PE:EA=85:15) afforded the desired **2m** as white solid in 74% yield (106.22 mg); <sup>1</sup>H-NMR (400 MHz, CDCl<sub>3</sub>) δ 7.56 (d, *J* = 6.8 Hz, 1H), 7.50-7.45 (m, 3H), 7.29-7.26 (m, 3H), 7.13 (d, *J* = 8.0 Hz, 1H), 2.95 (d, *J* = 6.0 Hz, 1H), 2.42 (s, 3H), 2.26 (d, *J* = 6.0 Hz, 1H), 1.30 (s, 3H); <sup>13</sup>C-NMR (100 MHz, CDCl<sub>3</sub>) δ 186.5, 171.3, 158.0, 141.7, 133.9, 131.0, 130.7, 130.0, 129.5, 129.0, 121.6, 46.1, 35.5, 29.2, 21.0, 16.2; **MS** (ESI) *m/z* 398 [M+H]<sup>+</sup>; HRMS Calculated for C<sub>20</sub>H<sub>17</sub>BrNO<sub>3</sub><sup>+</sup> 398.0386; Found: 398.0400. [M+H]<sup>+</sup>.

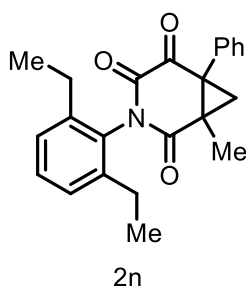

**3-(2-bromo-4-methylphenyl)-1-methyl-6-phenyl-3-azabicyclo[4.1.0]heptane-2,4,5-trione**

**(2n):** Purification by silica gel chromatography (PE:EA=85:15) afforded the desired **2n** as white solid in 76% yield (97.78 mg); <sup>1</sup>H-NMR (400 MHz, CDCl<sub>3</sub>) δ 7.51-7.46 (m, 3H), 7.41 (t, *J* = 7.6 Hz, 1H), 7.30-7.23 (m, 4H), 2.60 (d, *J* = 6.0 Hz, 1H), 2.56-2.46 (m, 2H), 2.44-2.32 (m, 2H), 2.29 (d, *J* = 6.0 Hz, 1H), 1.32 (s, 3H), 1.24 (t, *J* = 7.6 Hz, 3H), 1.20 (t, *J* = 7.6 Hz, 3H); <sup>13</sup>C-NMR (100 MHz, CDCl<sub>3</sub>) δ 186.5, 171.3, 158.0, 141.7, 133.9, 131.0, 130.7, 130.0, 129.5, 129.0, 121.6, 46.1, 35.5, 29.2, 21.0, 16.2; **MS** (ESI) *m/z* 362 [M+H]<sup>+</sup>; HRMS Calculated for C<sub>23</sub>H<sub>24</sub>NO<sub>3</sub><sup>+</sup> 362.1751; Found: 362.1768. [M+H]<sup>+</sup>.

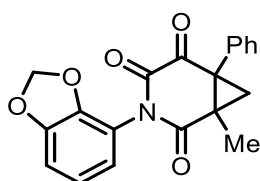

2o

**3-(benzo[*d*][1,3]dioxol-4-yl)-1-methyl-6-phenyl-3-azabicyclo[4.1.0]heptane-2,4,5-trione**

**(2o):** Purification by silica gel chromatography (PE:EA=85:15) afforded the desired **2o** as white solid in 80% yield (96.6 mg); **<sup>1</sup>H-NMR** (400 MHz, CDCl<sub>3</sub>) δ 7.46 (d, *J* = 7.0 Hz, 3H), 7.29-7.26 (m, 3H), 6.94 (q, *J* = 7.9 Hz, 2H), 6.04 (d, *J* = 6.0 Hz, 2H), 2.60 (d, *J* = 6.0 Hz, 1H), 2.24 (d, *J* = 5.8 Hz, 1H), 1.30 (s, 3H); **<sup>13</sup>C-NMR** (100 MHz, CDCl<sub>3</sub>) δ 186.6, 171.4, 148.9, 130.8, 130.7, 129.1, 129.0, 122.1, 121.5, 109.5, 102.0, 45.9, 35.3, 29.3, 16.2; **MS** (ESI) *m/z* 350 [M+H]<sup>+</sup>; HRMS Calculated for C<sub>20</sub>H<sub>16</sub>NO<sub>5</sub><sup>+</sup> 350.1023; Found: 350.1020. [M+H]<sup>+</sup>.

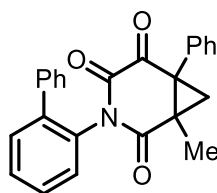

2p

**3-([1,1'-biphenyl]-2-yl)-1-methyl-6-phenyl-3-azabicyclo[4.1.0]heptane-2,4,5-trione (2p):**

Purification by silica gel chromatography (PE:EA=85:15) afforded the desired **2p** as white solid in 60% yield (79.18 mg); **<sup>1</sup>H-NMR** (400 MHz, CDCl<sub>3</sub>) δ 7.66 (d, *J* = 8.0 Hz, 1H), 7.58-7.52 (m, 3H), 7.45-7.41 (m, 5H), 7.37-7.34 (m, 2H), 7.26-7.23 (m, 2H), 7.13 (s, 1H), 2.58 (d, *J* = 6.0 Hz, 1H), 2.23 (d, *J* = 6.0 Hz, 1H), 1.27 (s, 3H); **<sup>13</sup>C-NMR** (100 MHz, CDCl<sub>3</sub>) δ 186.7, 172.3, 158.8, 142.9, 139.9, 134.4, 130.8, 130.7, 129.9, 129.1, 129.0, 128.9, 128.0, 127.8, 127.3, 126.7, 126.5, 45.9, 35.3, 29.2, 16.3; **MS** (ESI) *m/z* 382 [M+H]<sup>+</sup>; HRMS Calculated for C<sub>25</sub>H<sub>20</sub>NO<sub>3</sub><sup>+</sup> 382.1438; Found: 382.1440. [M+H]<sup>+</sup>.

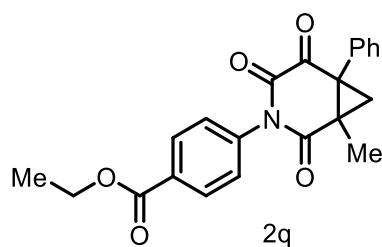

**ethyl 4-(1-methyl-2,4,5-trioxo-6-phenyl-3-azabicyclo[4.1.0]heptan-3-yl)benzoate (2q):**

Purification by silica gel chromatography (PE:EA=85:15) afforded the desired **2q** as white solid in 65% yield (84.87 mg); **<sup>1</sup>H-NMR** (400 MHz, CDCl<sub>3</sub>) δ 8.17 (d, *J* = 8.8 Hz, 2H), 7.78 (d, *J* = 8.5 Hz, 1H), 7.66 (d, *J* = 7.0 Hz, 1H), 7.52-7.44 (m, 3H), 7.36 (t, *J* = 7.8 Hz, 1H), 7.24 (s, 1H), 4.43-4.35 (m, 2H), 2.56 (d, *J* = 6.3 Hz, 1H), 2.25 (d, *J* = 6.3 Hz, 1H), 1.40 (t, *J* = 7.1 Hz, 3H), 1.28 (s, 3H); **<sup>13</sup>C-NMR** (100 MHz, CDCl<sub>3</sub>) δ 207.2, 186.3, 171.8, 165.5, 137.7, 130.8, 130.7, 129.1, 129.0, 128.2, 128.1, 128.0, 122.8, 61.3, 35.3, 30.1, 29.0, 16.3, 14.1; **MS** (ESI) *m/z* 255 [M+H]<sup>+</sup>; HRMS Calculated for C<sub>22</sub>H<sub>20</sub>NO<sub>5</sub><sup>+</sup> 378.1336; Found: 378.1327. [M+H]<sup>+</sup>.

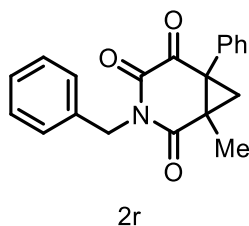

**3-benzyl-1-methyl-6-phenyl-3-azabicyclo[4.1.0]heptane-2,4,5-trione (2r):** Purification by silica gel chromatography (PE:EA=85:15) afforded the desired **2r** as white solid in 78% yield (90.73 mg); **<sup>1</sup>H-NMR** (400 MHz, CDCl<sub>3</sub>) δ 7.44-7.41 (m, 2H), 7.40-7.37 (m, 3H), 7.36-7.29 (m, 3H), 7.17-7.14 (m, 2H), 5.05 (d, *J* = 13.7 Hz, 1H), 4.94 (d, *J* = 13.6 Hz, 1H), 2.17 (d, *J* = 6.2 Hz, 1H), 2.02 (d, *J* = 5.9 Hz, 1H), 1.21 (s, 3H); **<sup>13</sup>C-NMR** (100 MHz, CDCl<sub>3</sub>) δ 186.3, 171.9, 158.7, 135.8, 133.1, 131.0, 130.9, 130.5, 129.2, 128.9, 128.6, 128.5, 128.0, 127.7, 127.6, 45.5, 44.8, 34.8, 28.9, 16.1; **MS** (ESI) *m/z* 320 [M+H]<sup>+</sup>; HRMS Calculated for C<sub>20</sub>H<sub>18</sub>NO<sub>3</sub><sup>+</sup> 320.1281; Found: 320.1281. [M+H]<sup>+</sup>.



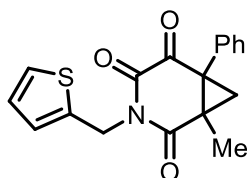

2s

**1-methyl-6-phenyl-3-(thiophen-3-ylmethyl)-3-azabicyclo[4.1.0]heptane-2,4,5-trione (2s):**

Purification by silica gel chromatography (PE:EA=85:15) afforded the desired **2s** as yellow solid in 70% yield (78.80 mg); **<sup>1</sup>H-NMR** (400 MHz, CDCl<sub>3</sub>) δ 7.42-7.39 (m, 4H), 7.17-7.14 (m, 3H), 6.96 (dd, *J* = 5.1, 3.6 Hz, 1H), 5.27 (d, *J* = 14.3 Hz, 1H), 5.09 (d, *J* = 14.3 Hz, 1H), 2.17 (d, *J* = 5.9 Hz, 1H), 2.04 (d, *J* = 5.9 Hz, 1H), 1.24 (s, 3H); **<sup>13</sup>C-NMR** (100 MHz, CDCl<sub>3</sub>) δ 186.2, 171.7, 158.2, 148.7, 142.5, 131.0, 130.6, 128.9, 110.5, 109.7, 45.6, 37.5, 34.8, 29.0, 16.0; **MS** (ESI) *m/z* 326 [M+H]<sup>+</sup>; HRMS Calculated for C<sub>18</sub>H<sub>16</sub>NO<sub>3</sub>S<sup>+</sup> 326.0845; Found: 326.0851. [M+H]<sup>+</sup>.

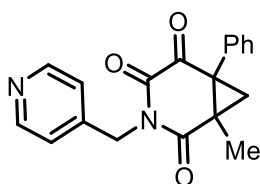

2t

**3-(2-bromo-4-methylphenyl)-1-methyl-6-phenyl-3-azabicyclo[4.1.0]heptane-2,4,5-trione**

**(2t):** Purification by silica gel chromatography (PE:EA=85:15) afforded the desired **2t** as white solid in 71% yield (3.56 g); **<sup>1</sup>H-NMR** (400 MHz, CDCl<sub>3</sub>) δ 8.53-8.44 (m, 2H), 7.55-7.52 (m, 1H), 7.36 (dd, *J* = 4.5, 1.6 Hz, 1H), 7.32-7.21 (m, 4H), 7.06 (dd, *J* = 4.5, 1.6 Hz, 1H), 5.38-5.31 (m, 2H), 1.97 (d, *J* = 5.9 Hz, 1H), 1.23 (m, 4H); **<sup>13</sup>C-NMR** (100 MHz, CDCl<sub>3</sub>) δ 186.8, 171.6, 158.4, 140.5, 137.8, 131.7, 131.6, 131.3, 130.6, 130.2, 129.6, 47.1, 46.9, 36.3, 29.9, 16.9; **MS** (ESI) *m/z* 321 [M+H]<sup>+</sup>; HRMS Calculated for C<sub>19</sub>H<sub>17</sub>N<sub>2</sub>O<sub>3</sub><sup>+</sup> 321.1234; Found: 321.1227. [M+H]<sup>+</sup>.

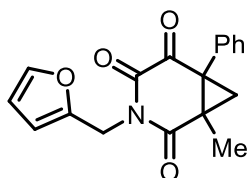

2u

**3-(furan-3-ylmethyl)-1-methyl-6-phenyl-3-azabicyclo[4.1.0]heptane-2,4,5-trione (2u):**

Purification by silica gel chromatography (PE:EA=85:15) afforded the desired **2u** as white solid in 73% yield (78.07 mg); <sup>1</sup>H-NMR (400 MHz, CDCl<sub>3</sub>) δ 7.42-7.39 (m, 3H), 7.26-7.25 (m, 3H), 7.17-7.15 (m, 2H), 6.96 (dd, *J* = 5.2, 3.5 Hz, 1H), 5.27 (d, *J* = 14.3 Hz, 1H), 5.09 (d, *J* = 14.3 Hz, 1H), 2.18 (d, *J* = 5.9 Hz, 1H), 2.04 (d, *J* = 5.9 Hz, 1H), 1.24 (s, 3H); <sup>13</sup>C-NMR (100 MHz, CDCl<sub>3</sub>) δ 186.1, 171.7, 158.2, 148.7, 142.5, 130.9, 130.6, 129.0, 110.6, 109.7, 45.6, 37.5, 34.8, 29.1, 16.1; **MS** (ESI) *m/z* 310 [M+H]<sup>+</sup>; HRMS Calculated for C<sub>18</sub>H<sub>16</sub>NO<sub>4</sub><sup>+</sup> 310.1074; Found: 310.1080. [M+H]<sup>+</sup>.

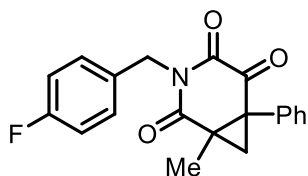

2v

**3-(4-fluorobenzyl)-1-methyl-6-phenyl-3-azabicyclo[4.1.0]heptane-2,4,5-trione (2v):**

Purification by silica gel chromatography (PE:EA=85:15) afforded the desired **2v** as white solid in 74% yield (86.36 mg); <sup>1</sup>H-NMR (400 MHz, CDCl<sub>3</sub>) δ 7.46-7.39 (m, 5H), 7.17-7.15 (m, 2H), 7.05-6.99 (m, 2H), 5.02 (d, *J* = 13.7 Hz, 1H), 4.91 (d, *J* = 13.7 Hz, 1H), 2.15 (d, *J* = 5.9 Hz, 1H), 2.04 (d, *J* = 5.9 Hz, 1H), 1.22 (s, 3H); <sup>13</sup>C-NMR (100 MHz, CDCl<sub>3</sub>) δ 186.2, 171.9, 162.5 (d, *J*<sub>C-F</sub> = 245.3 Hz, 1C), 158.7, 131.6, 131.4 (d, *J*<sub>C-F</sub> = 8.6 Hz, 1C), 130.8, 130.5, 129.0, 115.6 (d, *J*<sub>C-F</sub> = 22 Hz, 1C), 45.5, 44.1, 34.8, 29.7, 29.0, 16.1; <sup>19</sup>F NMR (376 MHz, CDCl<sub>3</sub>) δ -111.5 (s, 1F); **MS** (ESI) *m/z* 338 [M+H]<sup>+</sup>; HRMS Calculated for C<sub>20</sub>H<sub>17</sub>FNO<sub>3</sub><sup>+</sup> 338.1187; Found: 338.1179. [M+H]<sup>+</sup>.

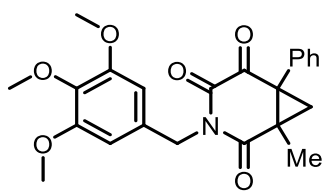

2w

**3-(4-fluorobenzyl)-1-methyl-6-phenyl-3-azabicyclo[4.1.0]heptane-2,4,5-trione (2w):**

Purification by silica gel chromatography (PE:EA=85:15) afforded the desired **2w** as white solid in 68% yield (96.32 mg); **<sup>1</sup>H-NMR** (400 MHz, CDCl<sub>3</sub>) δ 7.43-7.38 (m, 3H), 7.16 (dd, *J* = 4.3, 3.2 Hz, 2H), 6.70 (s, 2H), 4.96 (d, *J* = 13.5 Hz, 1H), 4.87 (d, *J* = 13.5 Hz, 1H), 3.85 (d, *J* = 3.7 Hz, 6H), 3.83 (d, *J* = 2.7 Hz, 3H), 2.17 (d, *J* = 5.8 Hz, 1H), 2.05 (d, *J* = 5.9 Hz, 1H), 1.22 (s, 3H); **<sup>13</sup>C-NMR** (100 MHz, CDCl<sub>3</sub>) δ 186.3, 171.9, 158.7, 153.4, 153.1, 137.7, 131.3, 130.8, 130.5, 128.9, 128.5, 128.5, 106.7, 104.5, 60.8, 56.1, 45.5, 45.0, 43.9, 34.8, 29.0, 16.1; **MS** (ESI) *m/z* 255 [M+H]<sup>+</sup>; HRMS Calculated for C<sub>23</sub>H<sub>24</sub>NO<sub>6</sub><sup>+</sup> 410.1598; Found: 410.1594 [M+H]<sup>+</sup>.

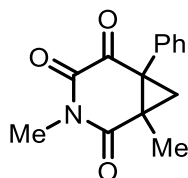

2x

**1,3-dimethyl-6-phenyl-3-azabicyclo[4.1.0]heptane-2,4,5-trione (2x):**

Purification by silica gel chromatography (PE:EA=85:15) afforded the desired **2x** as white solid in 78% yield (65.65 mg); **<sup>1</sup>H-NMR** (400 MHz, CDCl<sub>3</sub>) δ 7.44-7.40 (m, 3H), 7.19-7.16 (m, 2H), 3.27 (s, 3H), 2.28 (d, *J* = 5.9 Hz, 1H), 2.09 (d, *J* = 5.9 Hz, 1H), 1.23 (s, 3H); **<sup>13</sup>C-NMR** (100 MHz, CDCl<sub>3</sub>) δ 186.1, 172.3, 158.9, 130.9, 130.5, 128.9, 45.4, 34.7, 29.2, 28.1, 16.2; **MS** (ESI) *m/z* 244 [M+H]<sup>+</sup>; HRMS Calculated for C<sub>14</sub>H<sub>14</sub>NO<sub>3</sub><sup>+</sup> 244.0968; Found: 244.0978. [M+H]<sup>+</sup>.

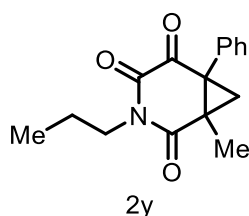

**1-methyl-6-phenyl-3-propyl-3-azabicyclo[4.1.0]heptane-2,4,5-trione (2y):** Purification by silica gel chromatography (PE:EA=85:15) afforded the desired **2y** as white solid in 78% yield (73.21 mg); **<sup>1</sup>H-NMR** (400 MHz, CDCl<sub>3</sub>) δ 7.64-7.62 (m, 1H), 7.43-7.39 (m, 3H), 7.19-7.17 (m, 1H), 2.24 (d, *J* = 5.8 Hz, 1H), 2.08 (d, *J* = 5.9 Hz, 1H), 1.70-1.59 (m, 4H), 1.23 (s, 3H), 1.00-0.93 (m, 3H); **<sup>13</sup>C-NMR** (100 MHz, CDCl<sub>3</sub>) δ 186.5, 172.1, 158.8, 133.1, 131.1, 130.9, 130.6, 128.9, 128.7, 43.2, 34.7, 29.2, 22.2, 21.0, 16.2, 11.3; **MS** (ESI) *m/z* 272 [M+H]<sup>+</sup>; **HRMS** Calculated for C<sub>16</sub>H<sub>18</sub>NO<sub>3</sub><sup>+</sup> 272.1281; Found: 272.1296. [M+H]<sup>+</sup>.

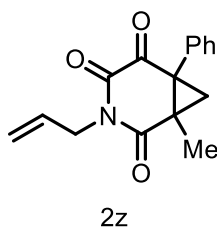

**1,3-dimethyl-6-phenyl-3-azabicyclo[4.1.0]heptane-2,4,5-trione (2z):** Purification by silica gel chromatography (PE:EA=85:15) afforded the desired **2z** as white solid in 73% yield (68.01 mg); **<sup>1</sup>H-NMR** (400 MHz, CDCl<sub>3</sub>) δ 7.43-7.40 (m, 3H), 7.19-7.16 (m, 2H), 5.89-5.79 (m, 1H), 5.33-5.23 (m, 2H), 4.51 (dd, *J* = 14.2, 6.5 Hz, 1H), 4.36 (dd, *J* = 15.4, 5.8 Hz, 1H), 2.27 (d, *J* = 5.9 Hz, 1H), 2.09 (d, *J* = 5.9 Hz, 1H), 1.23 (s, 3H); **<sup>13</sup>C-NMR** (100 MHz, CDCl<sub>3</sub>) δ 186.3, 171.7, 158.4, 130.9, 130.7, 130.6, 128.9, 119.6, 45.5, 43.7, 34.8, 29.1, 16.1; **MS** (ESI) *m/z* 255 [M+H]<sup>+</sup>; **HRMS** Calculated for C<sub>16</sub>H<sub>16</sub>NO<sub>3</sub><sup>+</sup> 270.1125; Found: 270.1117. [M+H]<sup>+</sup>.

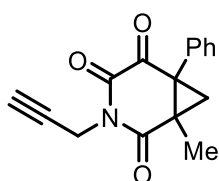

2aa

**1-methyl-6-phenyl-3-(prop-2-yn-1-yl)-3-azabicyclo[4.1.0]heptane-2,4,5-trione (2aa):**

Purification by silica gel chromatography (PE:EA=85:15) afforded the desired **2aa** as brown solid in 72% yield (66.57 mg); <sup>1</sup>H-NMR (400 MHz, CDCl<sub>3</sub>) δ 7.42-7.39 (m, 3H), 7.18-7.16 (m, 2H), 4.64 (dd, *J* = 16.6, 2.5 Hz, 1H), 4.53 (dd, *J* = 16.5, 2.5 Hz, 1H), 2.31 (d, *J* = 6.0 Hz, 1H), 2.23 (t, *J* = 2.5 Hz, 1H), 2.11 (d, *J* = 6.0 Hz, 1H), 1.24 (s, 3H); <sup>13</sup>C-NMR (100 MHz, CDCl<sub>3</sub>) δ 185.7, 171.1, 157.5, 130.7, 130.5, 128.9, 76.9, 71.7, 45.6, 34.8, 30.6, 29.0, 16.0; MS (ESI) *m/z* 255 [M+H]<sup>+</sup>; HRMS Calculated for C<sub>16</sub>H<sub>14</sub>NO<sub>3</sub><sup>+</sup> 268.0968; Found: 268.0971. [M+H]<sup>+</sup>.

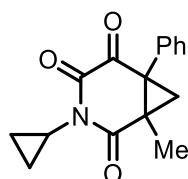

2ab

**3-cyclopropyl-1-methyl-6-phenyl-3-azabicyclo[4.1.0]heptane-2,4,5-trione (2ab):**

Purification by silica gel chromatography (PE:EA=85:15) afforded the desired **2ab** as white solid in 68% yield (63.35 mg); <sup>1</sup>H-NMR (400 MHz, CDCl<sub>3</sub>) δ 7.44-7.39 (m, 3H), 7.18-7.15 (m, 2H), 2.74-2.68 (m, 1H), 2.18 (d, *J* = 5.9 Hz, 1H), 2.07 (d, *J* = 5.9 Hz, 1H), 1.25-1.15 (m, 4H), 1.12-1.05 (m, 1H), 0.91-0.83 (m, 1H), 0.66-0.59 (m, 1H); <sup>13</sup>C-NMR (100 MHz, CDCl<sub>3</sub>) δ 186.3, 173.0, 159.4, 131.0, 130.5, 128.9, 45.8, 35.0, 29.1, 25.3, 16.0, 9.0, 7.1; MS (ESI) *m/z* 270 [M+H]<sup>+</sup>; HRMS Calculated for C<sub>16</sub>H<sub>16</sub>NO<sub>3</sub><sup>+</sup> 270.1125; Found: 270.1133. [M+H]<sup>+</sup>.

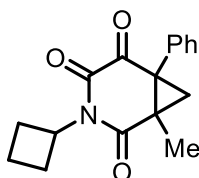

2ac

**3-cyclobutyl-1-methyl-6-phenyl-3-azabicyclo[4.1.0]heptane-2,4,5-trione (2ac):**

Purification by silica gel chromatography (PE:EA=85:15) afforded the desired **2ac** as white solid in 65% yield (63.71 mg); **<sup>1</sup>H-NMR** (400 MHz, CDCl<sub>3</sub>) δ 7.42-7.38 (m, 3H), 7.18-7.15 (m, 2H), 4.92-4.83 (m, 1H), 2.70-2.59 (m, 2H), 2.35-2.29 (m, 3H), 2.08 (d, *J* = 5.9 Hz, 1H), 1.92-1.85 (m, 1H), 1.82-1.74 (m, 1H), 1.20 (s, 3H); **<sup>13</sup>C-NMR** (100 MHz, CDCl<sub>3</sub>) δ 186.7, 172.6, 159.0, 132.0, 130.6, 130.1, 128.9, 128.8, 49.2, 45.6, 35.1, 29.2, 28.7, 27.7, 16.1, 15.4; **MS** (ESI) *m/z* 255 [M+H]<sup>+</sup>; HRMS Calculated for C<sub>17</sub>H<sub>18</sub>NO<sub>3</sub><sup>+</sup> 284.1281; Found: 284.1287. [M+H]<sup>+</sup>.

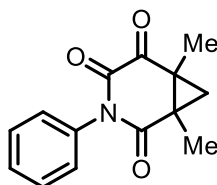

4a

**1,6-dimethyl-3-(*p*-tolyl)-3-azabicyclo[4.1.0]heptane-2,4,5-trione (4a):** Purification by silica gel chromatography (PE:EA=85:15) afforded the desired **4a** as white solid in 80% yield (67.33 mg); **<sup>1</sup>H-NMR** (400 MHz, CDCl<sub>3</sub>) δ 7.47-7.39 (m, 3H), 7.08-7.05 (m, 2H), 2.23 (d, *J* = 5.8 Hz, 1H), 1.57 (s, 3H), 1.55-1.53 (m, 4H); **<sup>13</sup>C-NMR** (100 MHz, CDCl<sub>3</sub>) δ 188.3, 172.5, 158.3, 133.9, 129.3, 129.0, 127.7, 36.0, 34.0, 31.2, 14.1, 12.2; **MS** (ESI) *m/z* 255 [M+H]<sup>+</sup>; HRMS Calculated for C<sub>14</sub>H<sub>14</sub>NO<sub>3</sub><sup>+</sup> 244.0968; Found: 244.0962. [M+H]<sup>+</sup>.

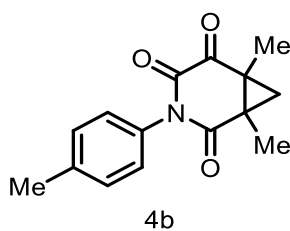

**1,6-dimethyl-3-(*p*-tolyl)-3-azabicyclo[4.1.0]heptane-2,4,5-trione (4b):** Purification by silica gel chromatography (PE:EA=85:15) afforded the desired **4b** as white solid in 83% yield (73.88 mg); **<sup>1</sup>H-NMR** (400 MHz, CDCl<sub>3</sub>) δ 7.18 (d, *J* = 7.6 Hz, 2H), 6.88 (d, *J* = 10.6 Hz, 2H), 2.31 (s, 3H), 2.15 (d, *J* = 5.8 Hz, 1H), 1.51 (s, 3H), 1.48 (d, *J* = 6.2 Hz, 4H); **<sup>13</sup>C-NMR** (100 MHz, CDCl<sub>3</sub>) δ 188.4, 172.5, 158.5, 139.1, 131.2, 130.0, 127.4, 36.0, 34.0, 31.2, 21.2, 14.2, 12.3; **MS** (ESI) *m/z* 255 [M+H]<sup>+</sup>; HRMS Calculated for C<sub>15</sub>H<sub>16</sub>NO<sub>3</sub><sup>+</sup> 258.1125; Found: 258.1120. [M+H]<sup>+</sup>.

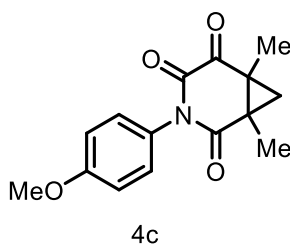

**3-(4-methoxyphenyl)-1,6-dimethyl-3-azabicyclo[4.1.0]heptane-2,4,5-trione (4c):** Purification by silica gel chromatography (PE:EA=85:15) afforded the desired **4c** as white solid in 78% yield (73.75 mg); **<sup>1</sup>H-NMR** (400 MHz, CDCl<sub>3</sub>) δ 7.01-6.94 (m, 4H), 3.81 (s, 3H), 2.21 (d, *J* = 5.8 Hz, 1H), 1.59 (s, 3H), 1.55 (d, *J* = 5.8 Hz, 4H); **<sup>13</sup>C-NMR** (100 MHz, CDCl<sub>3</sub>) δ 188.5, 172.7, 159.8, 158.8, 128.8, 126.5, 121.7, 114.7, 114.2, 55.5, 36.1, 34.0, 31.3, 14.3, 12.4; **MS** (ESI) *m/z* 274 [M+H]<sup>+</sup>; HRMS Calculated for C<sub>15</sub>H<sub>16</sub>NO<sub>4</sub><sup>+</sup> 274.1074; Found: 274.1076. [M+H]<sup>+</sup>.

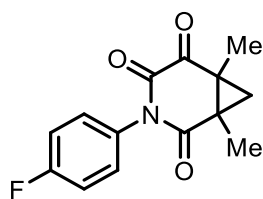

4d

**3-(4-methoxyphenyl)-1,6-dimethyl-3-azabicyclo[4.1.0]heptane-2,4,5-trione (4d):**

Purification by silica gel chromatography (PE:EA=85:15) afforded the desired **4d** as white solid in 80% yield (72.31 mg); <sup>1</sup>H-NMR (400 MHz, CDCl<sub>3</sub>) δ 7.17-7.11 (m, 2H), 7.08-7.04 (m, 2H), 2.22 (d, *J* = 5.8 Hz, 1H), 1.60 (s, 3H), 1.57 (d, *J* = 5.8 Hz, 1H), 1.55 (s, 3H); <sup>13</sup>C-NMR (100 MHz, CDCl<sub>3</sub>) δ 188.1, 172.5, 162.6 (d, *J*<sub>C-F</sub> = 247.0 Hz, 1C), 158.4, 129.7 (d, *J*<sub>C-F</sub> = 8.7 Hz, 1C), 129.6, 116.5 (d, *J*<sub>C-F</sub> = 22.4 Hz, 1C), 77.4, 36.2, 34.1, 31.3, 14.3, 12.4; <sup>19</sup>F NMR (376 MHz, CDCl<sub>3</sub>) δ -111.5 (s, 1F);s **MS** (ESI) *m/z* 255 [M+H]<sup>+</sup>; HRMS Calculated for C<sub>14</sub>H<sub>13</sub>FNO<sub>3</sub><sup>+</sup> 262.0874; Found: 262.0867. [M+H]<sup>+</sup>.

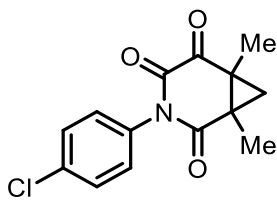

4e

**3-(4-chlorophenyl)-1,6-dimethyl-3-azabicyclo[4.1.0]heptane-2,4,5-trione (4e):**

Purification by silica gel chromatography (PE:EA=85:15) afforded the desired **4e** as white solid in 81% yield (77.82 mg); <sup>1</sup>H-NMR (400 MHz, CDCl<sub>3</sub>) δ 7.45-7.42 (m, 2H), 7.05-7.01 (m, 2H), 2.22 (d, *J* = 5.8 Hz, 1H), 1.61 (s, 3H), 1.58 (d, *J* = 5.8 Hz, 1H), 1.57 (s, 3H); <sup>13</sup>C-NMR (100 MHz, CDCl<sub>3</sub>) δ 188.0, 172.3, 158.2, 135.2, 132.3, 129.7, 129.2, 129.1, 36.2, 34.1,



31.3, 14.3, 12.4; **MS** (ESI)  $m/z$  278  $[M+H]^+$ ; HRMS Calculated for  $C_{14}H_{13}ClNO_3^+$  278.0578; Found: 278.0587.  $[M+H]^+$ .

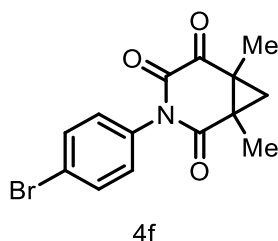

**3-(4-chlorophenyl)-1,6-dimethyl-3-azabicyclo[4.1.0]heptane-2,4,5-trione (4f)**: Purification by silica gel chromatography (PE:EA=85:15) afforded the desired **4f** as brown solid in 78% yield (86.93 mg);  **$^1H$ -NMR** (400 MHz,  $CDCl_3$ )  $\delta$  7.90-7.60 (m, 2H), 7.01-6.97 (m, 2H), 2.24 (d,  $J = 5.8$  Hz, 1H), 1.62 (s, 3H), 1.60 (d,  $J = 5.8$  Hz, 1H), 1.58 (s, 3H);  **$^{13}C$ -NMR** (100 MHz,  $CDCl_3$ )  $\delta$  188.0, 172.3, 158.2, 132.9, 132.7, 132.1, 129.6, 123.3, 36.2, 34.1, 31.3, 14.3, 12.4; **MS** (ESI)  $m/z$  322  $[M+H]^+$ ; HRMS Calculated for  $C_{14}H_{13}BrNO_3^+$  322.0073; Found: 322.0072.  $[M+H]^+$ .

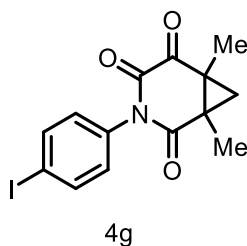

**3-(4-iodophenyl)-1,6-dimethyl-3-azabicyclo[4.1.0]heptane-2,4,5-trione (4g)**: Purification by silica gel chromatography (PE:EA=85:15) afforded the desired **4g** as white solid in 78% yield (102.17 mg);  **$^1H$ -NMR** (400 MHz,  $CDCl_3$ )  $\delta$  7.82 (d,  $J = 8.4$  Hz, 2H), 6.86 (d,  $J = 8.4$  Hz, 2H), 2.23 (d,  $J = 5.8$  Hz, 1H), 1.60 (s, 3H), 1.60 (d,  $J = 5.8$  Hz, 1H), 1.59 (s, 3H);  **$^{13}C$ -NMR** (100 MHz,  $CDCl_3$ )  $\delta$  188.0, 172.3, 158.2, 138.7, 138.0, 133.6, 129.7, 121.6, 95.0, 36.2, 34.1, 31.3, 14.3, 12.4; **MS** (ESI)  $m/z$  370  $[M+H]^+$ ; HRMS Calculated for  $C_{14}H_{13}INO_3^+$  369.9935; Found: 369.9934.  $[M+H]^+$ .

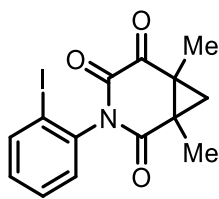

4h

**3-(4-iodophenyl)-1,6-dimethyl-3-azabicyclo[4.1.0]heptane-2,4,5-trione (4h):** Purification by silica gel chromatography (PE:EA=85:15) afforded the desired **4h** as white solid in 70% yield (99.6 mg); **<sup>1</sup>H-NMR** (400 MHz, CDCl<sub>3</sub>) δ 7.92 (dd, *J* = 8.0, 1.1 Hz, 1H), 7.47-7.43 (m, 1H), 7.18-7.09 (m, 2H), 2.84 (d, *J* = 5.8 Hz, 1H), 1.64 (s, 3H), 1.60 (d, *J* = 5.8 Hz, 1H), 1.59 (s, 3H); **<sup>13</sup>C-NMR** (100 MHz, CDCl<sub>3</sub>) δ 187.9, 171.3, 157.6, 139.9, 130.9, 129.9, 129.6, 121.6, 97.3, 36.5, 34.5, 31.5, 14.5, 12.7; **MS** (ESI) *m/z* 370 [M+H]<sup>+</sup>; HRMS Calculated for C<sub>14</sub>H<sub>13</sub>INO<sub>3</sub><sup>+</sup> 369.9935; Found: 369.9946. [M+H]<sup>+</sup>.

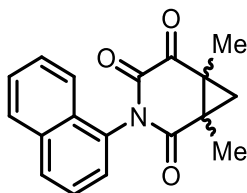

4i

**1,6-dimethyl-3-(naphthalen-1-yl)-3-azabicyclo[4.1.0]heptane-2,4,5-trione (*dr*: 1:1) (4i):** Purification by silica gel chromatography (PE:EA=85:15) afforded the desired **4i** as white solid in 75% yield (76.11 mg); **<sup>1</sup>H-NMR** (400 MHz, CDCl<sub>3</sub>) δ 7.89-7.83 (m, 4H), 7.49-7.41 (m, 5H), 7.40-7.32 (m, 2H), 7.19-7.16 (m, 3H), 2.45 (d, *J* = 5.8 Hz, 1H), 2.31 (d, *J* = 5.8 Hz, 1H), 1.67 (d, *J* = 5.8 Hz, 1H), 1.59-1.58 (m, 4H); **<sup>13</sup>C-NMR** (100 MHz, CDCl<sub>3</sub>) δ 188.6, 188.3, 172.7, 172.2, 159.0, 158.6, 134.5, 134.4, 131.2, 130.5, 130.1, 129.9, 129.5, 129.3, 129.0, 128.6, 127.5, 127.4, 126.9, 126.6, 126.4, 125.6, 125.5, 125.3, 121.7, 120.8, 36.3, 36.1, 34.4, 34.1, 31.6, 31.5,

14.5, 14.3, 12.5, 12.4; **MS** (ESI)  $m/z$  294  $[M+H]^+$ ; HRMS Calculated for  $C_{18}H_{16}NO_3^+$  294.1125; Found: 294.1129.  $[M+H]^+$ .

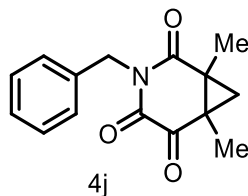

**3-benzyl-1,6-dimethyl-3-azabicyclo[4.1.0]heptane-2,4,5-trione (4j):** Purification by silica gel chromatography (PE:EA=85:15) afforded the desired **4j** as white solid in 71% yield (63.19 mg); **<sup>1</sup>H-NMR** (400 MHz,  $CDCl_3$ )  $\delta$  7.30 (d,  $J = 7.0$  Hz, 2H), 7.24-7.19 (m, 3H), 4.91 (d,  $J = 13.7$  Hz, 1H), 4.81 (d,  $J = 13.7$  Hz, 1H), 1.80 (d,  $J = 5.6$  Hz, 1H), 1.48 (s, 3H), 1.41 (s, 3H), 1.31 (d,  $J = 5.6$  Hz, 1H); **<sup>13</sup>C-NMR** (100 MHz,  $CDCl_3$ )  $\delta$  188.0, 172.3, 158.5, 135.9, 129.1, 128.6, 128.0, 44.6, 35.7, 33.7, 31.2, 14.3, 12.3; **MS** (ESI)  $m/z$  255  $[M+H]^+$ ; HRMS Calculated for  $C_{15}H_{15}NNaO_3^+$  280.0944; Found: 280.0937.  $[M+Na]^+$ .

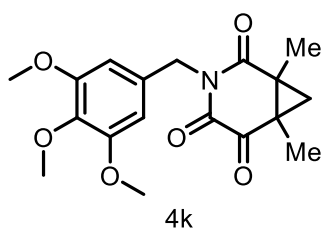

**3-(3,4,5-trimethoxybenzyl)-1,6-dimethyl-3-azabicyclo[4.1.0]heptane-2,4,5-trione (4k):** Purification by silica gel chromatography (PE:EA=85:15) afforded the desired **4k** as white solid in 82% yield (98.55 mg); **<sup>1</sup>H-NMR** (400 MHz,  $CDCl_3$ )  $\delta$  6.64 (s, 2H), 4.88 (d,  $J = 13.6$  Hz, 1H), 4.81 (d,  $J = 13.6$  Hz, 1H), 3.82 (s, 6H), 3.80 (s, 3H), 1.86 (d,  $J = 5.5$  Hz, 1H), 1.56 (s, 3H), 1.48 (s, 3H), 1.40 (d,  $J = 5.8$  Hz, 1H); **<sup>13</sup>C-NMR** (100 MHz,  $CDCl_3$ )  $\delta$  187.9, 172.3, 158.5, 153.1, 137.7, 131.3,

106.6, 60.7, 56.1, 44.8, 35.7, 33.7, 31.2, 14.2, 12.3; **MS** (ESI)  $m/z$  348  $[M+H]^+$ ; HRMS Calculated for  $C_{18}H_{22}NO_6^+$  348.1442; Found: 348.1445.  $[M+H]^+$ .

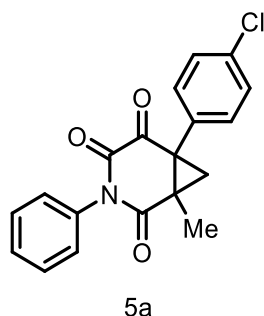

**6-(4-chlorophenyl)-1-methyl-3-phenyl-3-azabicyclo[4.1.0]heptane-2,4,5-trione (5a):**

Purification by silica gel chromatography (PE:EA=85:15) afforded the desired **5a** as white solid in 72% yield (84.64 mg);  $^1\text{H-NMR}$  (400 MHz,  $\text{CDCl}_3$ )  $\delta$  7.38-7.35 (m, 5H), 7.13-7.07 (m, 4H), 2.48 (d,  $J = 6.0$  Hz, 1H), 2.11 (d,  $J = 7.8$  Hz, 1H), 1.21 (s, 3H);  $^{13}\text{C-NMR}$  (100 MHz,  $\text{CDCl}_3$ )  $\delta$  186.4, 171.8, 158.5, 135.2, 133.8, 132.0, 129.5, 129.3, 129.2, 127.8, 45.1, 35.2, 29.0, 16.2; **MS** (ESI)  $m/z$  340  $[M+H]^+$ ; HRMS Calculated for  $C_{19}H_{15}ClNO_3^+$  340.0735; Found: 340.0758.  $[M+H]^+$ .

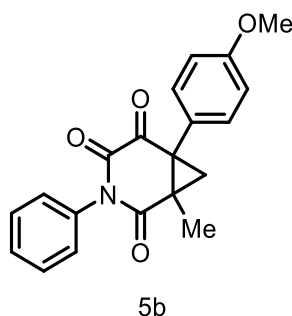

**6-(4-methoxyphenyl)-1-methyl-3-phenyl-3-azabicyclo[4.1.0]heptane-2,4,5-trione (5b):**

Purification by silica gel chromatography (PE:EA=85:15) afforded the desired **5b** as white solid in 75% yield (87.01 mg);  $^1\text{H-NMR}$  (400 MHz,  $\text{CDCl}_3$ )  $\delta$  7.52-7.45 (m, 3H), 7.18-7.17 (m, 2H), 7.16-7.12 (m, 2H), 6.99-6.96 (m, 2H), 3.85 (s, 3H), 2.52 (d,  $J = 5.9$  Hz, 1H), 2.19 (d,  $J = 6.0$  Hz, 1H), 1.28 (s, 3H);  $^{13}\text{C-NMR}$  (100 MHz,  $\text{CDCl}_3$ )  $\delta$  187.1, 172.3, 160.0, 158., 134.0,

131.8, 129.5, 129.3, 127.8, 122.5, 114.5, 55.4, 45.3, 35.6, 29.4, 16.2; **MS** (ESI)  $m/z$  255  $[M+H]^+$ ; HRMS Calculated for  $C_{20}H_{18}NO_4^+$  336.1230; Found: 336.1223.  $[M+H]^+$ .

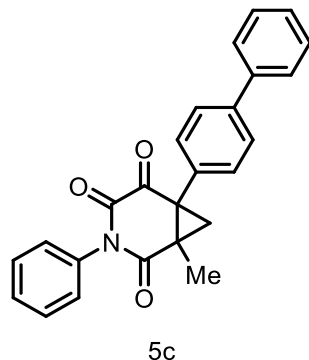

**6-([1,1'-biphenyl]-4-yl)-1-methyl-3-phenyl-3-azabicyclo[4.1.0]heptane-2,4,5-trione (5c):**

Purification by silica gel chromatography (PE:EA=85:15) afforded the desired **5c** as white solid in 71% yield (93.69 mg); **<sup>1</sup>H-NMR** (400 MHz,  $CDCl_3$ )  $\delta$  7.67 (d,  $J = 8.5$  Hz, 2H), 7.64-7.61 (m, 2H), 7.53-7.45 (m, 5H), 7.41-7.37 (m, 1H), 7.33 (d,  $J = 8.3$  Hz, 2H), 7.20-7.17 (m, 2H), 2.59 (d,  $J = 6.3$  Hz, 1H), 2.27 (d,  $J = 6.3$  Hz, 1H), 1.33 (s, 3H); **<sup>13</sup>C-NMR** (100 MHz,  $CDCl_3$ )  $\delta$  186.8, 172.2, 158.8, 142.0, 140.2, 134.0, 131.1, 129.7, 129.5, 129.3, 128.9, 127.9, 127.7, 127.2, 45.6, 35.4, 29.2, 16.3; **MS** (ESI)  $m/z$  255  $[M+H]^+$ ; HRMS Calculated for  $C_{25}H_{20}NO_3^+$  382.1438; Found: 382.1430.  $[M+H]^+$ .

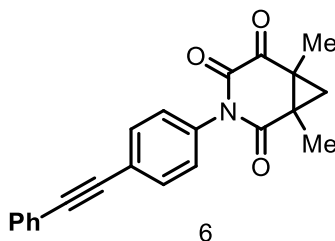

**1,6-dimethyl-3-(4-(phenylethynyl)phenyl)-3-azabicyclo[4.1.0]heptane-2,4,5-trione (6):**

Purification by silica gel chromatography (PE:EA=85:15) afforded the desired **6** as dark brown solid in 65% yield (71.75 mg); **<sup>1</sup>H-NMR** (400 MHz,  $CDCl_3$ )  $\delta$  7.61-7.58 (m, 2H), 7.54-7.51

(m, 2H), 7.36-7.33 (m, 3H), 7.08-7.05 (m, 2H), 2.23 (d,  $J = 5.8$  Hz, 1H), 1.60 (s, 3H), 1.56 (d,  $J = 4.8$  Hz, 4H);  $^{13}\text{C-NMR}$  (100 MHz,  $\text{CDCl}_3$ )  $\delta$  188.1, 172.3, 158.2, 133.5, 132.5, 131.7, 128.5, 128.4, 127.9, 124.4, 122.8, 90.7, 88.3, , 36.1, 34.1, 31.2, 14.3, 12.4; **MS** (ESI)  $m/z$  255  $[\text{M}+\text{H}]^+$ ; HRMS Calculated for  $\text{C}_{22}\text{H}_{18}\text{NO}_3^+$  344.1281; Found: 344.1274.  $[\text{M}+\text{H}]^+$ .

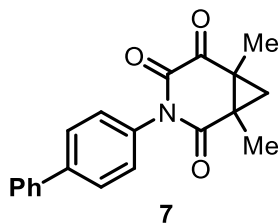

**3-([1,1'-biphenyl]-4-yl)-1,6-dimethyl-3-azabicyclo[4.1.0]heptane-2,4,5-trione (7):**

Purification by silica gel chromatography (PE:EA=85:15) afforded the desired **7** as white solid in 60% yield (114.26 mg);  $^1\text{H-NMR}$  (400 MHz,  $\text{CDCl}_3$ )  $\delta$  7.67-7.64 (m, 2H), 7.59-7.57 (m, 2H), 7.46-7.42 (m, 2H), 7.39-7.35 (m, 1H), 7.18-7.15 (m, 2H), 2.26 (d,  $J = 5.8$  Hz, 1H), 1.63 (s, 3H), 1.59 (d,  $J = 7.4$  Hz, 4H);  $^{13}\text{C-NMR}$  (100 MHz,  $\text{CDCl}_3$ )  $\delta$  13C-NMR (101 MHz,  $\text{CHLOROFORM-D}$ )  $\delta$  188.6, 172.8, 158.7, 134.0, 133.0, 132.2, 129.0, 128.8, 128.4, 124.9, 123.3, 36.6, 34.6, 31.7, 14.8, 12.9; **MS** (ESI)  $m/z$  255  $[\text{M}+\text{H}]^+$ ; HRMS Calculated for  $\text{C}_{20}\text{H}_{18}\text{NO}_3^+$  320.1281; Found: 320.1270.  $[\text{M}+\text{H}]^+$ .

(9) Copies of  $^1\text{H}$  NMR,  $^{13}\text{C}$  NMR,  $^{19}\text{F}$  NMR and Mass Spectra

$^1\text{H}$  NMR spectrum of 1g (400 MHz,  $\text{CDCl}_3$ )

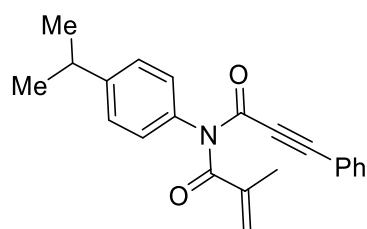

*N*-(4-isopropylphenyl)-*N*-(3-phenylpropioyl)methacrylamide

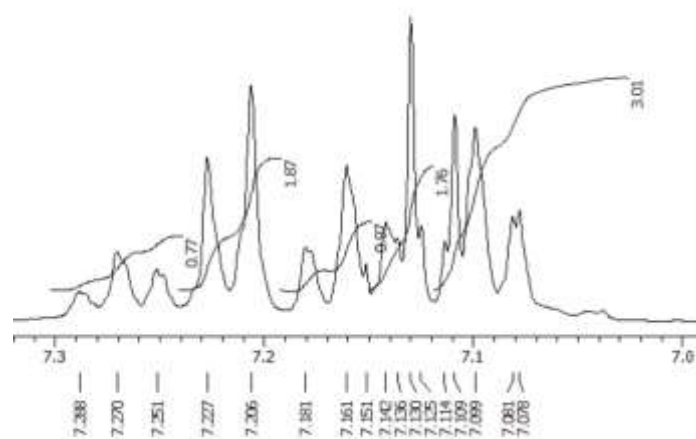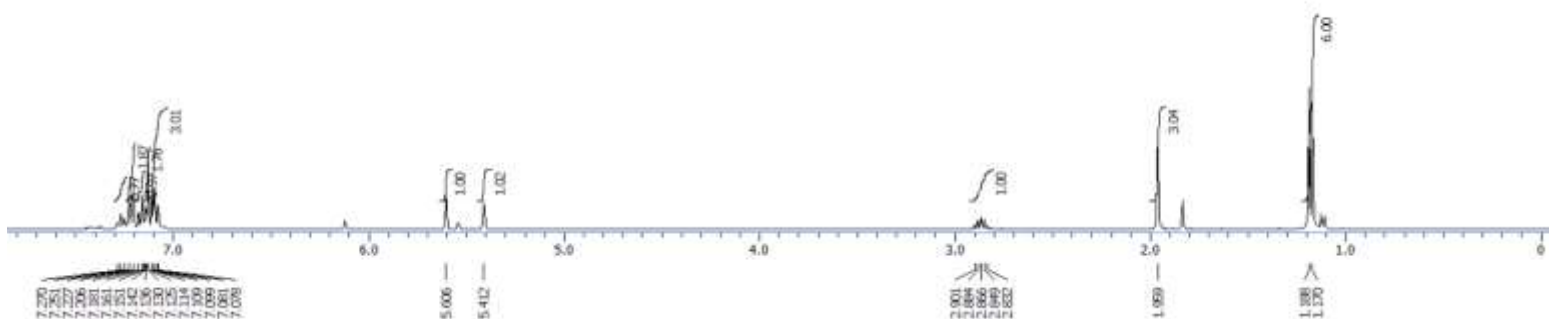

<sup>13</sup>C NMR spectrum of 1g (100 MHz, CDCl<sub>3</sub>)

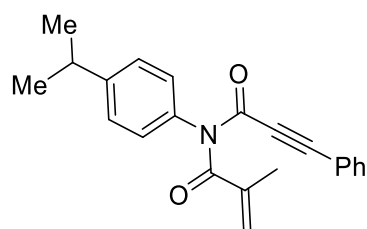

*N*-(4-isopropylphenyl)-*N*-(3-phenylpropioyl)methacrylamide

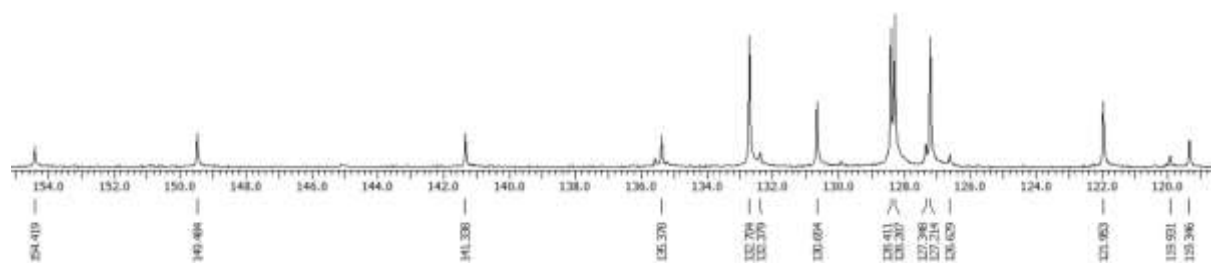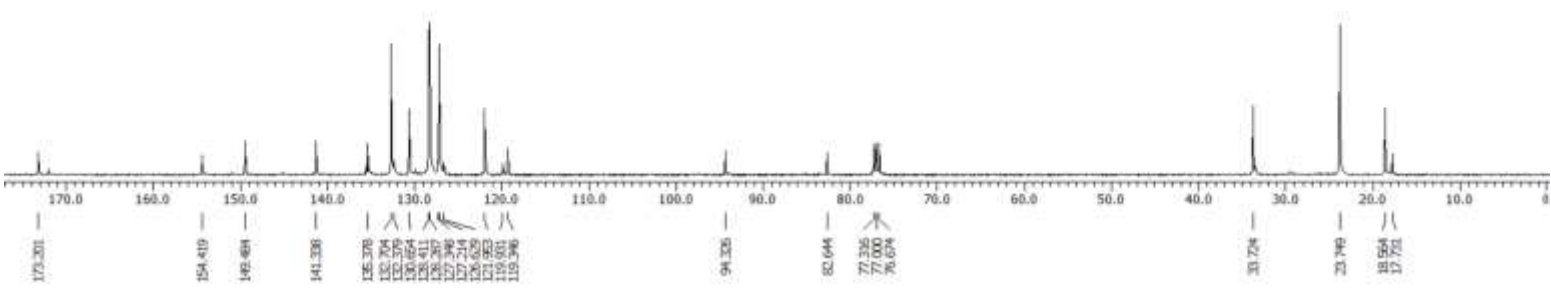



# HRMS spectrum of 1g

## Qualitative Compound Report

|                               |              |                      |                     |
|-------------------------------|--------------|----------------------|---------------------|
| <b>Data File</b>              | 348-A.d      | <b>Sample Name</b>   | 348-A               |
| <b>Sample Type</b>            | Sample       | <b>Position</b>      | F1-B3               |
| <b>Instrument Name</b>        | Instrument 1 | <b>User Name</b>     |                     |
| <b>Acq Method</b>             | MS Scan.m    | <b>Acquired Time</b> | 03-05-2024 13:28:32 |
| <b>IRM Calibration Status</b> | Success      | <b>DA Method</b>     | Default.m           |
| <b>Comment</b>                |              |                      |                     |

|                       |                             |              |   |
|-----------------------|-----------------------------|--------------|---|
| <b>Sample Group</b>   |                             | <b>Info.</b> | 3 |
| <b>Acquisition SW</b> | 6200 series TOF/6500 series |              |   |
| <b>Version</b>        | Q-TOF 8.05.01 (03125)       |              |   |

### Compound Table

| Compound Label      | RT    | Mass     | Abund   | Formula      | Tgt Mass | Diff (ppm) | MFG Formula  | DB Formula   |
|---------------------|-------|----------|---------|--------------|----------|------------|--------------|--------------|
| Cpd 1: C22 H21 N O2 | 0.353 | 331.1579 | 1180221 | C22 H21 N O2 | 331.1572 | 1.9        | C22 H21 N O2 | C22 H21 N O2 |

| Compound Label      | m/z      | RT    | Algorithm       | Mass     |
|---------------------|----------|-------|-----------------|----------|
| Cpd 1: C22 H21 N O2 | 332.1652 | 0.353 | Find By Formula | 331.1579 |

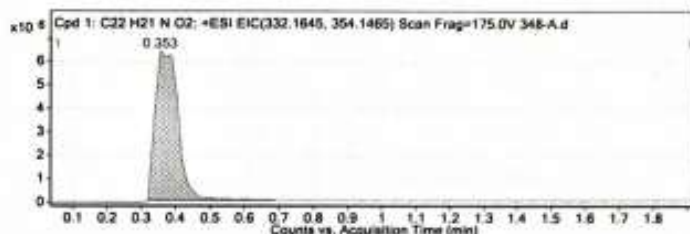

### MS Spectrum

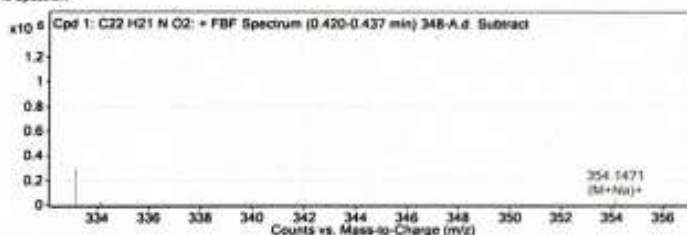

### MS Zoomed Spectrum

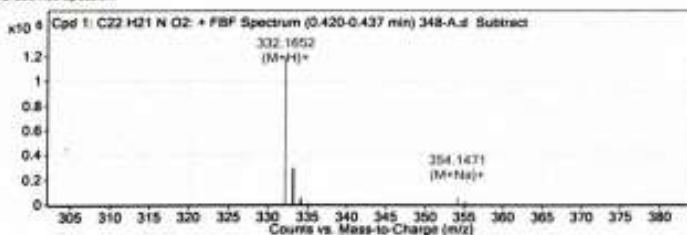

### MS Spectrum Peak List

| m/z      | z | Abund      | Formula     | Ion     |
|----------|---|------------|-------------|---------|
| 332.1652 | 1 | 1180221.13 | C22H22NO2   | (M+H)+  |
| 333.1684 | 1 | 297861.06  | C22H22NO2   | (M+H)+  |
| 334.1707 | 1 | 38231.71   | C22H22NO2   | (M+H)+  |
| 335.1737 | 1 | 4033.71    | C22H22NO2   | (M+H)+  |
| 336.174  | 1 | 726.23     | C22H22NO2   | (M+H)+  |
| 354.1471 | 1 | 51403.02   | C22H21NNaO2 | (M+Na)+ |
| 355.1512 | 1 | 13572.05   | C22H21NNaO2 | (M+Na)+ |
| 356.1531 | 1 | 3627.28    | C22H21NNaO2 | (M+Na)+ |
| 357.1675 | 1 | 768.45     | C22H21NNaO2 | (M+Na)+ |

--- End Of Report ---

<sup>1</sup>H NMR spectrum of **1i** (400 MHz, CDCl<sub>3</sub>)

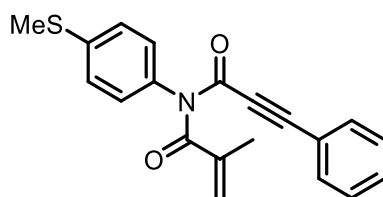

*N*-(4-(methylthio)phenyl)-*N*-(3-phenylpropioyl)methacrylamide

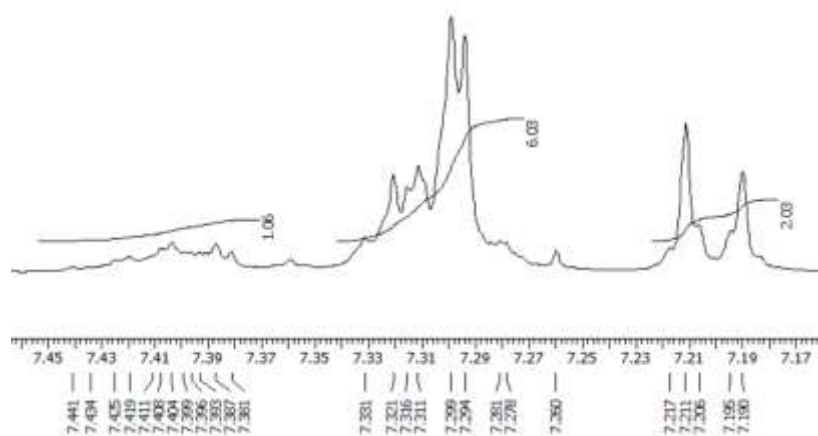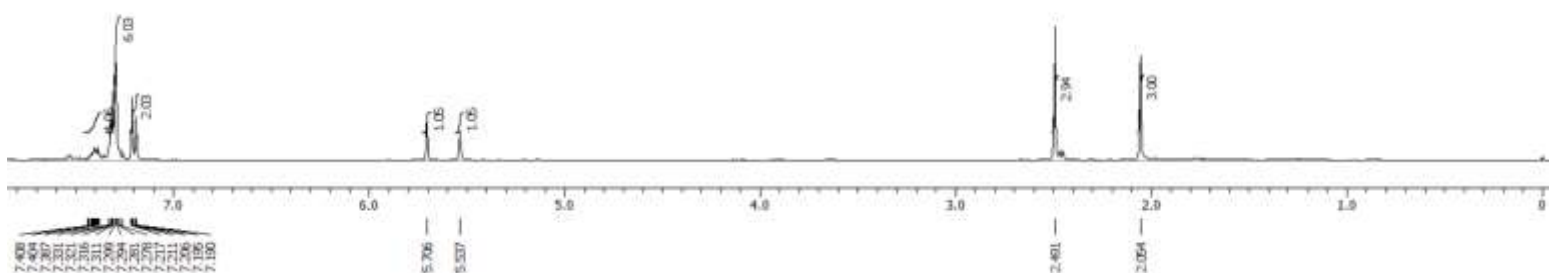

<sup>13</sup>C NMR spectrum of 1i (100 MHz, CDCl<sub>3</sub>)



*N*-(4-(methylthio)phenyl)-*N*-(3-phenylpropiolyl)methacrylamide

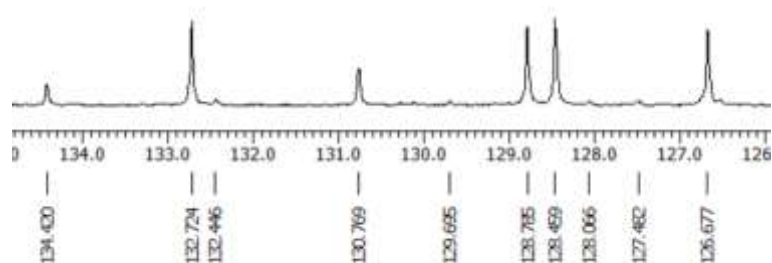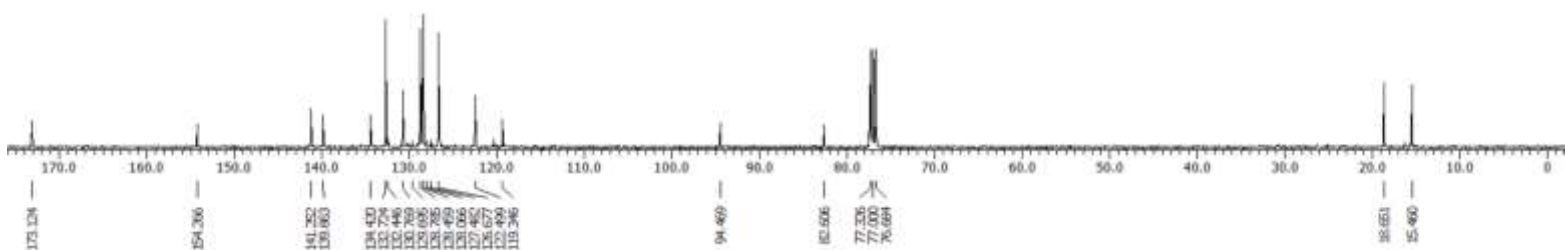

# HRMS spectrum of 1i

|                    |                 |                               |         |                        |                                 |
|--------------------|-----------------|-------------------------------|---------|------------------------|---------------------------------|
| <b>Sample Name</b> | SMT 346(A)      | <b>Position</b>               | P1-B5   | <b>Instrument Name</b> | BIOQTOF                         |
| <b>User Name</b>   | SYSTEM (SYSTEM) | <b>Inj Vol</b>                | 1       | <b>InjPosition</b>     |                                 |
| <b>Sample Type</b> | Sample          | <b>IRM Calibration Status</b> | Success | <b>Data Filename</b>   | SMT 346(A).d                    |
| <b>ACQ Method</b>  | Pos_100ACN.m    | <b>Comment</b>                |         | <b>Acquired Time</b>   | 27-04-2024 12:38:47 (UTC+05:30) |

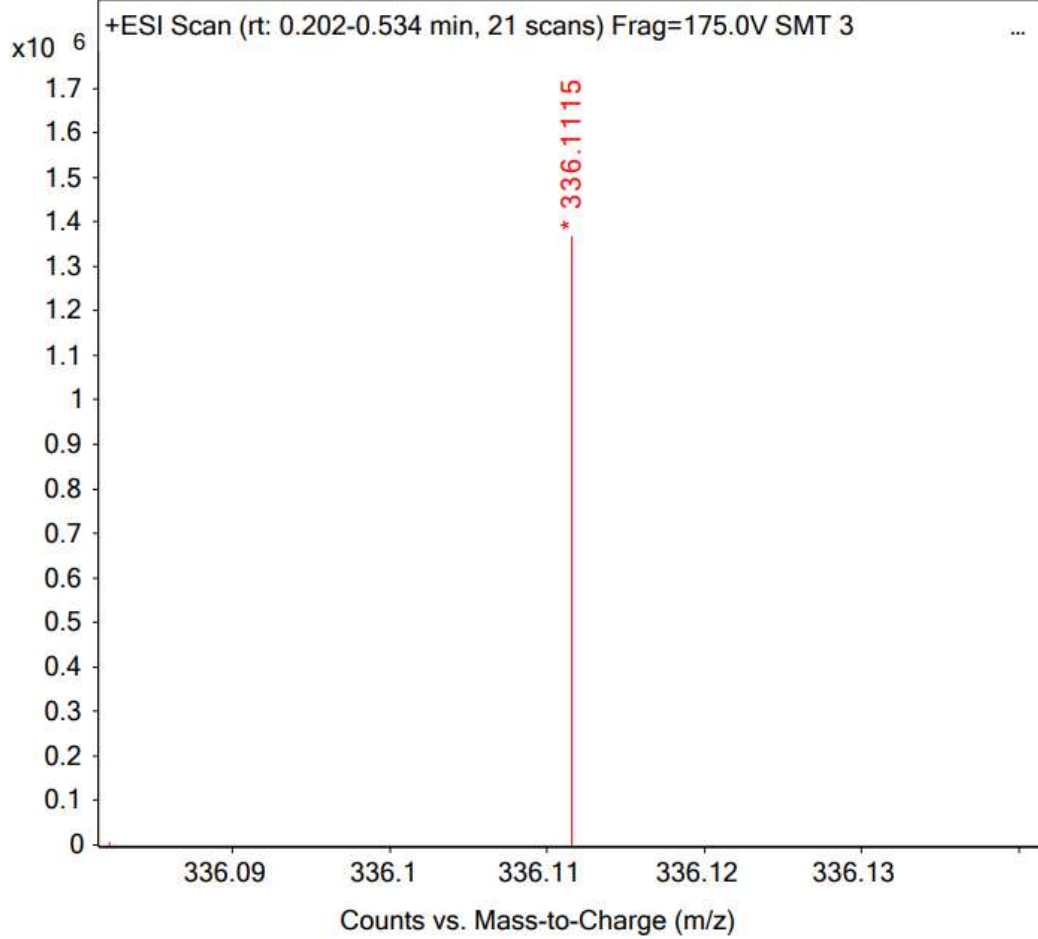

<sup>1</sup>H NMR spectrum of 11 (400 MHz, CDCl<sub>3</sub>)

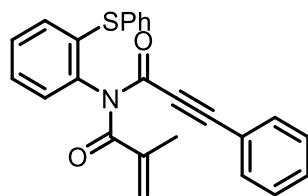

*N*-(3-phenylpropiolyl)-*N*-(2-(phenylthio)phenyl)methacrylamide

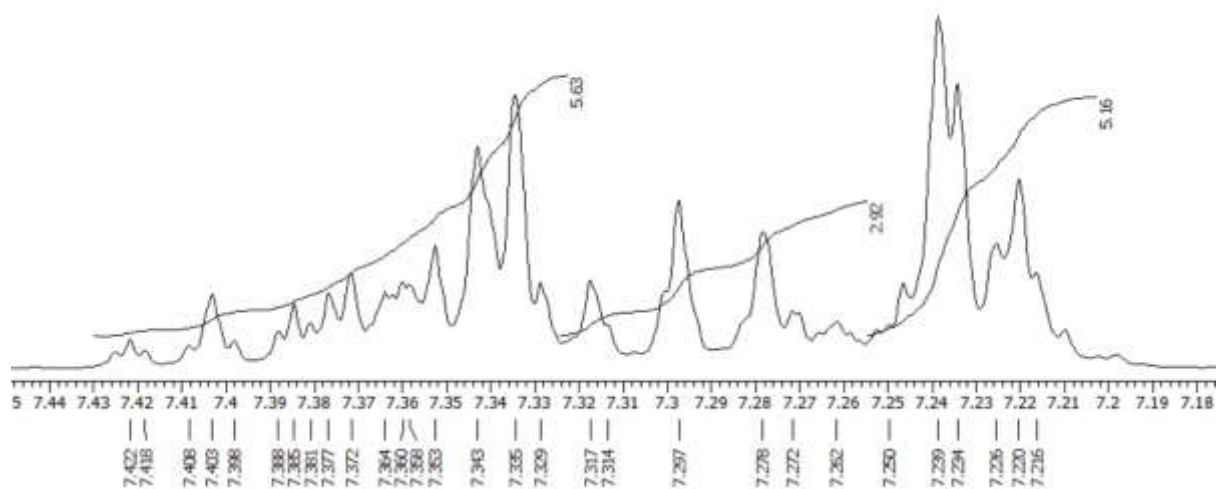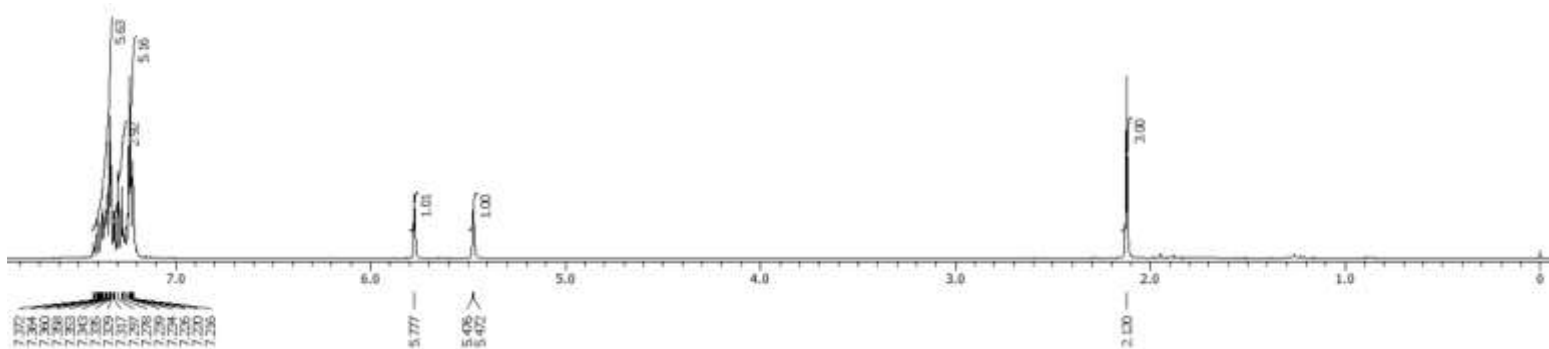

<sup>13</sup>C NMR spectrum of 11 (100 MHz, CDCl<sub>3</sub>)



*N*-(3-phenylpropioyl)-*N*-(2-(phenylthio)phenyl)methacrylamide

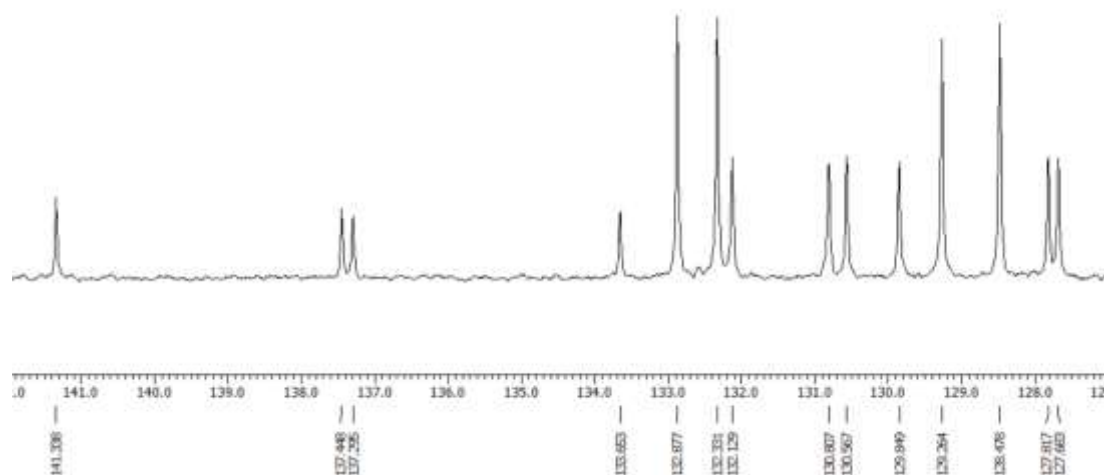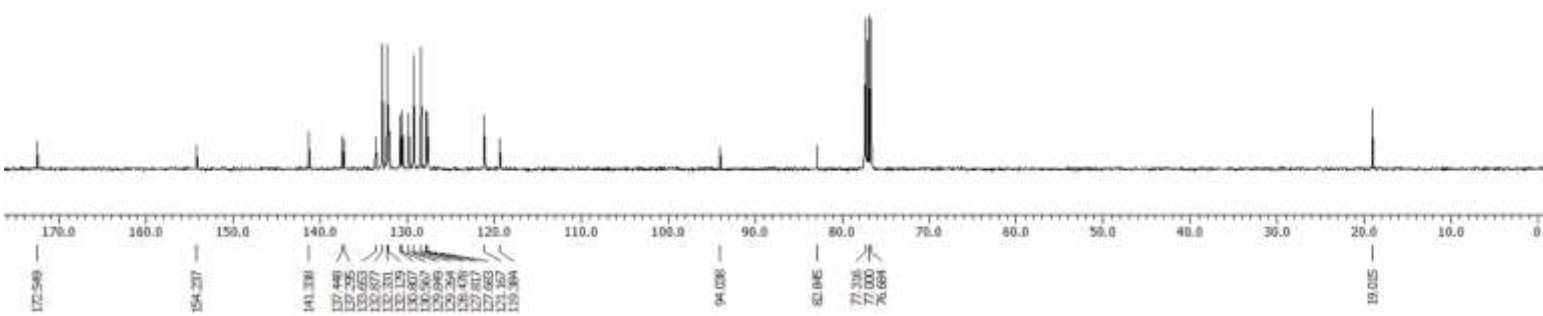

# HRMS spectrum of 11

## Qualitative Compound Report

|                        |              |               |                     |
|------------------------|--------------|---------------|---------------------|
| Data File              | ST-349-A.d   | Sample Name   | ST-349-A            |
| Sample Type            | Sample       | Position      | P1-A9               |
| Instrument Name        | Instrument 1 | User Name     |                     |
| Acq Method             | MS Scan.m    | Acquired Time | 11-05-2024 12:26:28 |
| IRM Calibration Status | Success      | DA Method     | Default.m           |
| Comment                |              |               |                     |

|                |                             |   |
|----------------|-----------------------------|---|
| Sample Group   | Info.                       | 3 |
| Acquisition SW | 6200 series TOF/6500 series |   |
| Version        | Q-TOF 8.05.01 (85125)       |   |

### Compound Table

| Compound Label        | RT    | Mass     | Abund | Formula        | Tgt Mass | Diff (ppm) | MFG Formula    | DB Formula     |
|-----------------------|-------|----------|-------|----------------|----------|------------|----------------|----------------|
| Cpd 1: C25 H19 N O2 S | 0.679 | 397.1164 | 80023 | C25 H19 N O2 S | 397.1136 | 6.98       | C25 H19 N O2 S | C25 H19 N O2 S |

| Compound Label        | m/z      | RT    | Algorithm       | Mass     |
|-----------------------|----------|-------|-----------------|----------|
| Cpd 1: C25 H19 N O2 S | 420.1046 | 0.679 | Find By Formula | 397.1164 |

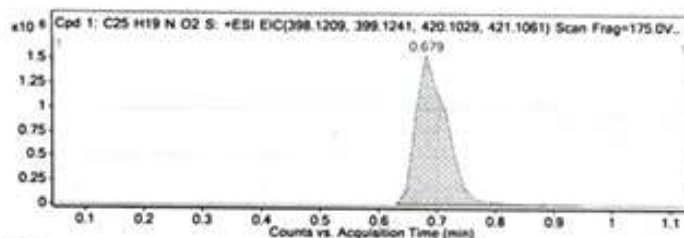

### MS Spectrum

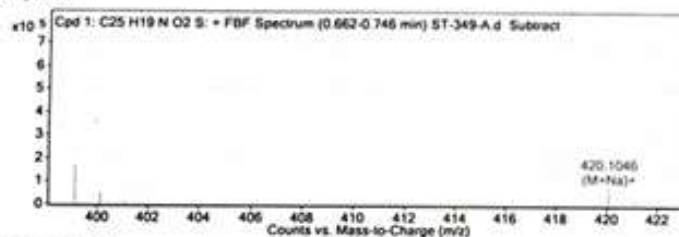

### MS Zoomed Spectrum

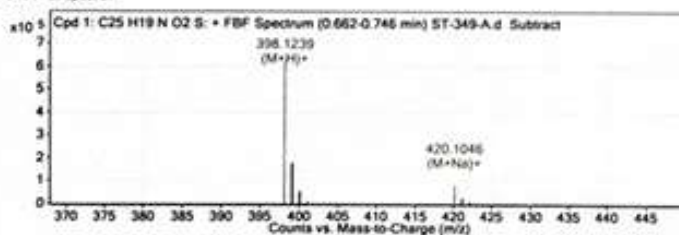

### MS Spectrum Peak List

| m/z      | z | Abund     | Formula      | Ion     |
|----------|---|-----------|--------------|---------|
| 398.1239 | 1 | 630825.88 | C25H20NO2S   | (M+H)+  |
| 399.1266 | 1 | 172347.55 | C25H20NO2S   | (M+H)+  |
| 400.1244 | 1 | 49340.97  | C25H20NO2S   | (M+H)+  |
| 401.1253 | 1 | 10554.12  | C25H20NO2S   | (M+H)+  |
| 402.1353 | 1 | 1845.54   | C25H20NO2S   | (M+H)+  |
| 420.1046 | 1 | 80023.44  | C25H19NNaO2S | (M+Na)+ |
| 421.1081 | 1 | 22635.56  | C25H19NNaO2S | (M+Na)+ |
| 422.1065 | 1 | 6917.5    | C25H19NNaO2S | (M+Na)+ |
| 423.1108 | 1 | 1321.62   | C25H19NNaO2S | (M+Na)+ |

--- End Of Report ---

**<sup>1</sup>H NMR spectrum of 1m (400 MHz, CDCl<sub>3</sub>)**

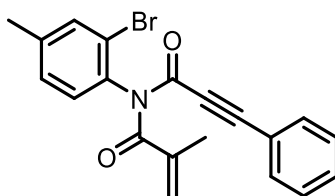

*N*-(2-bromo-4-methylphenyl)-*N*-(3-phenylpropioyl)methacrylamide

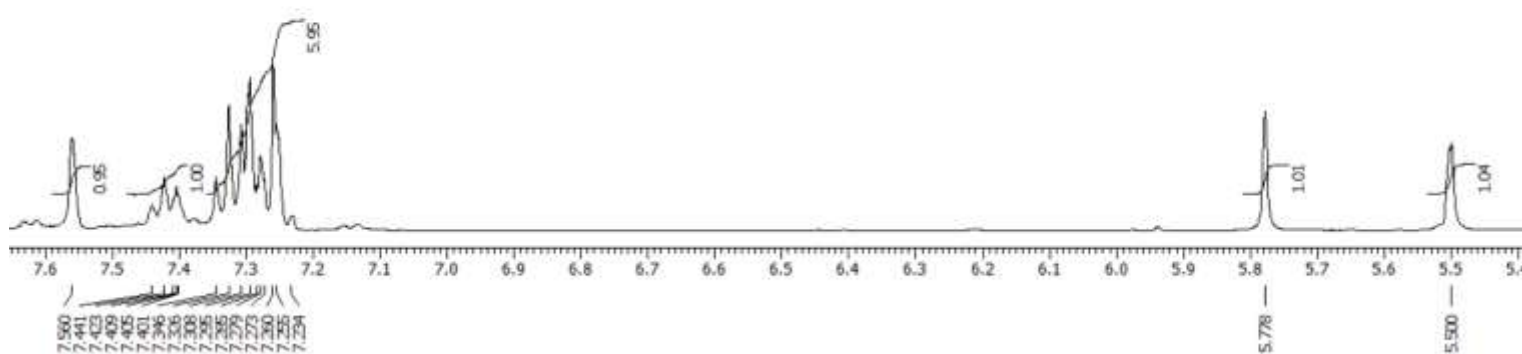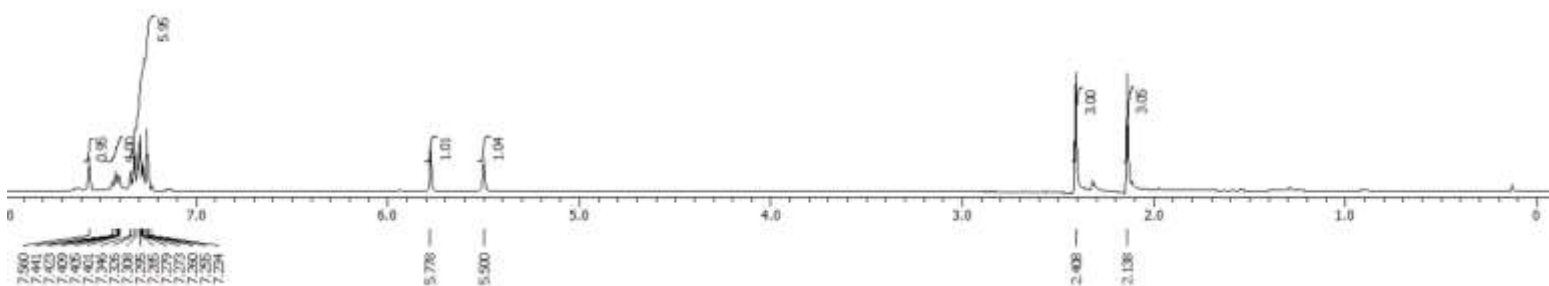



<sup>13</sup>C NMR spectrum of 1m (100 MHz, CDCl<sub>3</sub>)



*N*-(2-bromo-4-methylphenyl)-*N*-(3-phenylpropiolyl)methacrylamide

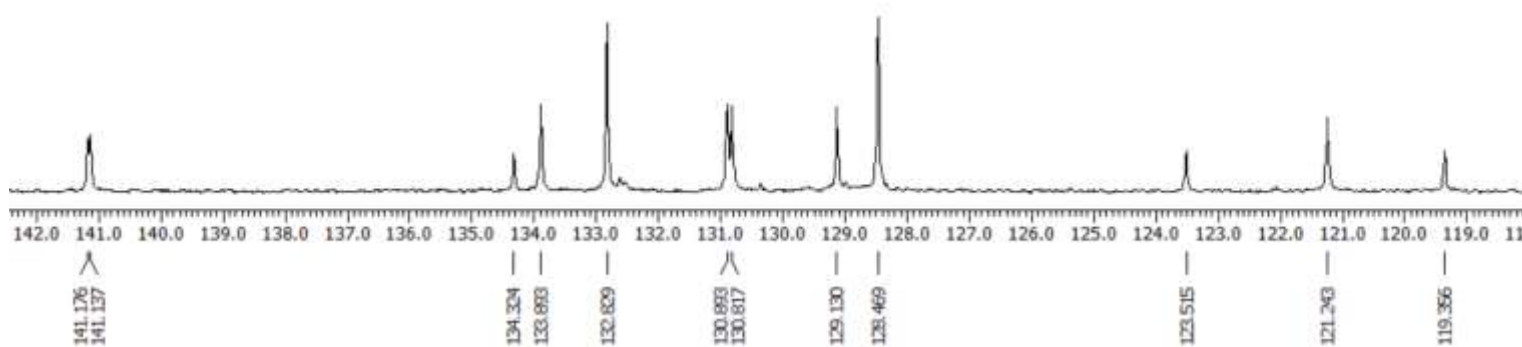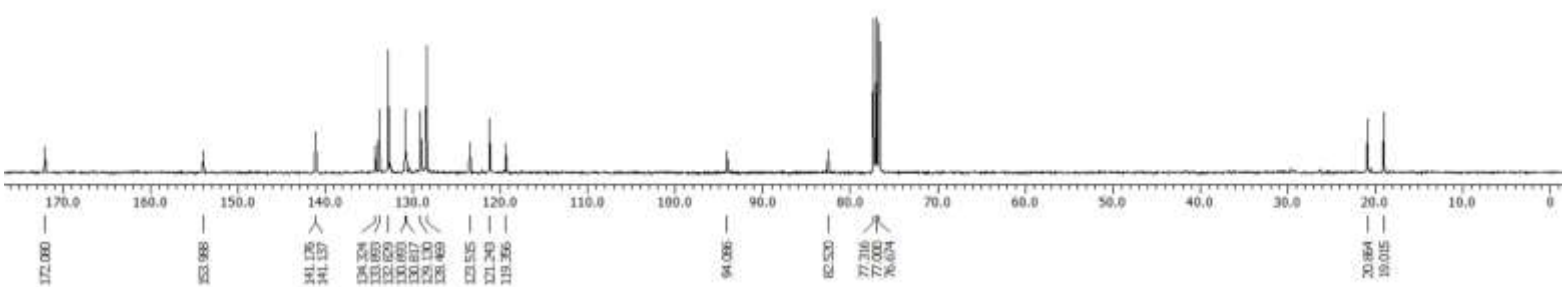

# HRMS spectrum of 1m

## Qualitative Compound Report

**Data File** 281-A.d **Sample Name** 281-A  
**Sample Type** Sample **Position** P1-B0  
**Instrument Name** Instrument 1 **User Name**  
**Acq Method** MS Scan.m **Acquired Time** 03-05-2024 16:18:10  
**IRM Calibration Status** Success **DA Method** Default.m  
**Comment**

**Sample Group** Info. 3  
**Acquisition SW** 6200 series TOF/6500 series  
**Version** Q-TOF 8.05.01 (85125)

### Compound Table

| Compound Label         | RT    | Mass     | Abund | Formula         | Tgt Mass | SDM (ppm) | MFG Formula     | DB Formula      |
|------------------------|-------|----------|-------|-----------------|----------|-----------|-----------------|-----------------|
| Cpd 1: C20 H16 Br N O2 | 0.429 | 381.0388 | 37453 | C20 H16 Br N O2 | 381.0384 | 6.33      | C20 H16 Br N O2 | C20 H16 Br N O2 |

| Compound Label         | m/z      | RT    | Algorithm       | Mass     |
|------------------------|----------|-------|-----------------|----------|
| Cpd 1: C20 H16 Br N O2 | 406.0248 | 0.429 | Find By Formula | 381.0388 |

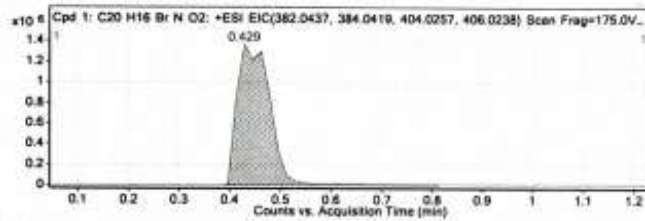

### MS Spectrum

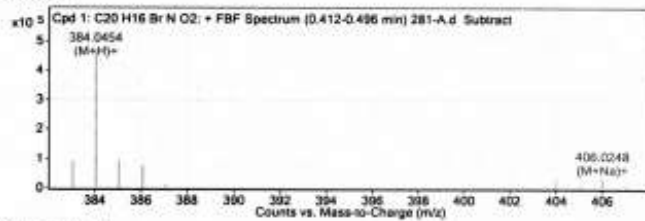

### MS Zoomed Spectrum

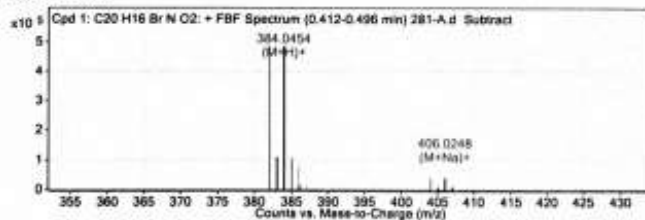

### MS Spectrum Peak List

| m/z      | z | Abund     | Formula       | Ion                 |
|----------|---|-----------|---------------|---------------------|
| 382.044  | 1 | 451917.72 | C20H17BrNO2   | (M+H) <sup>+</sup>  |
| 383.0472 | 1 | 83936.3   | C20H17BrNO2   | (M+H) <sup>+</sup>  |
| 384.0454 | 1 | 461409.97 | C20H17BrNO2   | (M+H) <sup>+</sup>  |
| 385.0482 | 1 | 96072.84  | C20H17BrNO2   | (M+H) <sup>+</sup>  |
| 386.0571 | 1 | 77821.27  | C20H17BrNO2   | (M+H) <sup>+</sup>  |
| 387.061  | 1 | 15068.45  | C20H17BrNO2   | (M+H) <sup>+</sup>  |
| 388.0597 | 1 | 3513.4    | C20H17BrNO2   | (M+H) <sup>+</sup>  |
| 404.0268 | 1 | 37138.53  | C20H16BrNNaO2 | (M+Na) <sup>+</sup> |
| 405.0303 | 1 | 8518.6    | C20H16BrNNaO2 | (M+Na) <sup>+</sup> |
| 406.0248 | 1 | 37453.49  | C20H16BrNNaO2 | (M+Na) <sup>+</sup> |
| 407.0289 | 1 | 8358.58   | C20H16BrNNaO2 | (M+Na) <sup>+</sup> |

<sup>1</sup>H NMR spectrum of 1n (400 MHz, CDCl<sub>3</sub>)

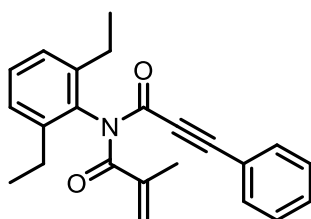

*N*-(2,6-diethylphenyl)-*N*-(3-phenylpropiolyl)methacrylamide

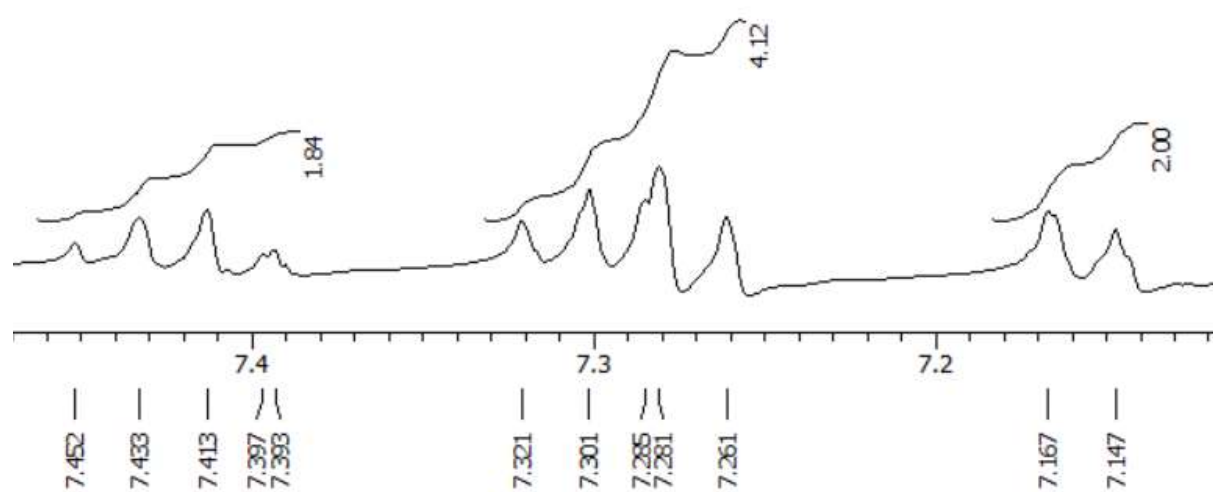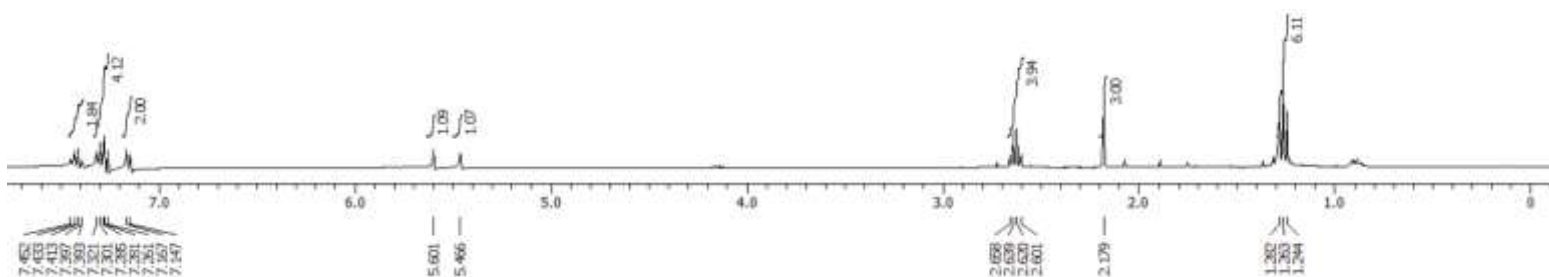

<sup>13</sup>C NMR spectrum of 1n (100 MHz, CDCl<sub>3</sub>)

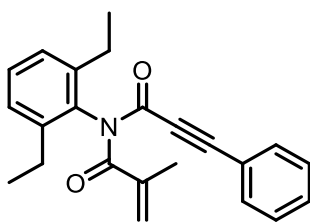

*N*-(2,6-diethylphenyl)-*N*-(3-phenylpropiolyl)methacrylamide

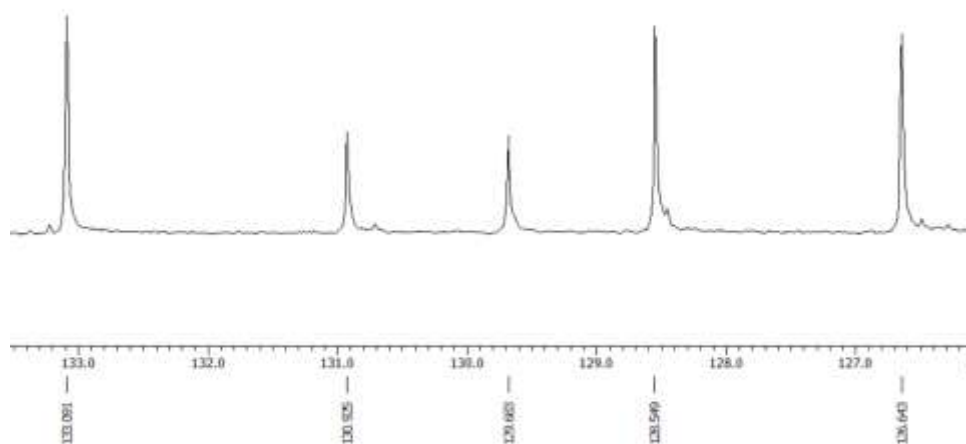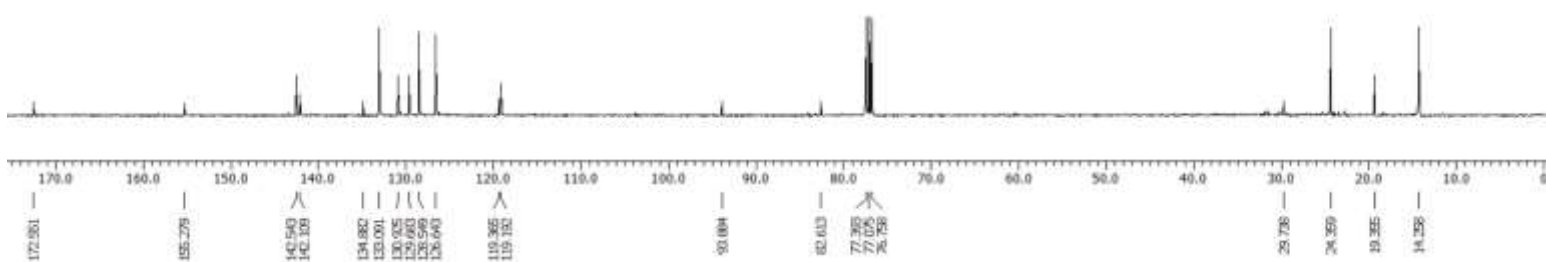

# HRMS spectrum of 1n

|                    |                 |                               |         |                        |                                 |
|--------------------|-----------------|-------------------------------|---------|------------------------|---------------------------------|
| <b>Sample Name</b> | SMT 316(A)      | <b>Position</b>               | P1-C9   | <b>Instrument Name</b> | BIOQTOF                         |
| <b>User Name</b>   | SYSTEM (SYSTEM) | <b>Inj Vol</b>                | 1       | <b>InjPosition</b>     |                                 |
| <b>Sample Type</b> | Sample          | <b>IRM Calibration Status</b> | Success | <b>Data Filename</b>   | SMT316(A).d                     |
| <b>ACQ Method</b>  | Pos_100ACN.m    | <b>Comment</b>                |         | <b>Acquired Time</b>   | 27-04-2024 13:36:51 (UTC+05:30) |

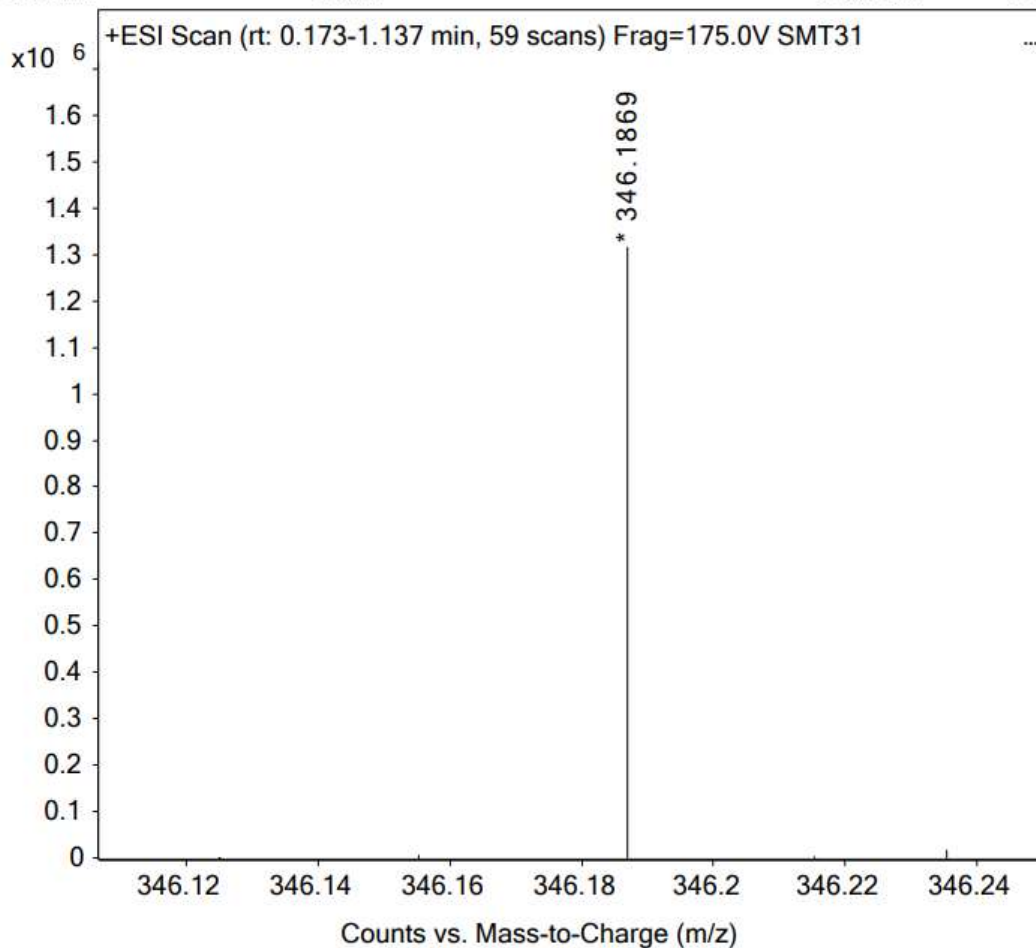

<sup>1</sup>H NMR spectrum of 1o (400 MHz, CDCl<sub>3</sub>)

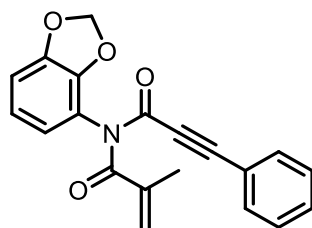

*N*-(benzo[*d*][1,3]dioxol-4-yl)-*N*-(3-phenylpropioloyl)methacrylamide

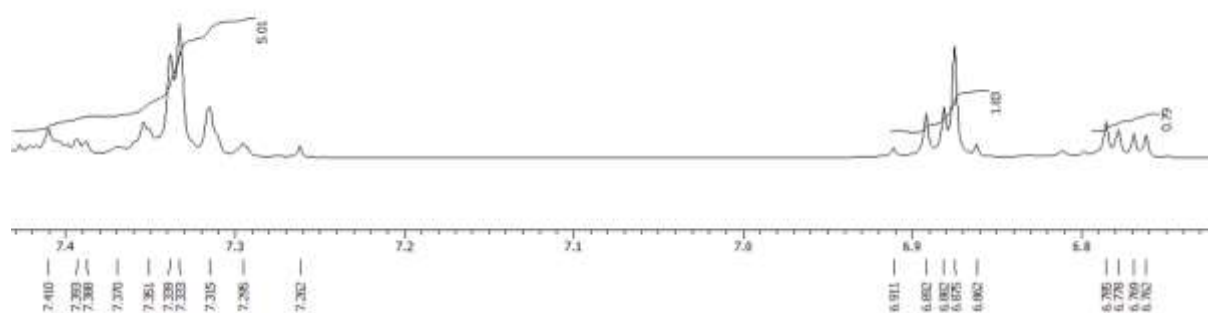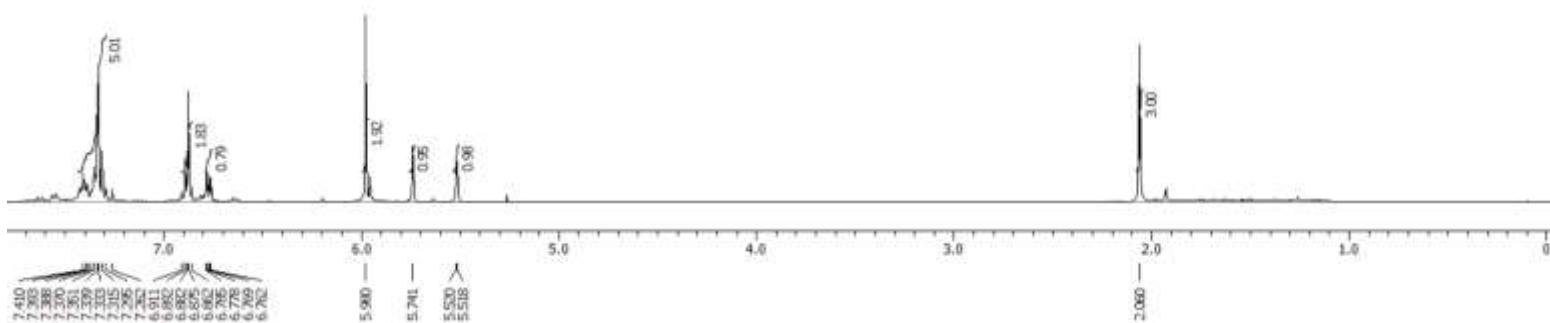

<sup>13</sup>C NMR spectrum of 1o (100 MHz, CDCl<sub>3</sub>)



*N*-(benzo[*d*][1,3]dioxol-4-yl)-*N*-(3-phenylpropioloyl)methacrylamide

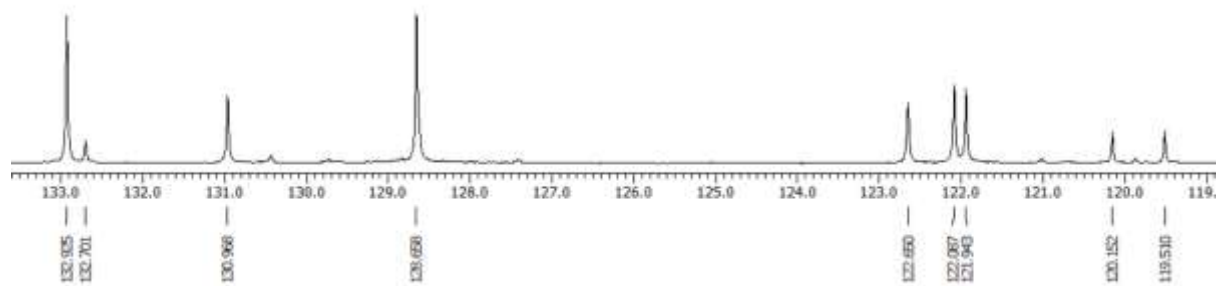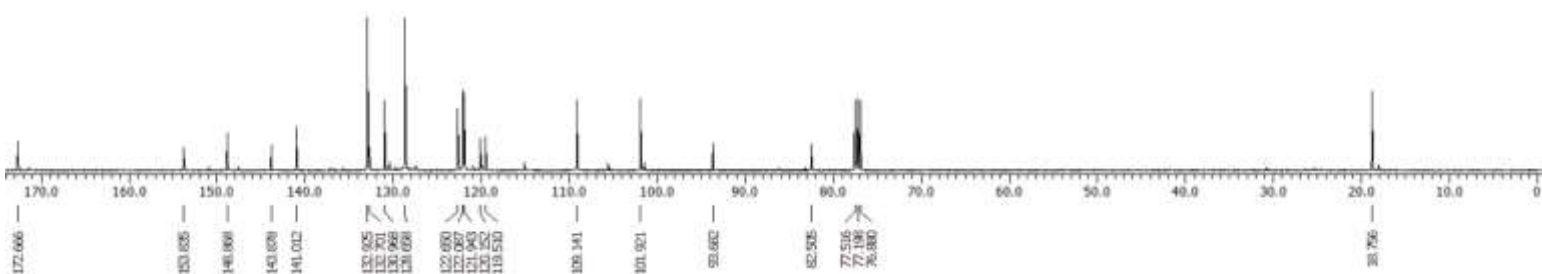

# HRMS spectrum of 1o

|                    |                 |                               |         |                        |                                 |
|--------------------|-----------------|-------------------------------|---------|------------------------|---------------------------------|
| <b>Sample Name</b> | SMT 345(A)      | <b>Position</b>               | P1-C8   | <b>Instrument Name</b> | BIOQTOF                         |
| <b>User Name</b>   | SYSTEM (SYSTEM) | <b>Inj Vol</b>                | 1       | <b>InjPosition</b>     |                                 |
| <b>Sample Type</b> | Sample          | <b>IRM Calibration Status</b> | Success | <b>Data Filename</b>   | SMT345(A).d                     |
| <b>ACQ Method</b>  | Pos_100ACN.m    | <b>Comment</b>                |         | <b>Acquired Time</b>   | 27-04-2024 13:32:58 (UTC+05:30) |

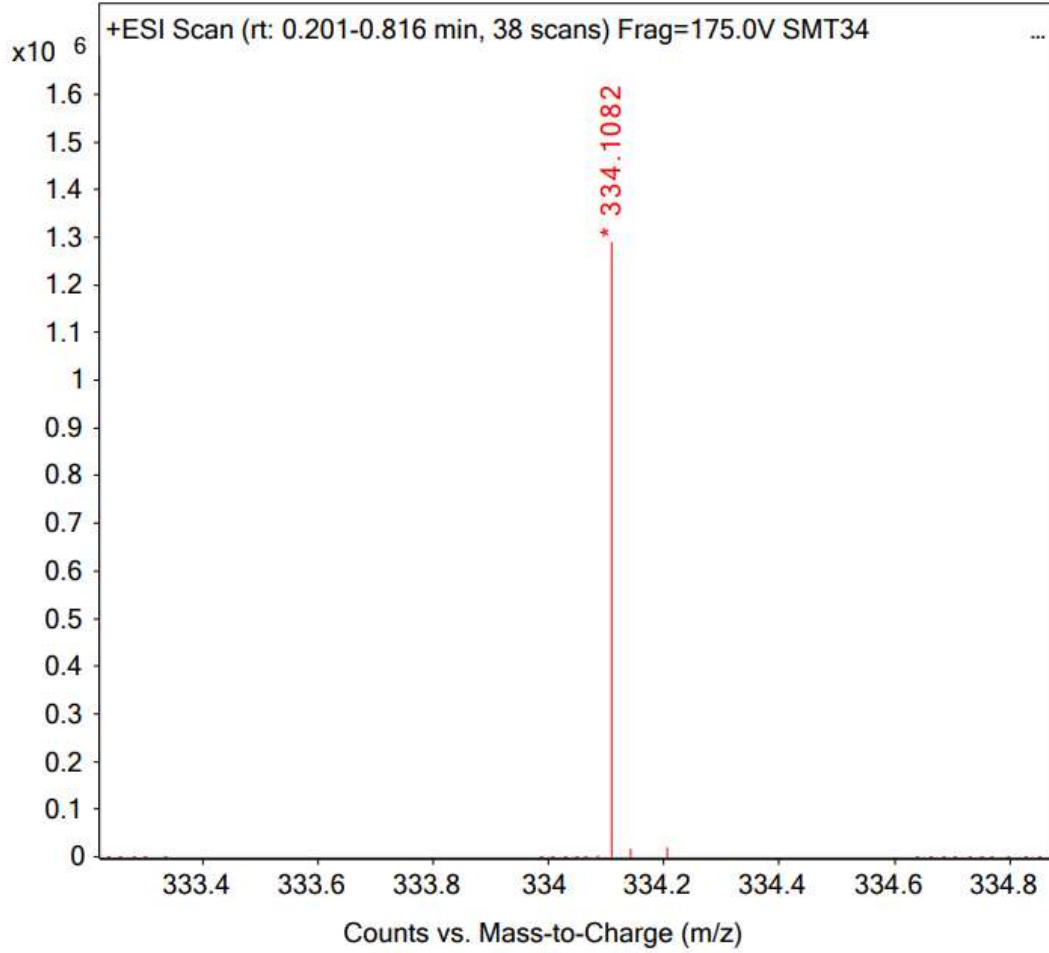



<sup>1</sup>H NMR spectrum of 1p (400 MHz, CDCl<sub>3</sub>)

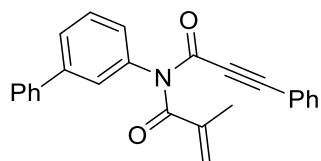

*N*-([1,1'-biphenyl]-3-yl)-*N*-(3-phenylpropioyl)methacrylamide

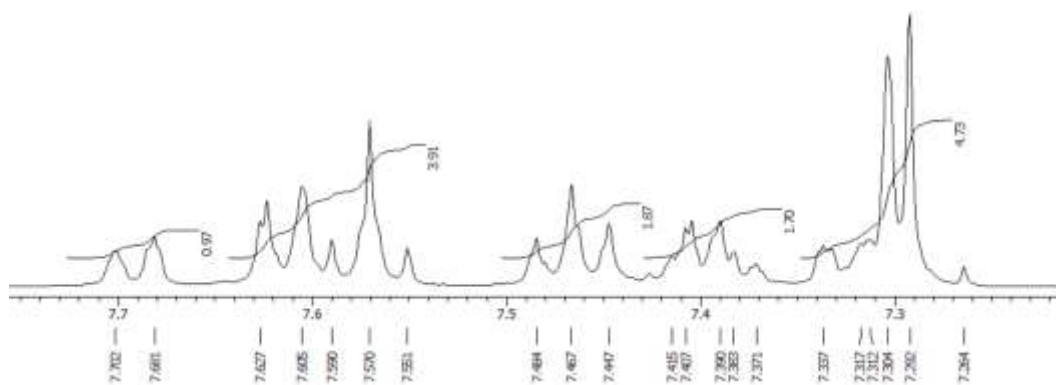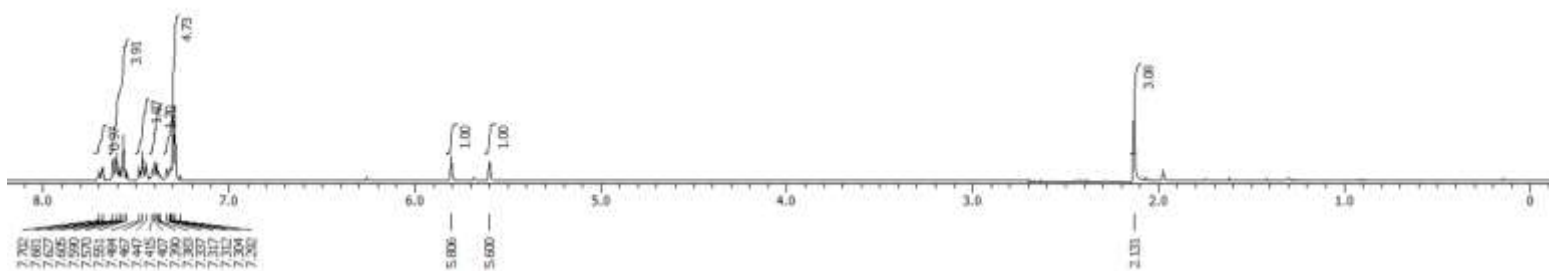

**<sup>13</sup>C NMR spectrum of 1p (100 MHz, CDCl<sub>3</sub>)**

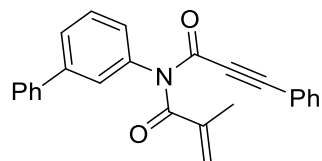

*N*-([1,1'-biphenyl]-3-yl)-*N*-(3-phenylpropiolyl)methacrylamide

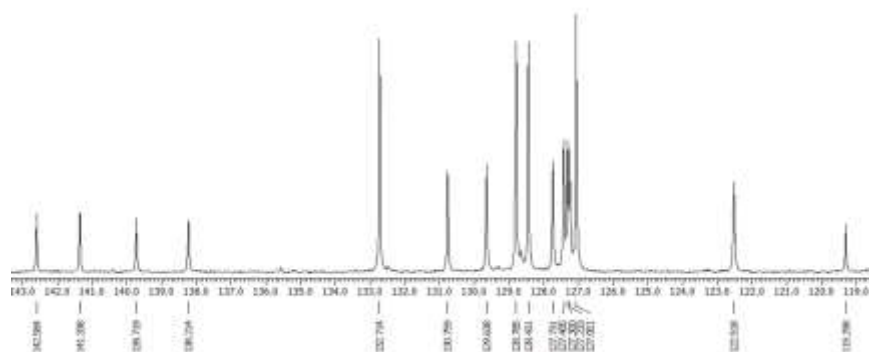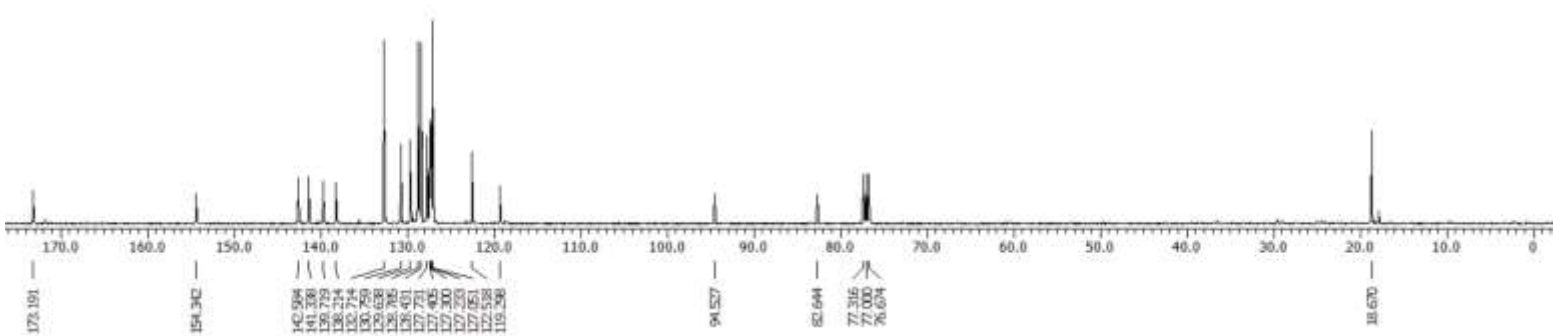

# Mass spectrum of 1p

## Qualitative Compound Report

**Data File** 357-A.d **Sample Name** 357-A  
**Sample Type** Sample **Position** PI-C1  
**Instrument Name** Instrument 1 **User Name**  
**Acq Method** MS Scan.m **Acquired Time** 03-05-2024 13:48:10  
**IRM Calibration Status** **DA Method** Default.m  
**Comment**

**Sample Group** Info. 3  
**Acquisition SW** 6200 series TOF/MS/CO series  
**Version** Q-TOF B.05.01 (B0128)

### Compound Table

| Compound Label      | RT    | Mass     | Abund  | Formula      | Totl Mass | DIFF (ppm) | MFG Formula  | DB Formula   |
|---------------------|-------|----------|--------|--------------|-----------|------------|--------------|--------------|
| Cpd 1: C25 H19 N O2 | 0.347 | 366.1423 | 628825 | C25 H19 N O2 | 366.1410  | 3.11       | C25 H19 N O2 | C25 H19 N O2 |

| Compound Label      | m/z      | RT    | Algorithm       | Mass     |
|---------------------|----------|-------|-----------------|----------|
| Cpd 1: C25 H19 N O2 | 366.1497 | 0.347 | Find by Formula | 366.1423 |

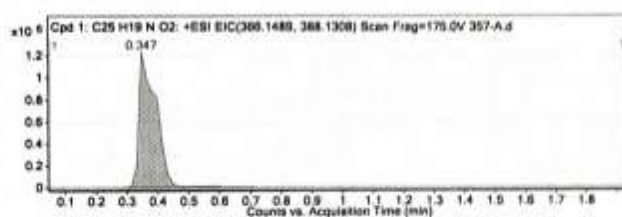

### MS Spectrum

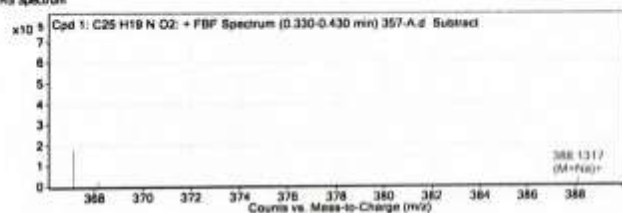

### MS Zoomed Spectrum

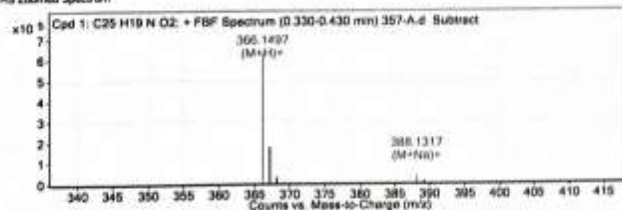

### MS Spectrum Peak List

| m/z      | z | Abund     | Formula     | Ion     |
|----------|---|-----------|-------------|---------|
| 366.1497 | 1 | 638824.94 | C25H20NO2   | (M+H)+  |
| 367.1528 | 1 | 176375.03 | C25H20NO2   | (M+H)+  |
| 368.1554 | 1 | 25977.41  | C25H20NO2   | (M+H)+  |
| 369.1581 | 1 | 2902.28   | C25H20NO2   | (M+H)+  |
| 388.1317 | 1 | 33282.09  | C25H19NNaO2 | (M+Na)+ |
| 389.1355 | 1 | 9540.02   | C25H19NNaO2 | (M+Na)+ |
| 390.1378 | 1 | 1454.76   | C25H19NNaO2 | (M+Na)+ |

--- End Of Report ---

<sup>1</sup>H NMR spectrum of 1s (400 MHz, CDCl<sub>3</sub>)

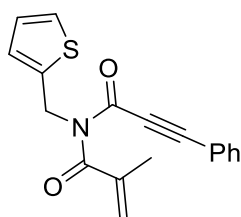

*N*-(3-phenylpropiolyl)-*N*-(thiophen-2-ylmethyl)methacrylamide

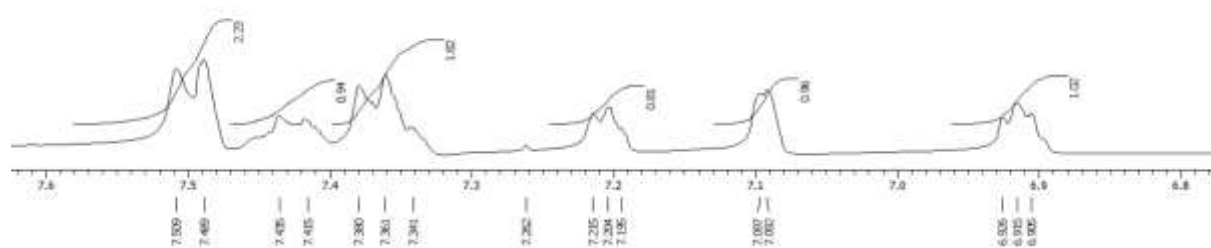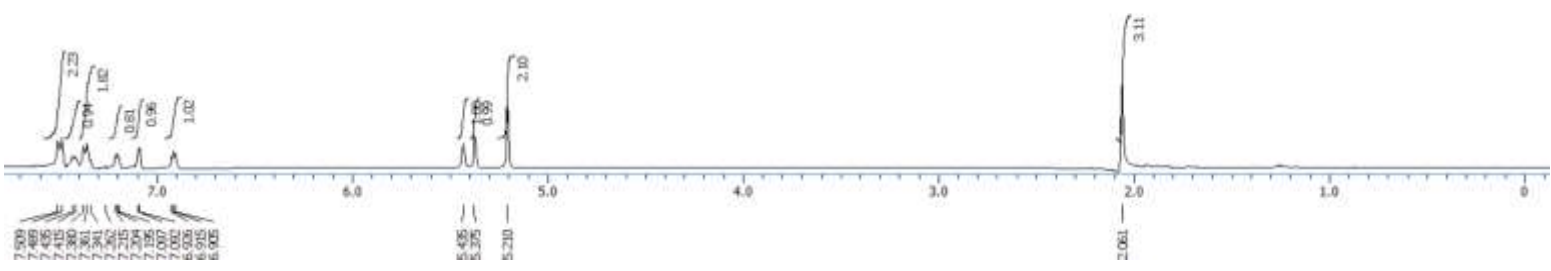

<sup>13</sup>C NMR spectrum of 1s (100 MHz, CDCl<sub>3</sub>)

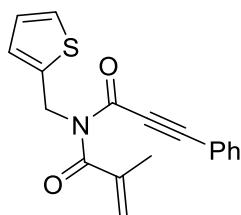

*N*-(3-phenylpropioloyl)-*N*-(thiophen-2-ylmethyl)methacrylamide

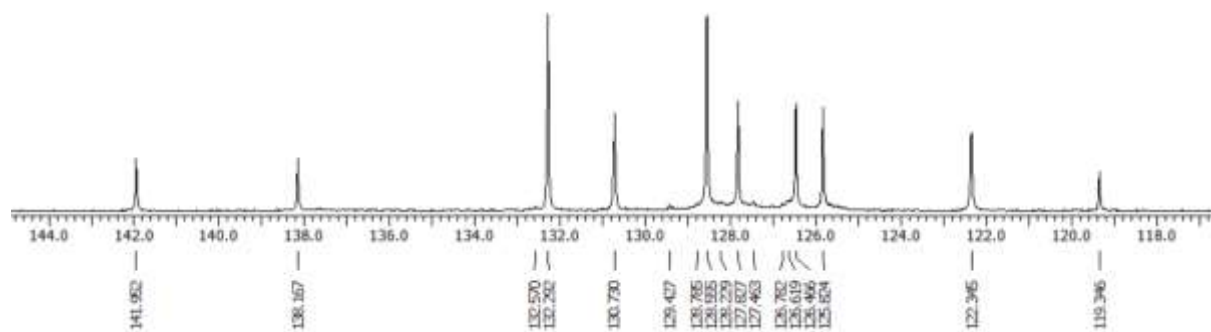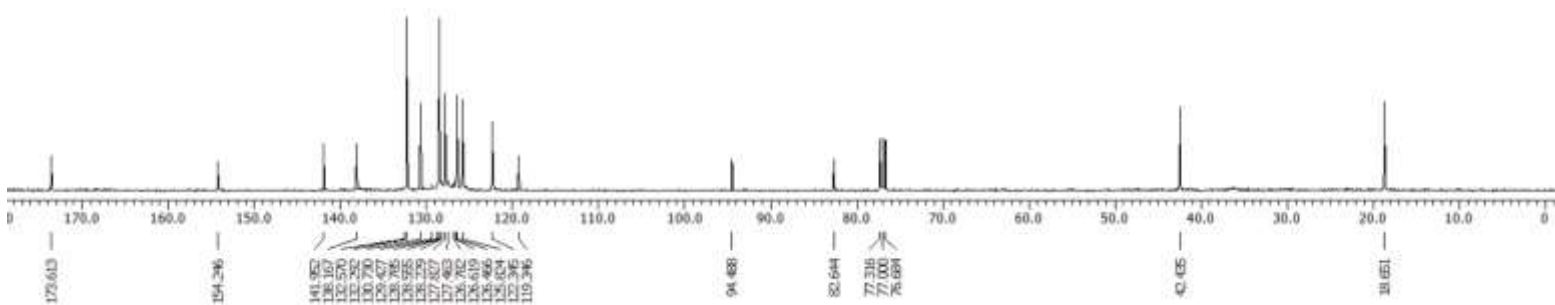

# HRMS spectrum of 1s

## Qualitative Compound Report

**Data File** 245-A.d **Sample Name** 245-A  
**Sample Type** Sample **Position** P1-B5  
**Instrument Name** Instrument 1 **User Name**  
**Acq Method** MS Scan.m **Acquired Time** 03-05-2024 13:35:07  
**IRM Calibration Status** XXXXXXXXXX **DA Method** Default.m  
**Comment**

**Sample Group** **Info** 3  
**Acquisition SW** 6200 series TOF/6500 series  
**Version** Q-TOF 9.05.01 (R5125)

### Compound Table

| Compound Label        | RT    | Mass     | Abund | Formula        | Tgt Mass | Diff (ppm) | MFG Formula    | DB Formula     |
|-----------------------|-------|----------|-------|----------------|----------|------------|----------------|----------------|
| Cpd 1: C18 H15 N O2 S | 1.401 | 309.0834 | 2346  | C18 H15 N O2 S | 309.0833 | 3.47       | C18 H15 N O2 S | C18 H15 N O2 S |

| Compound Label        | m/z      | RT    | Algorithm       | Mass     |
|-----------------------|----------|-------|-----------------|----------|
| Cpd 1: C18 H15 N O2 S | 310.0899 | 1.401 | Find By Formula | 309.0834 |

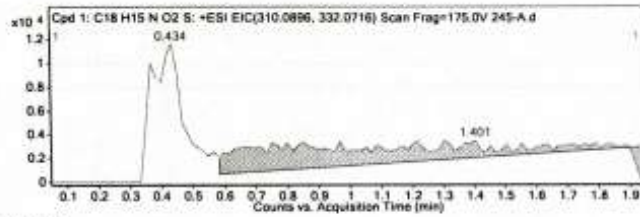

### MS Spectrum

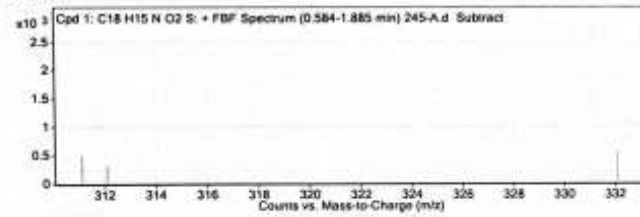

### MS Zoomed Spectrum

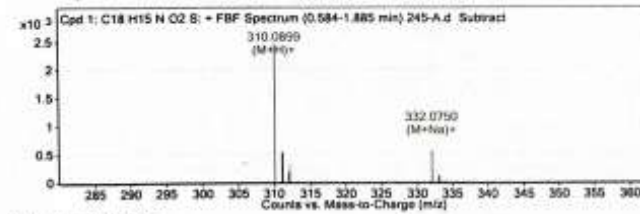

### MS Spectrum Peak List

| m/z      | z | Abund   | Formula      | Ion     |
|----------|---|---------|--------------|---------|
| 310.0899 | 1 | 2346.48 | C18H16NO2S   | (M+H)+  |
| 311.0936 | 1 | 498.29  | C18H16NO2S   | (M+H)+  |
| 312.0912 | 1 | 316.06  | C18H16NO2S   | (M+H)+  |
| 332.0751 | 1 | 556.16  | C18H15NNaO2S | (M+Na)+ |
| 333.0779 | 1 | 122.65  | C18H15NNaO2S | (M+Na)+ |

-- End Of Report --

<sup>1</sup>H NMR spectrum of 1t (400 MHz, DMSO-*d*<sub>6</sub>)

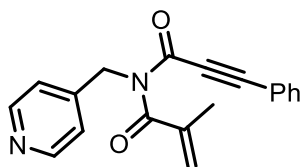

*N*-(3-phenylpropiolyl)-*N*-(pyridin-4-ylmethyl)methacrylamide

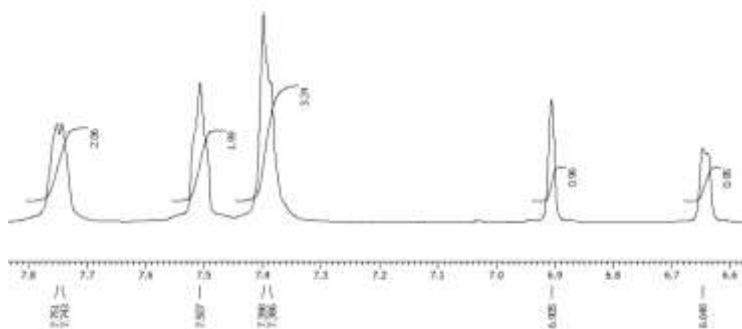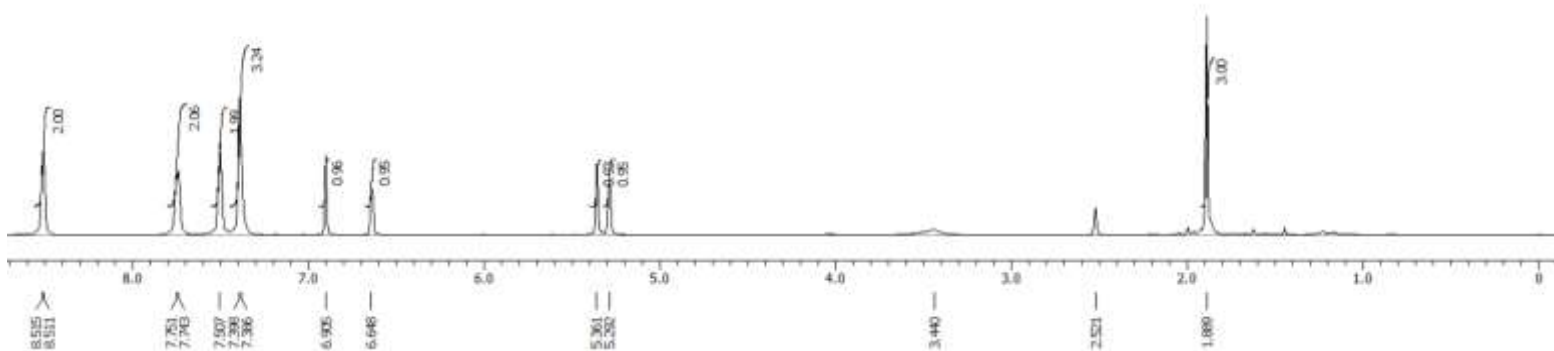

<sup>13</sup>C NMR spectrum of 1t (100 MHz, DMSO-*d*<sub>6</sub>)



*N*-(3-phenylpropioloyl)-*N*-(pyridin-4-ylmethyl)methacrylamide

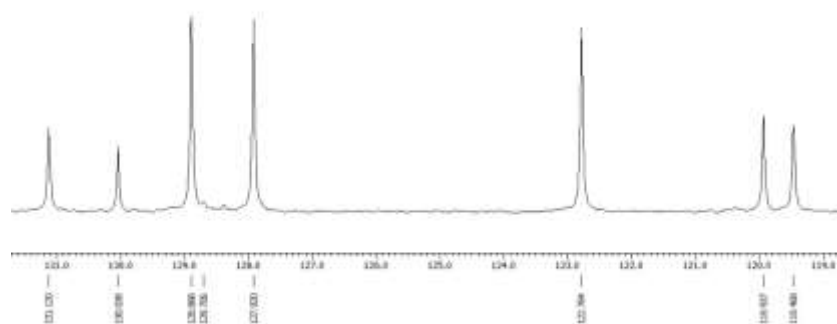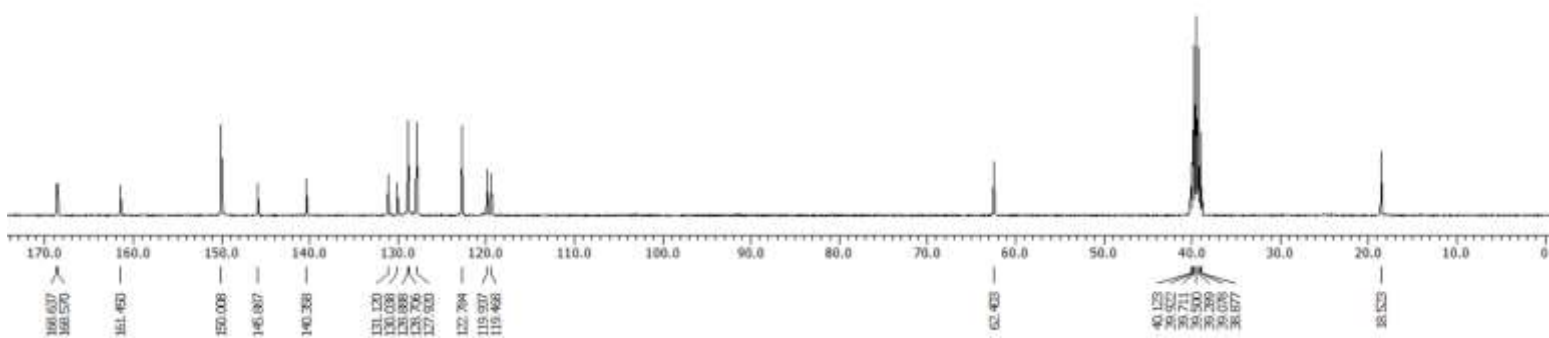



# HRMS spectrum of 1t

|                    |                 |                               |         |                        |                                 |
|--------------------|-----------------|-------------------------------|---------|------------------------|---------------------------------|
| <b>Sample Name</b> | SMT 259(A)      | <b>Position</b>               | P1-A7   | <b>Instrument Name</b> | BIOQTOF                         |
| <b>User Name</b>   | SYSTEM (SYSTEM) | <b>Inj Vol</b>                | 1       | <b>InjPosition</b>     |                                 |
| <b>Sample Type</b> | Sample          | <b>IRM Calibration Status</b> | Success | <b>Data Filename</b>   | SMT 259(A).d                    |
| <b>ACQ Method</b>  | Pos_100ACN.m    | <b>Comment</b>                |         | <b>Acquired Time</b>   | 27-04-2024 12:03:59 (UTC+05:30) |

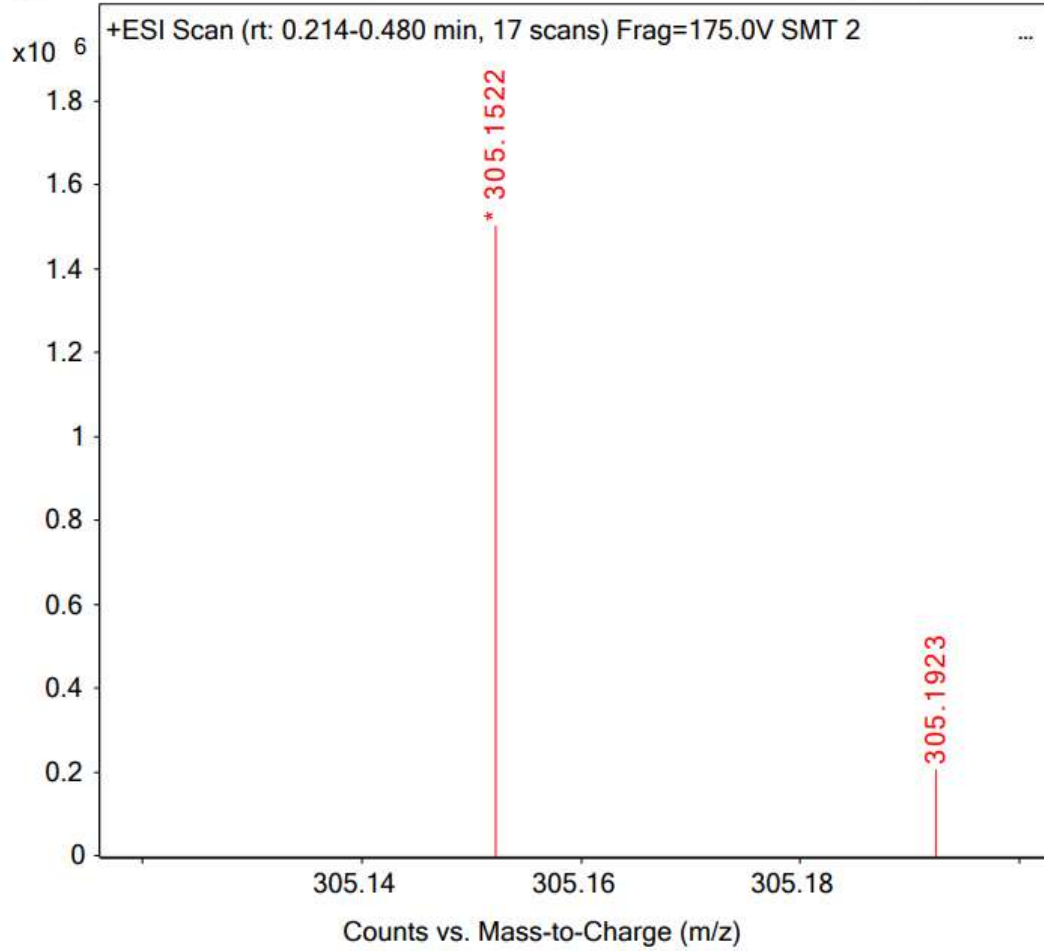

<sup>1</sup>H NMR spectrum of 1u (400 MHz, CDCl<sub>3</sub>)

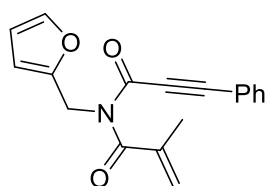

*N*-(furan-2-ylmethyl)-*N*-(3-phenylpropioloyl)methacrylamide

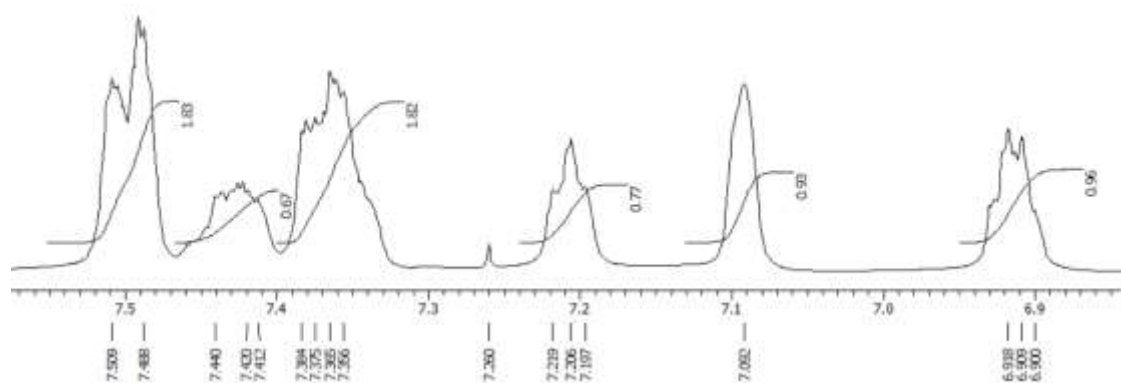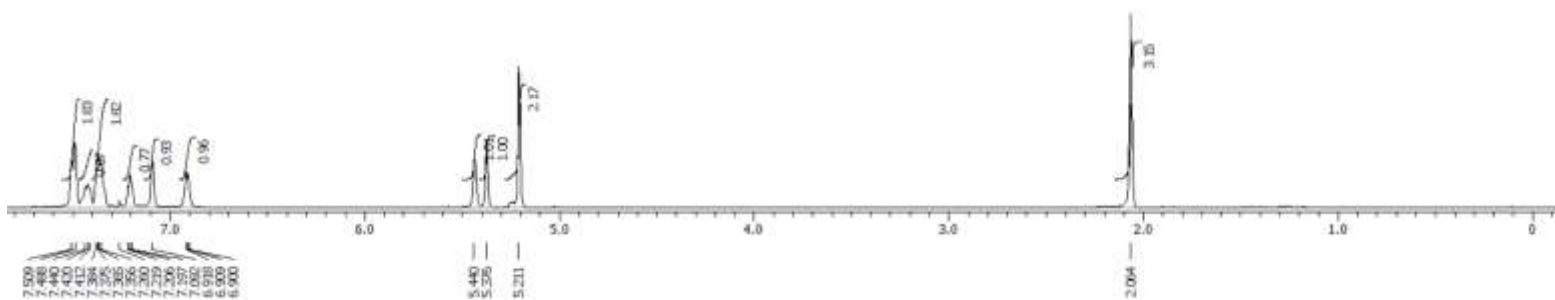

<sup>13</sup>C NMR spectrum of 1u (100 MHz, CDCl<sub>3</sub>)

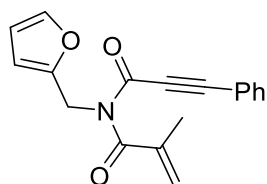

*N*-(furan-2-ylmethyl)-*N*-(3-phenylpropioloyl)methacrylamide

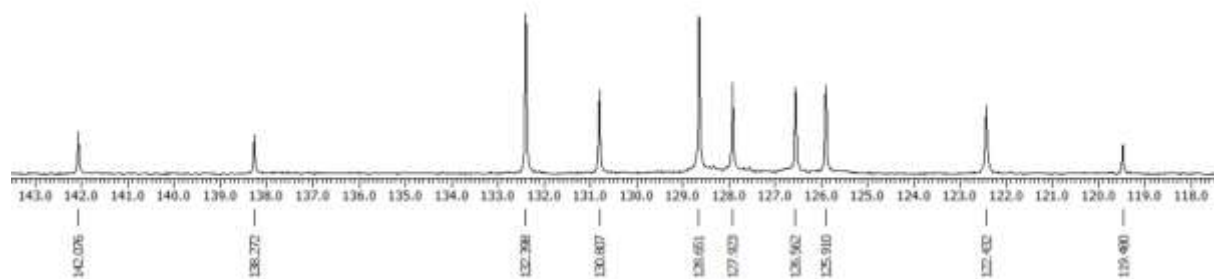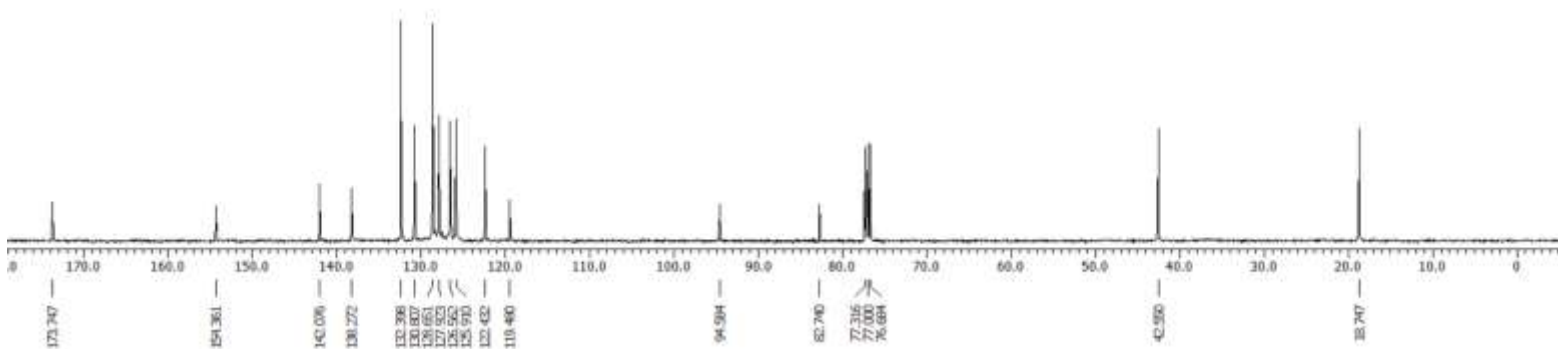

# HRMS spectrum of 1u

## Qualitative Compound Report

|                               |              |                      |                     |
|-------------------------------|--------------|----------------------|---------------------|
| <b>Data File</b>              | ST-246-A.d   | <b>Sample Name</b>   | ST-246-A            |
| <b>Sample Type</b>            | Sample       | <b>Position</b>      | F1-A7               |
| <b>Instrument Name</b>        | Instrument 1 | <b>User Name</b>     |                     |
| <b>Acq Method</b>             | MS Scan.m    | <b>Acquired Time</b> | 11-05-2024 12:23:38 |
| <b>IRM Calibration Status</b> | Success      | <b>DA Method</b>     | Default.m           |
| <b>Comment</b>                |              |                      |                     |

|                               |                                                   |              |   |
|-------------------------------|---------------------------------------------------|--------------|---|
| <b>Sample Group</b>           |                                                   | <b>Info.</b> | 3 |
| <b>Acquisition SW Version</b> | 6200 series TOF/6500 series Q-TOF B.05.01 (85123) |              |   |

### Compound Table

| Compound Label      | RT    | Mass     | Abund | Formula      | Tgt Mass | Diff (ppm) | MFG Formula  | DB Formula   |
|---------------------|-------|----------|-------|--------------|----------|------------|--------------|--------------|
| Cpd 1: C18 H15 N O3 | 0.501 | 293.1066 | 95314 | C18 H15 N O3 | 293.1052 | 4.89       | C18 H15 N O3 | C18 H15 N O3 |

| Compound Label      | m/z      | RT    | Algorithm       | Mass     |
|---------------------|----------|-------|-----------------|----------|
| Cpd 1: C18 H15 N O3 | 316.0957 | 0.501 | Find By Formula | 293.1066 |

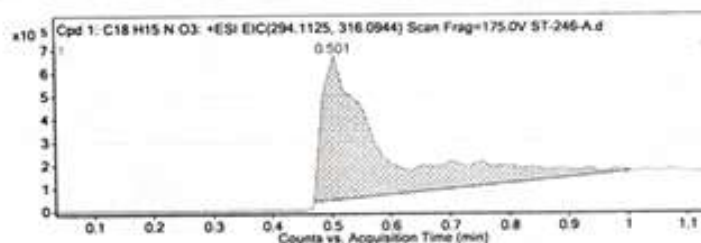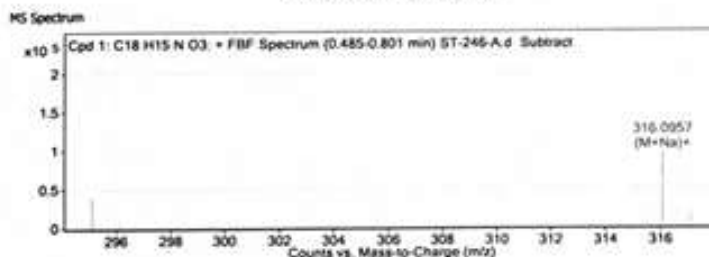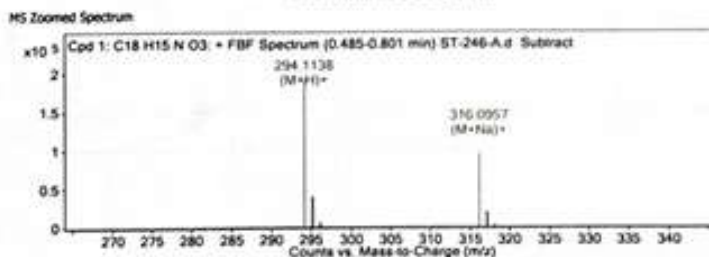

| m/z      | z | Abund     | Formula     | Ion     |
|----------|---|-----------|-------------|---------|
| 294.1138 | 1 | 189636.41 | C18H16NO3   | (M+H)+  |
| 295.1176 | 1 | 40339.96  | C18H16NO3   | (M+H)+  |
| 296.1213 | 1 | 5406.94   | C18H16NO3   | (M+H)+  |
| 297.1275 | 1 | 633.02    | C18H16NO3   | (M+H)+  |
| 316.0957 | 1 | 95314.3   | C18H15NNaO3 | (M+Na)+ |
| 317.0993 | 1 | 18664.03  | C18H15NNaO3 | (M+Na)+ |
| 318.1036 | 1 | 2517.46   | C18H15NNaO3 | (M+Na)+ |

--- End Of Report ---

**<sup>1</sup>H NMR spectrum of 1v (400 MHz, CDCl<sub>3</sub>)**

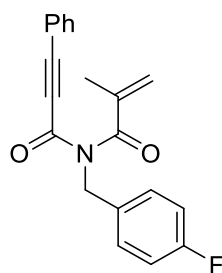

*N*-(4-fluorobenzyl)-*N*-(3-phenylpropioloyl)methacrylamide

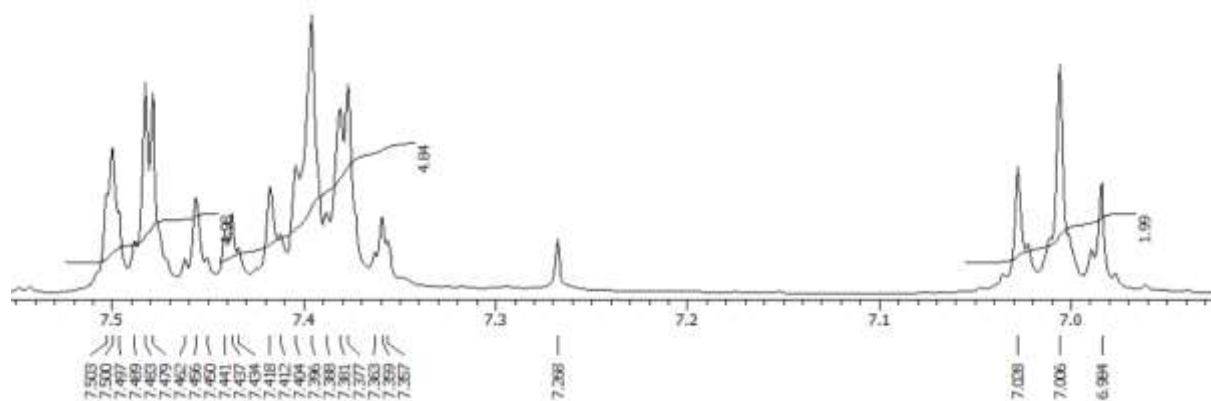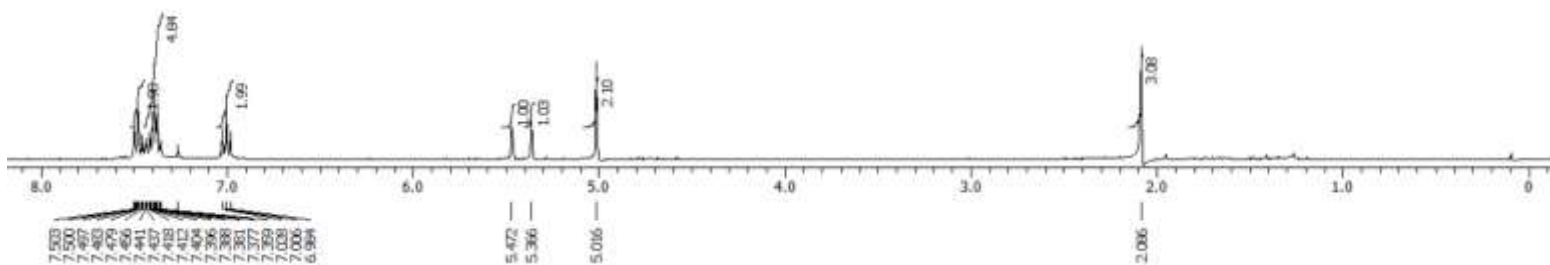

<sup>13</sup>C NMR spectrum of 1v (100 MHz, CDCl<sub>3</sub>)



*N*-(4-fluorobenzyl)-*N*-(3-phenylpropioloyl)methacrylamide

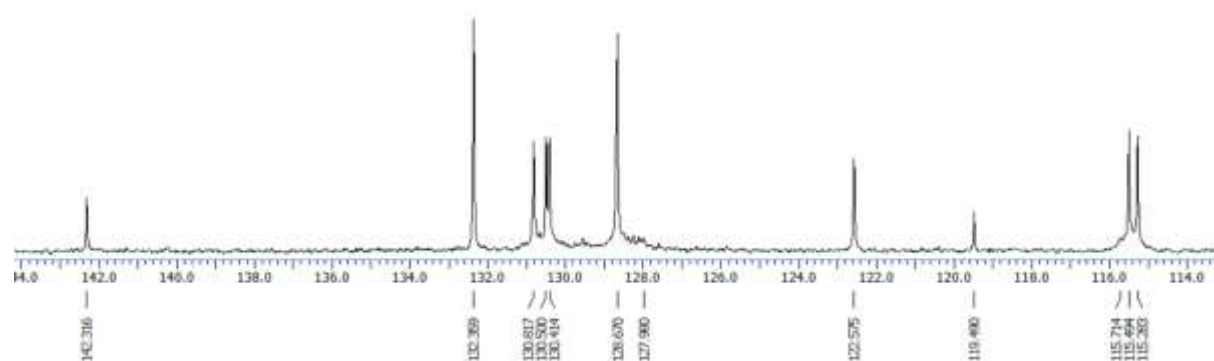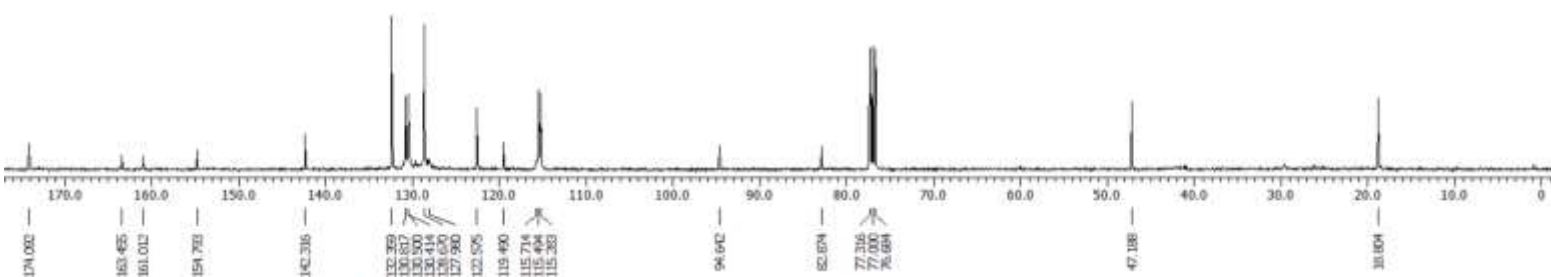

**<sup>19</sup>F NMR spectrum of 1v (100 MHz, CDCl<sub>3</sub>)**

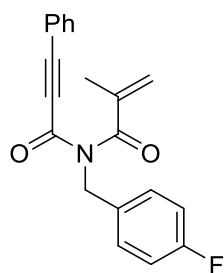

*N*-(4-fluorobenzyl)-*N*-(3-phenylpropioloyl)methacrylamide

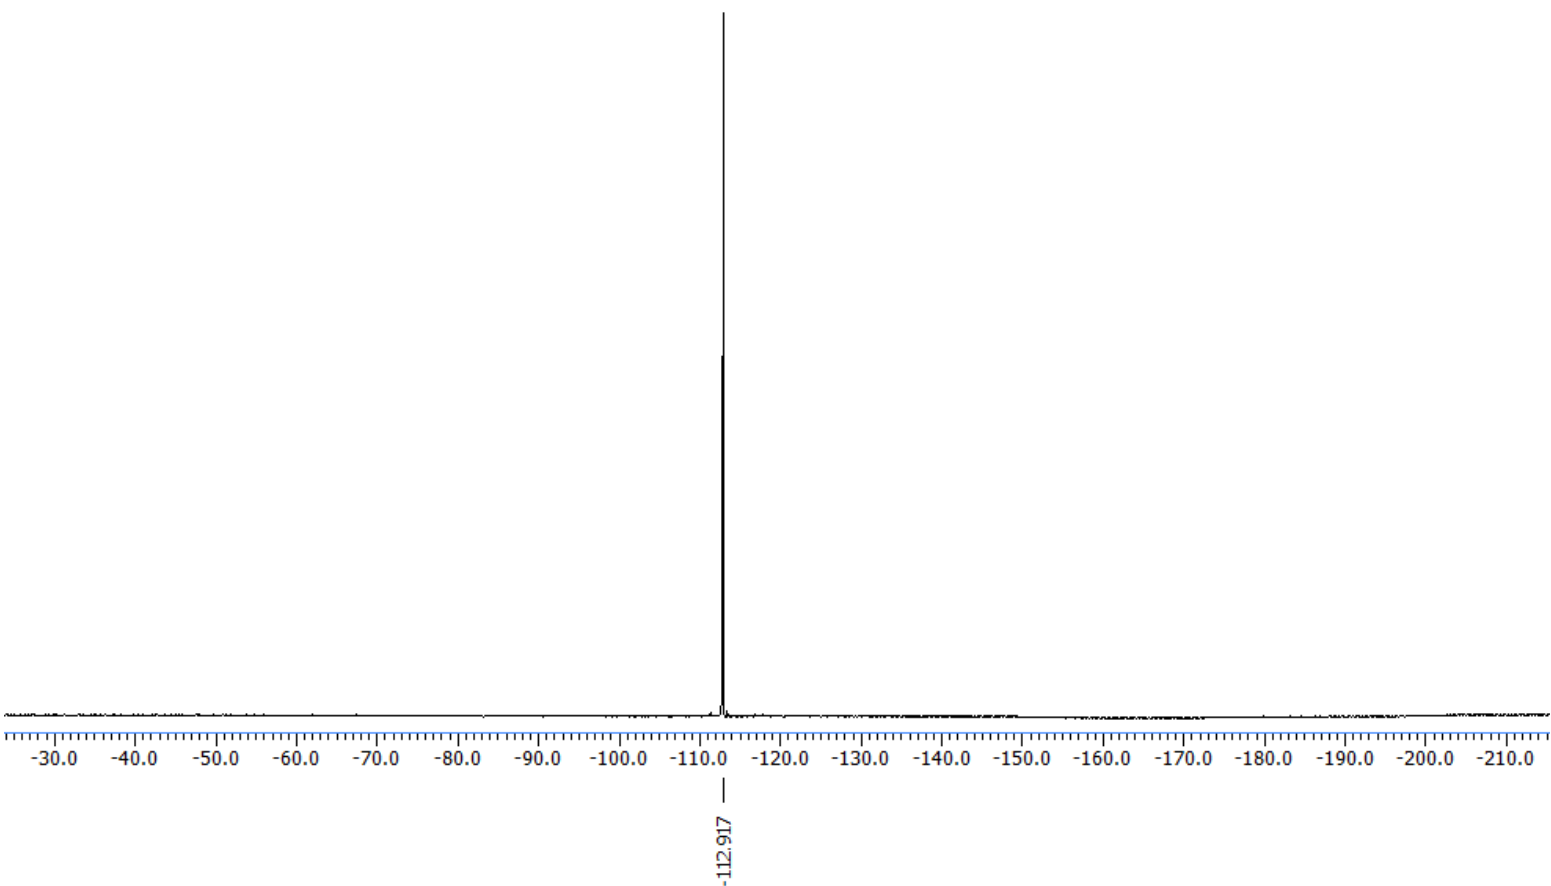

# Mass spectrum of 1v

## Qualitative Compound Report

**Data File** 331-A.d **Sample Name** 331-A  
**Sample Type** Sample **Position** P1-C3  
**Instrument Name** Instrument 1 **User Name**  
**Acq Method** MS Scan.m **Acquired Time** 03-05-2024 16:18:17  
**IRM Calibration Status** **DA Method** Default.m  
**Comment**

**Sample Group** Info 3  
**Acquisition SW** 6300 series TOF/6300 series  
**Version** Q-TOF B.05.01 (85125)

### Compound Table

| Compound Label        | RT    | Mass     | Abund | Formula        | Tgt Mass | Diff (ppm) | HFG Formula    | DB Formula     |
|-----------------------|-------|----------|-------|----------------|----------|------------|----------------|----------------|
| Cpd 1: C20 H16 F N O2 | 0.411 | 321.1152 | 25446 | C20 H16 F N O2 | 321.1165 | -4         | C20 H16 F N O2 | C20 H16 F N O2 |

| Compound Label        | m/z      | RT    | Algorithm       | Mass     |
|-----------------------|----------|-------|-----------------|----------|
| Cpd 1: C20 H16 F N O2 | 322.1242 | 0.411 | Find By Formula | 321.1152 |

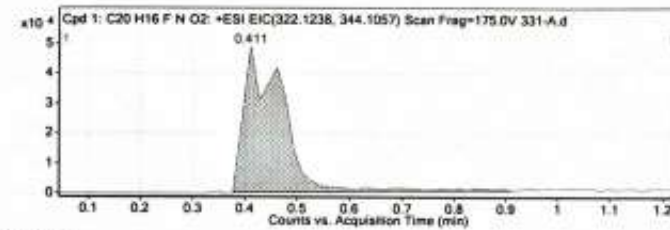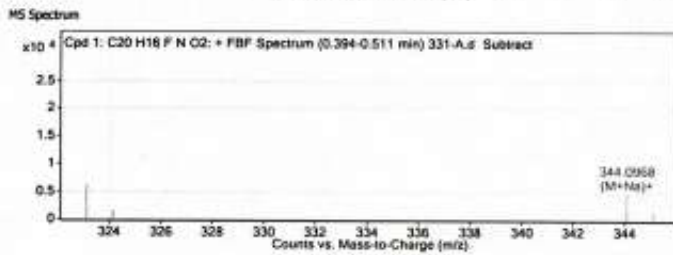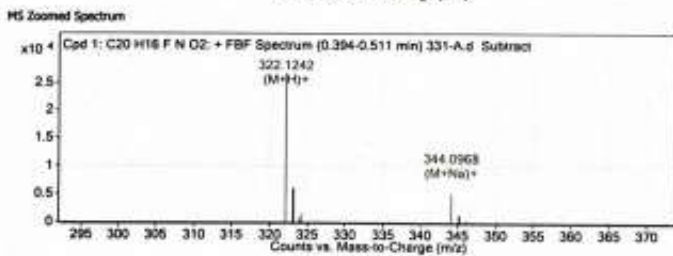

### MS Spectrum Peak List

| m/z      | z | Abund    | Formula      | Ion                 |
|----------|---|----------|--------------|---------------------|
| 322.1242 | 1 | 25445.97 | C20H17FWO2   | [M+H] <sup>+</sup>  |
| 323.1285 | 1 | 6285.22  | C20H17FWO2   | [M+H] <sup>+</sup>  |
| 324.1229 | 1 | 1729.27  | C20H17FWO2   | [M+H] <sup>+</sup>  |
| 344.0968 | 1 | 4901.5   | C20H16FNNaO2 | [M+Na] <sup>+</sup> |
| 345.1004 | 1 | 1368.83  | C20H16FNNaO2 | [M+Na] <sup>+</sup> |
| 346.0998 | 1 | 160.6    | C20H16FNNaO2 | [M+Na] <sup>+</sup> |

--- End Of Report ---



<sup>1</sup>H NMR spectrum of 1y (400 MHz, CDCl<sub>3</sub>)

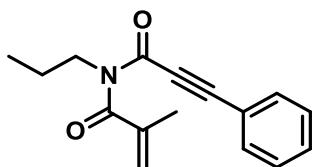

*N*-(3-phenylpropioyl)-*N*-propylmethacrylamide

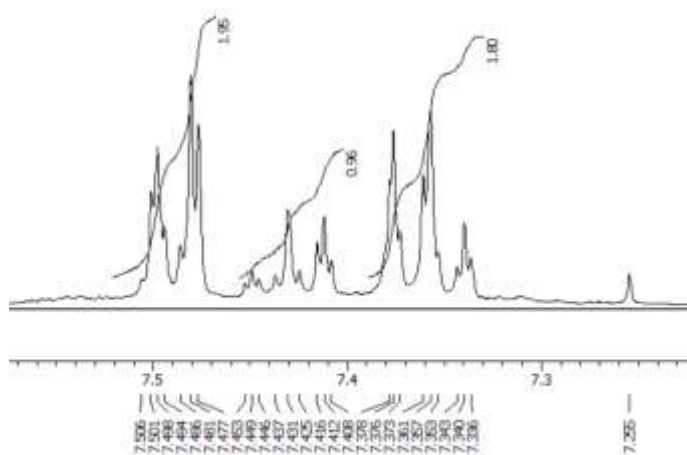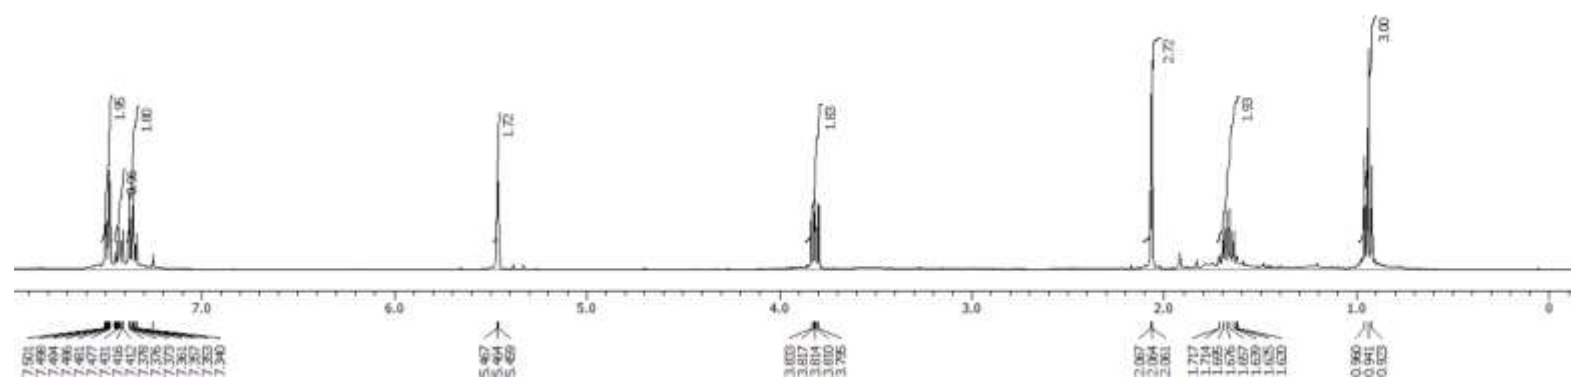

<sup>13</sup>C NMR spectrum of 1y (100 MHz, CDCl<sub>3</sub>)

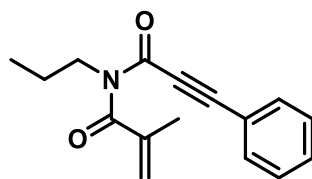

*N*-(3-phenylpropioloyl)-*N*-propylmethacrylamide

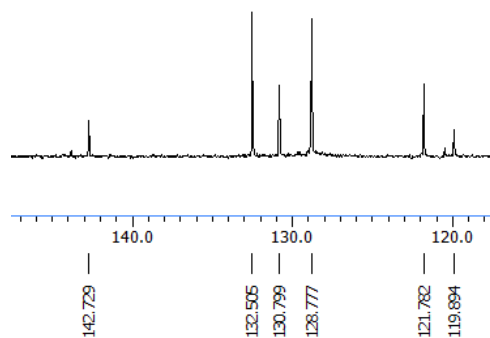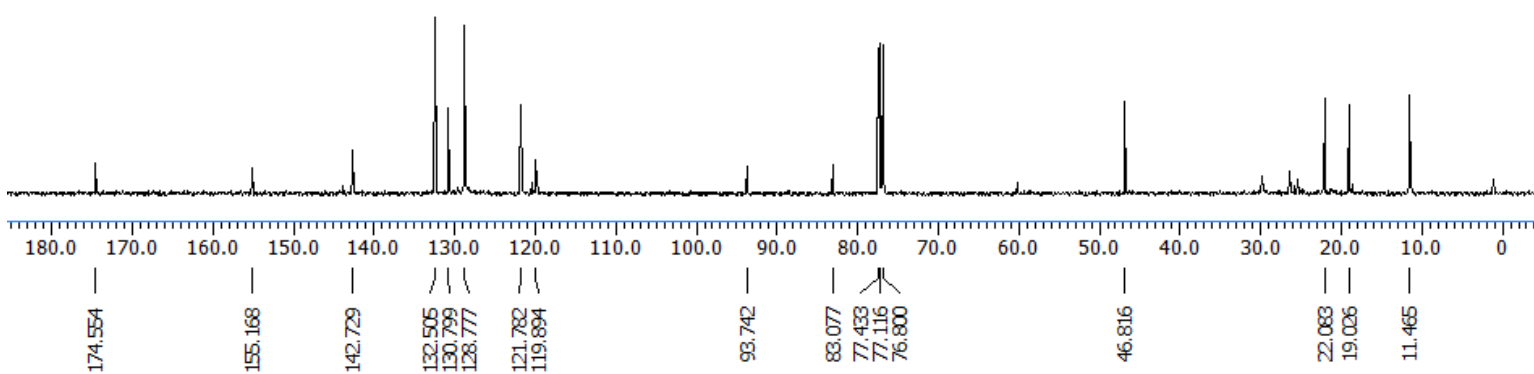

### Mass spectrum of 1y



*N*-(3-phenylpropioloyl)-*N*-propylmethacrylamide

#### MFE MS Spectrum

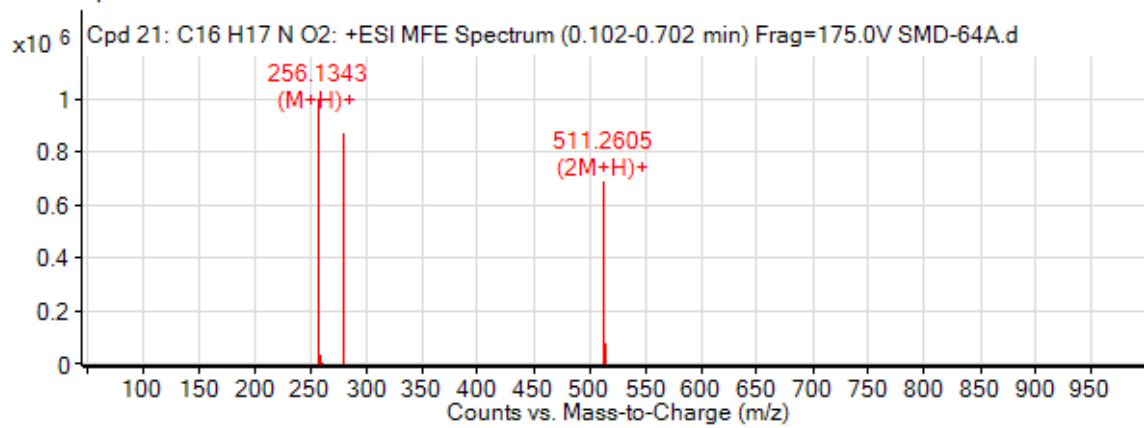

#### MFE MS Zoomed Spectrum

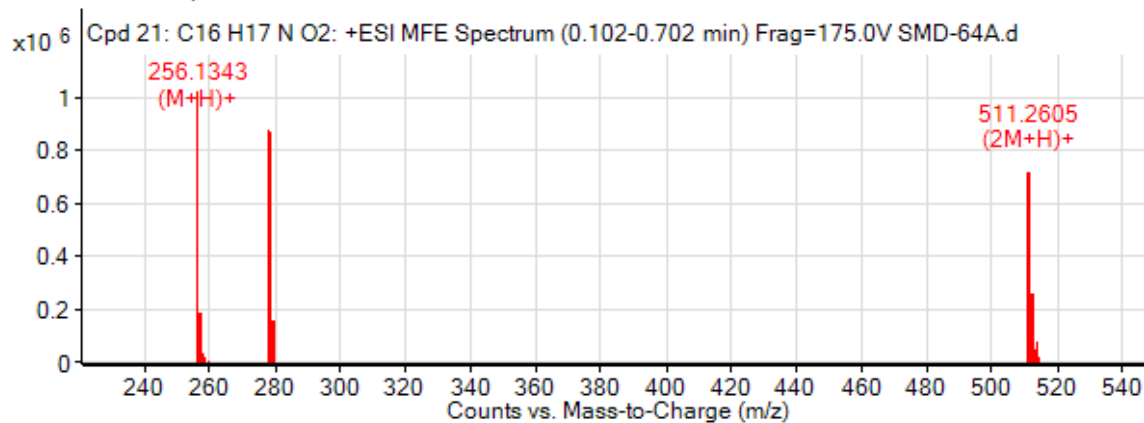

**<sup>1</sup>H NMR spectrum of 1z (400 MHz, CDCl<sub>3</sub>)**

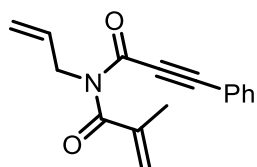

*N*-allyl-*N*-(3-phenylpropioloyl)methacrylamide

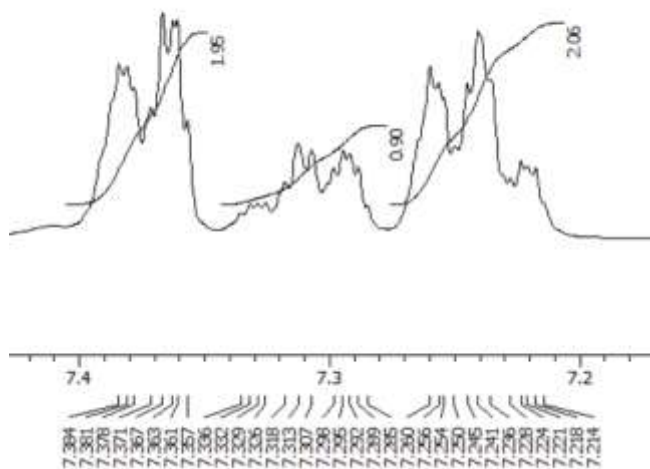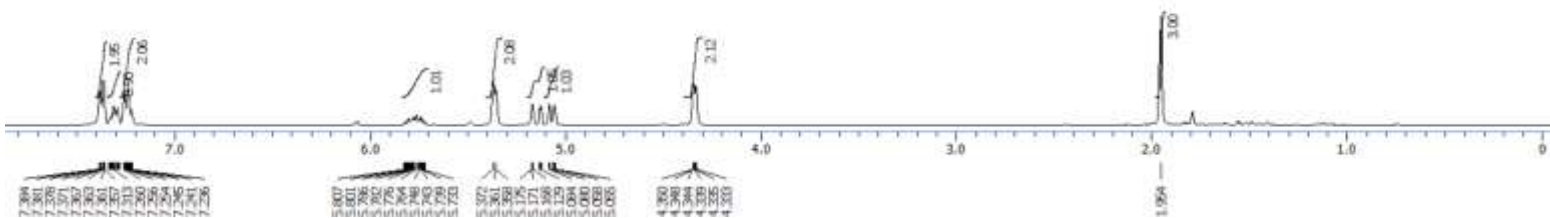

<sup>13</sup>C NMR spectrum of 1z (100 MHz, CDCl<sub>3</sub>)



*N*-allyl-*N*-(3-phenylpropioloyl)methacrylamide

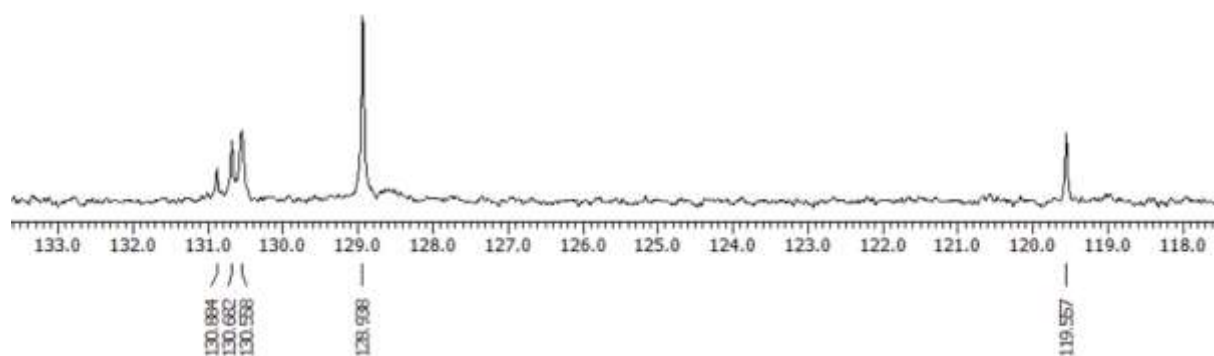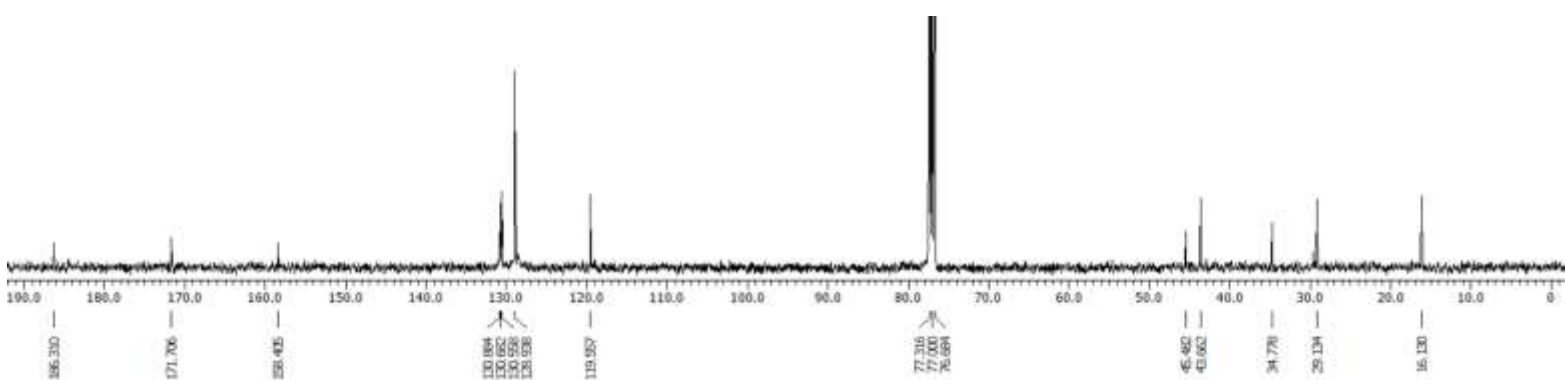

# HRMS spectrum of 1z

|                    |                 |                               |         |                        |                                 |
|--------------------|-----------------|-------------------------------|---------|------------------------|---------------------------------|
| <b>Sample Name</b> | SMT 288(A)      | <b>Position</b>               | P1-A6   | <b>Instrument Name</b> | BIOQTOF                         |
| <b>User Name</b>   | SYSTEM (SYSTEM) | <b>Inj Vol</b>                | 1       | <b>InjPosition</b>     |                                 |
| <b>Sample Type</b> | Sample          | <b>IRM Calibration Status</b> | Success | <b>Data Filename</b>   | SMT 288(A).d                    |
| <b>ACQ Method</b>  | Pos_100ACN.m    | <b>Comment</b>                |         | <b>Acquired Time</b>   | 27-04-2024 12:00:09 (UTC+05:30) |

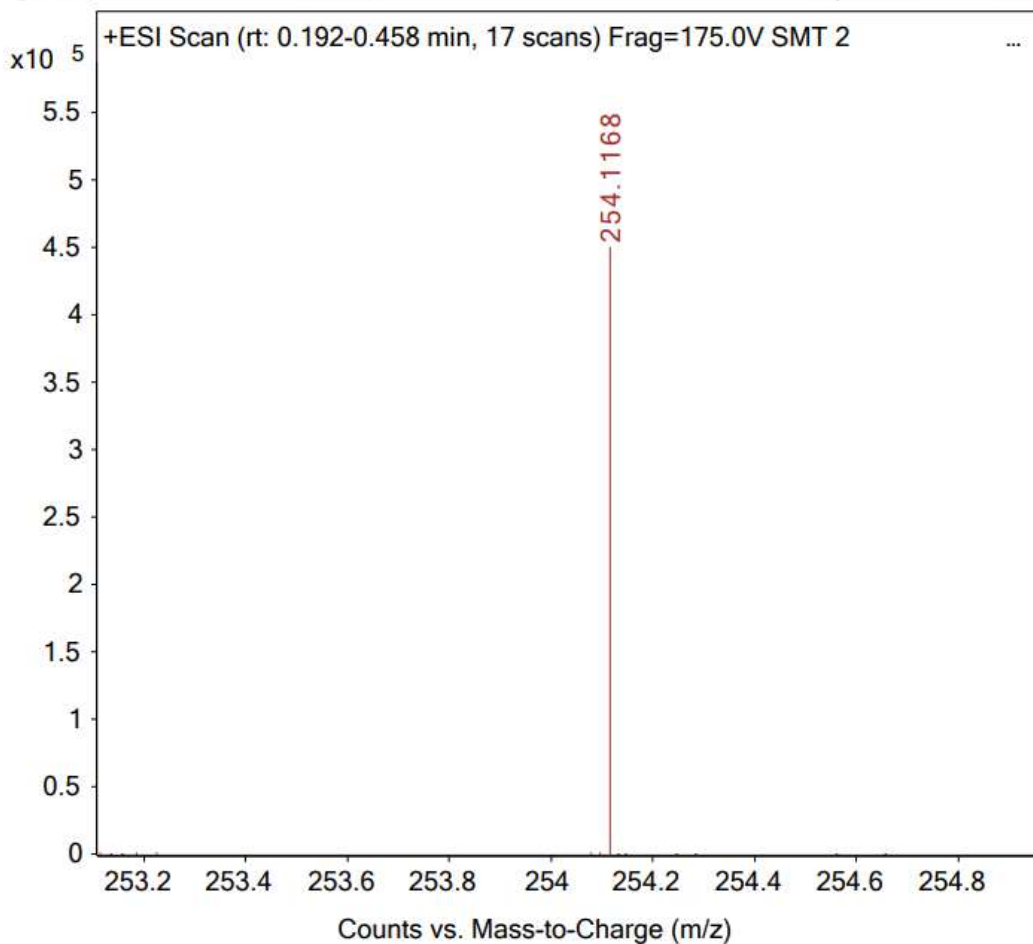

<sup>1</sup>H NMR spectrum of 1aa (400 MHz, CDCl<sub>3</sub>)

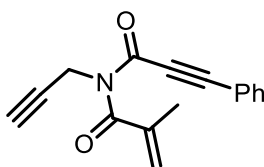

*N*-(3-phenylpropiolyl)-*N*-(prop-2-yn-1-yl)methacrylamide

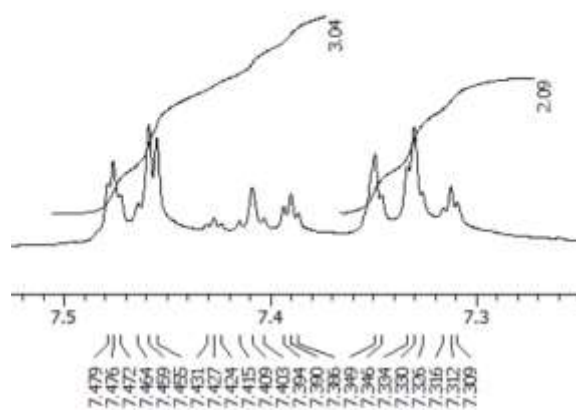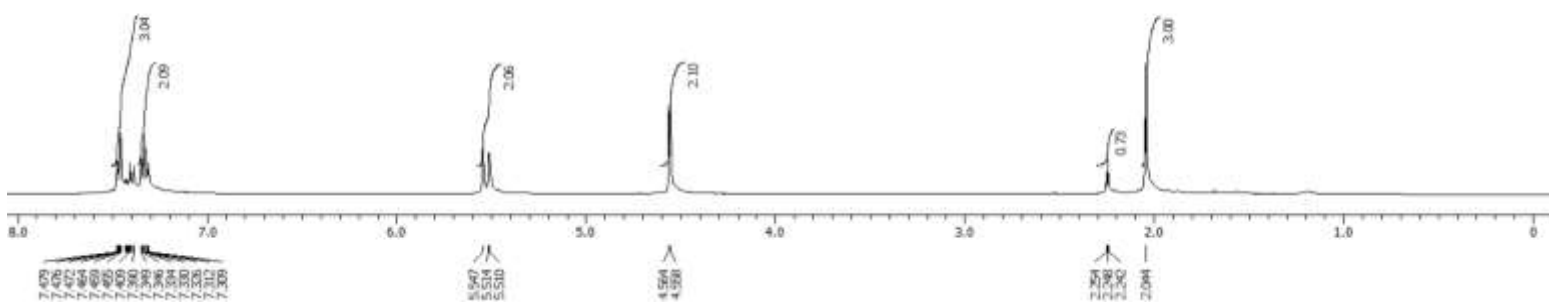

**<sup>13</sup>C NMR spectrum of 1aa (100 MHz, CDCl<sub>3</sub>)**

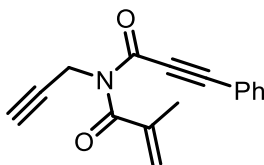

*N*-(3-phenylpropiolyl)-*N*-(prop-2-yn-1-yl)methacrylamide

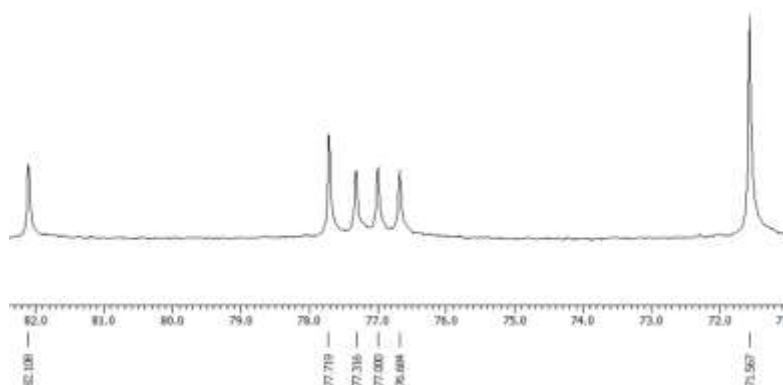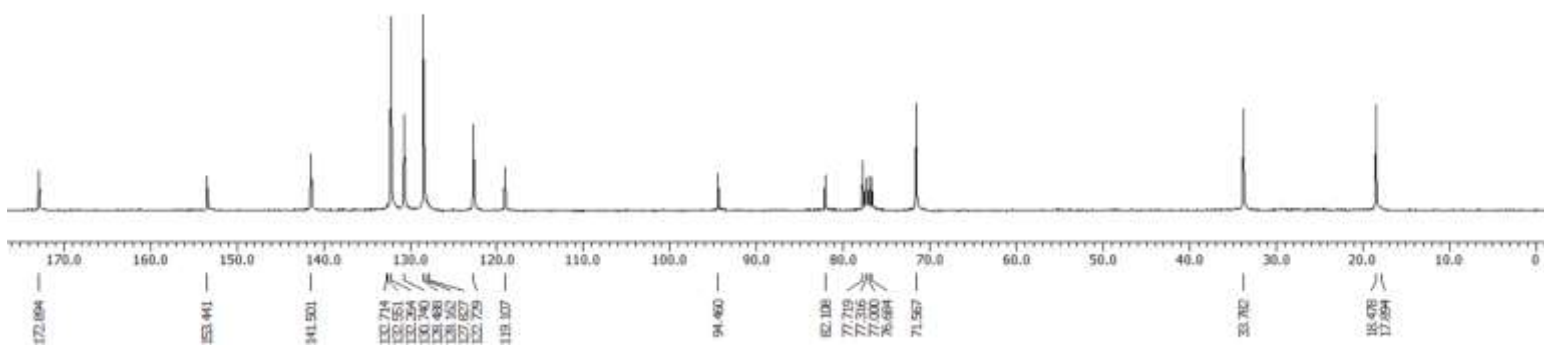



# HRMS spectrum of 1aa

|                    |                 |                               |         |                        |                                 |
|--------------------|-----------------|-------------------------------|---------|------------------------|---------------------------------|
| <b>Sample Name</b> | SMT 268(A)      | <b>Position</b>               | P1-C7   | <b>Instrument Name</b> | BIOQTOF                         |
| <b>User Name</b>   | SYSTEM (SYSTEM) | <b>Inj Vol</b>                | 1       | <b>InjPosition</b>     |                                 |
| <b>Sample Type</b> | Sample          | <b>IRM Calibration Status</b> | Success | <b>Data Filename</b>   | SMT 268(A).d                    |
| <b>ACQ Method</b>  | Pos_100ACN.m    | <b>Comment</b>                |         | <b>Acquired Time</b>   | 27-04-2024 13:29:05 (UTC+05:30) |

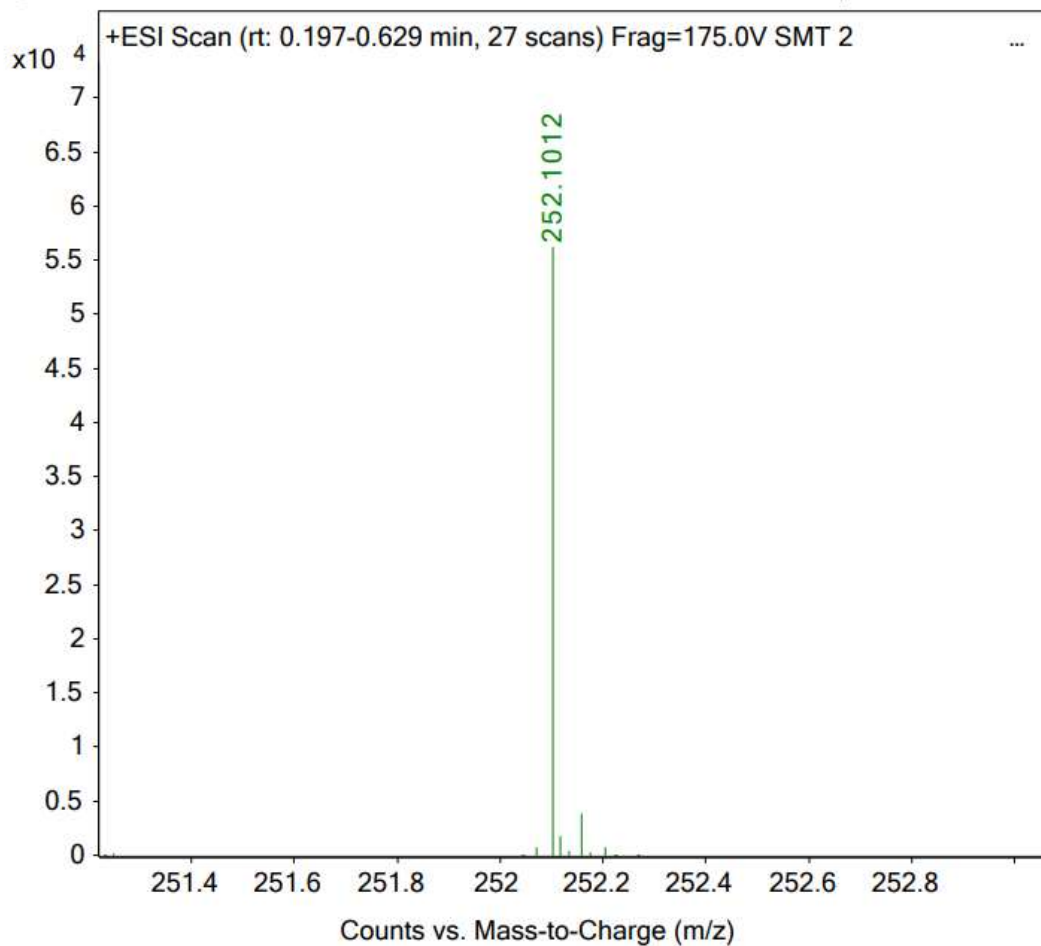

<sup>1</sup>H NMR spectrum of 1ab (400 MHz, CDCl<sub>3</sub>)

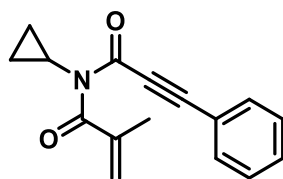

N-cyclopropyl-N-(3-phenylpropioyl)methacrylamide

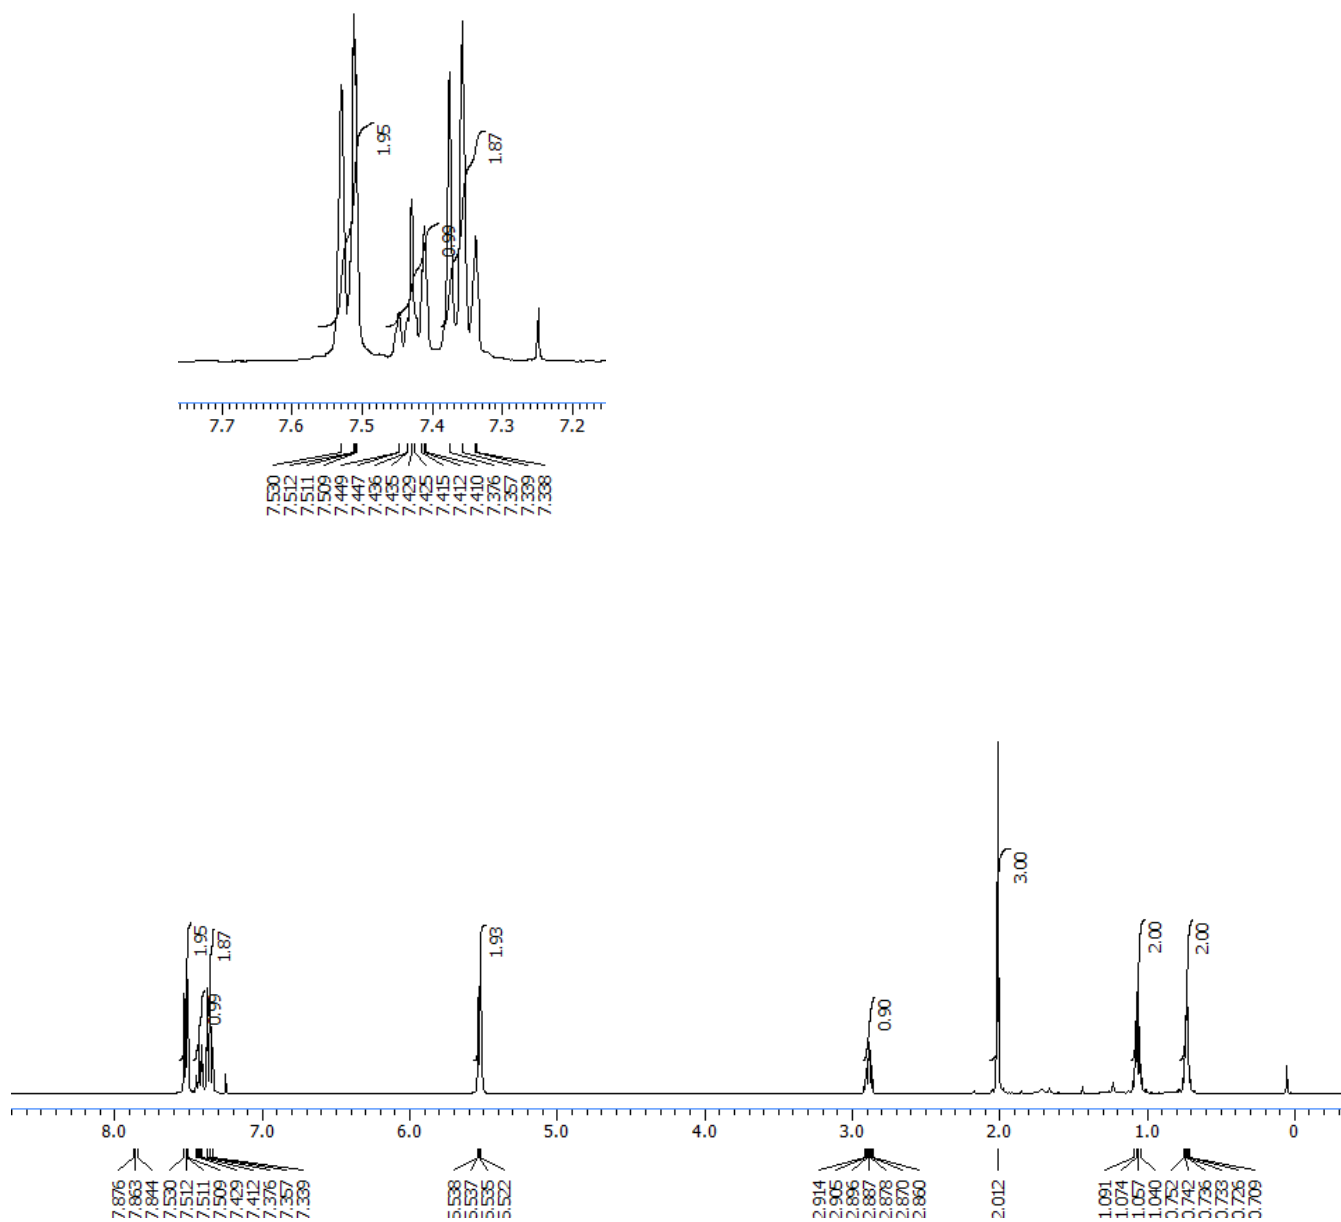

**<sup>13</sup>C NMR spectrum of 1ab (100 MHz, CDCl<sub>3</sub>)**

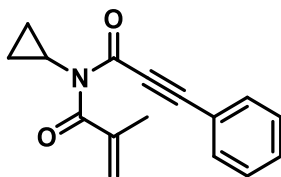

N-cyclopropyl-N-(3-phenylpropioloyl)methacrylamide

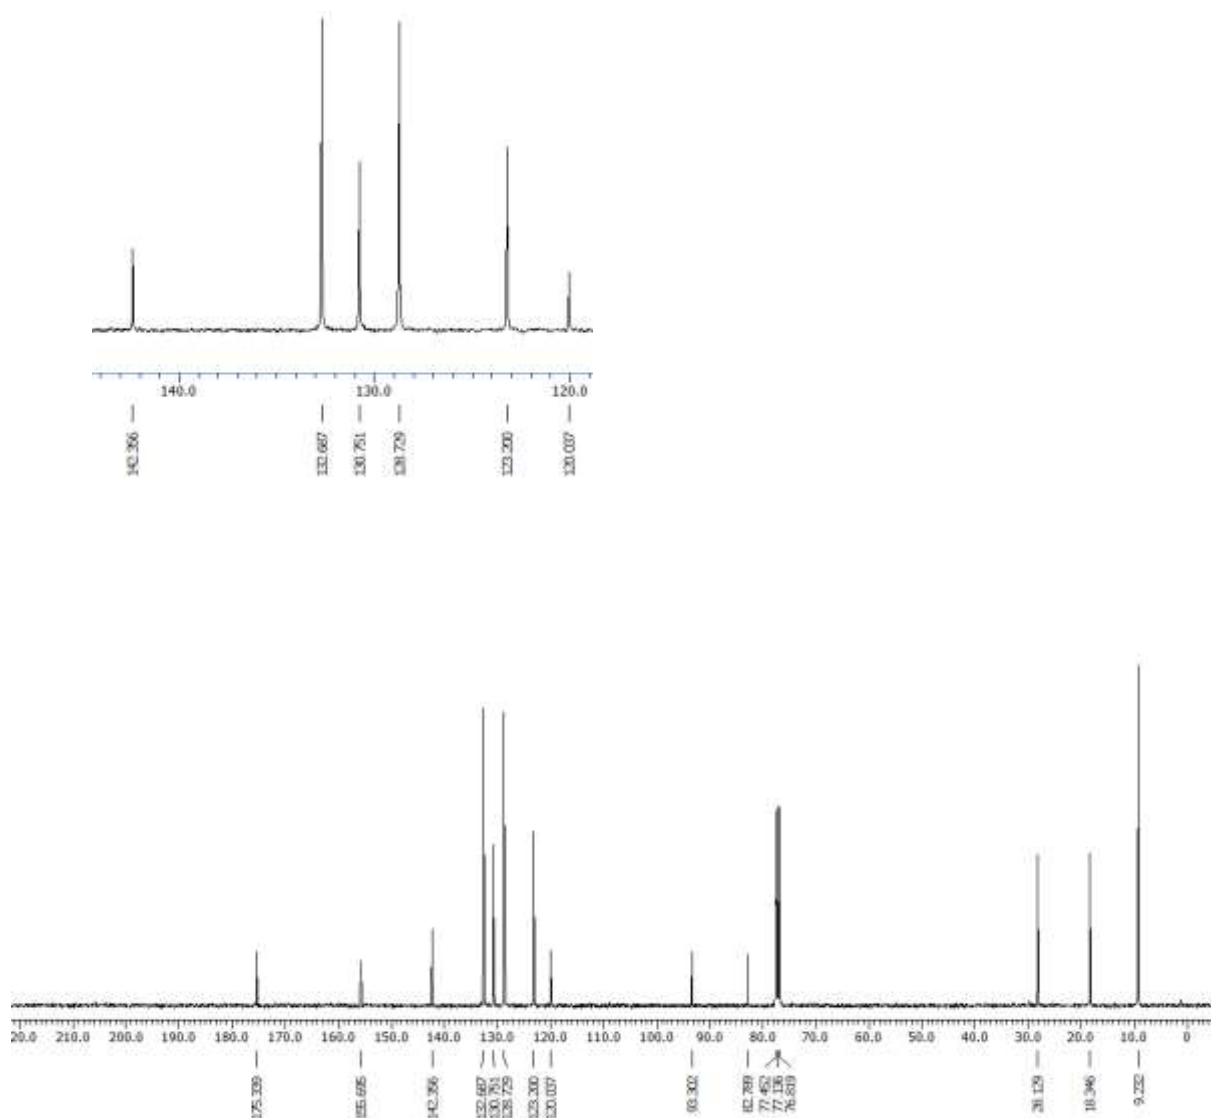

### Mass Spectrum of 1ab

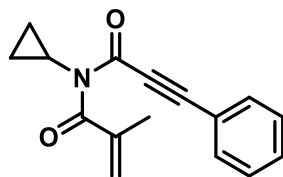

N-cyclopropyl-N-(3-phenylpropioloyl)methacrylamide

#### MFE MS Spectrum

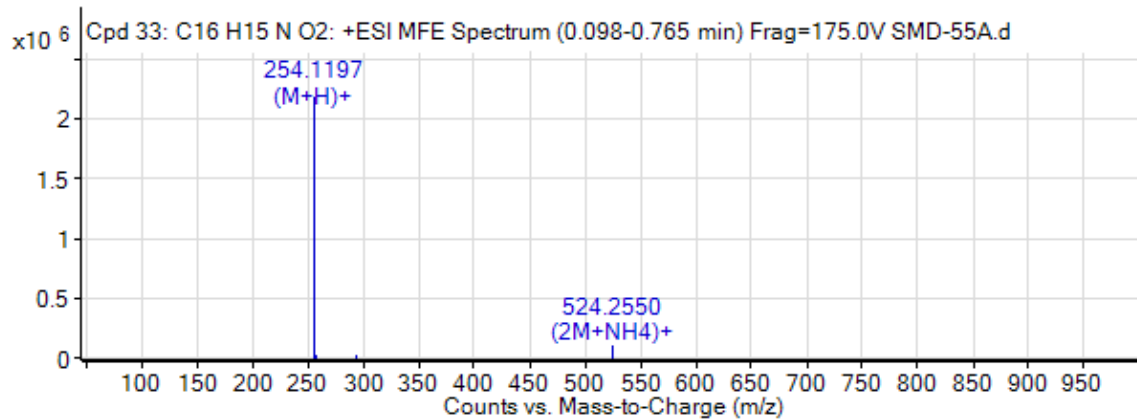

#### MFE MS Zoomed Spectrum

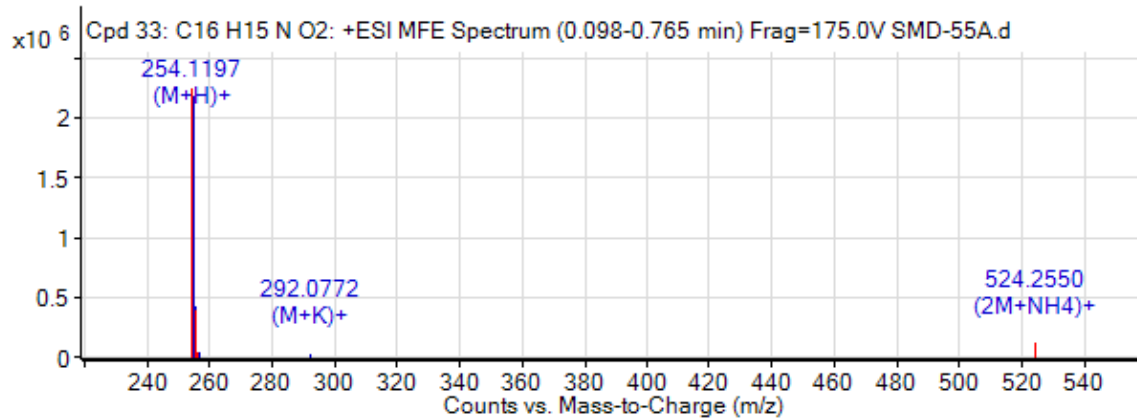



<sup>13</sup>C NMR spectrum of 1ae (100 MHz, CDCl<sub>3</sub>)

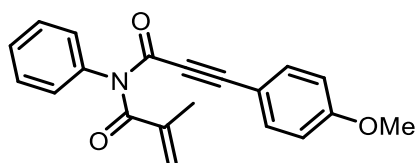

*N*-(3-(4-methoxyphenyl)propiolyl)-*N*-phenylmethacrylamide

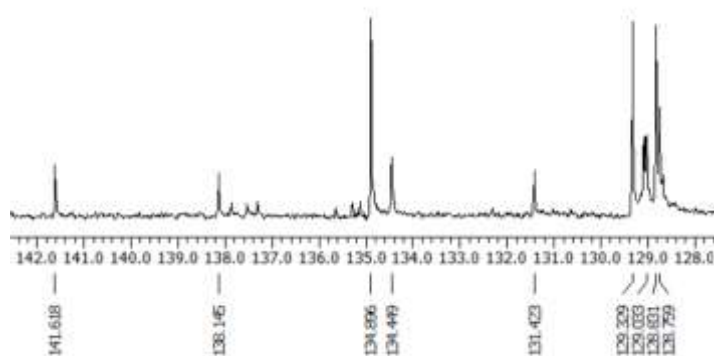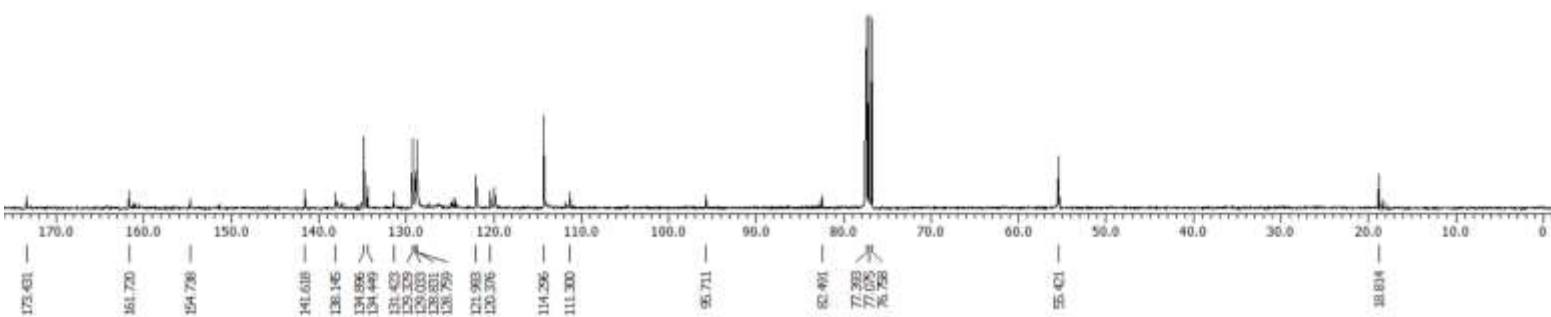

# HRMS spectrum of 1ae

## Qualitative Compound Report

**Data File** 40MEPPA.d **Sample Name** 40MEPPA  
**Sample Type** Sample **Position** P1-A3  
**Instrument Name** Instrument 1 **User Name**  
**Acq Method** MS Scan.m **Acquired Time** 01-05-2024 13:35:23  
**IRM Calibration Status** Success **DA Method** Default.m  
**Comment**

**Sample Group** Info. 3  
**Acquisition SW** 6300 series TOF/6500 series  
**Version** Q-TOF B.05.01 (85125)

### Compound Table

| Compound Label      | RT   | Mass     | Abund  | Formula      | Tgt Mass | Diff (ppm) | MPG Formula  | DB Formula   |
|---------------------|------|----------|--------|--------------|----------|------------|--------------|--------------|
| Cpd 1: C20 H17 N O3 | 0.34 | 319.1215 | 610515 | C20 H17 N O3 | 319.1208 | 2.1        | C20 H17 N O3 | C20 H17 N O3 |

| Compound Label      | m/z      | RT   | Algorithm       | Mass     |
|---------------------|----------|------|-----------------|----------|
| Cpd 1: C20 H17 N O3 | 320.1287 | 0.34 | Find By Formula | 319.1215 |

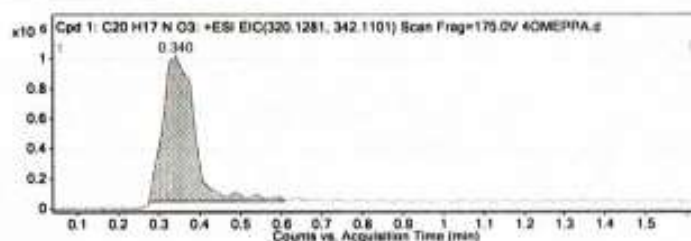

### MS Spectrum

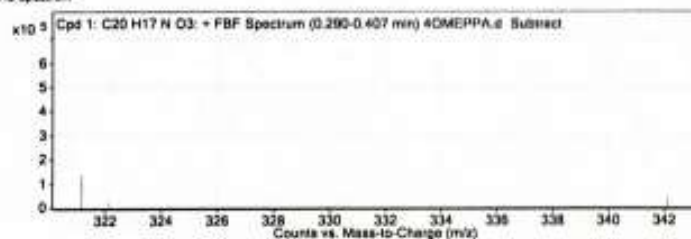

### MS Zoomed Spectrum

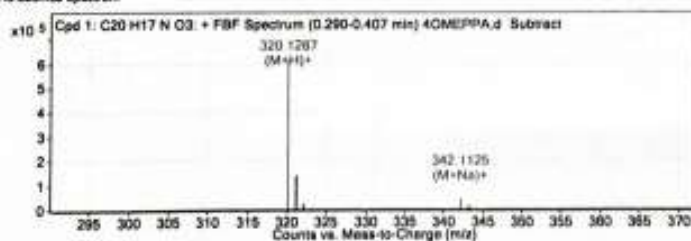

### MS Spectrum Peak List

| m/z      | z | Abund     | Formula    | Ion     |
|----------|---|-----------|------------|---------|
| 320.1287 | 1 | 610515.13 | C20H18NO3  | (M+H)+  |
| 321.1319 | 1 | 133285.97 | C20H18NO3  | (M+H)+  |
| 322.1337 | 1 | 21906.9   | C20H18NO3  | (M+H)+  |
| 323.1375 | 1 | 3654.61   | C20H18NO3  | (M+H)+  |
| 342.1125 | 1 | 41365.99  | C20H17NaO3 | (M+Na)+ |
| 343.119  | 1 | 10981.56  | C20H17NaO3 | (M+Na)+ |

--- End Of Report ---

**<sup>1</sup>H NMR spectrum of 1af (400 MHz, CDCl<sub>3</sub>)**

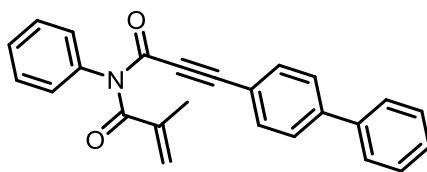

*N*-(3-([1,1'-biphenyl]-4-yl)propiolyl)-*N*-phenylmethacrylamide

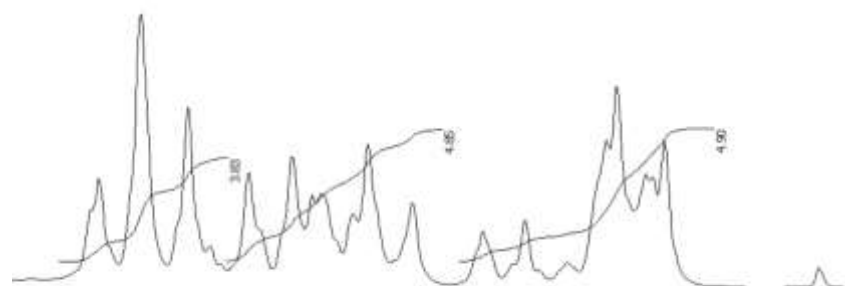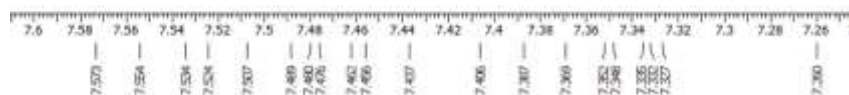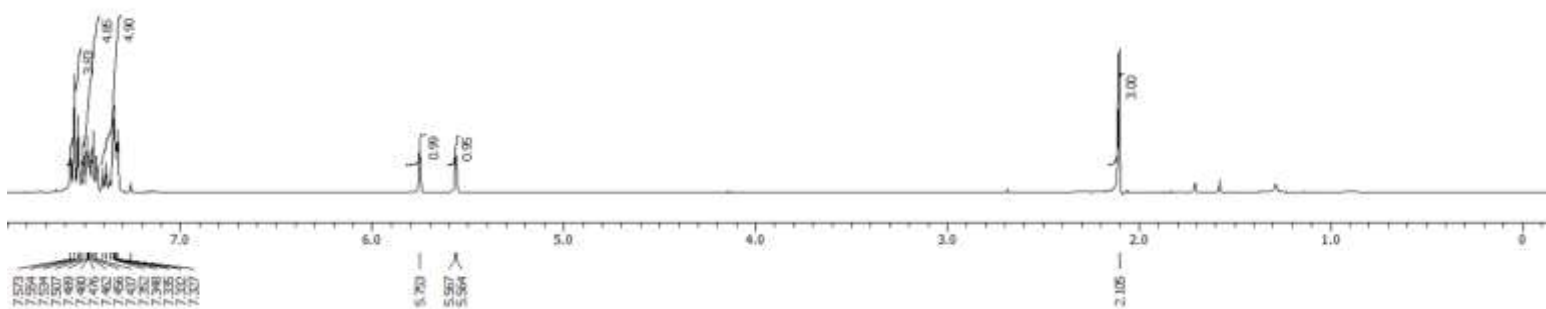



<sup>13</sup>C NMR spectrum of 1af (100 MHz, CDCl<sub>3</sub>)

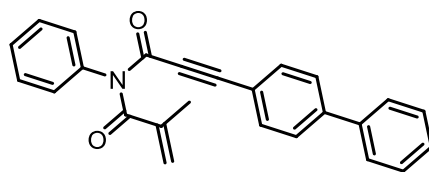

*N*-(3-([1,1'-biphenyl]-4-yl)propiolyl)-*N*-phenylmethacrylamide

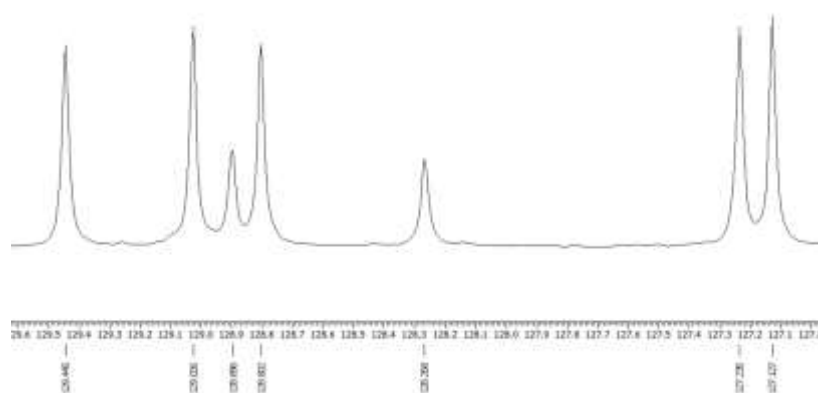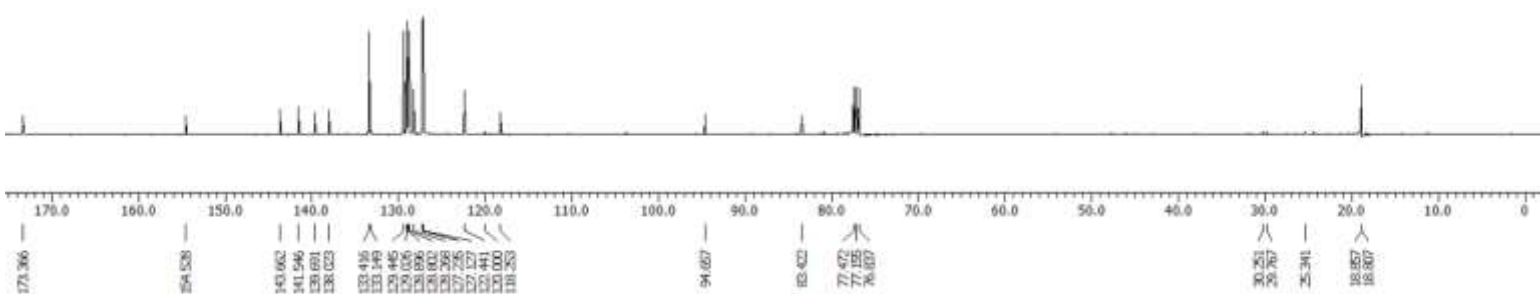

# HRMS spectrum of 1af

## Qualitative Compound Report

|                               |                             |                      |                     |
|-------------------------------|-----------------------------|----------------------|---------------------|
| <b>Data File</b>              | 314-A.d                     | <b>Sample Name</b>   | 314-A               |
| <b>Sample Type</b>            | Sample                      | <b>Position</b>      | P1-C2               |
| <b>Instrument Name</b>        | Instrument 1                | <b>User Name</b>     |                     |
| <b>Acq Method</b>             | MS Scan.m                   | <b>Acquired Time</b> | 03-05-2024 13:50:56 |
| <b>IRM Calibration Status</b> | Success                     | <b>DA Method</b>     | Default.m           |
| <b>Comment</b>                |                             |                      |                     |
| <b>Sample Group</b>           |                             | <b>Info.</b>         | 3                   |
| <b>Acquisition SW</b>         | 6200 series TOF/6500 series |                      |                     |
| <b>Version</b>                | Q-TOF 8.05.01 (B5125)       |                      |                     |

### Compound Table

| Compound Label      | RT    | Mass     | Abund   | Formula      | Tgt Mass | Diff (ppm) | MFG Formula  | DB Formula   |
|---------------------|-------|----------|---------|--------------|----------|------------|--------------|--------------|
| Cpd 1: C25 H19 N O2 | 0.359 | 365.1426 | 2003384 | C25 H19 N O2 | 365.1416 | 2.7        | C25 H19 N O2 | C25 H19 N O2 |

| Compound Label      | m/z      | RT    | Algorithm       | Mass     |
|---------------------|----------|-------|-----------------|----------|
| Cpd 1: C25 H19 N O2 | 366.1498 | 0.359 | Find By Formula | 365.1425 |

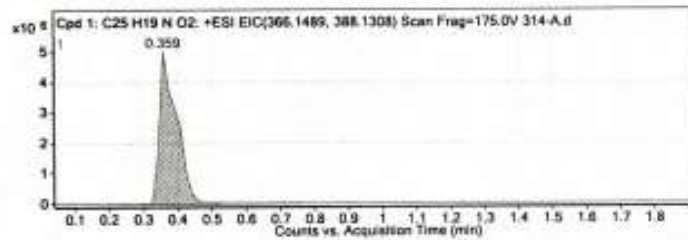

### MS Spectrum

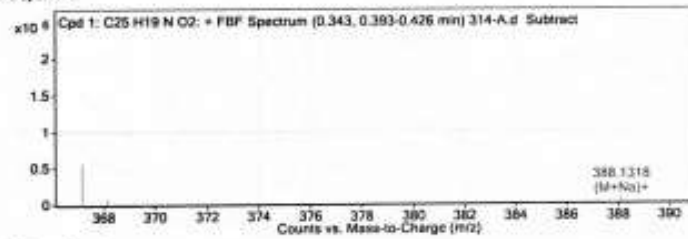

### MS Zoomed Spectrum

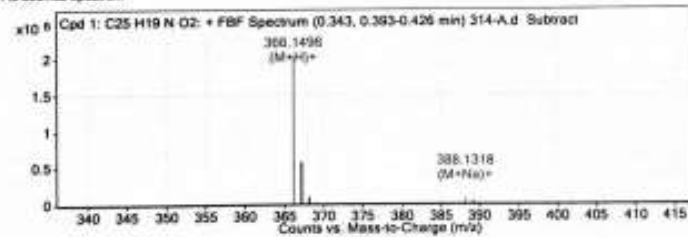

### MS Spectrum Peak List

| m/z      | z | Abund      | Formula   | Ion     |
|----------|---|------------|-----------|---------|
| 366.1498 | 1 | 2003383.75 | C25H20NO2 | (M+H)+  |
| 367.1532 | 1 | 564809.31  | C25H20NO2 | (M+H)+  |
| 368.1567 | 1 | 82827.2    | C25H20NO2 | (M+H)+  |
| 369.158  | 1 | 8330.13    | C25H20NO2 | (M+H)+  |
| 388.1318 | 1 | 69122.83   | C25H19NO2 | (M+Na)+ |
| 389.1395 | 1 | 20041.17   | C25H19NO2 | (M+Na)+ |
| 390.1474 | 1 | 3543.41    | C25H19NO2 | (M+Na)+ |
| 391.1477 | 1 | 909.3      | C25H19NO2 | (M+Na)+ |

--- End Of Report ---

**<sup>1</sup>H NMR spectrum of 3b (400 MHz, CDCl<sub>3</sub>)**

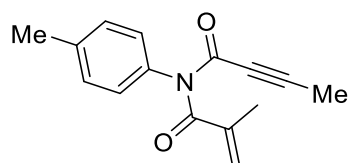

*N*-methacryloyl-*N*-(*p*-tolyl)but-2-ynamide

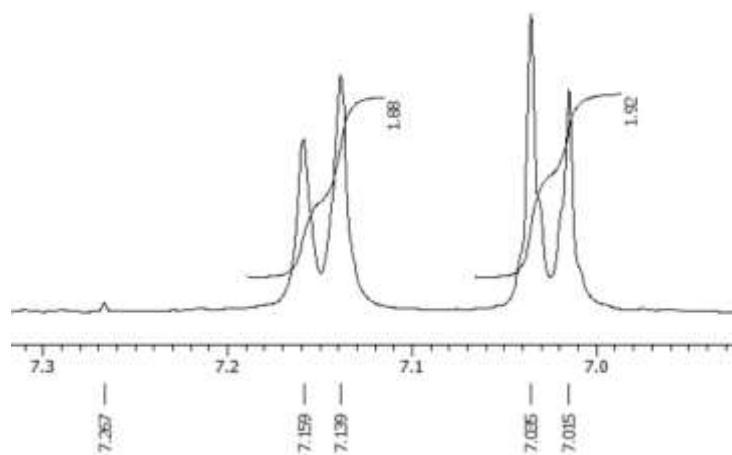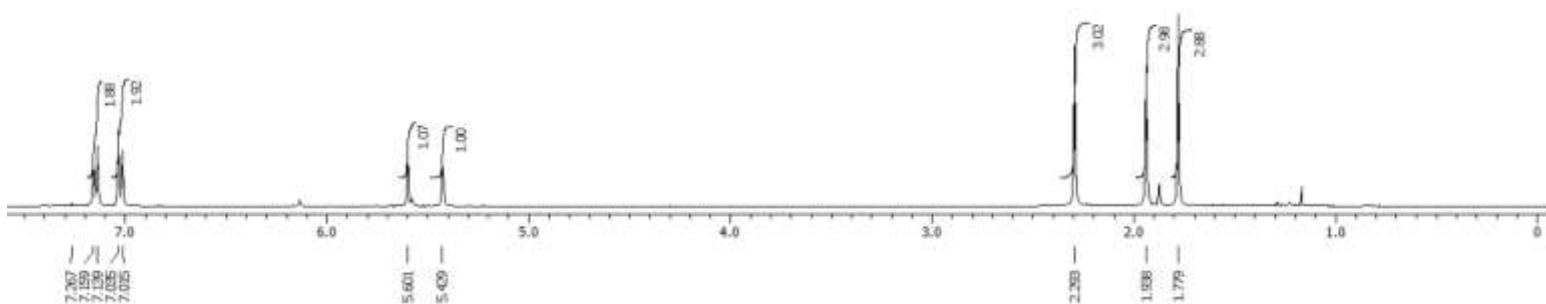

<sup>13</sup>C NMR spectrum of 3b (100 MHz, CDCl<sub>3</sub>)

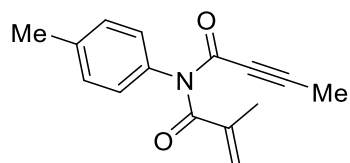

*N*-methacryloyl-*N*-(*p*-tolyl)but-2-ynamide

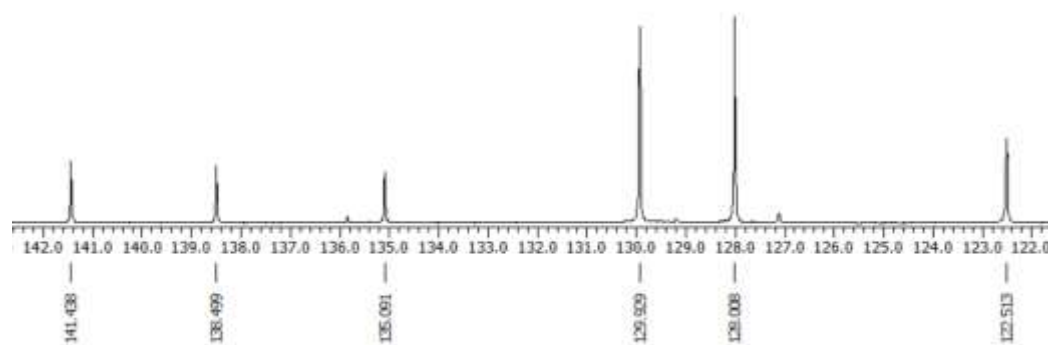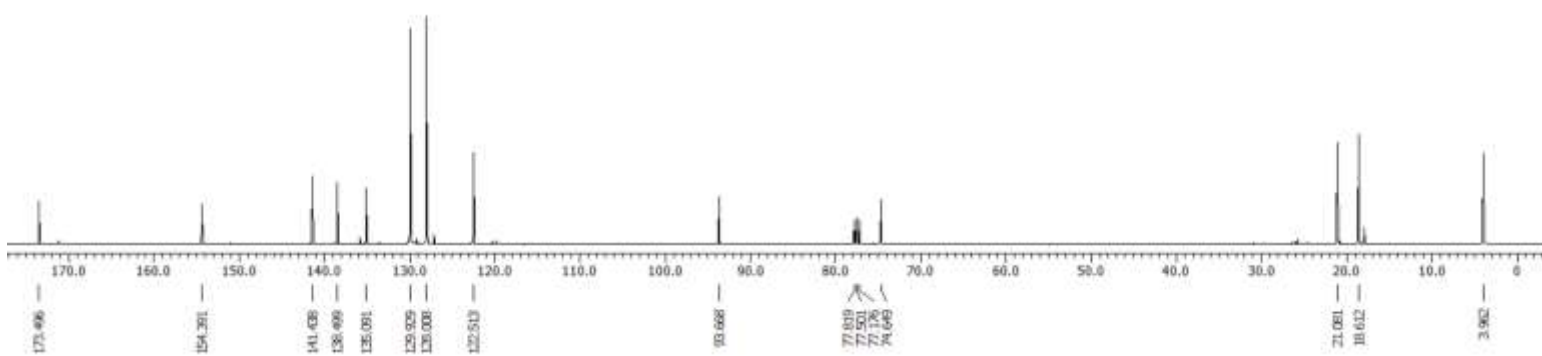

# HRMS spectrum of 3b

## Qualitative Compound Report

**Data File** 289-A.d **Sample Name** 289-A  
**Sample Type** Sample **Position** P1-B5  
**Instrument Name** Instrument 1 **User Name**  
**Acq Method** MS Scan.m **Acquired Time** 03-05-2024 13:34:10  
**IRM Calibration Status** **DA Method** Default.m  
**Comment**

**Sample Group** Info. 3  
**Acquisition SW** 6200 series TOP/6500 series  
**Version** Q-TOF 8.05.01 (85125)

### Compound Table

| Compound Label      | RT    | Mass     | Abund  | Formula      | Tgt Mass | Diff (ppm) | MPG Formula  | DB Formula   |
|---------------------|-------|----------|--------|--------------|----------|------------|--------------|--------------|
| Cpd 1: C15 H15 N O2 | 0.586 | 241.1108 | 103810 | C15 H15 N O2 | 241.1103 | 2.34       | C15 H15 N O2 | C15 H15 N O2 |

| Compound Label      | m/z      | RT    | Algorithm       | Mass     |
|---------------------|----------|-------|-----------------|----------|
| Cpd 1: C15 H15 N O2 | 264.1011 | 0.586 | Find by Formula | 241.1108 |

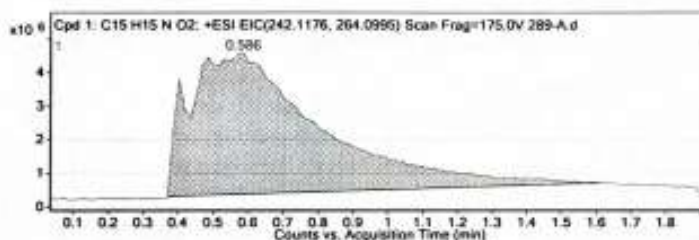

### MS Spectrum

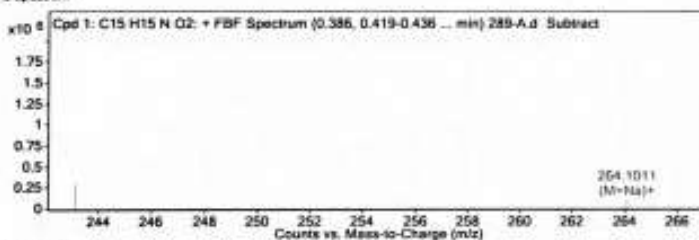

### MS Zoomed Spectrum

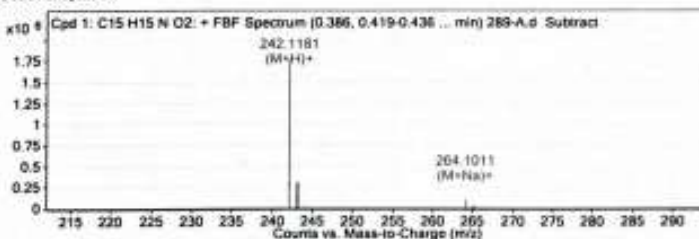

### MS Spectrum Peak List

| m/z      | z | Abund      | Formula     | Ion     |
|----------|---|------------|-------------|---------|
| 242.1181 | 1 | 1764747.75 | C15H16NO2   | (M+H)+  |
| 243.1212 | 1 | 300927.28  | C15H16NO2   | (M+H)+  |
| 264.1011 | 1 | 103809.88  | C15H15NNaO2 | (M+Na)+ |
| 265.1046 | 1 | 17338.39   | C15H15NNaO2 | (M+Na)+ |
| 266.1088 | 1 | 1806.65    | C15H15NNaO2 | (M+Na)+ |
| 267.112  | 1 | 102.84     | C15H15NNaO2 | (M+Na)+ |

--- End Of Report ---

**<sup>1</sup>H NMR spectrum of 3f (400 MHz, CDCl<sub>3</sub>)**

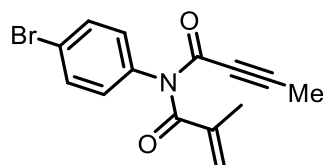

*N*-(4-bromophenyl)-*N*-methacryloylbut-2-ynamide

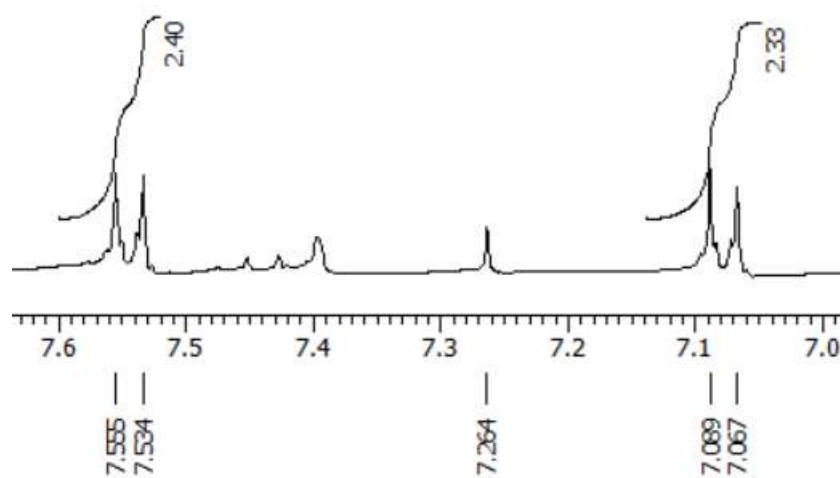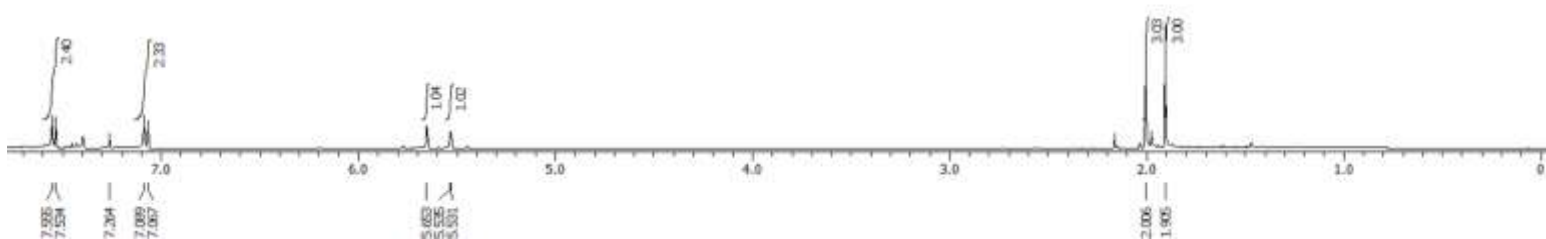

<sup>13</sup>C NMR spectrum of 3f (100 MHz, CDCl<sub>3</sub>)



*N*-(4-bromophenyl)-*N*-methacryloylbut-2-ynamide

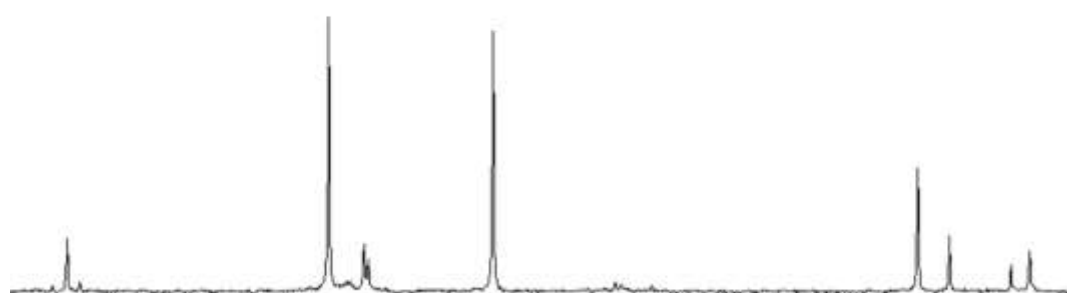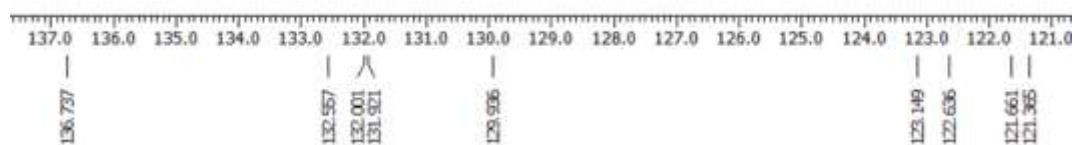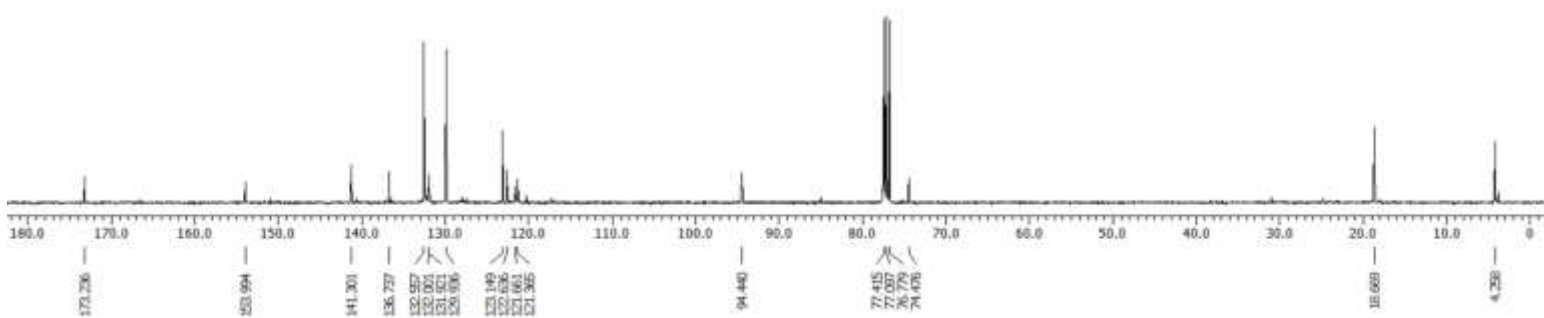

# HRMS spectrum of 3f

## Qualitative Compound Report

**Data File** ST-296-A.d **Sample Name** ST-296-A  
**Sample Type** Sample **Position** P1-A8  
**Instrument Name** Instrument 1 **User Name**  
**Acq Method** MS Scan.m **Acquired Time** 11-05-2024 12:25:37  
**IRM Calibration Status** Success **DA Method** Default.m  
**Comment**

**Sample Group** Info. 3  
**Acquisition SW** 6200 series TOF/6500 series  
**Version** Q-TOF 8.05.01 (85125)

### Compound Table

| Compound Label         | RT    | Mass     | Abund  | Formula         | Tgt Mass | Diff (ppm) | MFG Formula     | DB Formula      |
|------------------------|-------|----------|--------|-----------------|----------|------------|-----------------|-----------------|
| Cpd 1: C14 H12 Br N O2 | 0.803 | 305.0067 | 115520 | C14 H12 Br N O2 | 305.0051 | 5.16       | C14 H12 Br N O2 | C14 H12 Br N O2 |

| Compound Label         | m/z      | RT    | Algorithm       | Mass     |
|------------------------|----------|-------|-----------------|----------|
| Cpd 1: C14 H12 Br N O2 | 327.9957 | 0.803 | Find By Formula | 305.0067 |

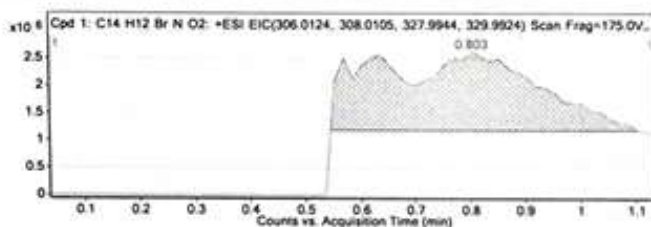

### MS Spectrum

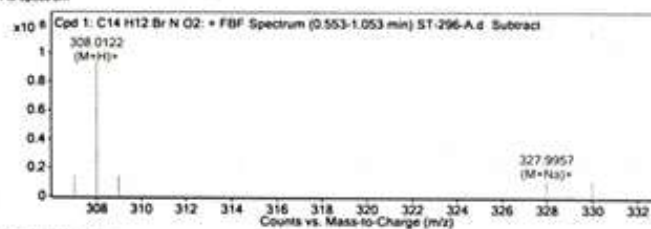

### MS Zoomed Spectrum

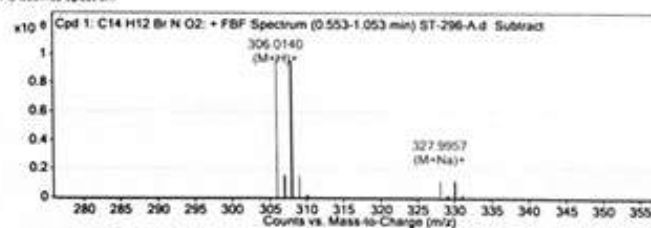

### MS Spectrum Peak List

| m/z      | z | Abund     | Formula       | Ion     |
|----------|---|-----------|---------------|---------|
| 306.014  | 1 | 964470.94 | C14H13BrNO2   | (M+H)+  |
| 307.0169 | 1 | 143638.41 | C14H13BrNO2   | (M+H)+  |
| 308.0122 | 1 | 957175.19 | C14H13BrNO2   | (M+H)+  |
| 309.0151 | 1 | 145578.98 | C14H13BrNO2   | (M+H)+  |
| 310.0197 | 1 | 16641.71  | C14H13BrNO2   | (M+H)+  |
| 327.9957 | 1 | 115520.27 | C14H12BrNNaO2 | (M+Na)+ |
| 328.9989 | 1 | 17230.08  | C14H12BrNNaO2 | (M+Na)+ |
| 329.9939 | 1 | 113081.05 | C14H12BrNNaO2 | (M+Na)+ |
| 330.997  | 1 | 16866.98  | C14H12BrNNaO2 | (M+Na)+ |
| 332.0003 | 1 | 2003.74   | C14H12BrNNaO2 | (M+Na)+ |



<sup>1</sup>H NMR spectrum of 3j (400 MHz, CDCl<sub>3</sub>)

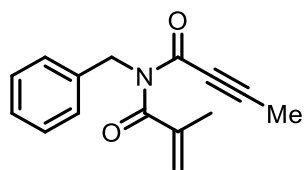

*N*-benzyl-*N*-methacryloylbut-2-ynamide

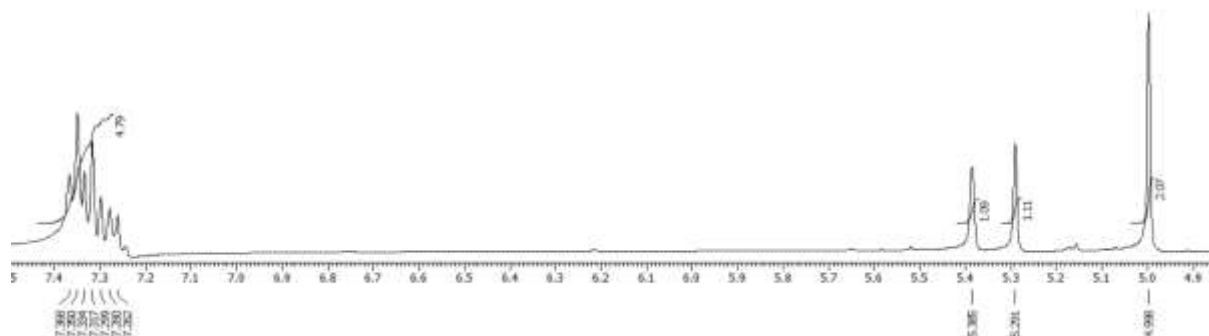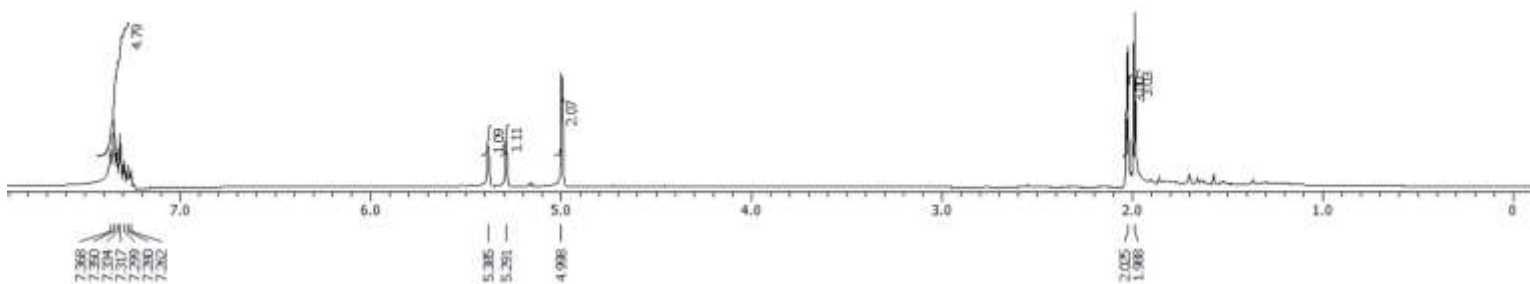

<sup>13</sup>C NMR spectrum of 3j (100 MHz, CDCl<sub>3</sub>)



*N*-benzyl-*N*-methacryloylbut-2-ynamide

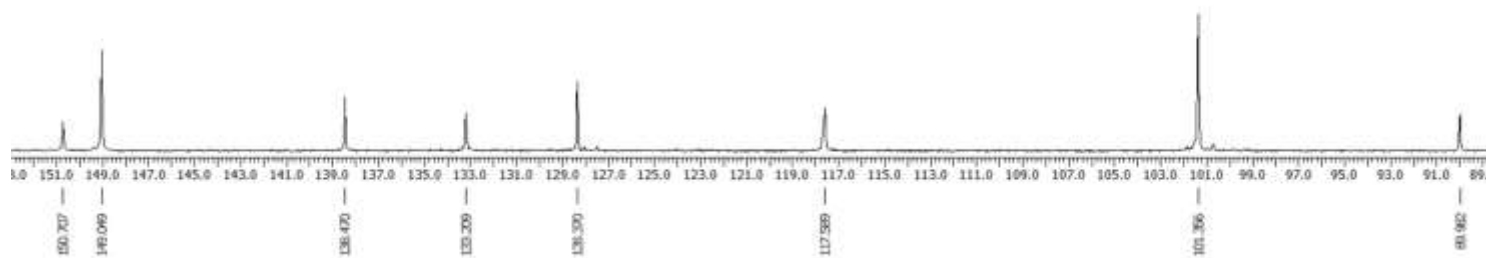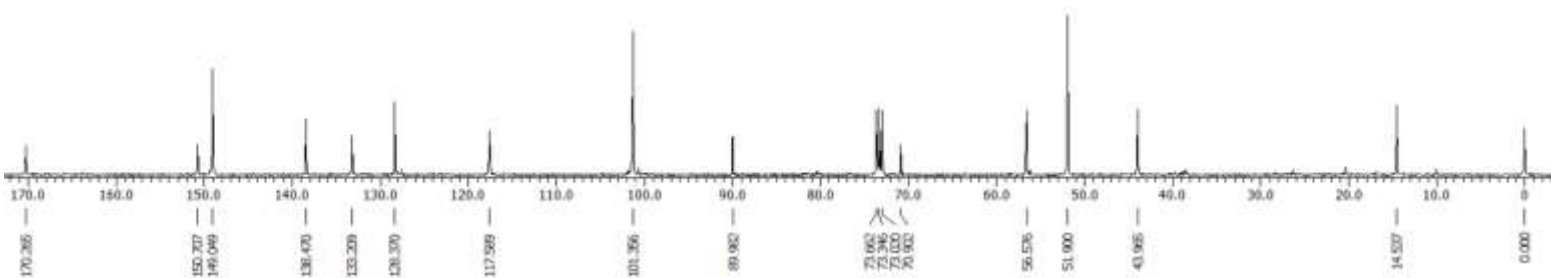

# HRMS spectrum of 3j

## Qualitative Compound Report

**Data File:** 340-A.d **Sample Name:** 340-A  
**Sample Type:** Sample **Position:** P1-B4  
**Instrument Name:** Instrument 1 **User Name:**  
**Acq Method:** MS Scan.m **Acquired Time:** 03-05-2024 13:29:28  
**IRM Calibration Status:** **DA Method:** Default.m  
**Comment:**

**Sample Group:** Info. 1  
**Acquisition SW:** 6200 series TOF/6500 series  
**Version:** Q-TOF 8.05.01 (85125)

### Compound Table

| Compound Label      | RT    | Mass     | Abund   | Formula      | Tgt Mass | DIFF (ppm) | MFG Formula  | DB Formula   |
|---------------------|-------|----------|---------|--------------|----------|------------|--------------|--------------|
| Cpd 1: C15 H15 N O2 | 0.621 | 241.1106 | 1800411 | C15 H15 N O2 | 241.1103 | 1.4        | C15 H15 N O2 | C15 H15 N O2 |

| Compound Label      | m/z      | RT    | Algorithm       | Mass     |
|---------------------|----------|-------|-----------------|----------|
| Cpd 1: C15 H15 N O2 | 242.1179 | 0.621 | Find By Formula | 241.1106 |

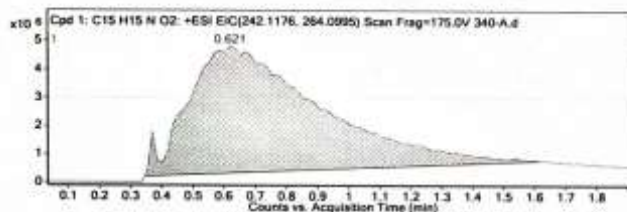

### MS Spectrum

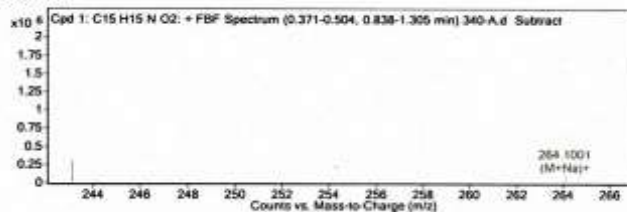

### MS Zoomed Spectrum

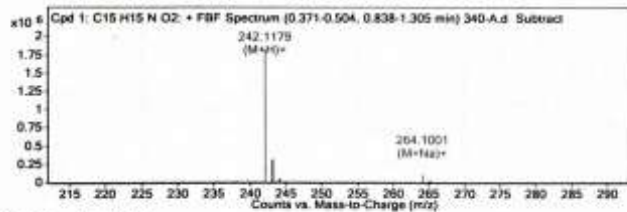

### MS Spectrum Peak List

| m/z      | z | Abund     | Formula     | Ion     |
|----------|---|-----------|-------------|---------|
| 242.1179 | 1 | 1800411   | C15H16NO2   | [H+]+   |
| 243.121  | 1 | 30773.16  | C15H16NO2   | [H+]+   |
| 244.1252 | 1 | 31442.27  | C15H16NO2   | [H+]+   |
| 245.1288 | 1 | 3096.14   | C15H16NO2   | [H+]+   |
| 264.1001 | 1 | 110312.05 | C15H15NNaO2 | [H+Na]+ |
| 265.1033 | 1 | 18253.43  | C15H15NNaO2 | [H+Na]+ |
| 266.1055 | 1 | 2119.56   | C15H15NNaO2 | [H+Na]+ |
| 267.1028 | 1 | 123.23    | C15H15NNaO2 | [H+Na]+ |

--- End Of Report ---

**<sup>1</sup>H NMR spectrum of 2a (400 MHz, CDCl<sub>3</sub>)**

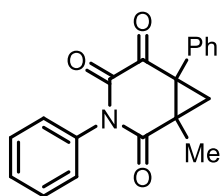

1-methyl-3,6-diphenyl-3-azabicyclo[4.1.0]heptane-2,4,5-trione

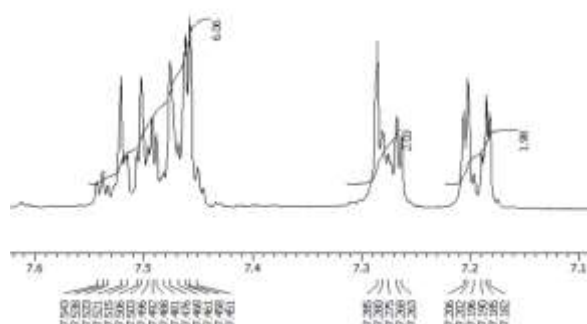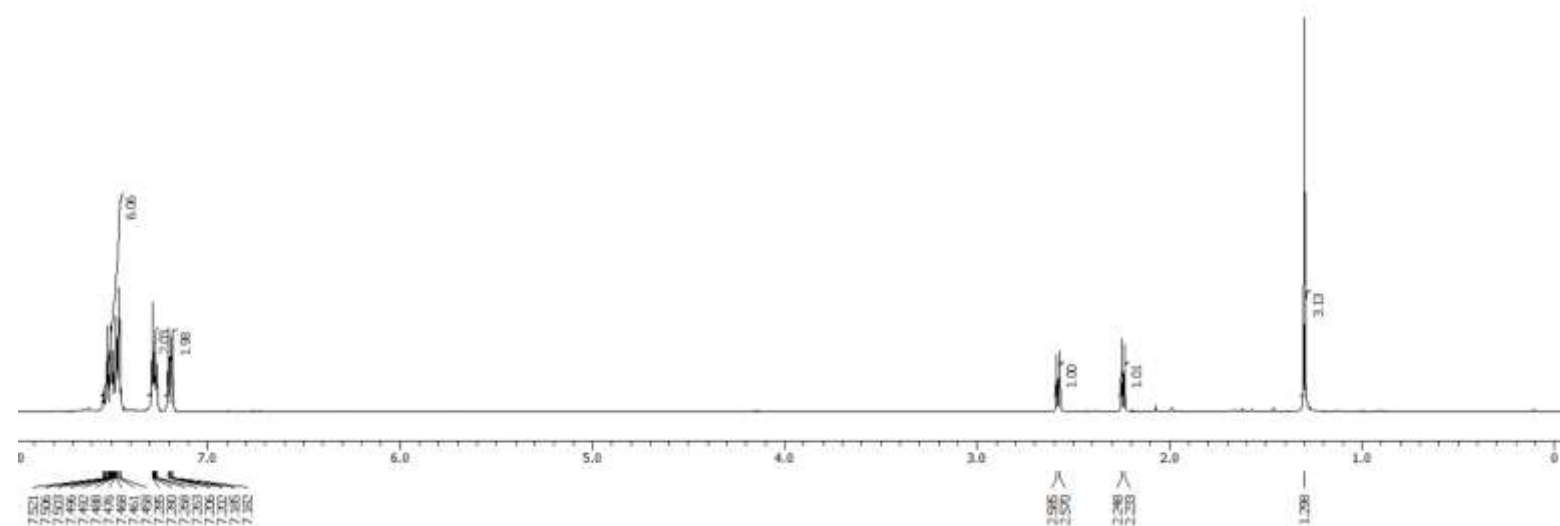

<sup>13</sup>C NMR spectrum of 2a (100 MHz, CDCl<sub>3</sub>)

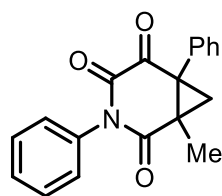

1-methyl-3,6-diphenyl-3-azabicyclo[4.1.0]heptane-2,4,5-trione

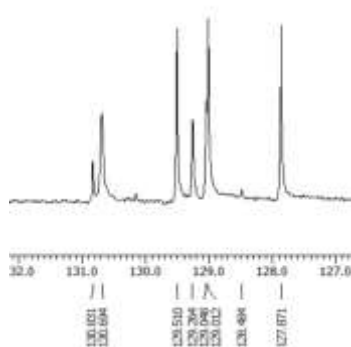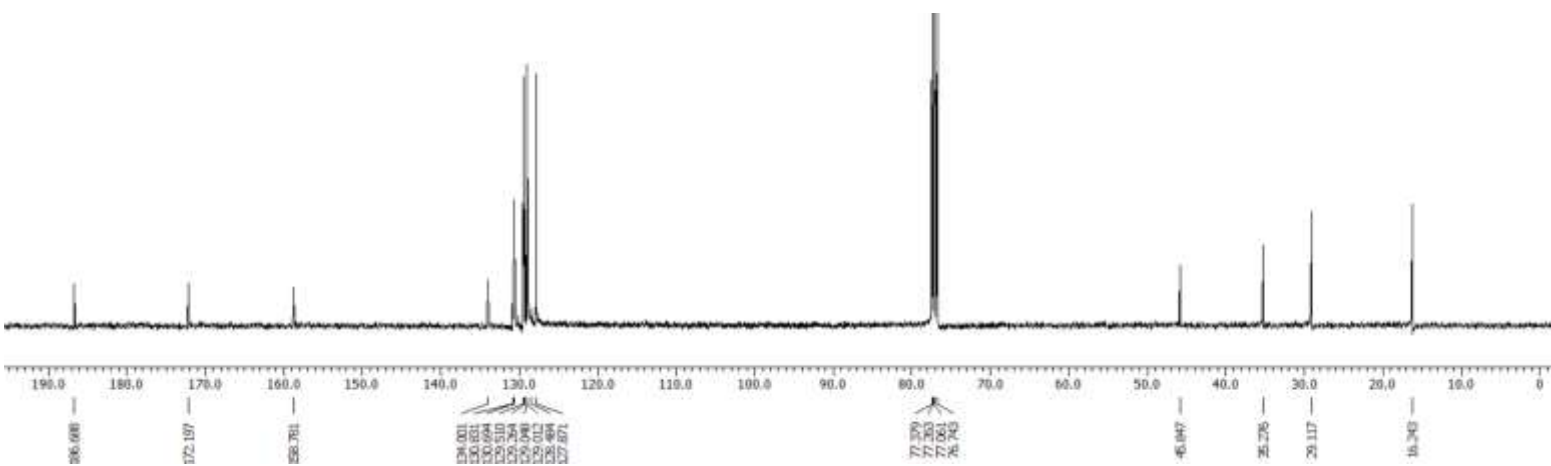

# HRMS spectrum of 2a

## Qualitative Compound Report

|                        |              |               |                     |
|------------------------|--------------|---------------|---------------------|
| Data File              | SMT-238.d    | Sample Name   | SMT-238             |
| Sample Type            | Sample       | Position      | P1-A6               |
| Instrument Name        | Instrument 1 | User Name     |                     |
| Acq Method             | MS Scan.m    | Acquired Time | 03-04-2023 13:13:49 |
| IRM Calibration Status |              | DA Method     | Default.m           |
| Comment                |              |               |                     |

Sample Group: Info. 1  
 Acquisition SW: 6200 series TOF/6500 series  
 Version: Q-TOF 8.05.01 (85125)

| Compound Label      | RT   | Mass    | Abund | Formula      | Tgt Mass | Diff (ppm) | MFG Formula  | DB Formula   |
|---------------------|------|---------|-------|--------------|----------|------------|--------------|--------------|
| Cpd 1: C19 H15 N O3 | 0.13 | 305.106 | 1167  | C19 H15 N O3 | 305.1057 | 2.58       | C19 H15 N O3 | C19 H15 N O3 |

| Compound Label      | m/z      | RT   | Algorithm       | Mass    |
|---------------------|----------|------|-----------------|---------|
| Cpd 1: C19 H15 N O3 | 306.1136 | 0.13 | Find By Formula | 305.106 |

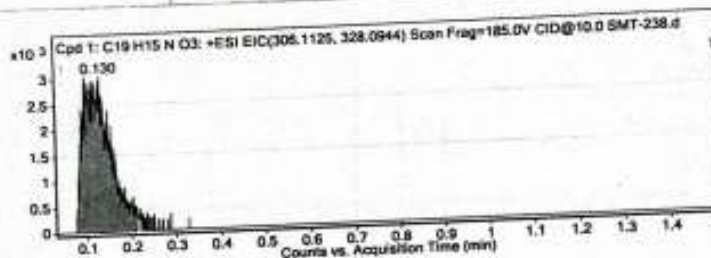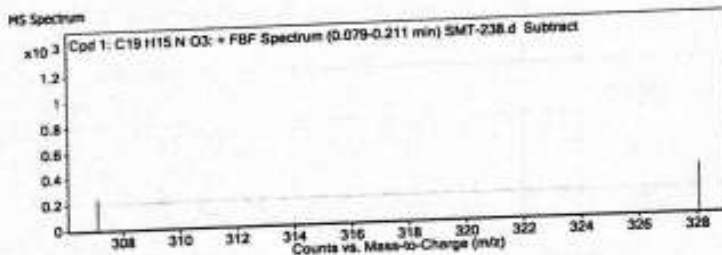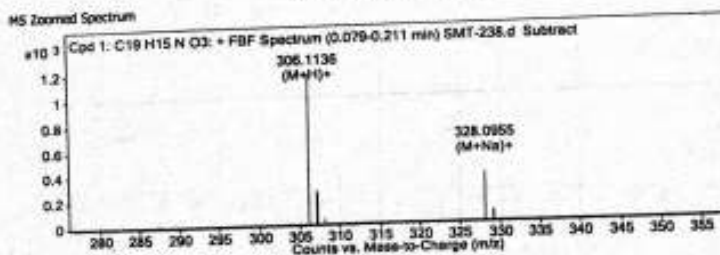

| m/z      | z | Abund   | Formula     | Ion                 |
|----------|---|---------|-------------|---------------------|
| 306.1136 | 1 | 1166.51 | C19H16NO3   | (M+H) <sup>+</sup>  |
| 307.1142 | 1 | 242.76  | C19H16NO3   | (M+H) <sup>+</sup>  |
| 328.0955 | 1 | 383.11  | C19H15NNaO3 | (M+Na) <sup>+</sup> |
| 329.0993 | 1 | 44.9    | C19H15NNaO3 | (M+Na) <sup>+</sup> |

--- End Of Report ---

**<sup>1</sup>H NMR spectrum of 2b (400 MHz, CDCl<sub>3</sub>)**

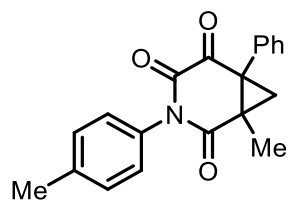

1-methyl-6-phenyl-3-(*p*-tolyl)-3-azabicyclo[4.1.0]heptane-2,4,5-trione

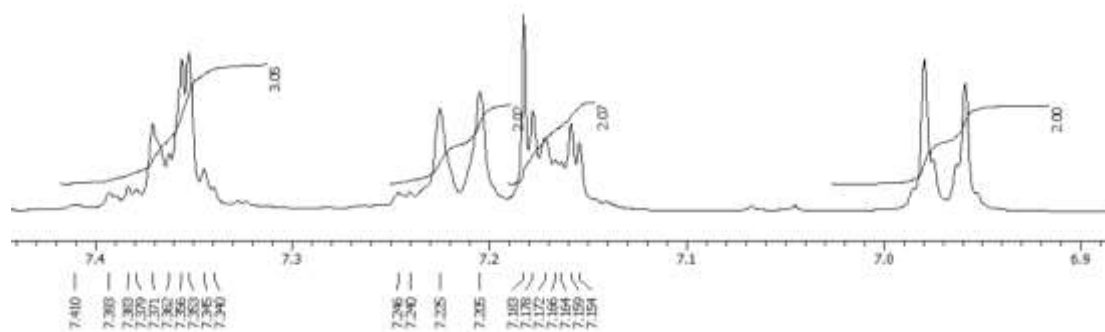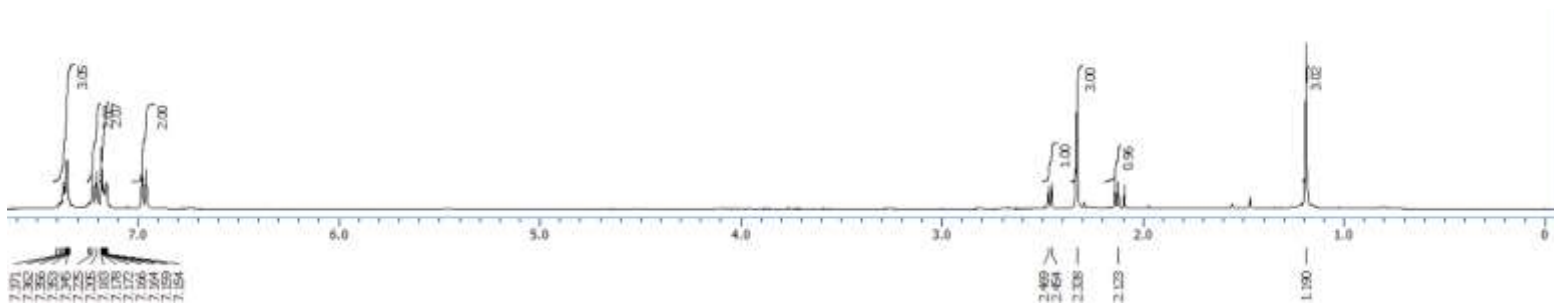

<sup>13</sup>C NMR spectrum of 2b (100 MHz, CDCl<sub>3</sub>)

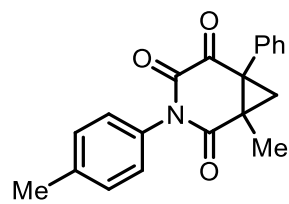

1-methyl-6-phenyl-3-(*p*-tolyl)-3-azabicyclo[4.1.0]heptane-2,4,5-trione

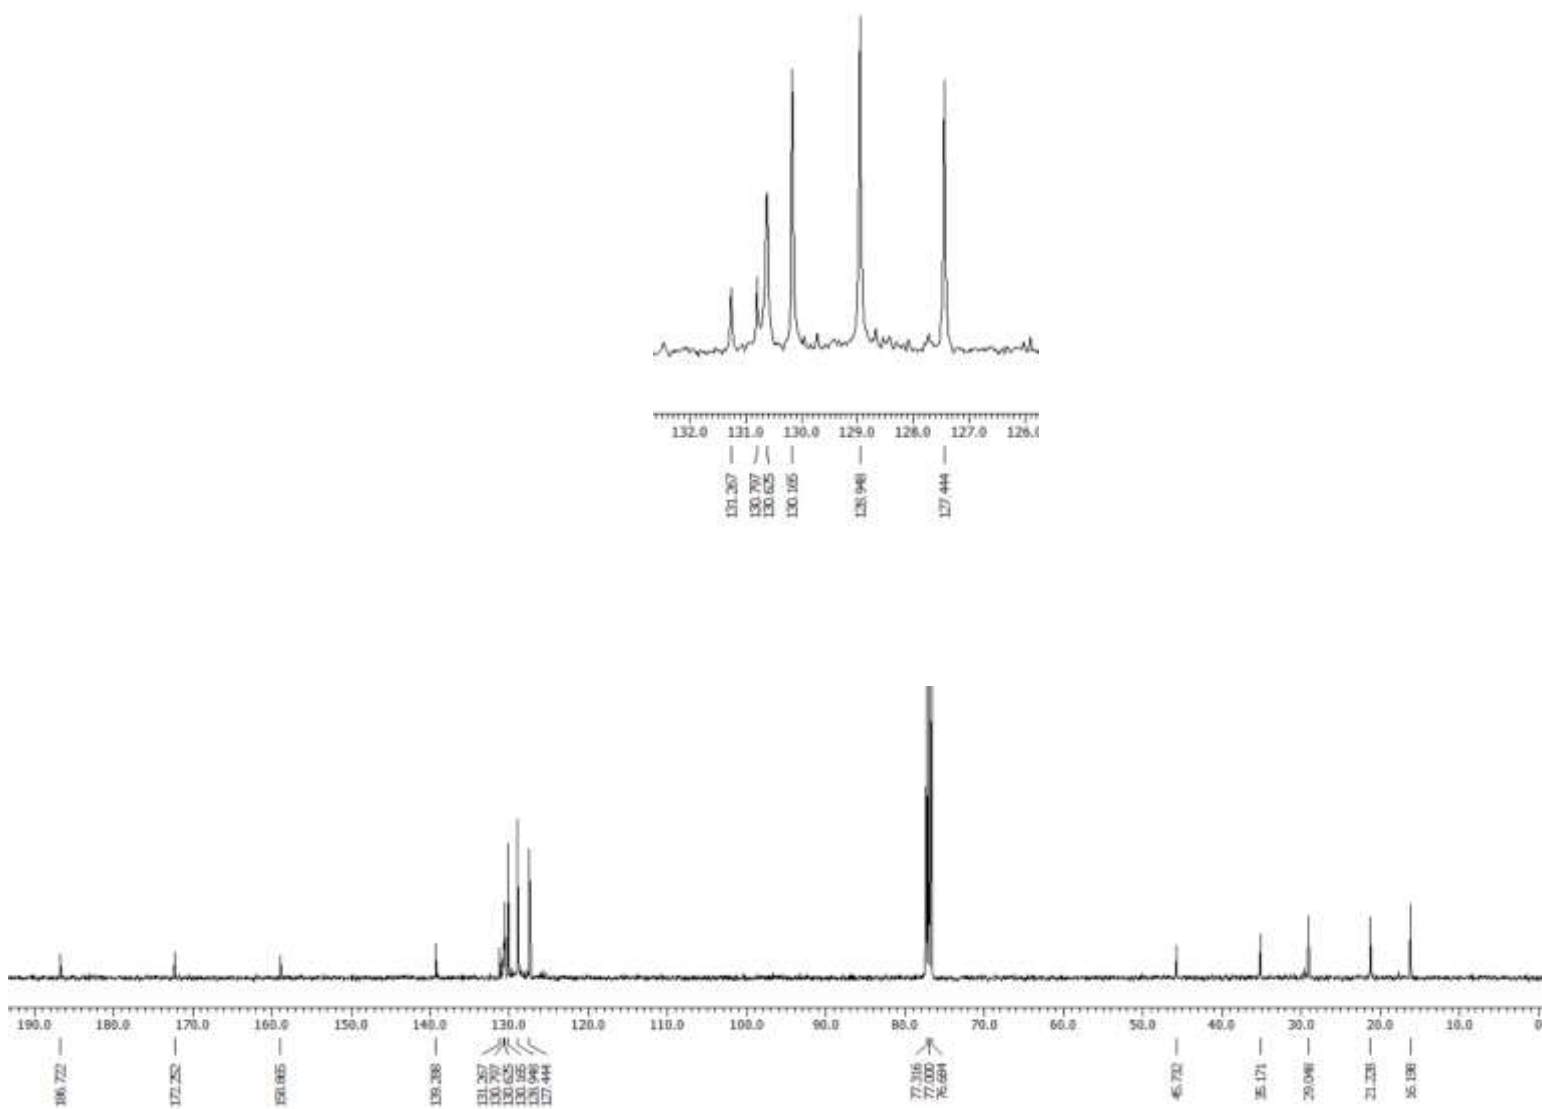



# HRMS spectrum of 2b (400 MHz, CDCl<sub>3</sub>)

## Qualitative Compound Report

|                        |              |               |                     |
|------------------------|--------------|---------------|---------------------|
| Data File              | SMT-218.d    | Sample Name   | SMT-218             |
| Sample Type            | Sample       | Position      | P1-A5               |
| Instrument Name        | Instrument 1 | User Name     |                     |
| Acq Method             | MS Scan.m    | Acquired Time | 20-05-2023 12:13:24 |
| IRM Calibration Status |              | DA Method     | Default             |
| Comment                |              |               |                     |

|                |                             |       |   |
|----------------|-----------------------------|-------|---|
| Sample Group   |                             | Info. | 3 |
| Acquisition SW | 6200 series TOF/6500 series |       |   |
| Version        | Q-TOF 8.05.01 (85125)       |       |   |

| Compound Label      | RT   | Mass     | Abund | Formula      | Tgt Mass | Diff (ppm) | MFG Formula  | DB Formula   |
|---------------------|------|----------|-------|--------------|----------|------------|--------------|--------------|
| Cpd 1: C20 H17 N O3 | 0.13 | 319.1192 | 57949 | C20 H17 N O3 | 319.1208 | -5.07      | C20 H17 N O3 | C20 H17 N O3 |

| Compound Label      | m/z      | RT   | Algorithm       | Mass     |
|---------------------|----------|------|-----------------|----------|
| Cpd 1: C20 H17 N O3 | 320.1266 | 0.13 | Find By Formula | 319.1192 |

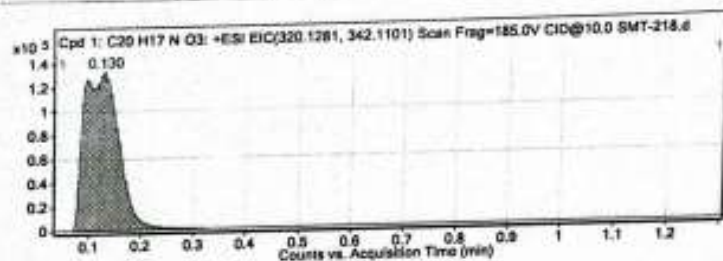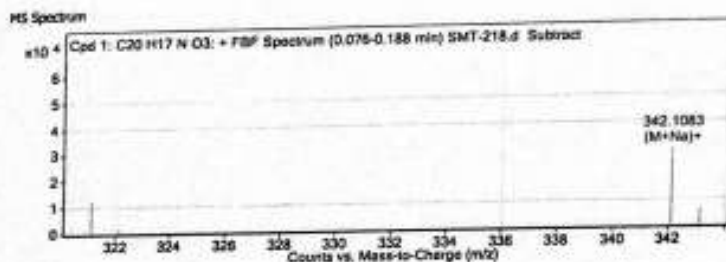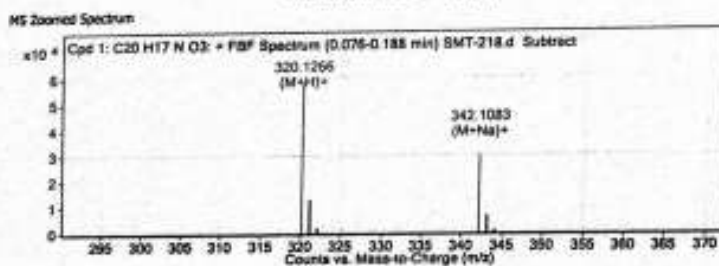

| m/z      | Abund    | Formula     | Ion     |
|----------|----------|-------------|---------|
| 320.1266 | 57949    | C20H18NO3   | (M+H)+  |
| 321.1296 | 12632.01 | C20H18NO3   | (M+H)+  |
| 322.1326 | 1609.46  | C20H18NO3   | (M+H)+  |
| 323.1378 | 142.22   | C20H18NO3   | (M+H)+  |
| 342.1083 | 28859.86 | C20H17NNaO3 | (M+Na)+ |
| 343.1124 | 6115.92  | C20H17NNaO3 | (M+Na)+ |
| 344.1142 | 779.86   | C20H17NNaO3 | (M+Na)+ |

--- End Of Report ---

<sup>1</sup>H NMR spectrum of 2c (400 MHz, CDCl<sub>3</sub>)

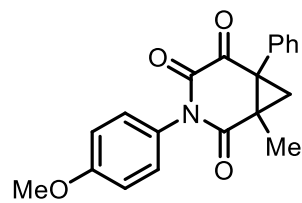

3-(4-methoxyphenyl)-1-methyl-6-phenyl-3-azabicyclo[4.1.0]heptane-2,4,5-trione

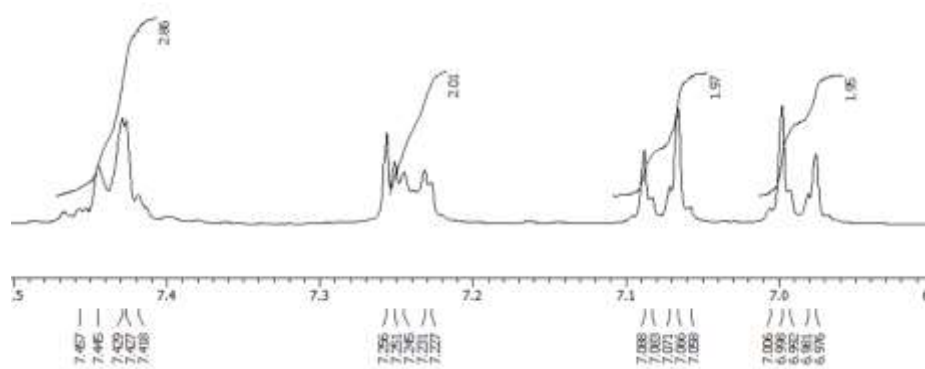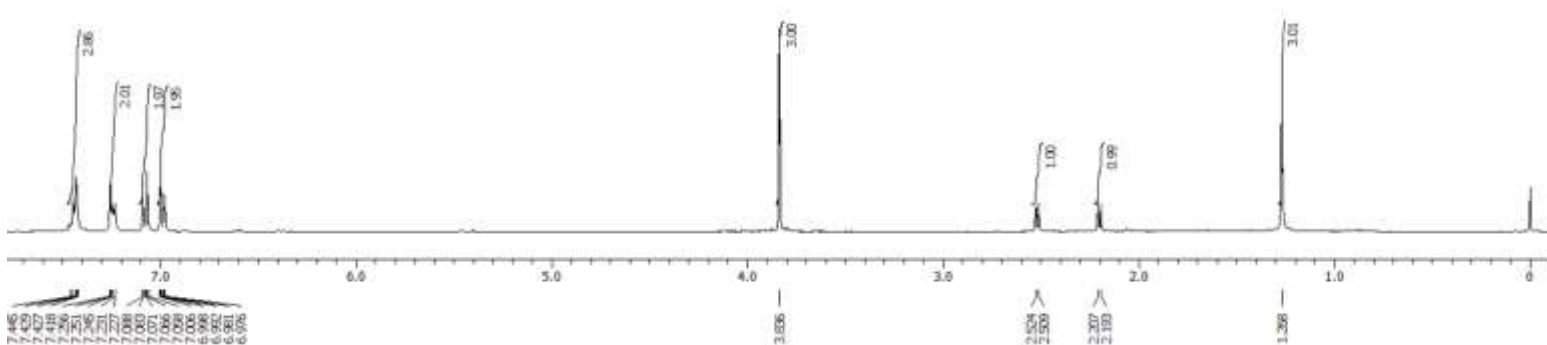

<sup>13</sup>C NMR spectrum of 2c (100 MHz, CDCl<sub>3</sub>)

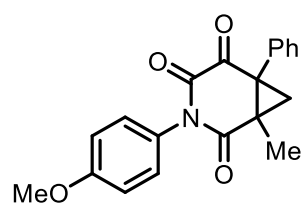

3-(4-methoxyphenyl)-1-methyl-6-phenyl-3-azabicyclo[4.1.0]heptane-2,4,5-trione

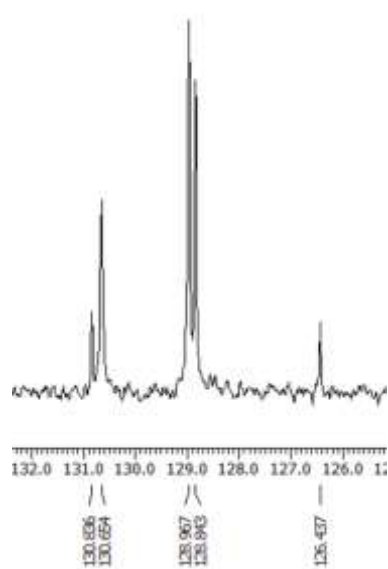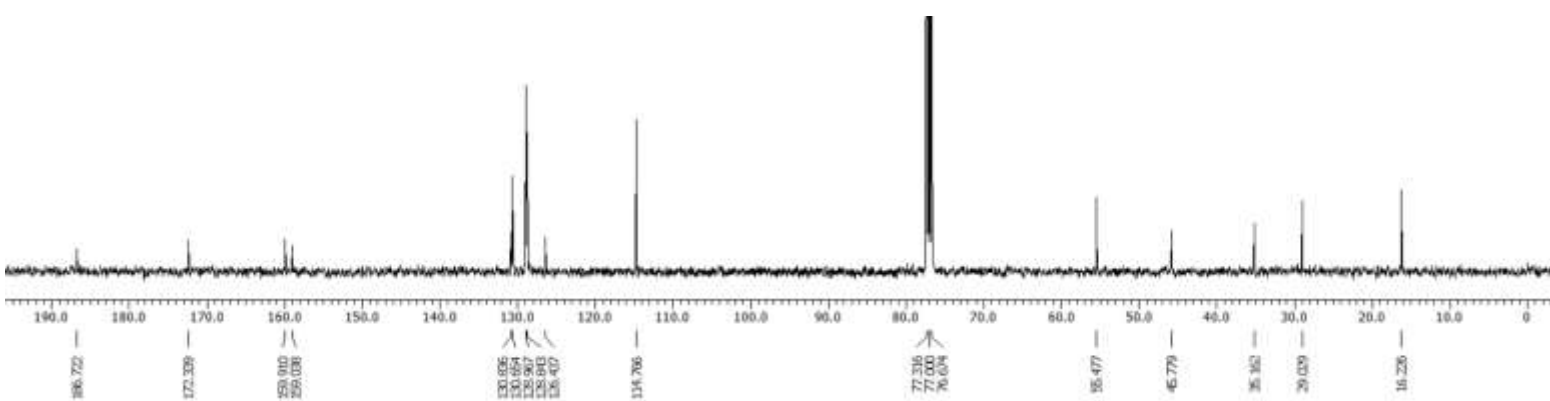

# HRMS spectrum of 2c

## Qualitative Compound Report

|                        |              |               |                     |
|------------------------|--------------|---------------|---------------------|
| Data File              | SMT-235.d    | Sample Name   | SMT-235             |
| Sample Type            | Sample       | Position      | P1-A5               |
| Instrument Name        | Instrument 1 | User Name     |                     |
| Acq Method             | MS Scan.m    | Acquired Time | 20-05-2023 12:11:05 |
| IRM Calibration Status |              | DA Method     | Default.m           |
| Comment                |              |               |                     |

Sample Group: Info. 3  
 Acquisition SW: 6200 series TOF/6500 series  
 Version: Q-TOF B.05.01 (B5125)

| Compound Label      | RT    | Mass     | Abund | Formula      | Tot Mass | Diff (ppm) | MFG Formula  | DB Formula   |
|---------------------|-------|----------|-------|--------------|----------|------------|--------------|--------------|
| Cpd 1: C20 H17 N O4 | 0.122 | 335.1137 | 11476 | C20 H17 N O4 | 335.1158 | -6.05      | C20 H17 N O4 | C20 H17 N O4 |

| Compound Label      | m/z      | RT    | Algorithm       | Mass     |
|---------------------|----------|-------|-----------------|----------|
| Cpd 1: C20 H17 N O4 | 358.1028 | 0.122 | Find by Formula | 335.1137 |

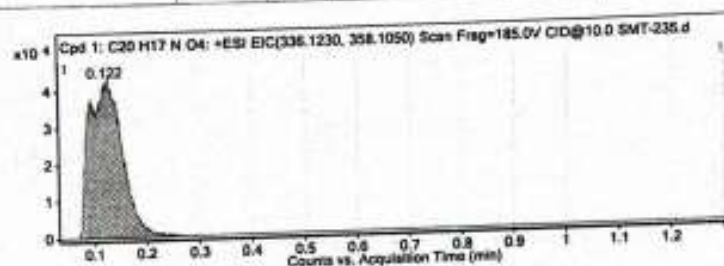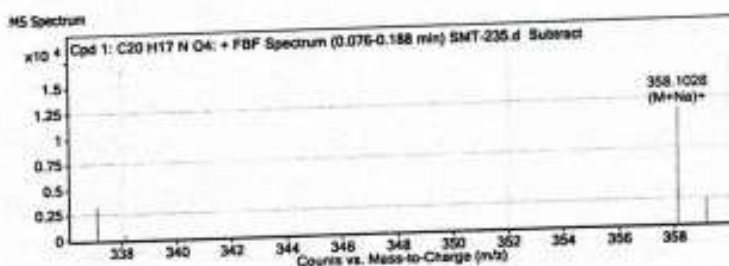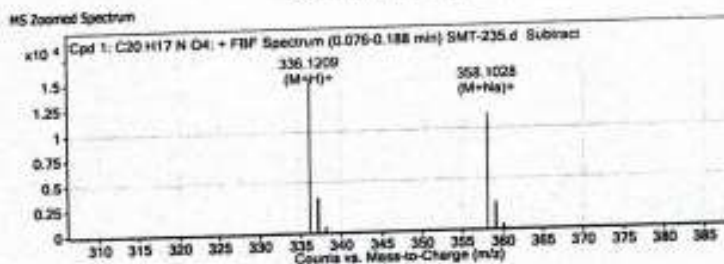

| m/z      | x | Abund    | Formula   | Ion     |
|----------|---|----------|-----------|---------|
| 336.1209 | 1 | 15186.41 | C20H18NO4 | (M+H)+  |
| 337.124  | 1 | 3262.97  | C20H18NO4 | (M+H)+  |
| 338.1303 | 1 | 481.44   | C20H18NO4 | (H+H)+  |
| 358.1028 | 1 | 11476.42 | C20H17NO4 | (M+Na)+ |
| 359.1068 | 1 | 2435.72  | C20H17NO4 | (M+Na)+ |
| 360.1133 | 1 | 324.45   | C20H17NO4 | (H+Na)+ |

--- End Of Report ---

<sup>1</sup>H NMR spectrum of 2d (400 MHz, CDCl<sub>3</sub>)

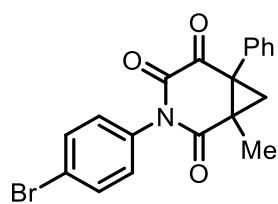

3-(4-bromophenyl)-1-methyl-6-phenyl-3-azabicyclo[4.1.0]heptane-2,4,5-trione

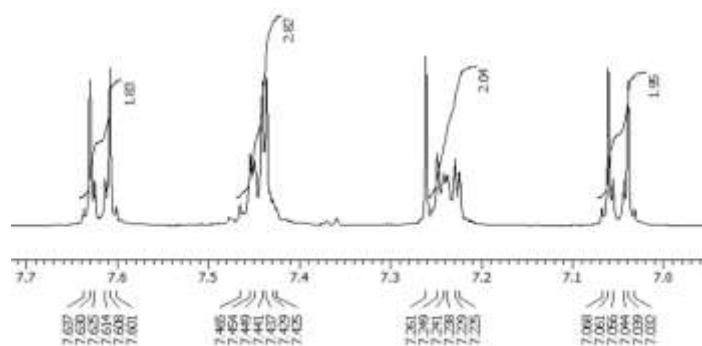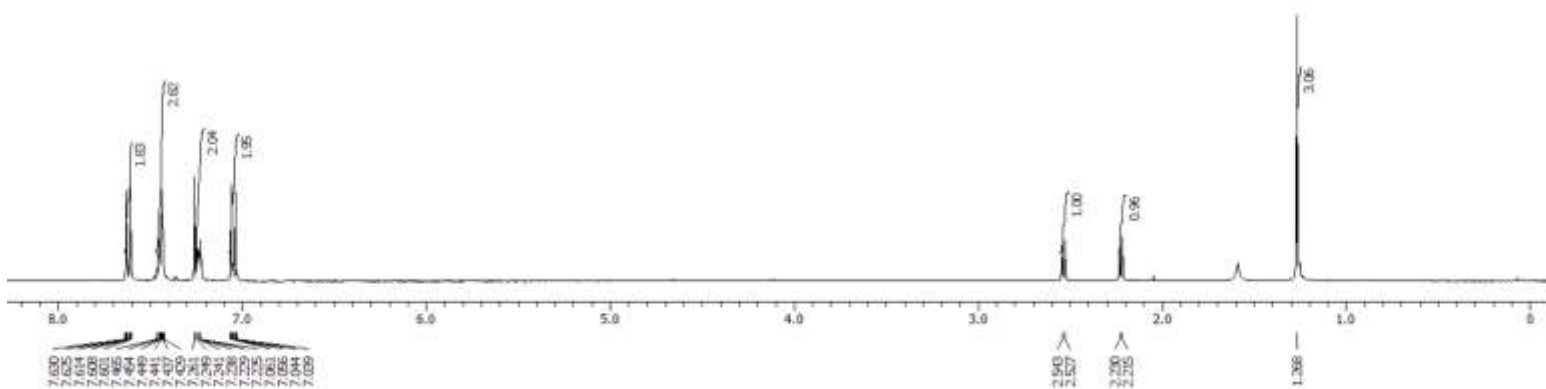

<sup>13</sup>C NMR spectrum of 2d (100 MHz, CDCl<sub>3</sub>)

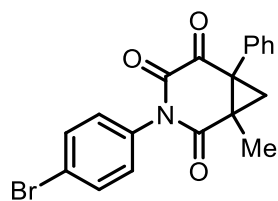

3-(4-bromophenyl)-1-methyl-6-phenyl-3-azabicyclo[4.1.0]heptane-2,4,5-trione

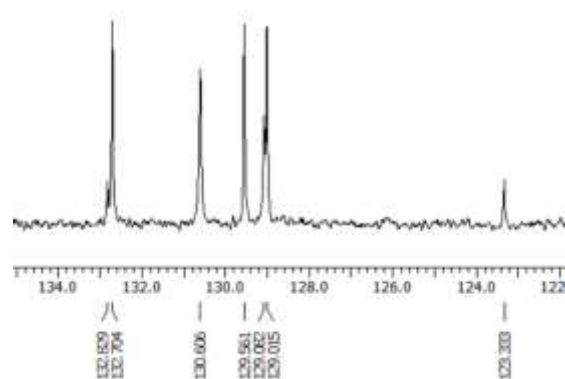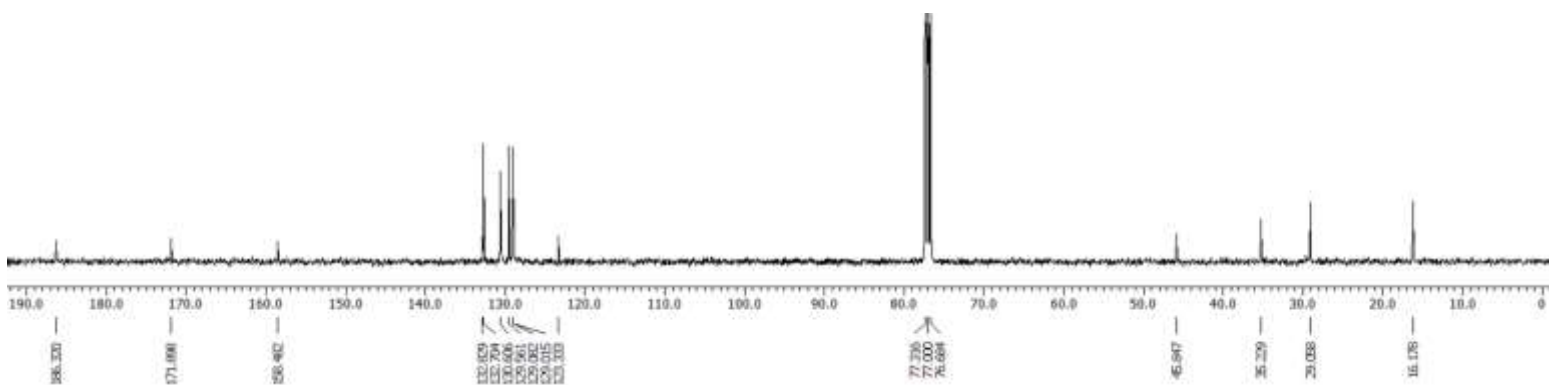

# HRMS spectrum of 2d

## Qualitative Compound Report

|                               |              |                      |                     |
|-------------------------------|--------------|----------------------|---------------------|
| <b>Data File</b>              | SMT-234.d    | <b>Sample Name</b>   | SMT-234             |
| <b>Sample Type</b>            | Sample       | <b>Position</b>      | P1-A4               |
| <b>Instrument Name</b>        | Instrument 1 | <b>User Name</b>     |                     |
| <b>Acq Method</b>             | MS Scan.m    | <b>Acquired Time</b> | 20-05-2023 12:08:46 |
| <b>IRM Calibration Status</b> |              | <b>DA Method</b>     | Default.m           |
| <b>Comment</b>                |              |                      |                     |

|                       |                             |              |   |
|-----------------------|-----------------------------|--------------|---|
| <b>Sample Group</b>   |                             | <b>Info.</b> | 3 |
| <b>Acquisition SW</b> | 6200 series TOF/MS00 series |              |   |
| <b>Version</b>        | Q-TOF 8.05.01 (85125)       |              |   |

### Compound Table

| Compound Label         | RT    | Mass     | Abund | Formula         | Tgt Mass | SRF (ppm) | MPG Formula     | DB Formula      |
|------------------------|-------|----------|-------|-----------------|----------|-----------|-----------------|-----------------|
| Cpd 1: C19 H14 Br N O3 | 0.135 | 383.0134 | 24527 | C19 H14 Br N O3 | 383.0137 | -6.14     | C19 H14 Br N O3 | C19 H14 Br N O3 |

| Compound Label         | m/z      | RT    | Algorithm       | Mass     |
|------------------------|----------|-------|-----------------|----------|
| Cpd 1: C19 H14 Br N O3 | 384.0208 | 0.135 | Find By Formula | 383.0134 |

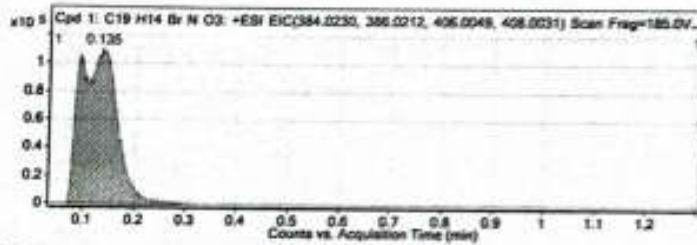

### MS Spectrum

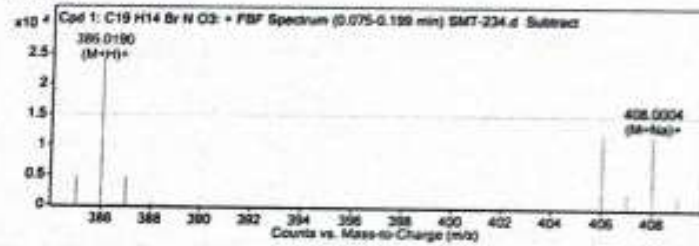

### MS Zoomed Spectrum

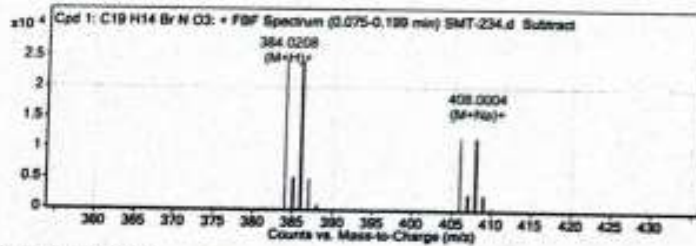

### MS Spectrum Peak List

| m/z      | # | Abund    | Formula       | Ion     |
|----------|---|----------|---------------|---------|
| 384.0208 | 1 | 24526.83 | C19H15BrNO3   | (M+H)+  |
| 385.0239 | 1 | 4718.87  | C19H15BrNO3   | (M+H)+  |
| 386.019  | 1 | 24338.16 | C19H15BrNO3   | (M+H)+  |
| 387.0317 | 1 | 4718.17  | C19H15BrNO3   | (M+H)+  |
| 388.027  | 1 | 675.54   | C19H15BrNO3   | (M+H)+  |
| 389.0322 | 1 | 48.78    | C19H15BrNO3   | (M+H)+  |
| 406.0033 | 1 | 11851.84 | C19H14BrNNaO3 | (M+Na)+ |
| 407.0053 | 1 | 2286.9   | C19H14BrNNaO3 | (M+Na)+ |
| 408.0004 | 1 | 11880.17 | C19H14BrNNaO3 | (M+Na)+ |
| 409.0033 | 1 | 2295.95  | C19H14BrNNaO3 | (M+Na)+ |

<sup>1</sup>H NMR spectrum of 2e (400 MHz, CDCl<sub>3</sub>)

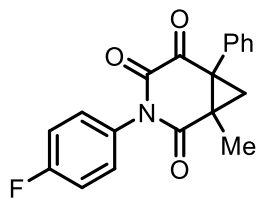

3-(4-fluorophenyl)-1-methyl-6-phenyl-3-azabicyclo[4.1.0]heptane-2,4,5-trione

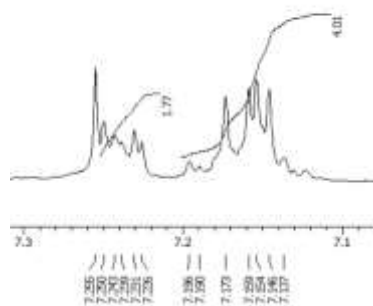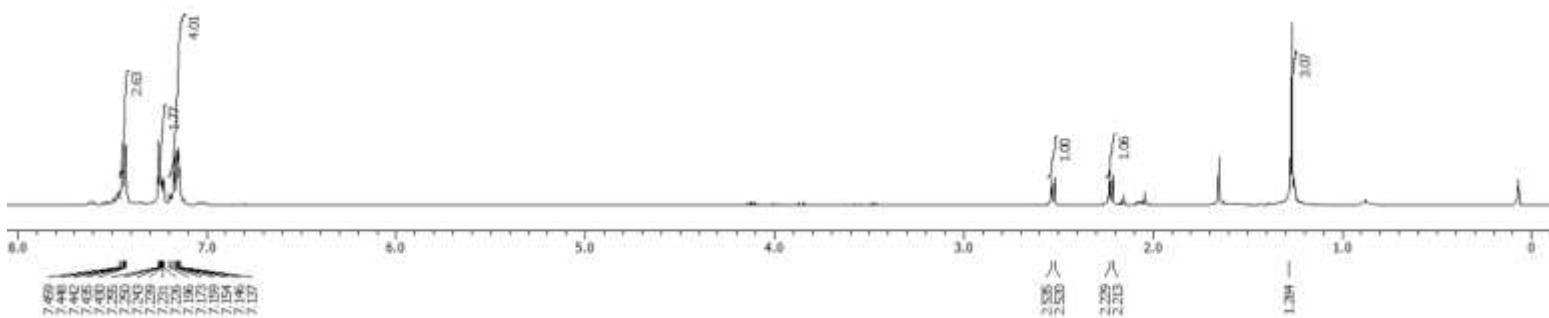



<sup>13</sup>C NMR spectrum of 2e (100 MHz, CDCl<sub>3</sub>)

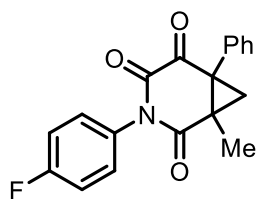

3-(4-fluorophenyl)-1-methyl-6-phenyl-3-azabicyclo[4.1.0]heptane-2,4,5-trione

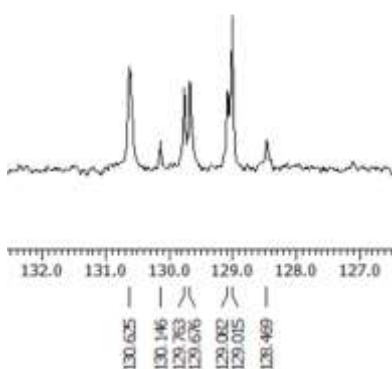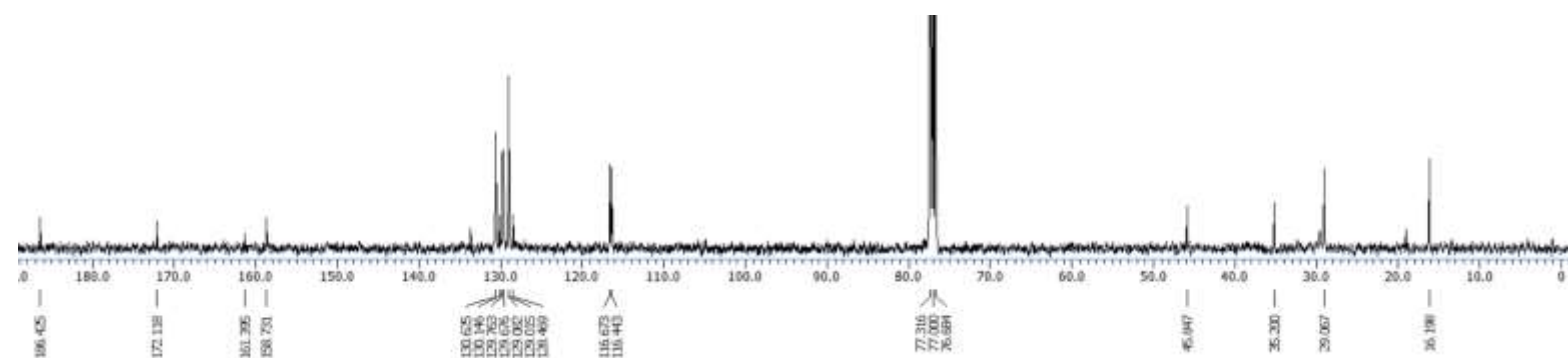

**<sup>19</sup>F NMR spectrum of 2e (376 MHz, CDCl<sub>3</sub>)**

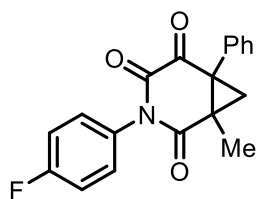

3-(4-fluorophenyl)-1-methyl-6-phenyl-3-azabicyclo[4.1.0]heptane-2,4,5-trione

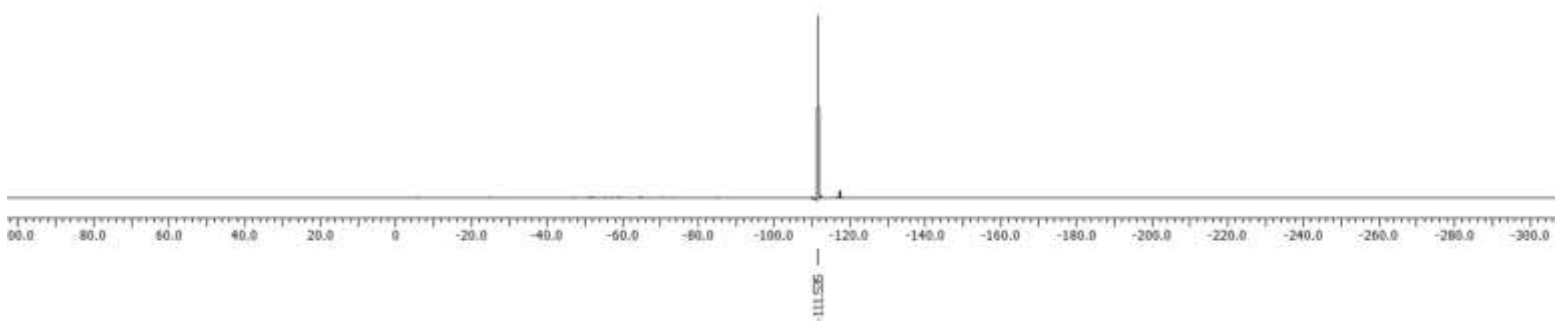

# HRMS spectrum of 2e

## Qualitative Compound Report

|                        |              |               |                     |
|------------------------|--------------|---------------|---------------------|
| Data File              | BMT-240.d    | Sample Name   | BMT-240             |
| Sample Type            | Sample       | Position      | PI-AH               |
| Instrument Name        | Instrument 1 | User Name     |                     |
| Acq Method             | MS Scan.m    | Acquired Time | 24-05-2023 13:13:47 |
| IRM Calibration Status |              | DA Method     | Default.m           |
| Comment                |              |               |                     |

Sample Group: Info: 1  
 Acquisition SW: 6200 series TOF/8900 series  
 Version: Q-TOF R.06.01 (88125)

| Compound Label        | RT    | Mass     | Abund | Formula        | Tot Mass | Diff (ppm) | MS Formula     | DB Formula     |
|-----------------------|-------|----------|-------|----------------|----------|------------|----------------|----------------|
| Cpd 1: C19 H14 F N O3 | 0.142 | 323.0937 | 15758 | C19 H14 F N O3 | 323.0938 | -6.43      | C19 H14 F N O3 | C19 H14 F N O3 |

| Compound Label        | m/z     | RT    | Algorithm       | Mass     |
|-----------------------|---------|-------|-----------------|----------|
| Cpd 1: C19 H14 F N O3 | 346.083 | 0.142 | Find by Formula | 323.0937 |

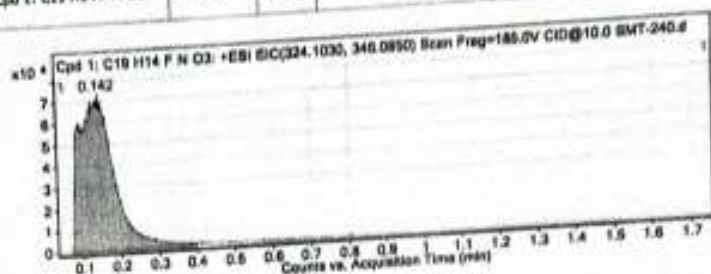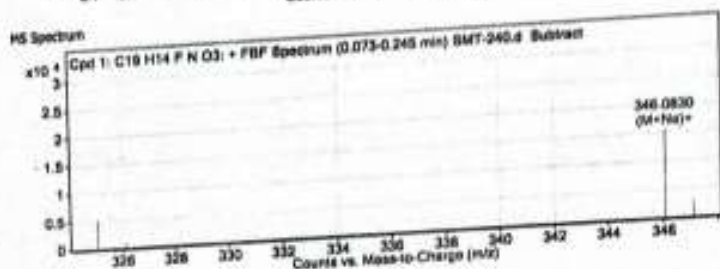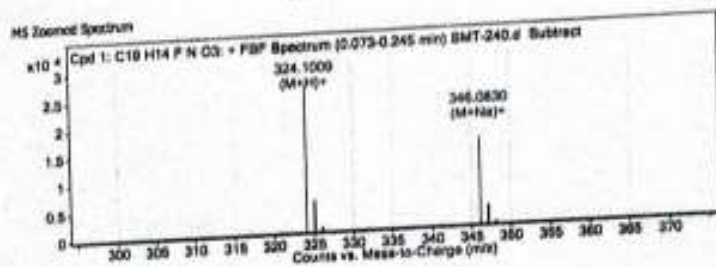

| m/z      | x | Abund    | Formula     | Ion     |
|----------|---|----------|-------------|---------|
| 324.1000 | 1 | 26718.78 | C19H13FN2O3 | (M+H)+  |
| 325.1041 | 1 | 5225.24  | C19H13FN2O3 | (M+H)+  |
| 326.1081 | 1 | 723.59   | C19H13FN2O3 | (M+H)+  |
| 327.1049 | 1 | 18.03    | C19H13FN2O3 | (M+H)+  |
| 346.083  | 1 | 15757.8  | C19H14FN2O3 | (M+Na)+ |
| 347.0863 | 1 | 3222.8   | C19H14FN2O3 | (M+Na)+ |
| 348.0913 | 1 | 274.87   | C19H14FN2O3 | (M+Na)+ |

--- End Of Report ---

**<sup>1</sup>H NMR spectrum of 2f (400 MHz, CDCl<sub>3</sub>)**

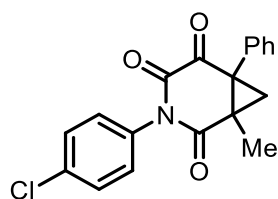

3-(4-chlorophenyl)-1-methyl-6-phenyl-3-azabicyclo[4.1.0]heptane-2,4,5-trione

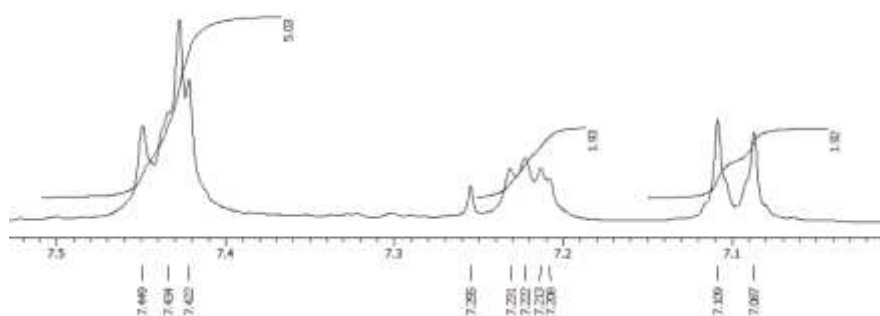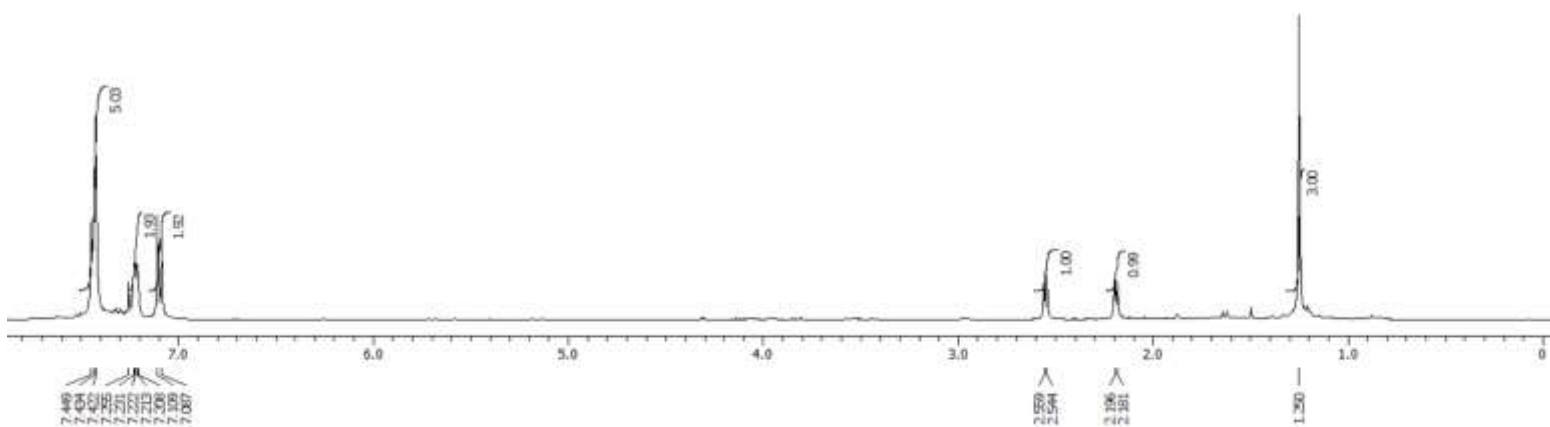

<sup>13</sup>C NMR spectrum of 2f (100 MHz, CDCl<sub>3</sub>)

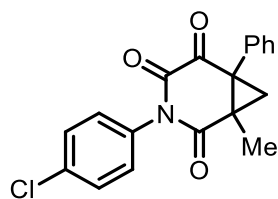

3-(4-chlorophenyl)-1-methyl-6-phenyl-3-azabicyclo[4.1.0]heptane-2,4,5-trione

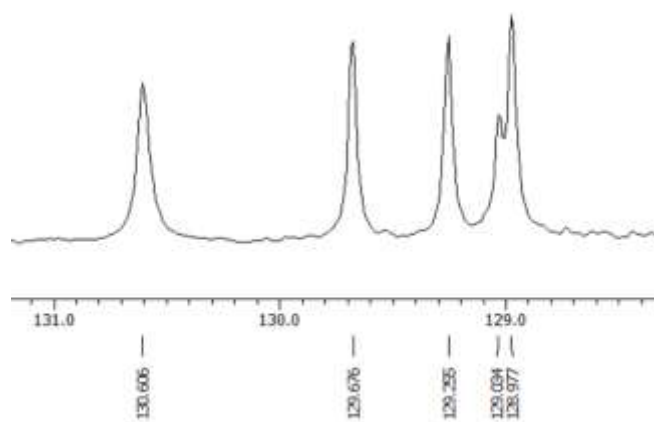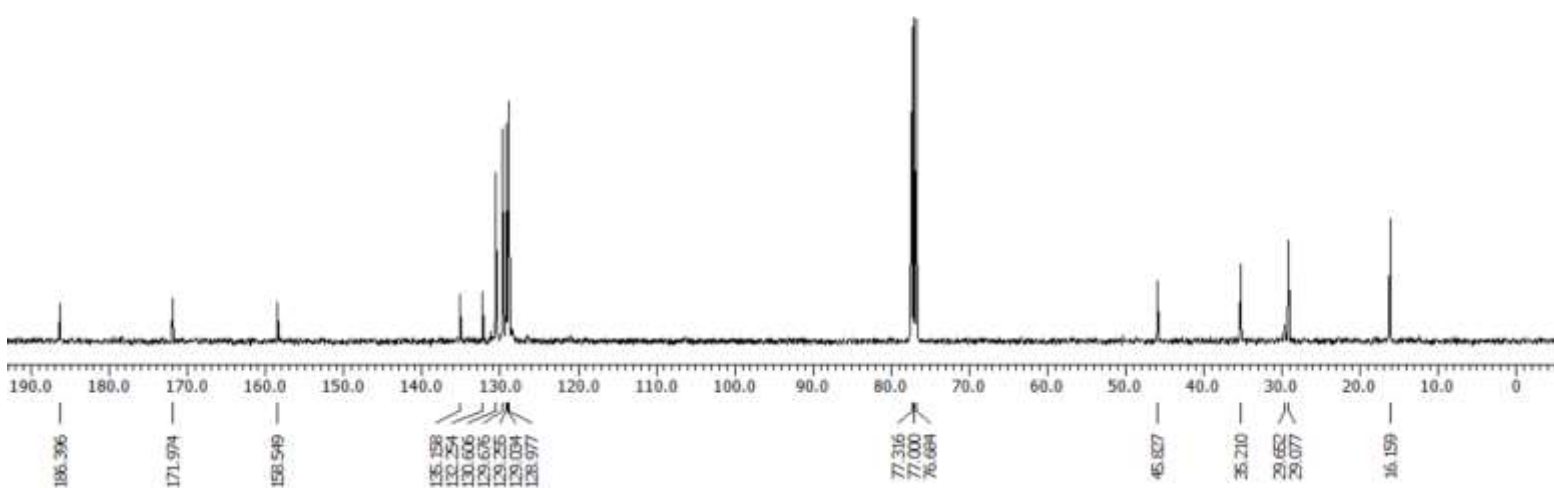

# HRMS spectrum of 2f

## Qualitative Compound Report

|                        |              |               |                     |
|------------------------|--------------|---------------|---------------------|
| Data File              | SMT-242.d    | Sample Name   | SMT-242             |
| Sample Type            | Sample       | Position      | P1-95               |
| Instrument Name        | Instrument 1 | User Name     |                     |
| Acq Method             | MS Scan.m    | Acquired Time | 22-07-2023 13:05:19 |
| IRM Calibration Status |              | DA Method     | Default.m           |
| Comment                |              |               |                     |

|                |                             |   |
|----------------|-----------------------------|---|
| Sample Group   | Info                        | 3 |
| Acquisition SW | 6200 series TOP/6500 series |   |
| Version        | Q-TOF 8.05.01 (85125)       |   |

### Compound Table

| Compound Label      | RT    | Mass     | Abund | Formula      | Tgt Mass | Diff (ppm) | HFG Formula  | DB Formula   |
|---------------------|-------|----------|-------|--------------|----------|------------|--------------|--------------|
| Cpd 1: C19H14ClN O3 | 0.126 | 339.0675 | 32837 | C19H14ClN O3 | 339.0652 | 3.84       | C19H14ClN O3 | C19H14ClN O3 |

| Compound Label      | m/z      | RT    | Algorithm       | Mass     |
|---------------------|----------|-------|-----------------|----------|
| Cpd 1: C19H14ClN O3 | 362.0567 | 0.126 | Find by Formula | 339.0675 |

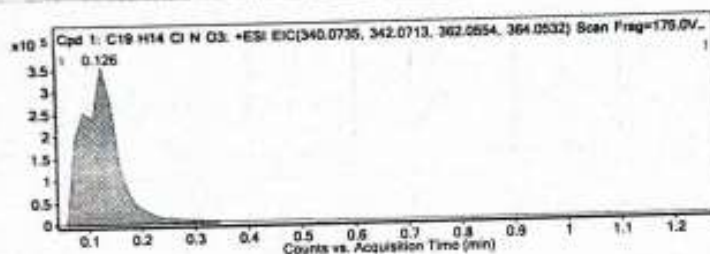

### MS Spectrum

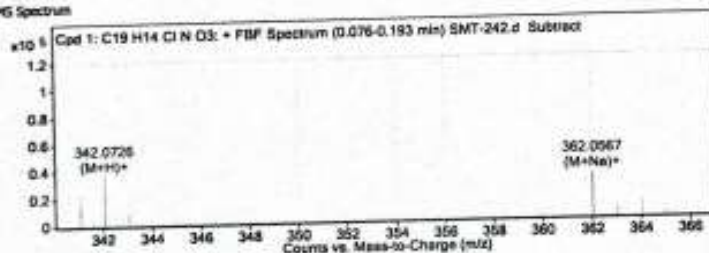

### MS Zoomed Spectrum

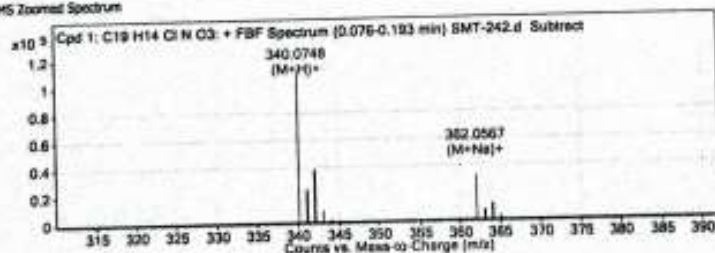

### MS Spectrum Peak List

| m/z      | z | Abund     | Formula       | Ion     |
|----------|---|-----------|---------------|---------|
| 340.0748 | 1 | 111346.74 | C19H15ClNO3   | (M+H)+  |
| 341.0781 | 1 | 22860.83  | C19H15ClNO3   | (M+H)+  |
| 342.0728 | 1 | 37245.43  | C19H15ClNO3   | (M+H)+  |
| 343.0756 | 1 | 7693.04   | C19H15ClNO3   | (M+H)+  |
| 344.0807 | 1 | 1307.77   | C19H15ClNO3   | (M+H)+  |
| 345.0846 | 1 | 184.16    | C19H15ClNO3   | (M+H)+  |
| 362.0567 | 1 | 32827.05  | C19H14ClNNaO3 | (M+Na)+ |
| 363.0598 | 1 | 6730.05   | C19H14ClNNaO3 | (M+Na)+ |
| 364.0545 | 1 | 11288.64  | C19H14ClNNaO3 | (M+Na)+ |
| 365.057  | 1 | 2384.01   | C19H14ClNNaO3 | (M+Na)+ |
| 366.0624 | 1 | 388.24    | C19H14ClNNaO3 | (M+Na)+ |

**<sup>1</sup>H NMR spectrum of 2g (400 MHz, CDCl<sub>3</sub>)**

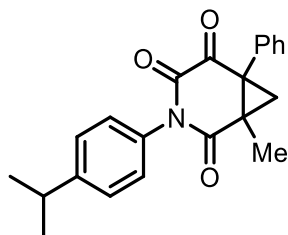

3-(4-isopropylphenyl)-1-methyl-6-phenyl-3-azabicyclo[4.1.0]heptane-2,4,5-trione

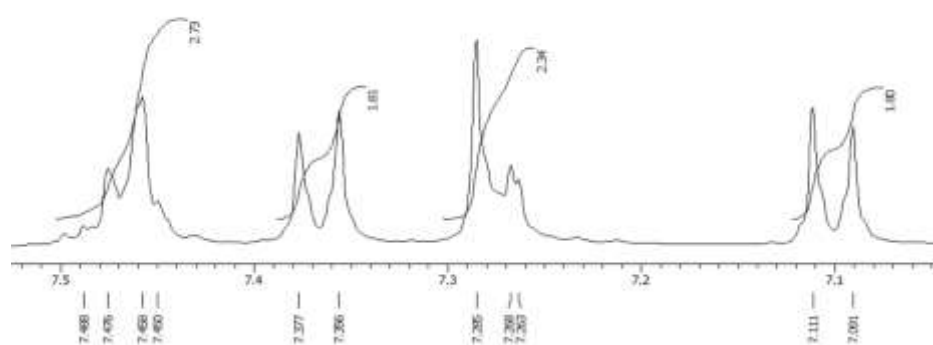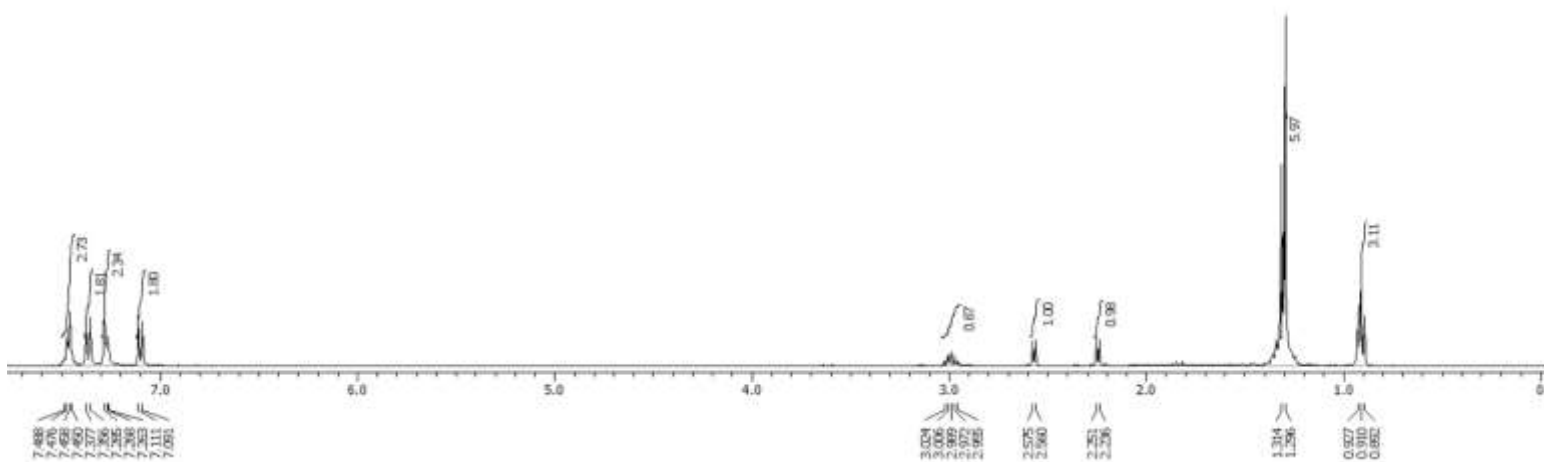

<sup>13</sup>C NMR spectrum of 2g (100 MHz, CDCl<sub>3</sub>)

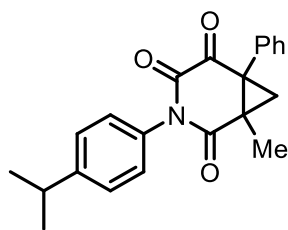

3-(4-isopropylphenyl)-1-methyl-6-phenyl-3-azabicyclo[4.1.0]heptane-2,4,5-trione

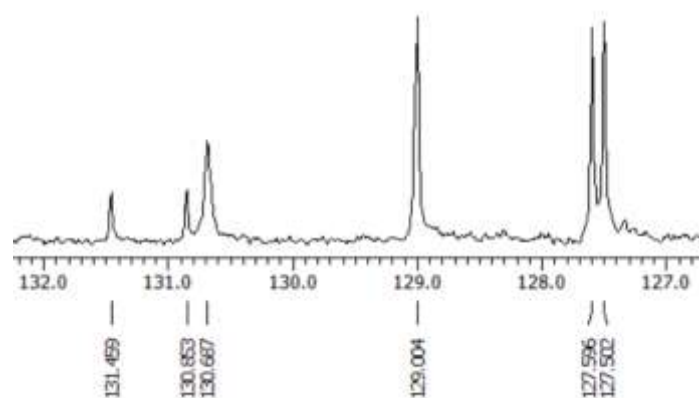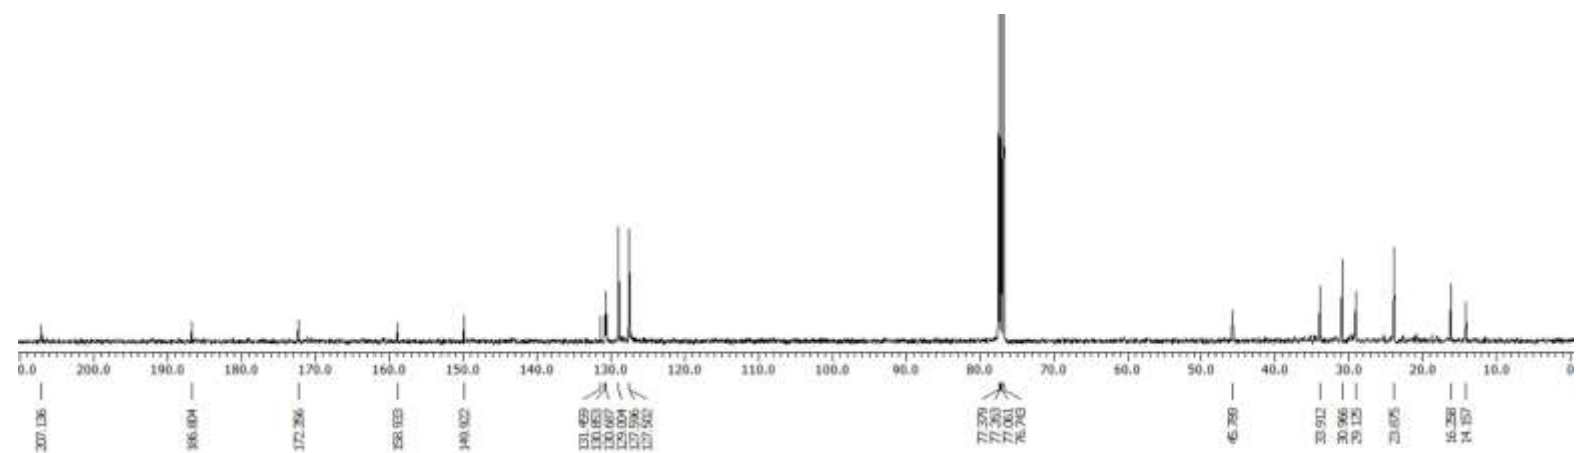



# HRMS spectrum of 2g

|                    |                 |                               |         |                        |                                 |
|--------------------|-----------------|-------------------------------|---------|------------------------|---------------------------------|
| <b>Sample Name</b> | SMT 359         | <b>Position</b>               | P1-B7   | <b>Instrument Name</b> | BIOQTOF                         |
| <b>User Name</b>   | SYSTEM (SYSTEM) | <b>Inj Vol</b>                | 1       | <b>InjPosition</b>     |                                 |
| <b>Sample Type</b> | Sample          | <b>IRM Calibration Status</b> | Success | <b>Data Filename</b>   | SMT 359.d                       |
| <b>ACQ Method</b>  | Pos_100ACN.m    | <b>Comment</b>                |         | <b>Acquired Time</b>   | 27-04-2024 12:46:32 (UTC+05:30) |

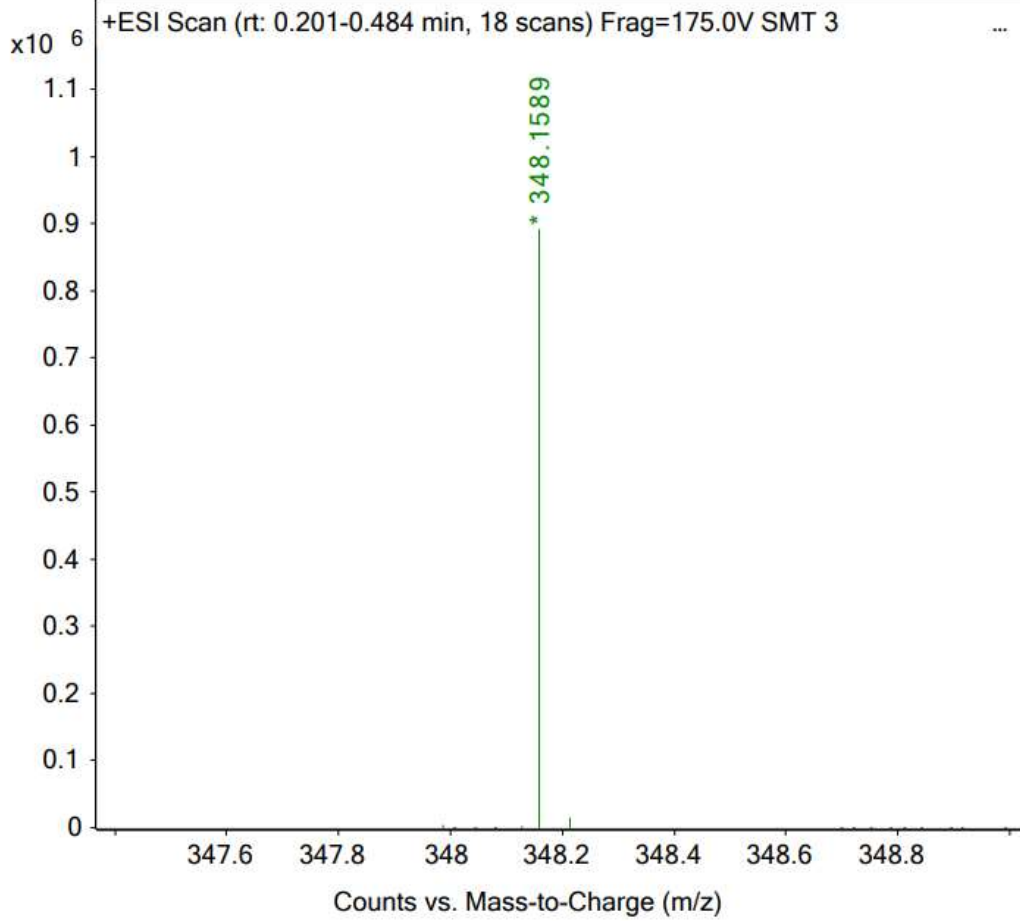

<sup>1</sup>H NMR spectrum of 2h (400 MHz, CDCl<sub>3</sub>)

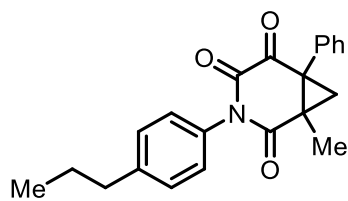

1-methyl-6-phenyl-3-(4-propylphenyl)-3-azabicyclo[4.1.0]heptane-2,4,5-trione

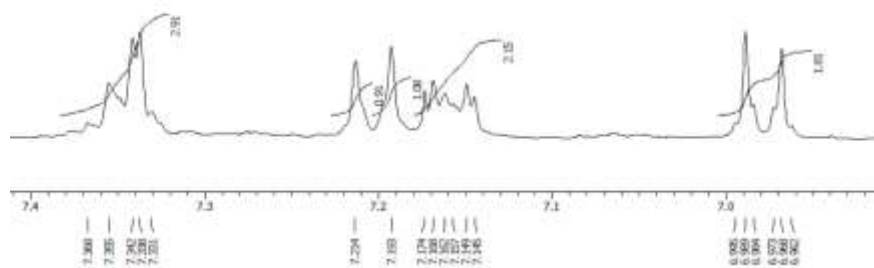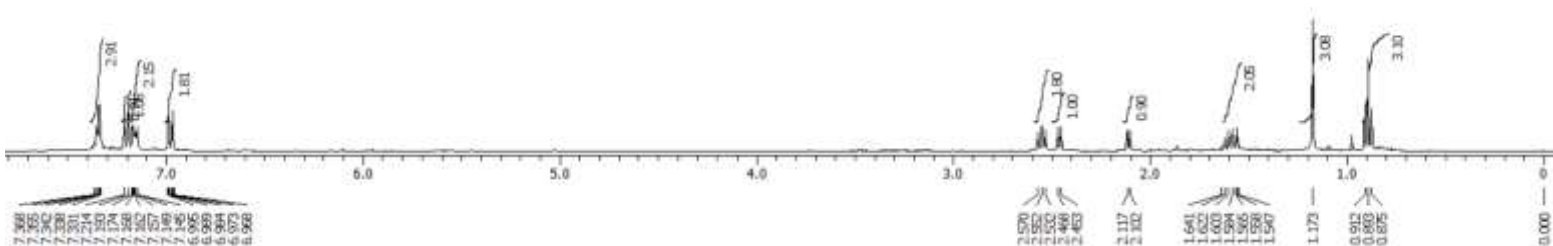

<sup>13</sup>C NMR spectrum of 2h (100 MHz, CDCl<sub>3</sub>)



1-methyl-6-phenyl-3-(4-propylphenyl)-3-azabicyclo[4.1.0]heptane-2,4,5-trione

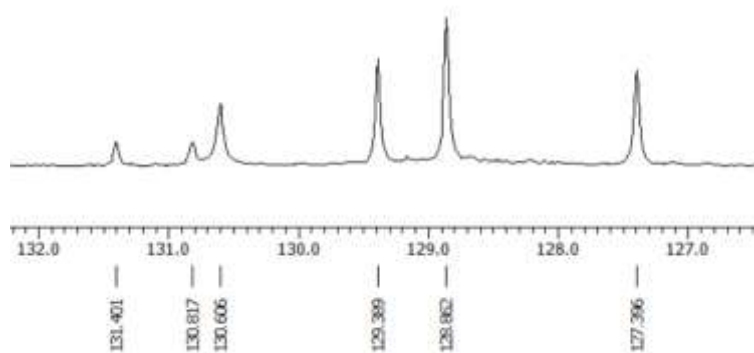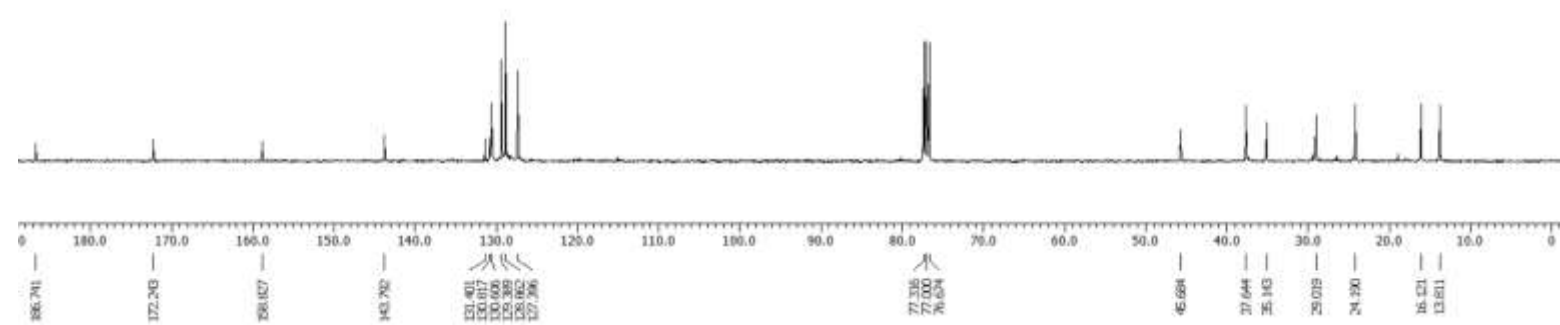

# HRMS spectrum of 2h

## Qualitative Compound Report

|                        |              |               |                     |
|------------------------|--------------|---------------|---------------------|
| Data File              | SMT-365.d    | Sample Name   | SMT-365             |
| Sample Type            | Sample       | Position      | P1-A7               |
| Instrument Name        | Instrument 1 | User Name     |                     |
| Acq Method             | MS Scan.m    | Acquired Time | 25-11-2023 12:41:27 |
| IRM Calibration Status |              | DA Method     | Default.m           |
| Comment                |              |               |                     |

|                |                              |   |
|----------------|------------------------------|---|
| Sample Group   | Info.                        | 3 |
| Acquisition SW | 6300 series TOF/MS500 series |   |
| Version        | Q-TOF 8.05.01 (05125)        |   |

### Compound Table

| Compound Label      | RT    | Mass     | Abund  | Formula      | Tgt Mass | Diff (ppm) | MPG Formula  | DB Formula   |
|---------------------|-------|----------|--------|--------------|----------|------------|--------------|--------------|
| Cpd 1: C22 H21 N O3 | 0.112 | 347.1506 | 191228 | C22 H21 N O3 | 347.1521 | -4.51      | C22 H21 N O3 | C22 H21 N O3 |

| Compound Label      | m/z      | RT    | Algorithm       | Mass     |
|---------------------|----------|-------|-----------------|----------|
| Cpd 1: C22 H21 N O3 | 348.1578 | 0.112 | Find By Formula | 347.1506 |

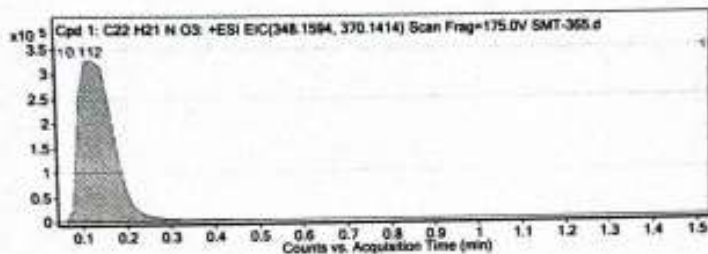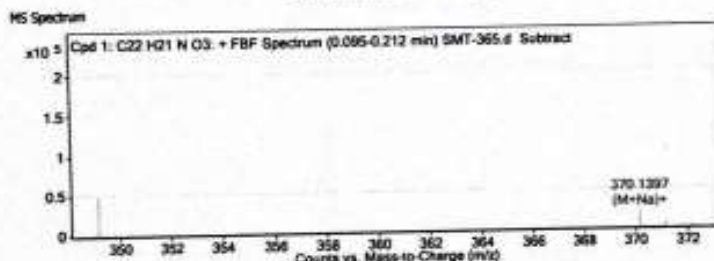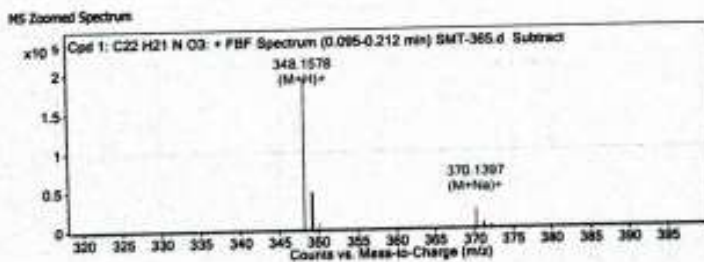

### MS Spectrum Peak List

| m/z      | z | Abund     | Formula     | Ion     |
|----------|---|-----------|-------------|---------|
| 348.1578 | 1 | 191227.56 | C22H22NO3   | (M+H)+  |
| 349.1612 | 1 | 47687     | C22H22NO3   | (M+H)+  |
| 370.1397 | 1 | 22229.52  | C22H21NNaO3 | (M+Na)+ |
| 371.1395 | 1 | 5565.53   | C22H21NNaO3 | (M+Na)+ |
| 372.1514 | 1 | 3474.86   | C22H21NNaO3 | (M+Na)+ |
| 373.1561 | 1 | 947.02    | C22H21NNaO3 | (M+Na)+ |

-- End Of Report --

**<sup>1</sup>H NMR spectrum of 2i (400 MHz, CDCl<sub>3</sub>)**

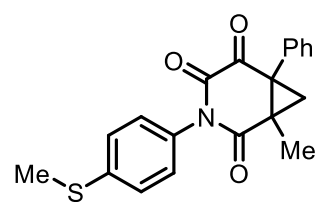

1-methyl-3-(4-(methylthio)phenyl)-6-phenyl-3-azabicyclo[4.1.0]heptane-2,4,5-trione

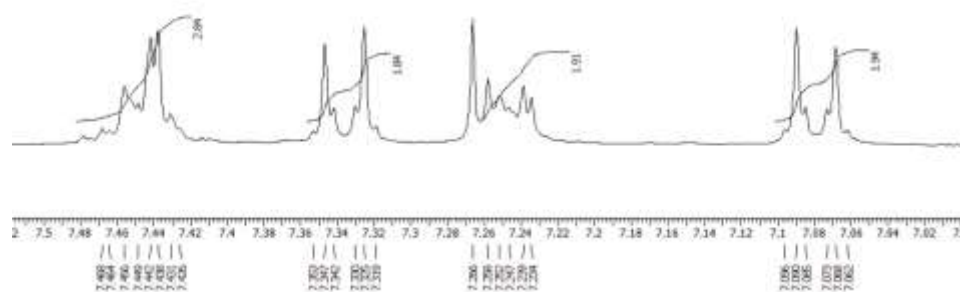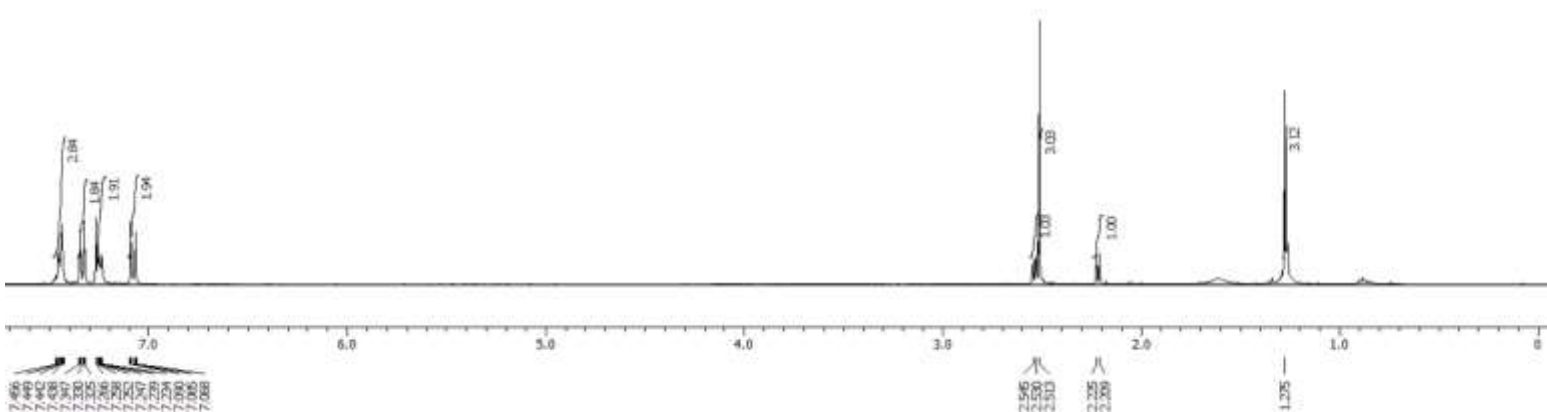

**<sup>13</sup>C NMR spectrum of 2i (100 MHz, CDCl<sub>3</sub>)**

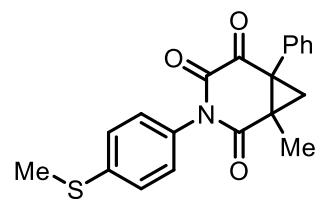

1-methyl-3-(4-(methylthio)phenyl)-6-phenyl-3-azabicyclo[4.1.0]heptane-2,4,5-trione

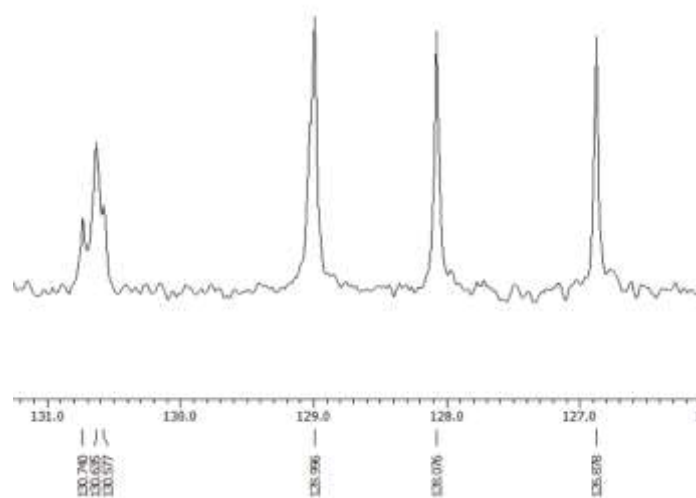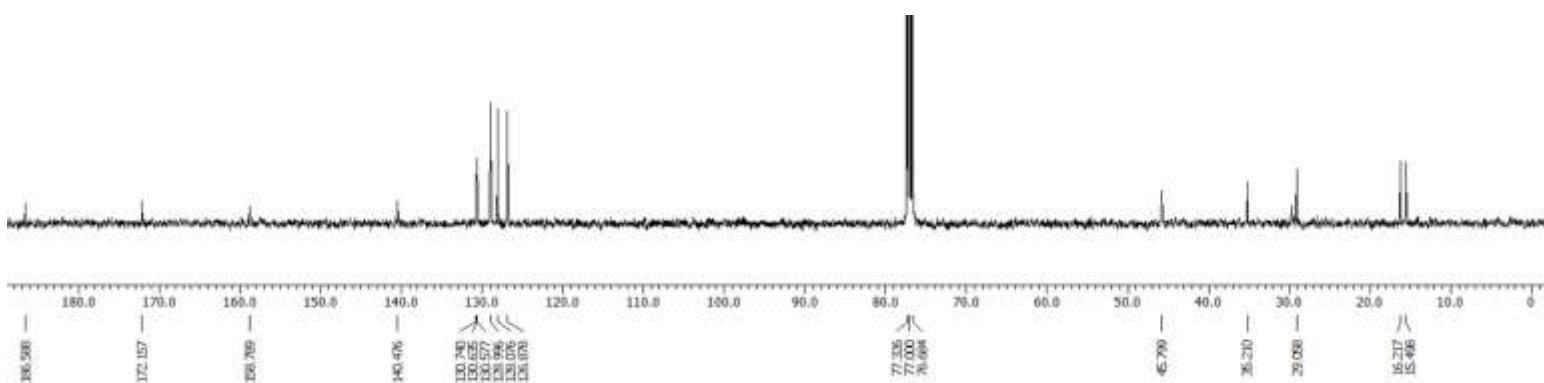

# HRMS spectrum of 2i

|                    |                 |                               |         |                        |                                 |
|--------------------|-----------------|-------------------------------|---------|------------------------|---------------------------------|
| <b>Sample Name</b> | SMT 361         | <b>Position</b>               | P1-B6   | <b>Instrument Name</b> | BIOQTOF                         |
| <b>User Name</b>   | SYSTEM (SYSTEM) | <b>Inj Vol</b>                | 1       | <b>InjPosition</b>     |                                 |
| <b>Sample Type</b> | Sample          | <b>IRM Calibration Status</b> | Success | <b>Data Filename</b>   | SMT 361.d                       |
| <b>ACQ Method</b>  | Pos_100ACN.m    | <b>Comment</b>                |         | <b>Acquired Time</b>   | 27-04-2024 12:42:40 (UTC+05:30) |

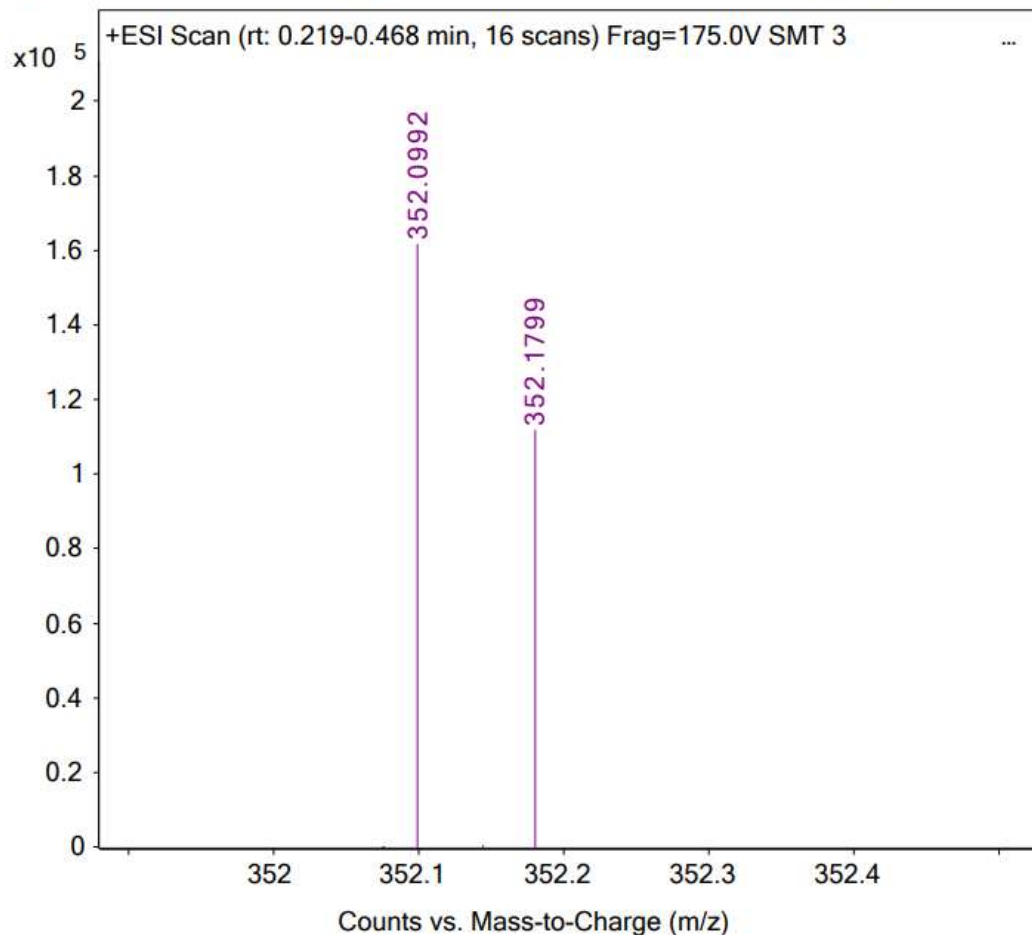

<sup>1</sup>H NMR spectrum of 2j (400 MHz, CDCl<sub>3</sub>)

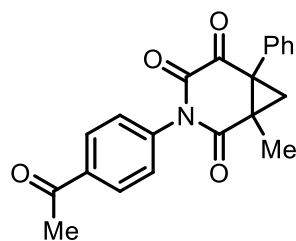

3-(4-acetylphenyl)-1-methyl-6-phenyl-3-azabicyclo[4.1.0]heptane-2,4,5-trione

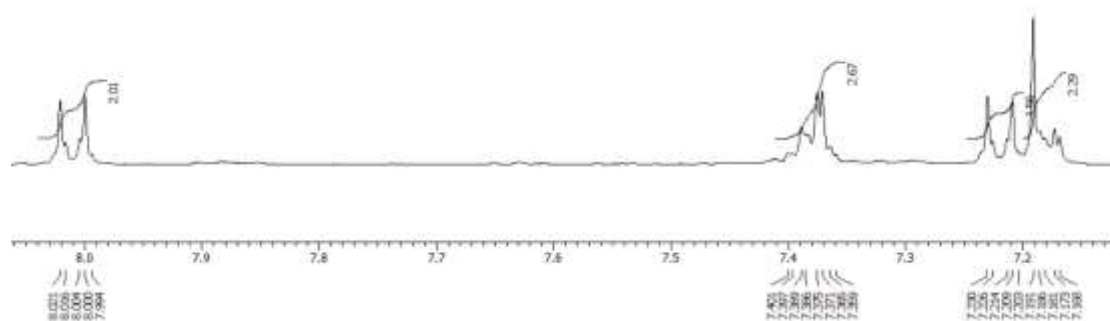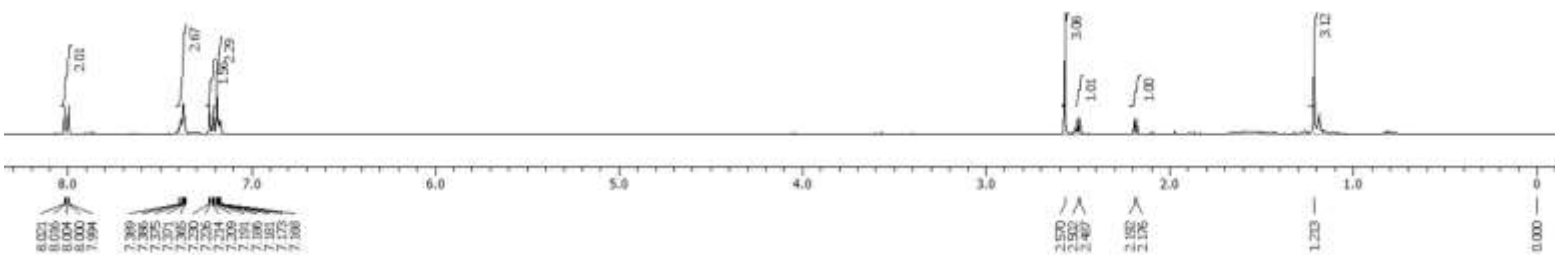



<sup>13</sup>C NMR spectrum of 2j (100 MHz, CDCl<sub>3</sub>)

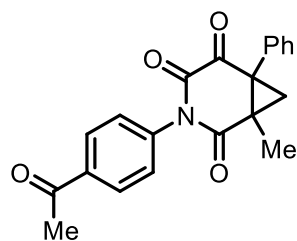

3-(4-acetylphenyl)-1-methyl-6-phenyl-3-azabicyclo[4.1.0]heptane-2,4,5-trione

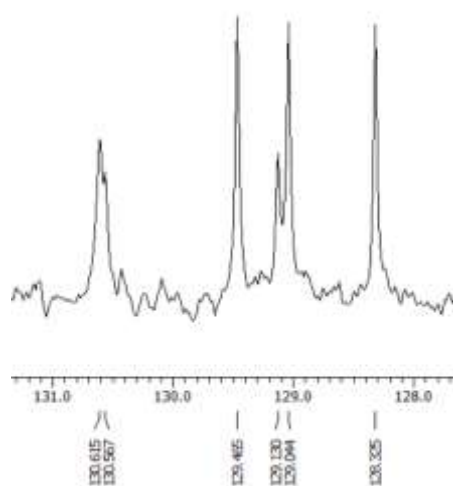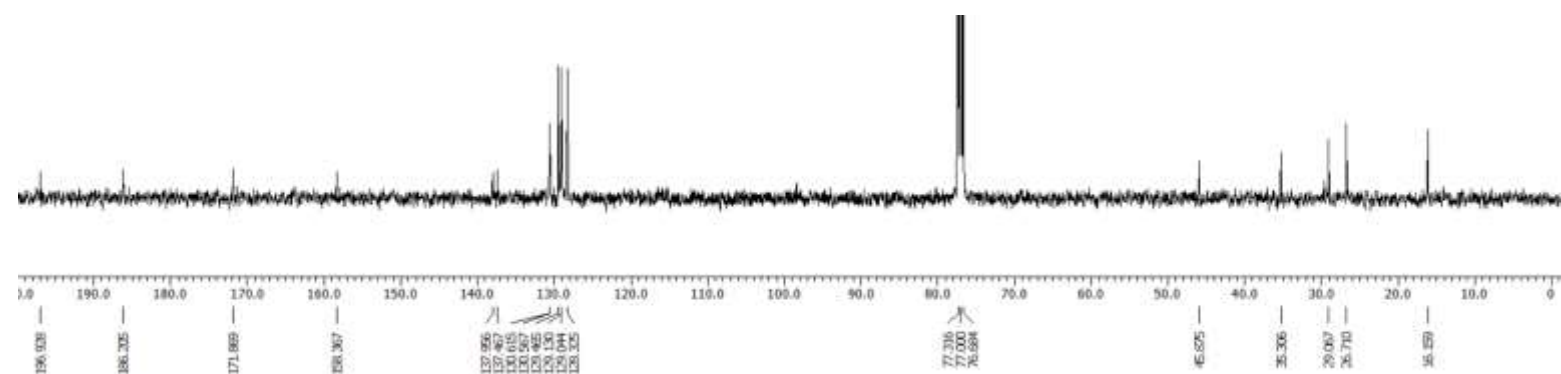

# HRMS spectrum of 2j

|                    |                 |                               |         |                        |                                 |
|--------------------|-----------------|-------------------------------|---------|------------------------|---------------------------------|
| <b>Sample Name</b> | SMT 366         | <b>Position</b>               | P1-B9   | <b>Instrument Name</b> | BIOQTOF                         |
| <b>User Name</b>   | SYSTEM (SYSTEM) | <b>Inj Vol</b>                | 1       | <b>InjPosition</b>     |                                 |
| <b>Sample Type</b> | Sample          | <b>IRM Calibration Status</b> | Success | <b>Data Filename</b>   | SMT 366.d                       |
| <b>ACQ Method</b>  | Pos_100ACN.m    | <b>Comment</b>                |         | <b>Acquired Time</b>   | 27-04-2024 12:54:16 (UTC+05:30) |

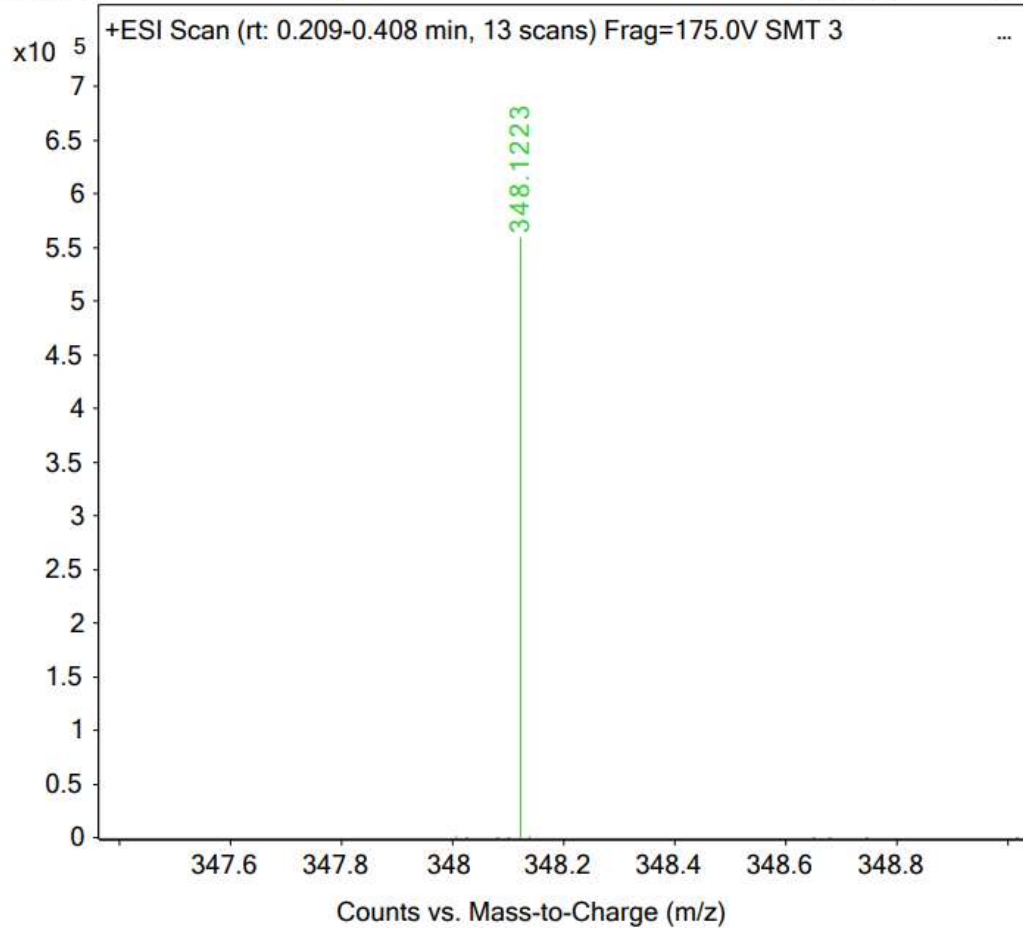

<sup>1</sup>H NMR spectrum of 2k (400 MHz, CDCl<sub>3</sub>)

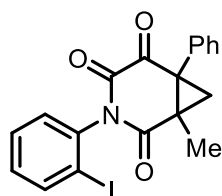

3-(2-iodophenyl)-1-methyl-6-phenyl-3-azabicyclo[4.1.0]heptane-2,4,5-trione

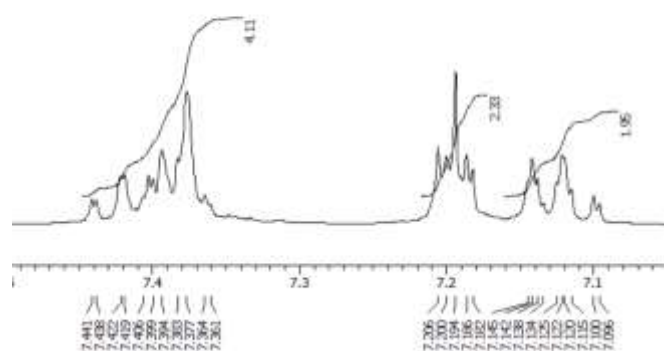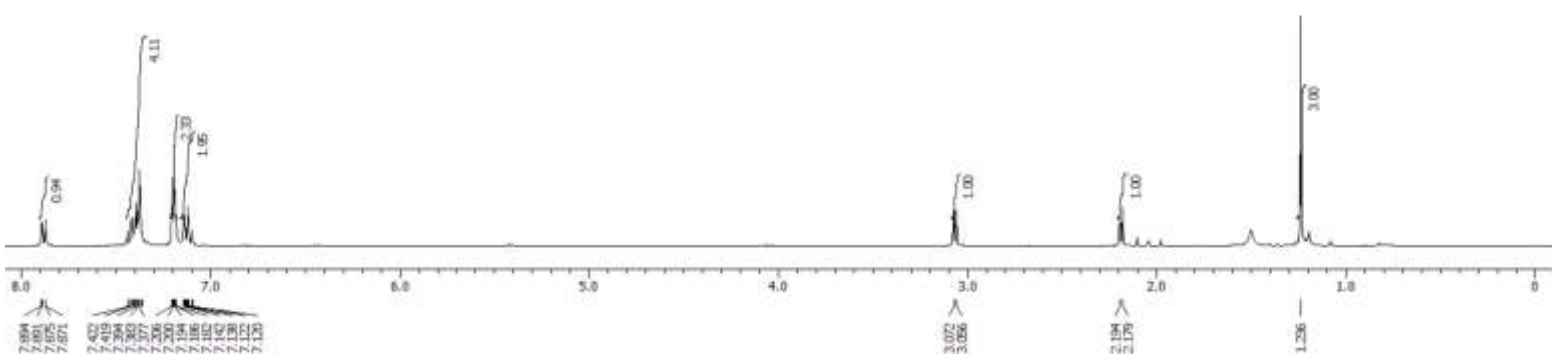

<sup>13</sup>C NMR spectrum of 2k (100 MHz, CDCl<sub>3</sub>)



3-(2-iodophenyl)-1-methyl-6-phenyl-3-azabicyclo[4.1.0]heptane-2,4,5-trione

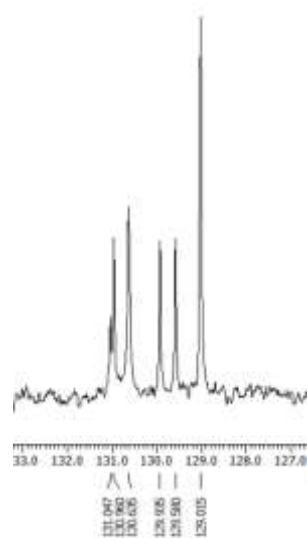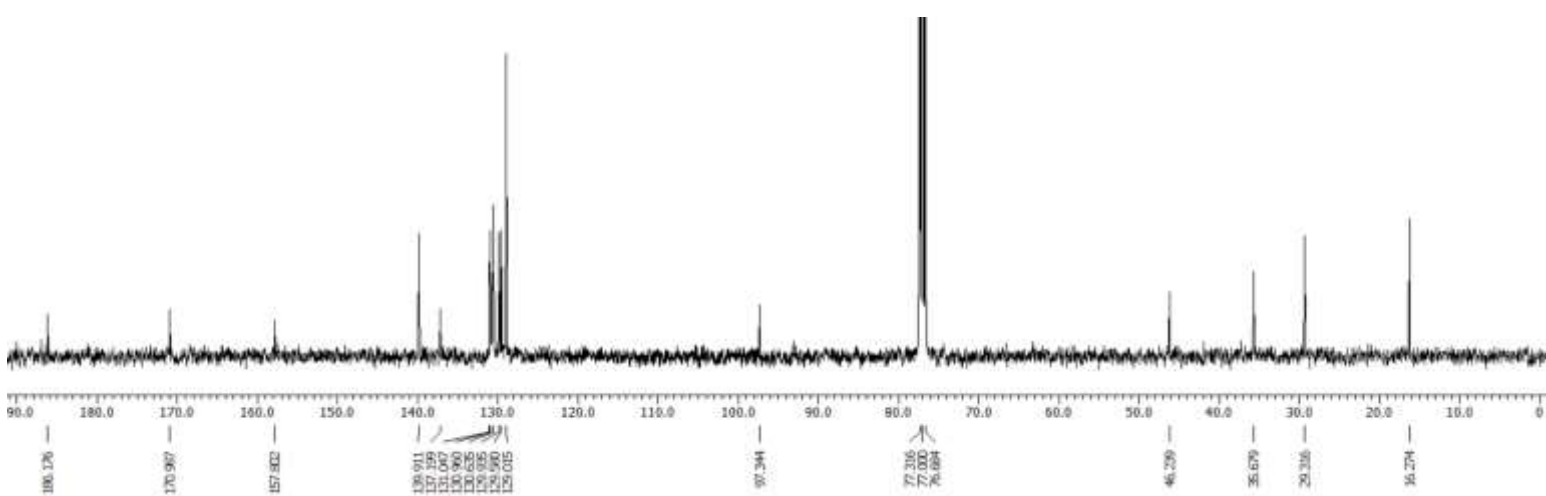

# HRMS spectrum of 2k

## Qualitative Compound Report

|                        |              |               |                     |
|------------------------|--------------|---------------|---------------------|
| Data File              | SMT-239.d    | Sample Name   | SMT-239             |
| Sample Type            | Sample       | Position      | P1-A5               |
| Instrument Name        | Instrument 1 | User Name     |                     |
| Acq Method             | MS Scan.m    | Acquired Time | 10-04-2023 13:52:20 |
| IRN Calibration Status |              | DA Method     | Default.m           |
| Comment                |              |               |                     |

|                |                             |       |   |
|----------------|-----------------------------|-------|---|
| Sample Group   |                             | Info. | 3 |
| Acquisition SW | 6200 series TOF/6500 series |       |   |
| Version        | Q-TOF B.05.01 (85125)       |       |   |

### Compound Table

| Compound Label        | RT    | Mass     | Abund | Formula        | Tgt Mass | Diff (ppm) | MPG Formula    | DB Formula     |
|-----------------------|-------|----------|-------|----------------|----------|------------|----------------|----------------|
| Cpd 1: C19 H14 I N O3 | 0.122 | 431.0014 | 2459  | C19 H14 I N O3 | 431.0018 | -0.95      | C19 H14 I N O3 | C19 H14 I N O3 |

| Compound Label        | m/z      | RT    | Algorithm       | Mass     |
|-----------------------|----------|-------|-----------------|----------|
| Cpd 1: C19 H14 I N O3 | 453.9908 | 0.122 | Find by Formula | 431.0014 |

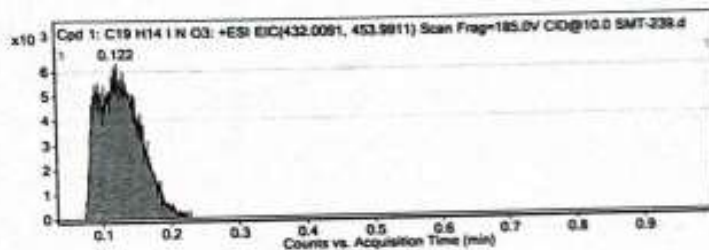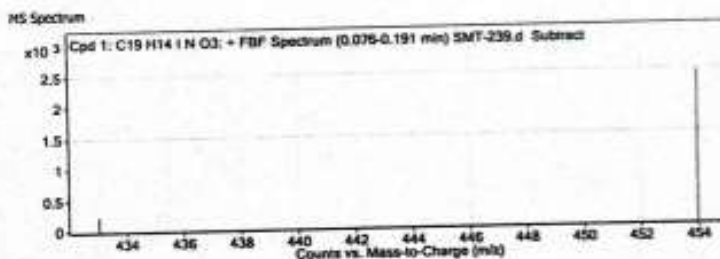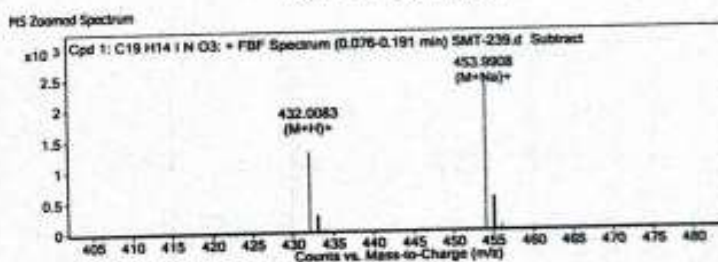

### MS Spectrum Peak List

| m/z      | z | Abund   | Formula     | Ion     |
|----------|---|---------|-------------|---------|
| 432.0083 | 1 | 1290.66 | C19H15NO3   | (M+I)+  |
| 433.0112 | 1 | 231.3   | C19H15NO3   | (M+I)+  |
| 453.9908 | 1 | 2459.19 | C19H14INaO3 | (M+Na)+ |
| 454.9945 | 1 | 511.43  | C19H14INaO3 | (M+Na)+ |

-- End Of Report --

**<sup>1</sup>H NMR spectrum of 2l (400 MHz, CDCl<sub>3</sub>)**

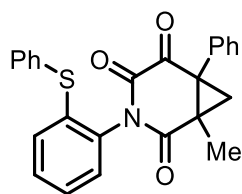

1-methyl-6-phenyl-3-(2-(phenylthio)phenyl)-3-azabicyclo[4.1.0]heptane-2,4,5-trione

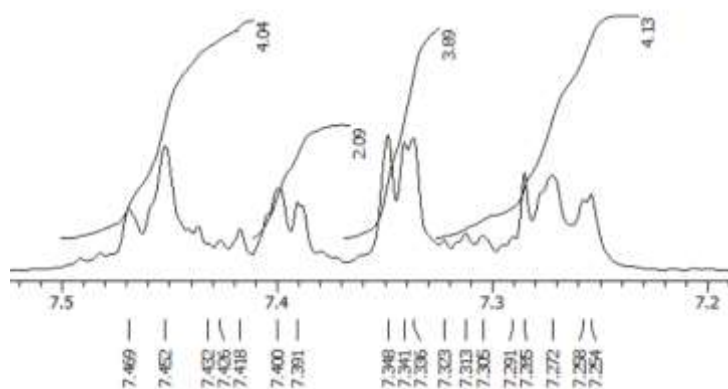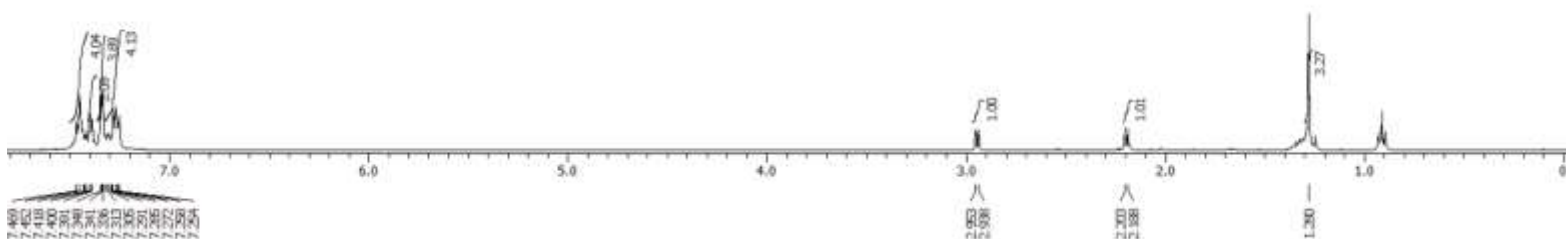

<sup>13</sup>C NMR spectrum of 2l (100 MHz, CDCl<sub>3</sub>)

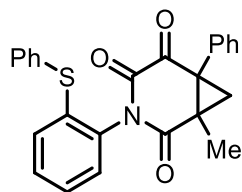

1-methyl-6-phenyl-3-(2-(phenylthio)phenyl)-3-azabicyclo[4.1.0]heptane-2,4,5-trione

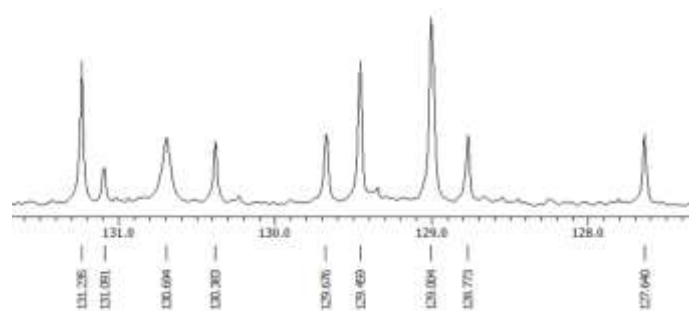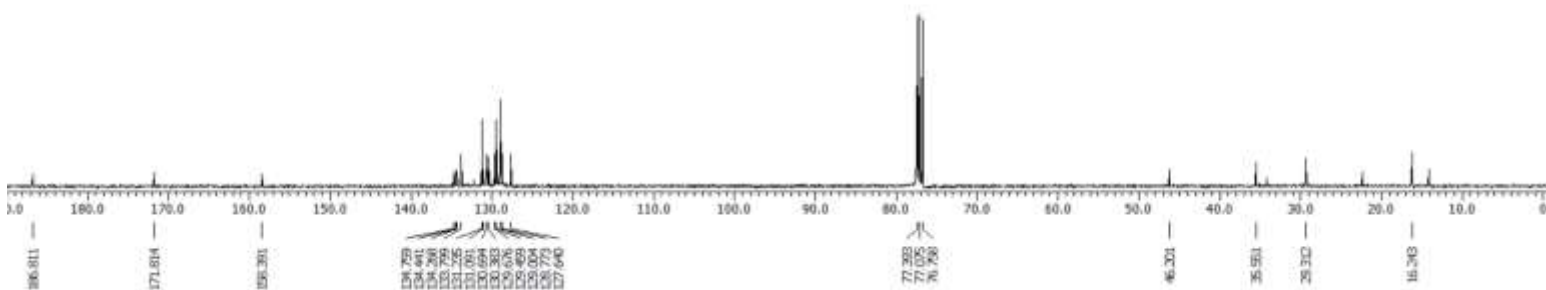

# HRMS spectrum of 2l

|                    |                 |                               |         |                        |                                 |
|--------------------|-----------------|-------------------------------|---------|------------------------|---------------------------------|
| <b>Sample Name</b> | SMT 360         | <b>Position</b>               | P1-A10  | <b>Instrument Name</b> | BIOQTOF                         |
| <b>User Name</b>   | SYSTEM (SYSTEM) | <b>Inj Vol</b>                | 1       | <b>InjPosition</b>     |                                 |
| <b>Sample Type</b> | Sample          | <b>IRM Calibration Status</b> | Success | <b>Data Filename</b>   | SMT 360.d                       |
| <b>ACQ Method</b>  | Pos_100ACN.m    | <b>Comment</b>                |         | <b>Acquired Time</b>   | 27-04-2024 12:15:35 (UTC+05:30) |

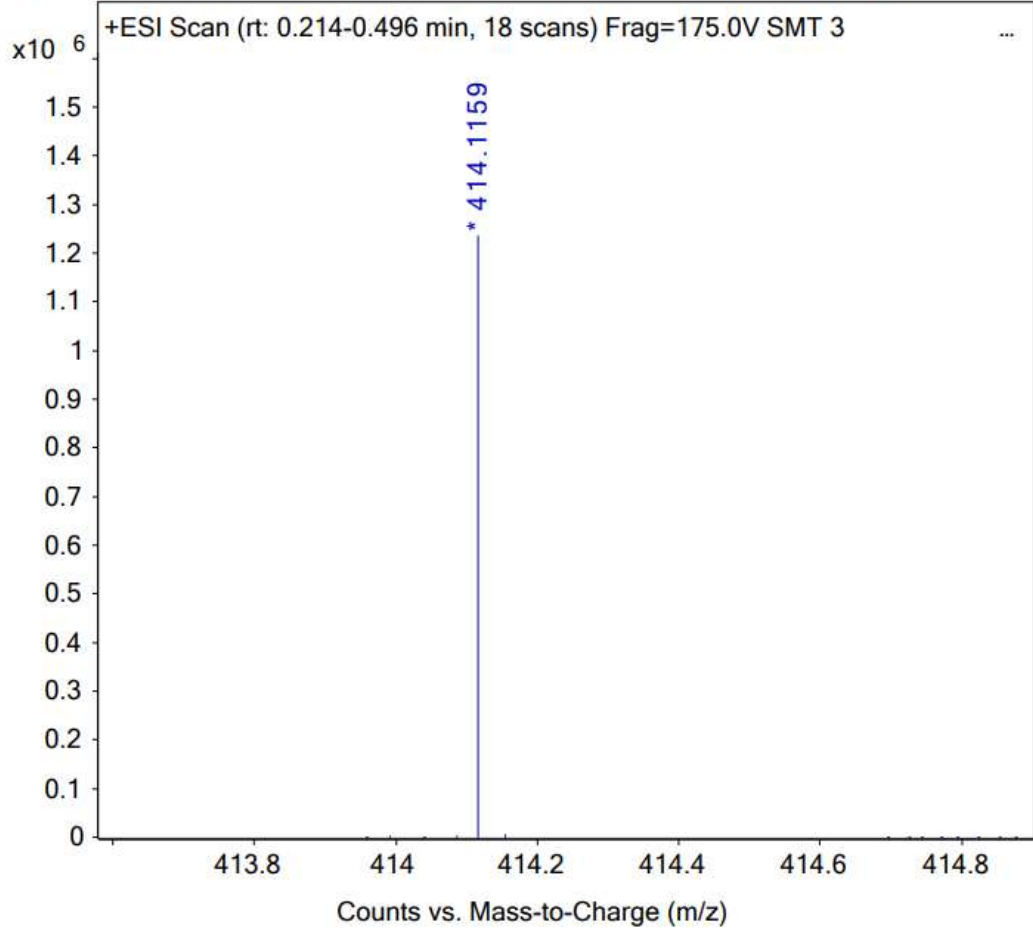



<sup>1</sup>H NMR spectrum of 2m (400 MHz, CDCl<sub>3</sub>)

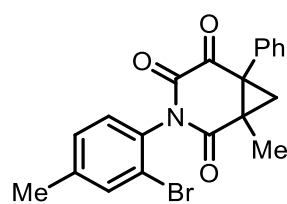

3-(2-bromo-4-methylphenyl)-1-methyl-6-phenyl-3-azabicyclo[4.1.0]heptane-2,4,5-trione

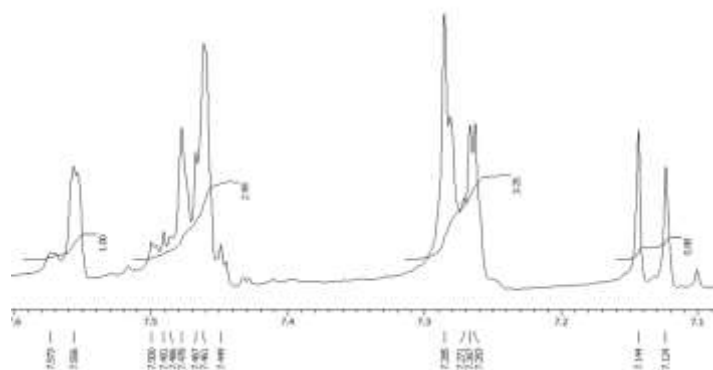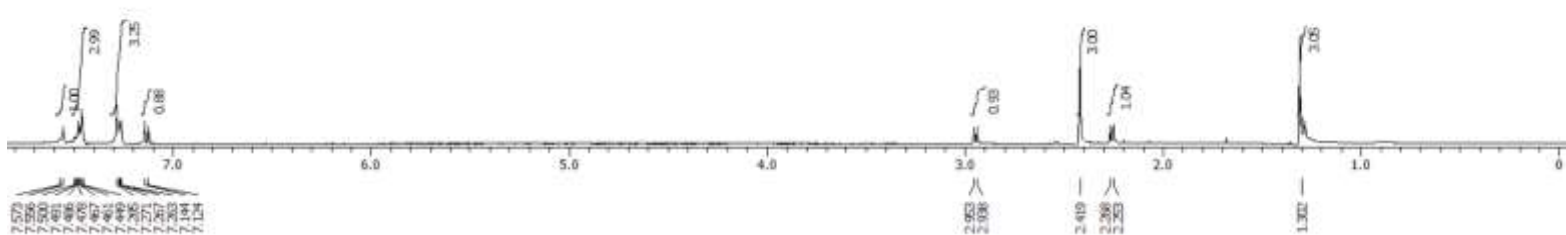

<sup>13</sup>C NMR spectrum of 2m (100 MHz, CDCl<sub>3</sub>)

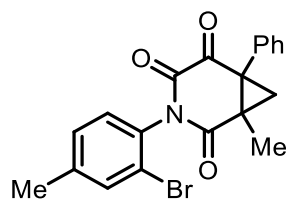

3-(2-bromo-4-methylphenyl)-1-methyl-6-phenyl-3-azabicyclo[4.1.0]heptane-2,4,5-trione

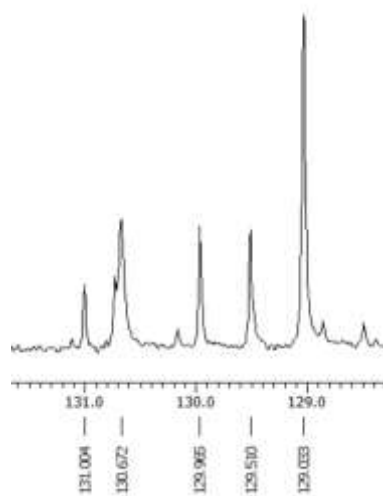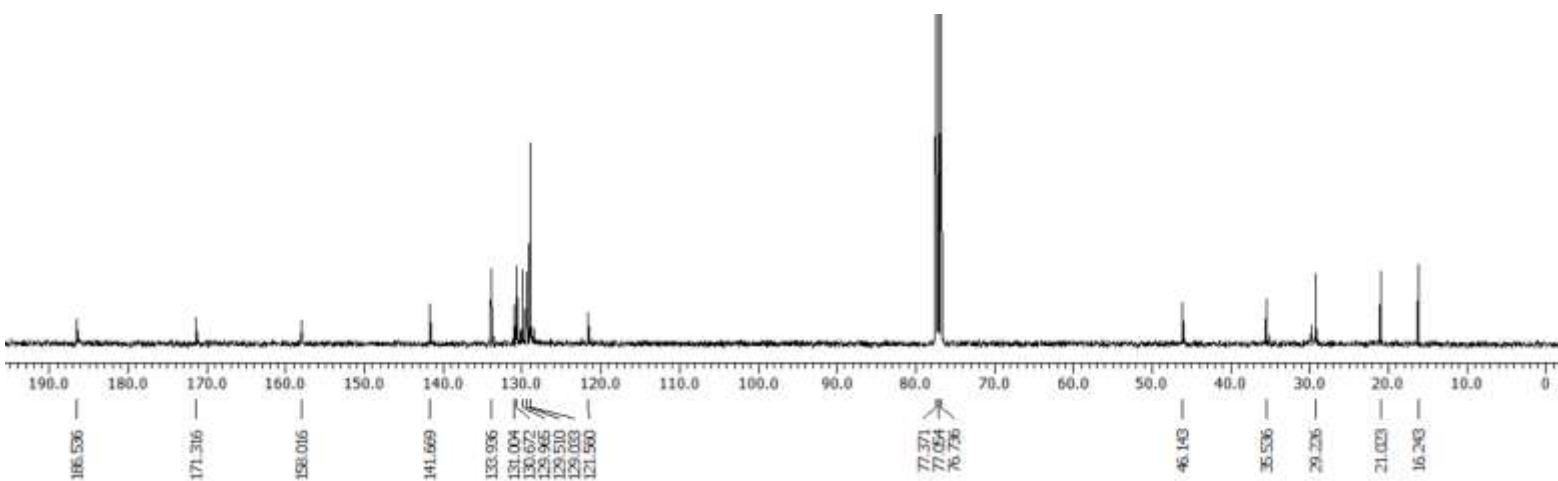

# HRMS spectrum of 2m

## Qualitative Compound Report

|                        |              |               |                     |
|------------------------|--------------|---------------|---------------------|
| Data File              | SMT-291.d    | Sample Name   | SMT-291             |
| Sample Type            | Sample       | Position      | PI-02               |
| Instrument Name        | Instrument 1 | User Name     |                     |
| Acq Method             | MS Scan.m    | Acquired Time | 09-08-2023 14:18:31 |
| IRM Calibration Status |              | DA Method     | Default.m           |
| Comment                |              |               |                     |

|                |                             |   |  |
|----------------|-----------------------------|---|--|
| Sample Group   | Info.                       | 3 |  |
| Acquisition SW | 6200 series TOF/6500 series |   |  |
| Version        | Q-TOF 8.05.01 (MS125)       |   |  |

### Compound Table

| Compound Label         | RT    | Mass     | Abund | Formula         | Tgt Mass | Diff (ppm) | MFG Formula     | DB Formula      |
|------------------------|-------|----------|-------|-----------------|----------|------------|-----------------|-----------------|
| Cpd 1: C20 H16 Br N O3 | 0.125 | 397.0331 | 58652 | C20 H16 Br N O3 | 397.0314 | -4.34      | C20 H16 Br N O3 | C20 H16 Br N O3 |

| Compound Label         | m/z      | RT    | Algorithm       | Mass     |
|------------------------|----------|-------|-----------------|----------|
| Cpd 1: C20 H16 Br N O3 | 400.0387 | 0.125 | Find By Formula | 397.0331 |

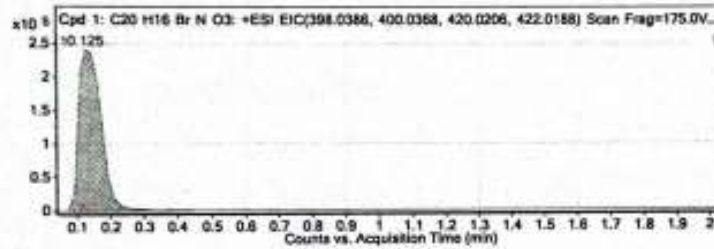

### MS Spectrum

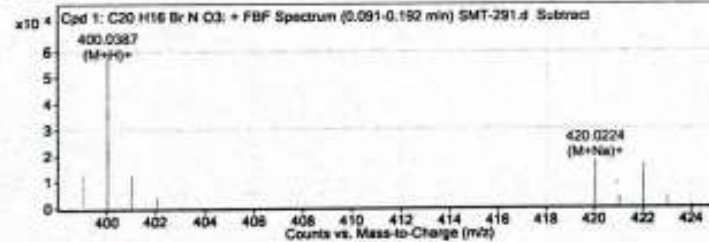

### MS Zoomed Spectrum

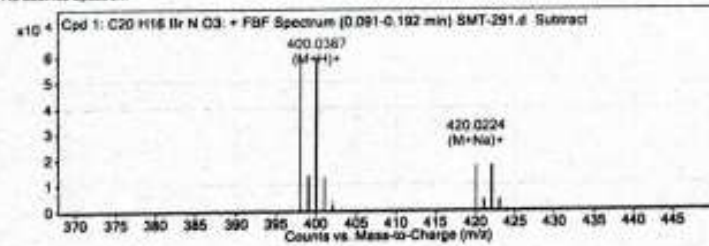

### MS Spectrum Peak List

| m/z      | # | Abund    | Formula      | Ion     |
|----------|---|----------|--------------|---------|
| 398.04   | 1 | 58228.86 | C20H17BrNO3  | (M+H)+  |
| 399.0429 | 1 | 12843.39 | C20H17BrNO3  | (M+H)+  |
| 400.0387 | 1 | 58652.48 | C20H17BrNO3  | (M+H)+  |
| 401.0417 | 1 | 12783.69 | C20H17BrNO3  | (M+H)+  |
| 402.0432 | 1 | 4070.82  | C20H17BrNO3  | (M+H)+  |
| 403.0522 | 1 | 860.16   | C20H17BrNO3  | (M+H)+  |
| 420.0224 | 1 | 17402.69 | C20H16BrNaO3 | (M+Na)+ |
| 421.0264 | 1 | 3901.49  | C20H16BrNaO3 | (M+Na)+ |
| 422.0207 | 1 | 16613.83 | C20H16BrNaO3 | (M+Na)+ |
| 423.0235 | 1 | 3922.7   | C20H16BrNaO3 | (M+Na)+ |
| 424.0274 | 1 | 781.98   | C20H16BrNaO3 | (M+Na)+ |

**<sup>1</sup>H NMR spectrum of 2n (400 MHz, CDCl<sub>3</sub>)**

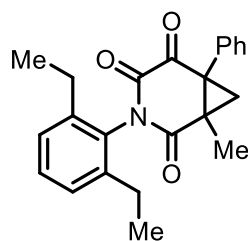

3-(2,6-diethylphenyl)-1-methyl-6-phenyl-3-azabicyclo[4.1.0]heptane-2,4,5-trione

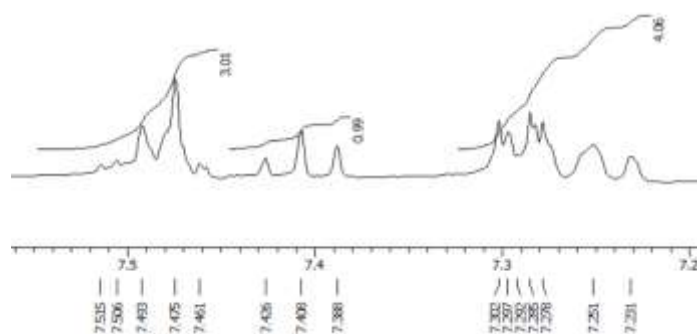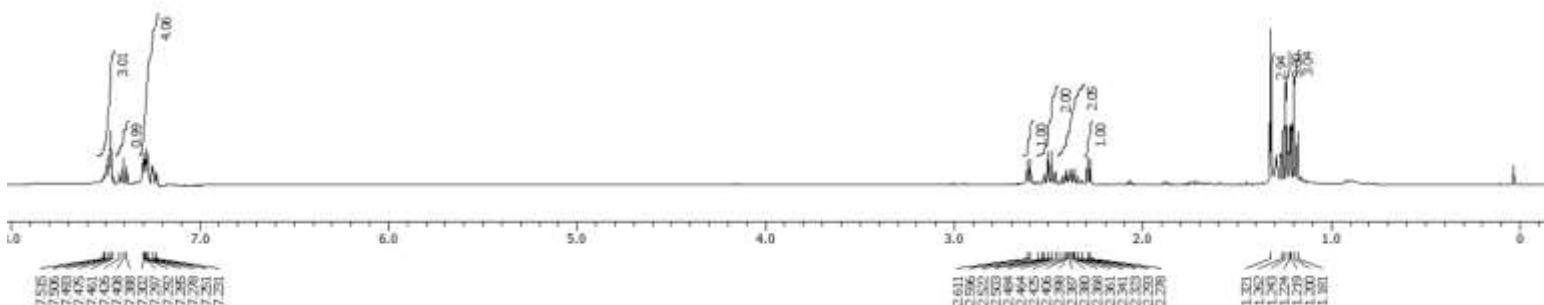

<sup>13</sup>C NMR spectrum of 2n (100 MHz, CDCl<sub>3</sub>)

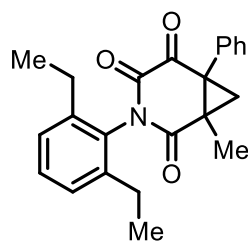

3-(2,6-diethylphenyl)-1-methyl-6-phenyl-3-azabicyclo[4.1.0]heptane-2,4,5-trione

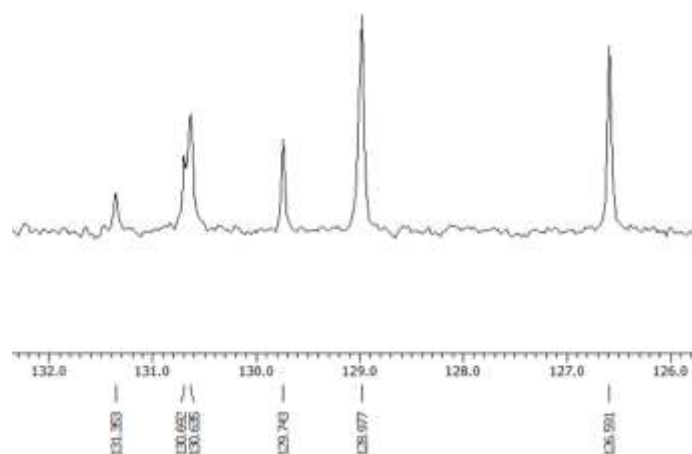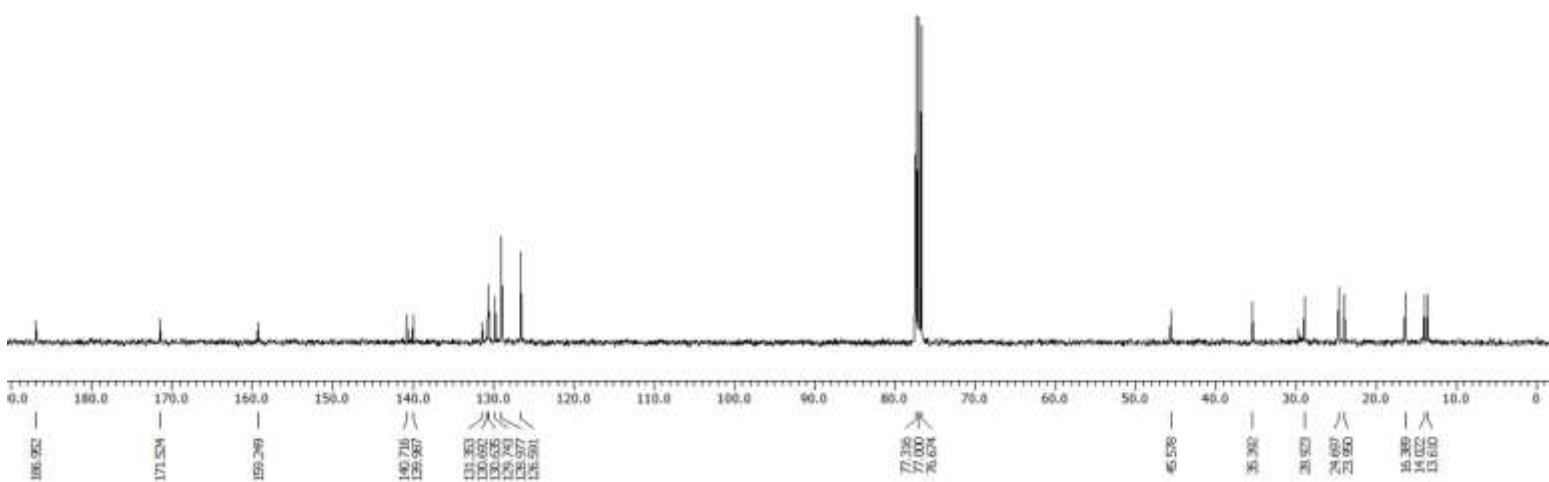

# HRMS spectrum of 2n

## Qualitative Compound Report

|                        |              |               |                     |
|------------------------|--------------|---------------|---------------------|
| Data File              | SMT-327.d    | Sample Name   | SMT-327             |
| Sample Type            | Sample       | Position      | FI-01               |
| Environment Name       | Instrument 1 | User Name     |                     |
| Acq Method             | MS Scan.m    | Acquired Time | 11-10-2023 14:24:18 |
| IRN Calibration Status |              | DA Method     | Default.m           |
| Comment                |              |               |                     |

|                |                             |  |   |
|----------------|-----------------------------|--|---|
| Sample Group   | Info.                       |  | 3 |
| Acquisition SW | 6200 series TOF/5500 series |  |   |
| Version        | Q-TOF 8.05.01 (85125)       |  |   |

### Compound Table

| Compound Label      | RT    | Mass     | Abund  | Formula      | Tot Mass | Diff (ppm) | HFG Formula  | DB Formula   |
|---------------------|-------|----------|--------|--------------|----------|------------|--------------|--------------|
| Cpd 1: C23 H23 N O3 | 0.108 | 361.1698 | 140472 | C23 H23 N O3 | 361.1678 | 5.4        | C23 H23 N O3 | C23 H23 N O3 |

| Compound Label      | m/z      | RT    | Algorithm       | Mass     |
|---------------------|----------|-------|-----------------|----------|
| Cpd 1: C23 H23 N O3 | 362.1768 | 0.108 | Find By Formula | 361.1658 |

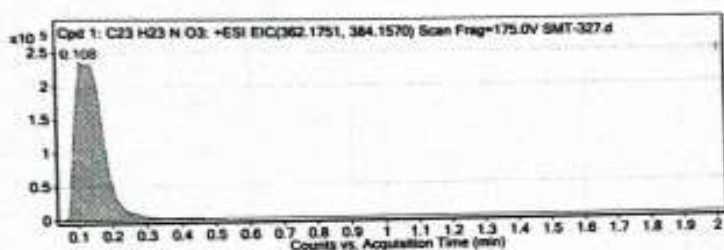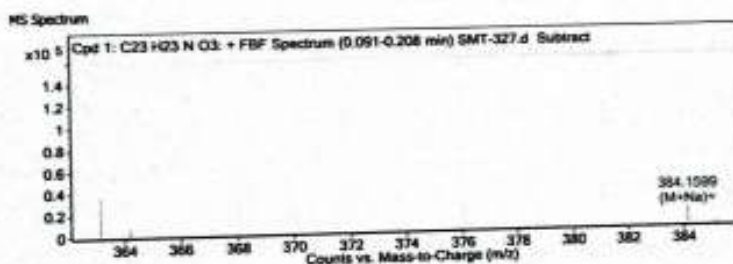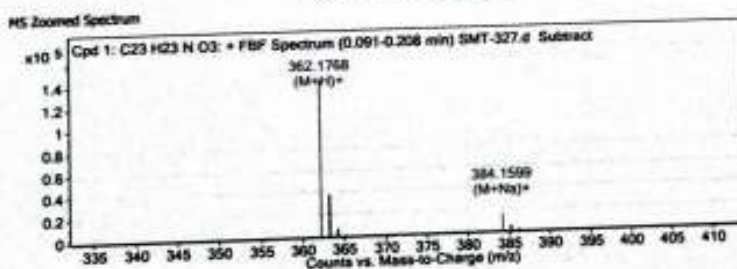

### MS Spectrum Peak List

| m/z      | z | Abund     | Formula     | Ion     |
|----------|---|-----------|-------------|---------|
| 362.1768 | 1 | 140471.73 | C23H24NO3   | (H+H)+  |
| 363.1801 | 1 | 35844.18  | C23H24NO3   | (H+H)+  |
| 364.1859 | 1 | 7459.89   | C23H24NO3   | (M+H)+  |
| 365.1917 | 1 | 1485.31   | C23H24NO3   | (M+H)+  |
| 384.1599 | 1 | 15211.84  | C23H23NNaO3 | (H+Na)+ |
| 385.1637 | 1 | 3289.82   | C23H23NNaO3 | (H+Na)+ |
| 386.1661 | 1 | 937.49    | C23H23NNaO3 | (M+Na)+ |

— End Of Report —

**<sup>1</sup>H NMR spectrum of 2o (400 MHz, CDCl<sub>3</sub>)**

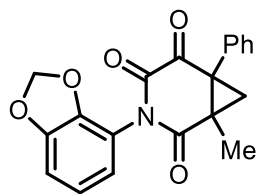

3-(benzo[d][1,3]dioxol-4-yl)-1-methyl-6-phenyl-3-azabicyclo[4.1.0]heptane-2,4,5-trione

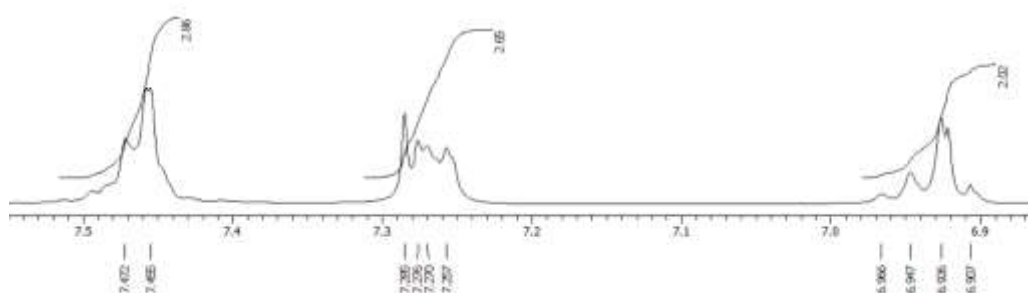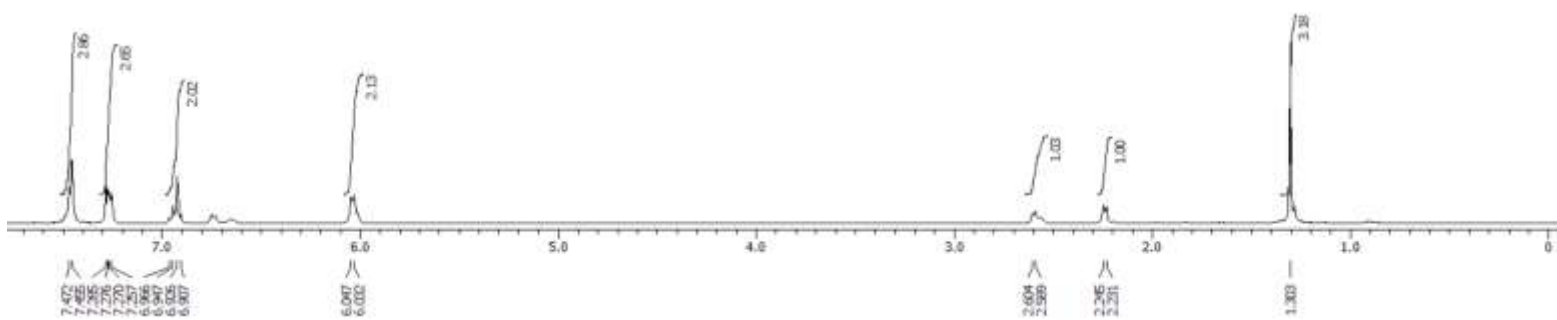

<sup>13</sup>C NMR spectrum of 2o (100 MHz, CDCl<sub>3</sub>)

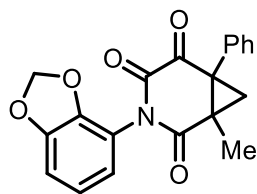

3-(benzo[d][1,3]dioxol-4-yl)-1-methyl-6-phenyl-3-azabicyclo[4.1.0]heptane-2,4,5-trione

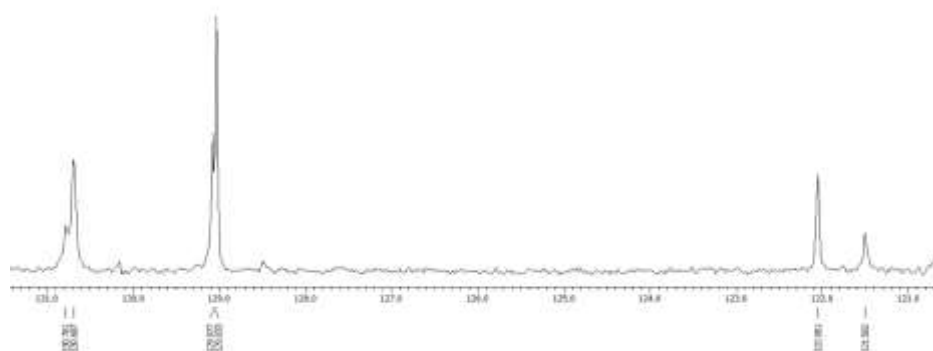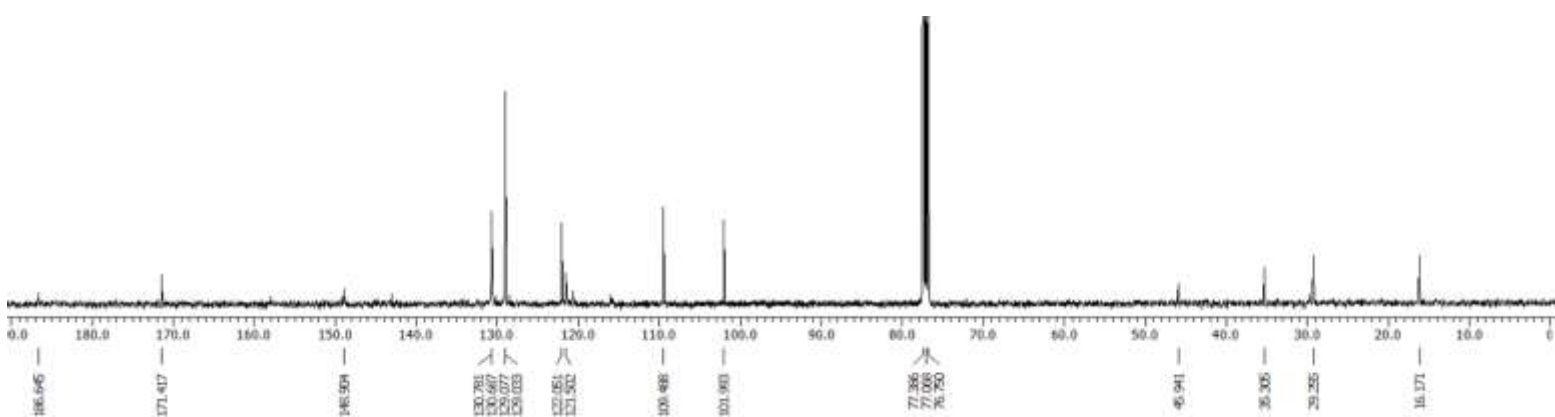



# HRMS spectrum of 2o

## Qualitative Compound Report

**Data File:** SMT-352.d      **Sample Name:** SMT-352  
**Sample Type:** Sample      **Position:** P1-C1  
**Instrument Name:** Instrument 1      **User Name:**  
**Acq Method:** MS Scan.m      **Acquired Time:** 09-11-2023 14:11:12  
**IRN Calibration Status:**      **DA Method:** Default.m  
**Comment:**

**Sample Group:**      **Info:**      **3**  
**Acquisition SW Version:** 6200 series TOF/6300 series  
 Q-TOF 8.05.01 (85125)

### Compound Table

| Compound Label      | RT    | Mass     | Abund | Formula      | Tgt Mass | Diff (ppm) | MPG Formula  | DB Formula   |
|---------------------|-------|----------|-------|--------------|----------|------------|--------------|--------------|
| Cpd 1: C20 H15 N O5 | 0.129 | 349.0951 | 96035 | C20 H15 N O5 | 349.095  | 0.22       | C20 H15 N O5 | C20 H15 N O5 |

| Compound Label      | m/z     | RT    | Algorithm       | Mass     |
|---------------------|---------|-------|-----------------|----------|
| Cpd 1: C20 H15 N O5 | 350.102 | 0.129 | Find By Formula | 349.0951 |

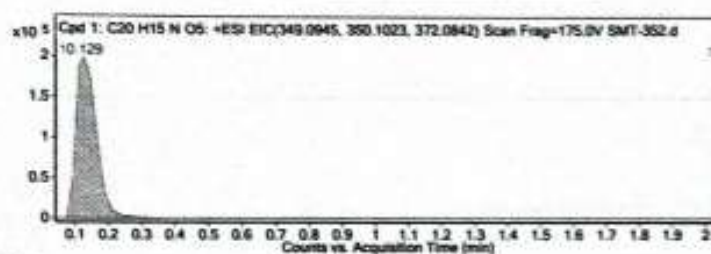

### MS Spectrum

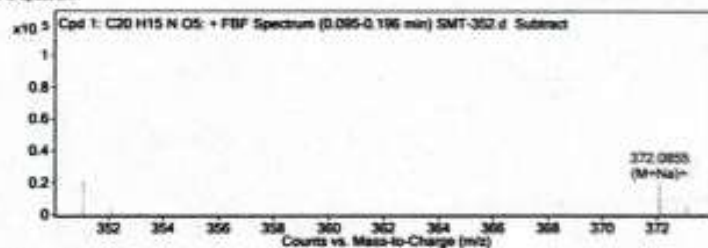

### MS Zoomed Spectrum

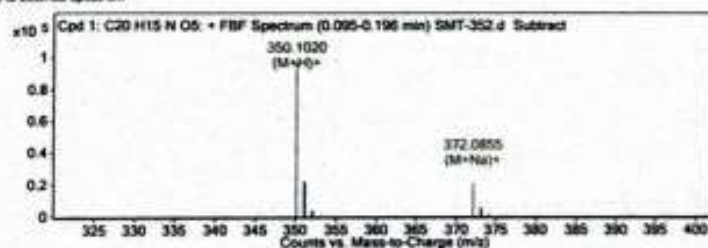

### MS Spectrum Peak List

| m/z      | x | Abund    | Formula     | Ion     |
|----------|---|----------|-------------|---------|
| 350.102  | 1 | 96035.33 | C20H16NO5   | (M+H)+  |
| 351.0953 | 1 | 20963.48 | C20H16NO5   | (M+H)+  |
| 352.1083 | 1 | 3873.8   | C20H16NO5   | (M+H)+  |
| 353.1065 | 1 | 713.54   | C20H16NO5   | (M+H)+  |
| 372.0855 | 1 | 20288.39 | C20H15NNaO5 | (M+Na)+ |
| 373.09   | 1 | 5335.91  | C20H15NNaO5 | (M+Na)+ |
| 374.0996 | 1 | 1122.35  | C20H15NNaO5 | (M+Na)+ |

--- End Of Report ---



<sup>13</sup>C NMR spectrum of 2p (400 MHz, CDCl<sub>3</sub>)

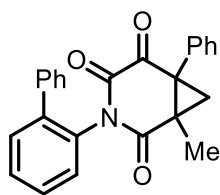

3-([1,1'-biphenyl]-2-yl)-1-methyl-6-phenyl-3-azabicyclo[4.1.0]heptane-2,4,5-trione

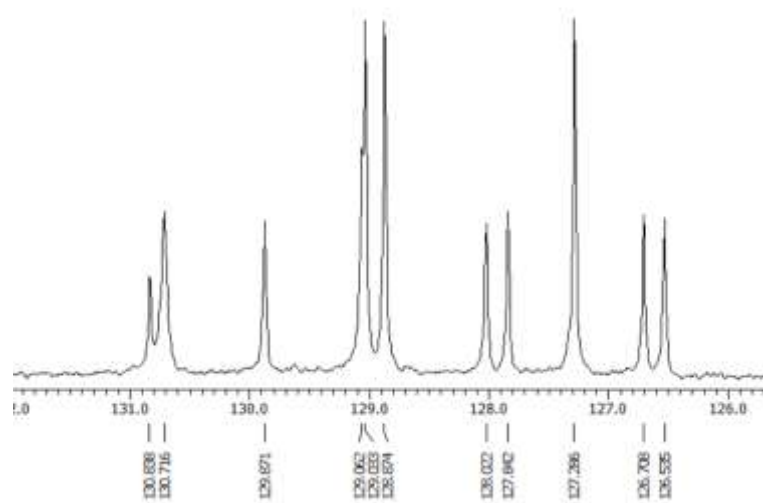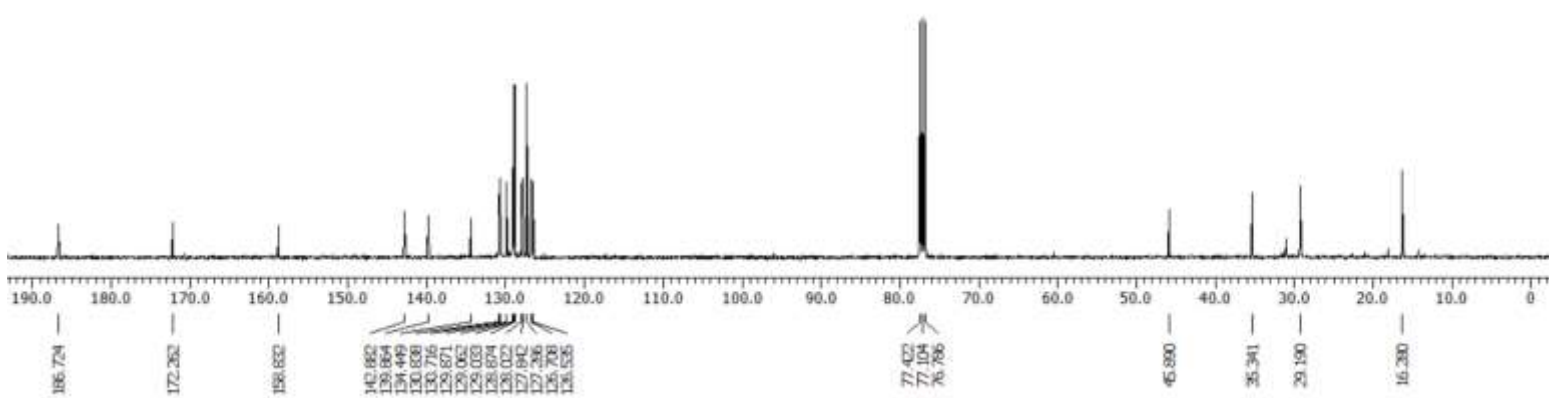

# HRMS spectrum of 2p

## Qualitative Compound Report

|                        |              |               |                     |
|------------------------|--------------|---------------|---------------------|
| Data File              | SMT-374.d    | Sample Name   | SMT-374             |
| Sample Type            | Sample       | Position      | F1-A1               |
| Instrument Name        | Instrument 1 | User Name     |                     |
| Acq Method             | MS Scan.m    | Acquired Time | 08-12-2023 12:07:18 |
| IRN Calibration Status |              | DA Method     | Default.m           |
| Comment                |              |               |                     |

|                |                             |   |
|----------------|-----------------------------|---|
| Sample Group   | Info.                       | 3 |
| Acquisition SW | 6200 series TOF/MS00 series |   |
| Version        | Q-TOF B.05.01 (85125)       |   |

### Compound Table

| Compound Label      | RT    | Mass     | Abund | Formula      | Tgt Mass | Diff (ppm) | MFG Formula  | DB Formula   |
|---------------------|-------|----------|-------|--------------|----------|------------|--------------|--------------|
| Cpd 1: C25 H19 N O3 | 0.126 | 381.1376 | 12049 | C25 H19 N O3 | 381.1365 | 2.93       | C25 H19 N O3 | C25 H19 N O3 |

| Compound Label      | m/z      | RT    | Algorithm       | Mass     |
|---------------------|----------|-------|-----------------|----------|
| Cpd 1: C25 H19 N O3 | 404.1269 | 0.126 | Find By Formula | 381.1376 |

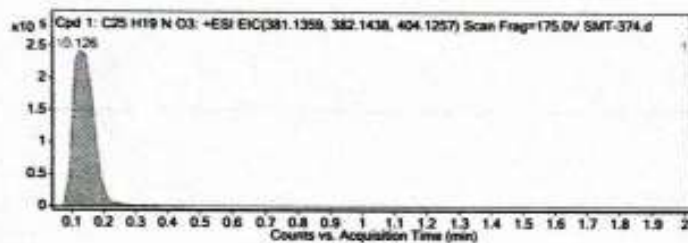

### MS Spectrum

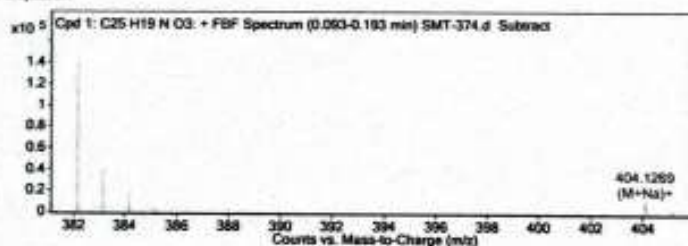

### MS Zoomed Spectrum

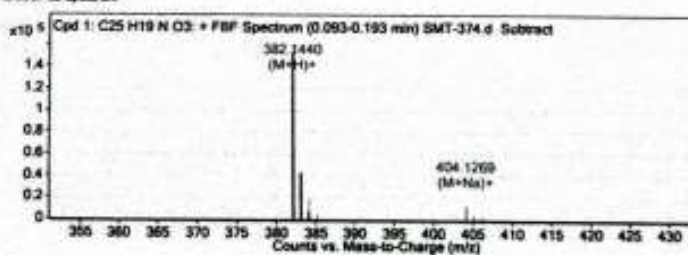

### MS Spectrum Peak List

| m/z      | z | Abund     | Formula   | Ion                 |
|----------|---|-----------|-----------|---------------------|
| 381.1446 | 1 | 341.26    | C25H19NO3 | M <sup>+</sup>      |
| 382.1441 | 1 | 141119.53 | C25H20NO3 | (M+H) <sup>+</sup>  |
| 383.1473 | 1 | 39744.75  | C25H20NO3 | (M+H) <sup>+</sup>  |
| 384.1567 | 1 | 18175.52  | C25H20NO3 | (M+H) <sup>+</sup>  |
| 385.1619 | 1 | 4514.32   | C25H20NO3 | (M+H) <sup>+</sup>  |
| 404.1269 | 1 | 12049.41  | C25H19NO3 | (M+Na) <sup>+</sup> |
| 405.1308 | 1 | 3778.33   | C25H19NO3 | (M+Na) <sup>+</sup> |
| 406.1425 | 1 | 1127.72   | C25H19NO3 | (M+Na) <sup>+</sup> |

--- End Of Report ---

<sup>1</sup>H NMR spectrum of 2q (400 MHz, CDCl<sub>3</sub>)

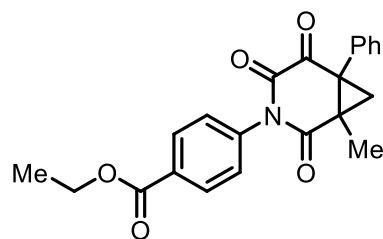

ethyl 4-(1-methyl-2,4,5-trioxo-6-phenyl-3-azabicyclo[4.1.0]heptan-3-yl)benzoate

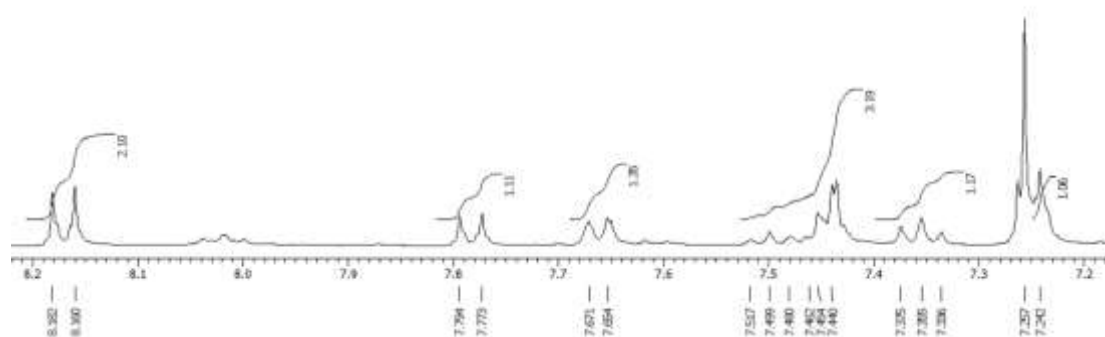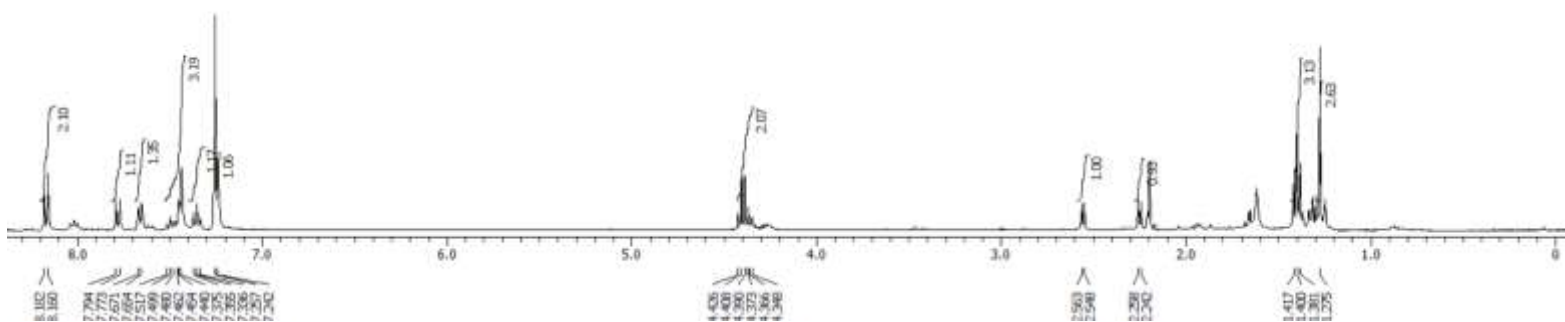

<sup>13</sup>C NMR spectrum of 2q (100 MHz, CDCl<sub>3</sub>)

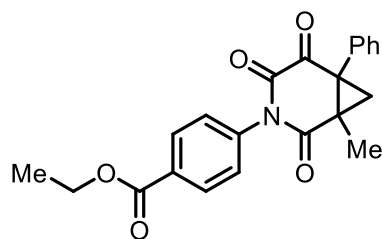

ethyl 4-(1-methyl-2,4,5-trioxo-6-phenyl-3-azabicyclo[4.1.0]heptan-3-yl)benzoate

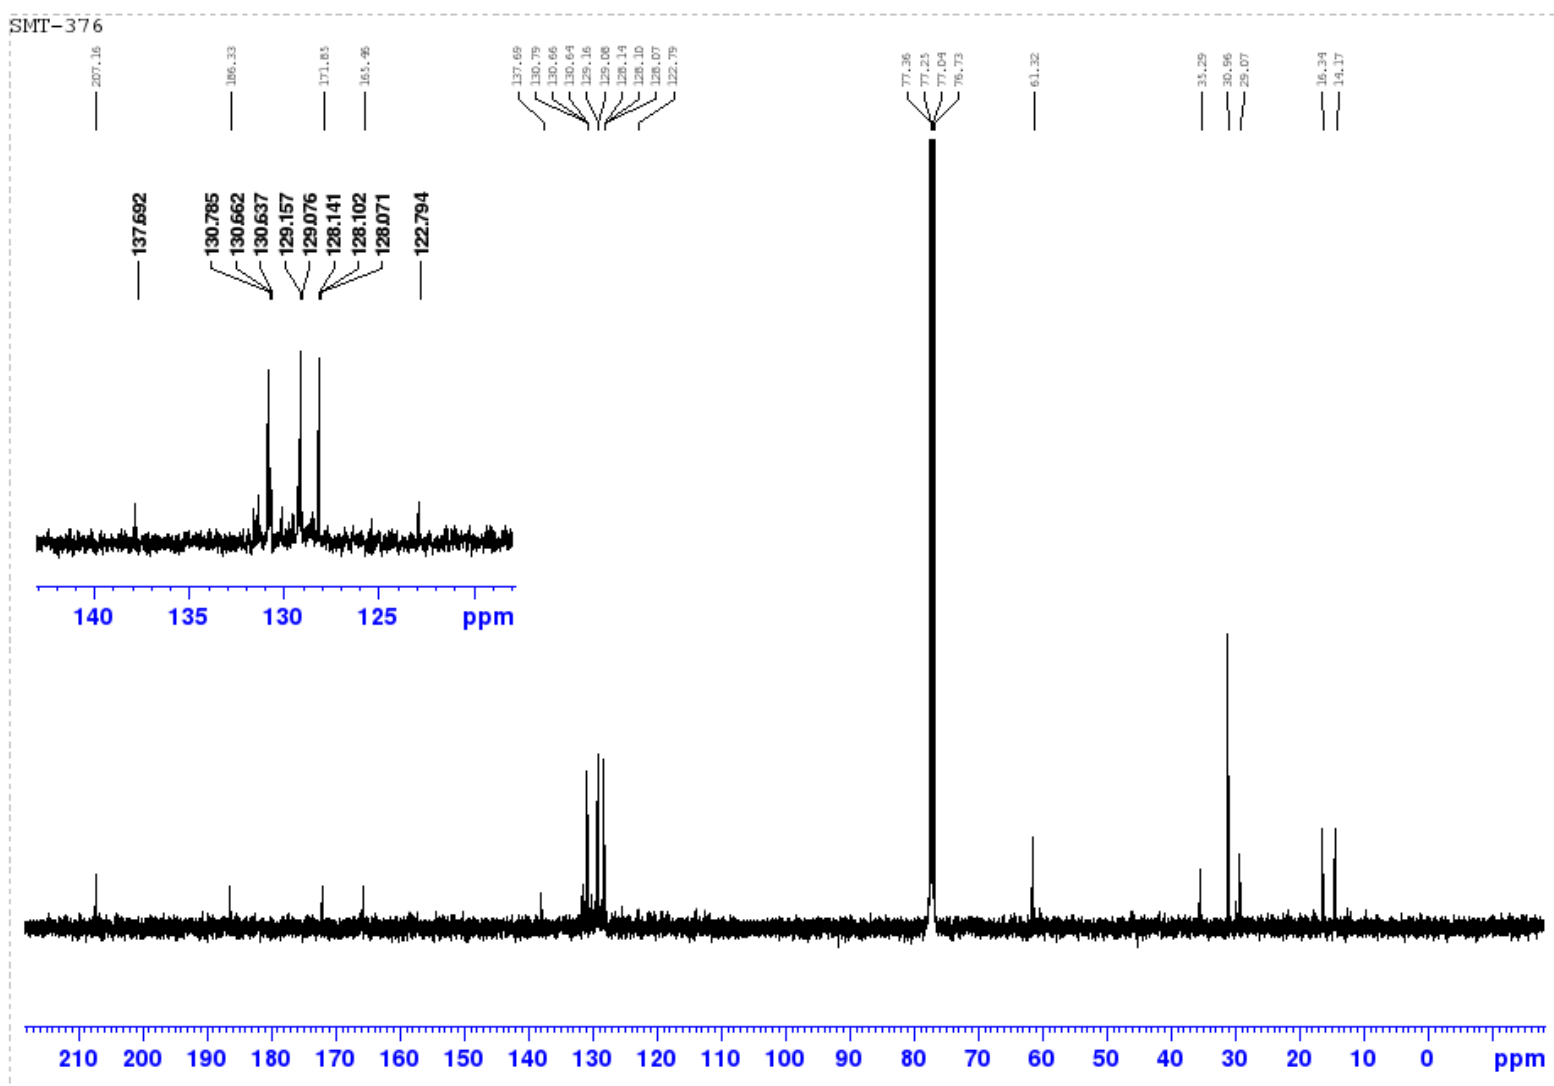

# HRMS spectrum of 2q

|                    |                 |                               |         |                        |                                 |
|--------------------|-----------------|-------------------------------|---------|------------------------|---------------------------------|
| <b>Sample Name</b> | SMT 362         | <b>Position</b>               | P1-A2   | <b>Instrument Name</b> | BIOQTOF                         |
| <b>User Name</b>   | SYSTEM (SYSTEM) | <b>Inj Vol</b>                | 1       | <b>InjPosition</b>     |                                 |
| <b>Sample Type</b> | Sample          | <b>IRM Calibration Status</b> | Success | <b>Data Filename</b>   | SMT 362.d                       |
| <b>ACQ Method</b>  | Pos_100ACN.m    | <b>Comment</b>                |         | <b>Acquired Time</b>   | 27-04-2024 11:44:42 (UTC+05:30) |

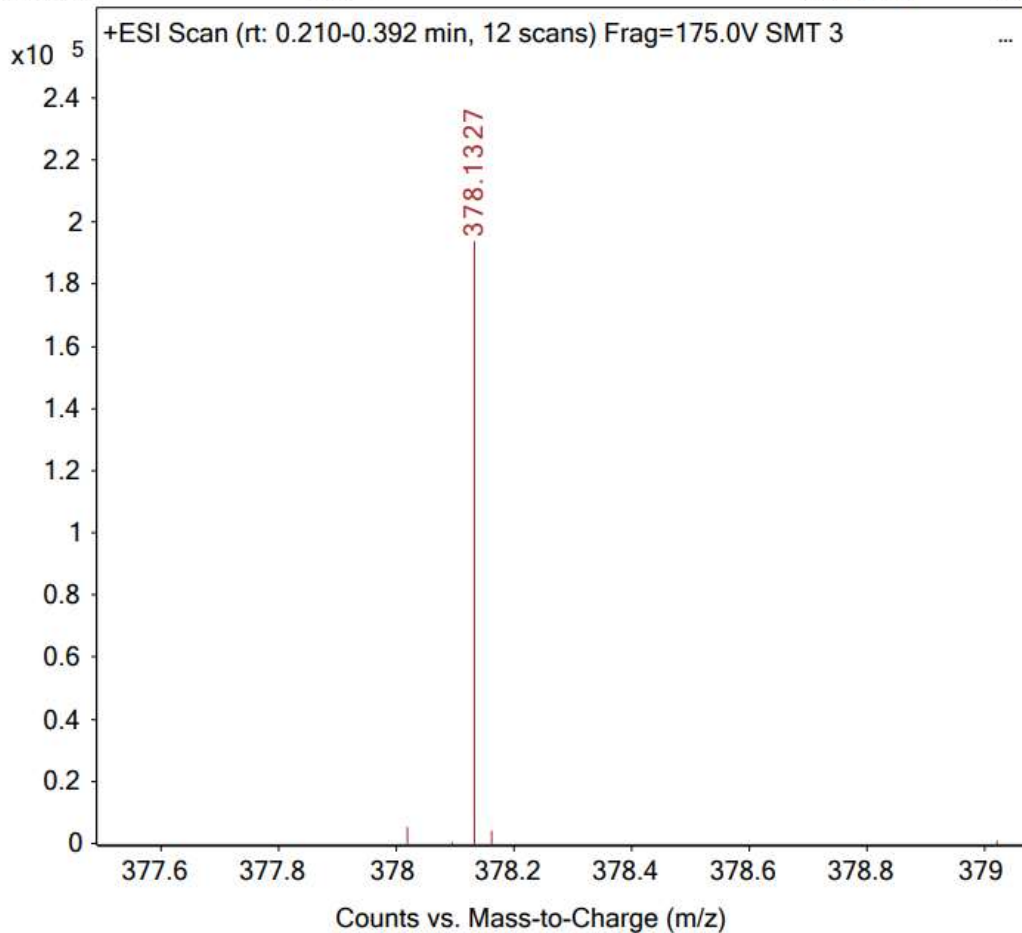

<sup>1</sup>H NMR spectrum of 2r (400 MHz, CDCl<sub>3</sub>)

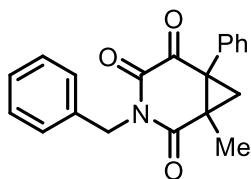

3-benzyl-1-methyl-6-phenyl-3-azabicyclo[4.1.0]heptane-2,4,5-trione

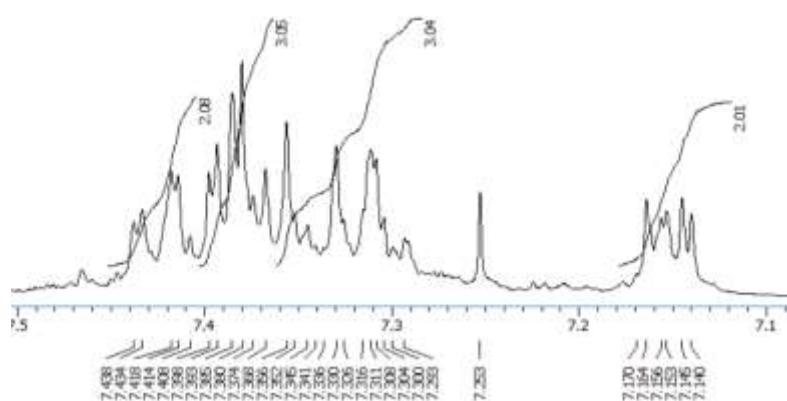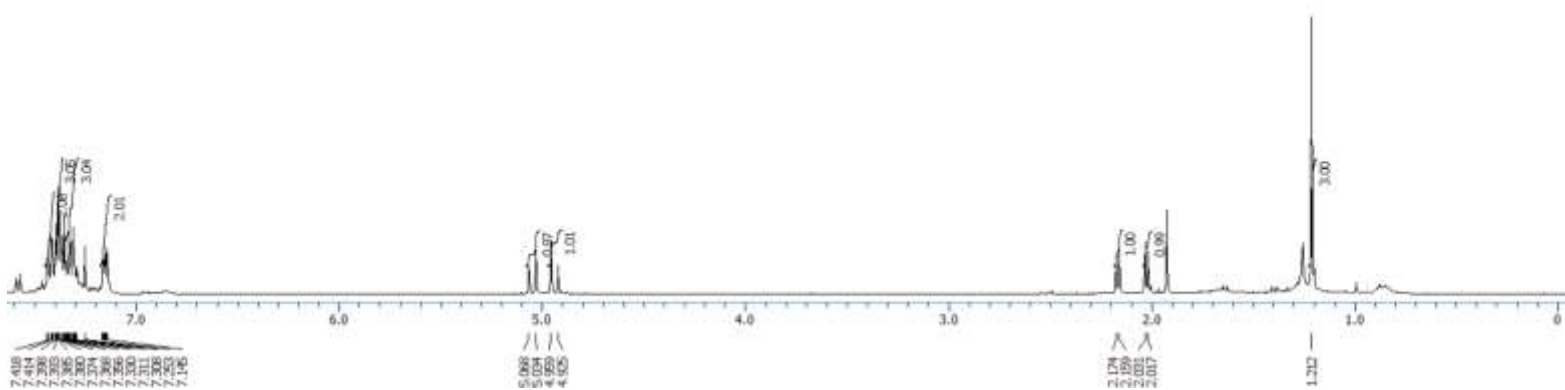



<sup>13</sup>C NMR spectrum of 2r (100 MHz, CDCl<sub>3</sub>)

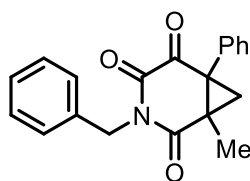

3-benzyl-1-methyl-6-phenyl-3-azabicyclo[4.1.0]heptane-2,4,5-trione

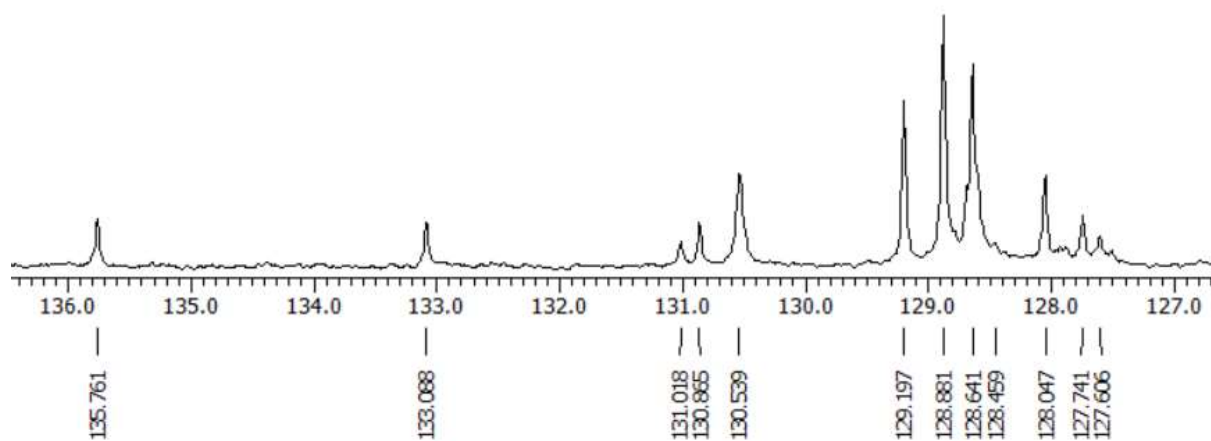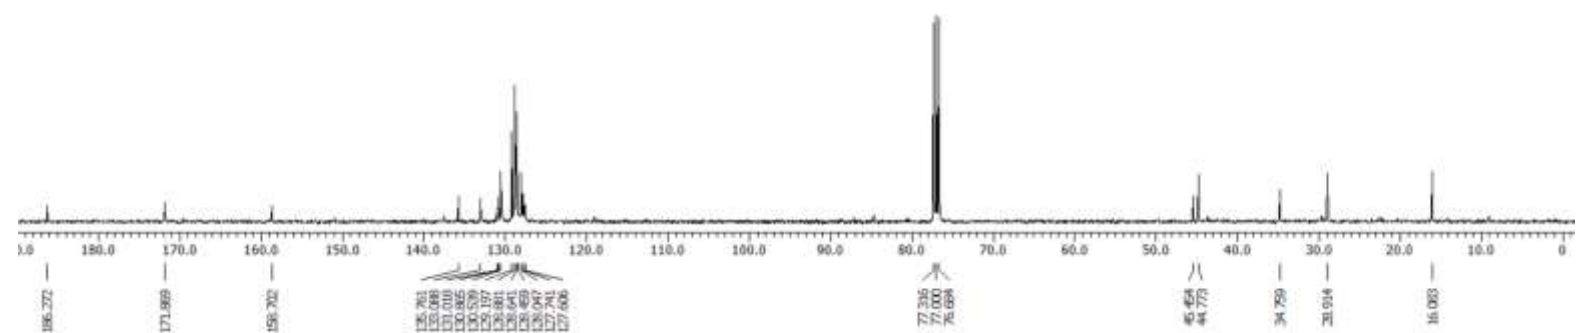

# HRMS spectrum of 2r

## Qualitative Compound Report

|                        |              |               |                     |
|------------------------|--------------|---------------|---------------------|
| Data File              | SMT-326.d    | Sample Name   | SMT-326             |
| Sample Type            | Sample       | Position      | P1-B6               |
| Instrument Name        | Instrument 1 | User Name     |                     |
| Acq Method             | MS Scan.m    | Acquired Time | 16-09-2023 13:15:26 |
| IRM Calibration Status | Success      | DA Method     | Default.m           |
| Comment                |              |               |                     |

|                |                              |   |
|----------------|------------------------------|---|
| Sample Group   | Info.                        | 3 |
| Acquisition SW | 6200 series TOF/ESI00 series |   |
| Version        | Q-TOF 8.05.01 (85125)        |   |

| Compound Label      | RT    | Mass     | Abund | Formula      | Tgt Mass | Diff (ppm) | MFG Formula  | DB Formula   |
|---------------------|-------|----------|-------|--------------|----------|------------|--------------|--------------|
| Cpd 1: C20 H17 N O3 | 0.133 | 319.1211 | 36436 | C20 H17 N O3 | 319.1208 | 0.72       | C20 H17 N O3 | C20 H17 N O3 |

| Compound Label      | m/z      | RT    | Algorithm       | Mass     |
|---------------------|----------|-------|-----------------|----------|
| Cpd 1: C20 H17 N O3 | 320.1281 | 0.133 | Find By Formula | 319.1211 |

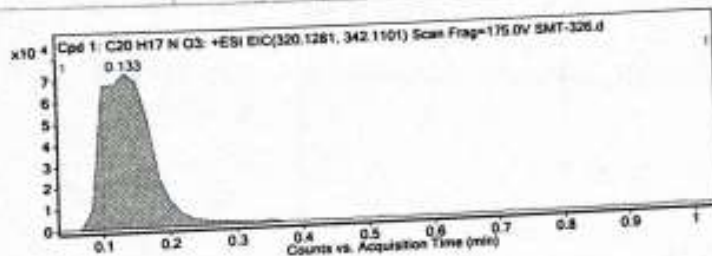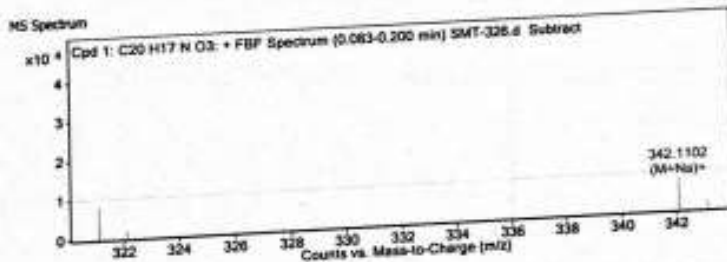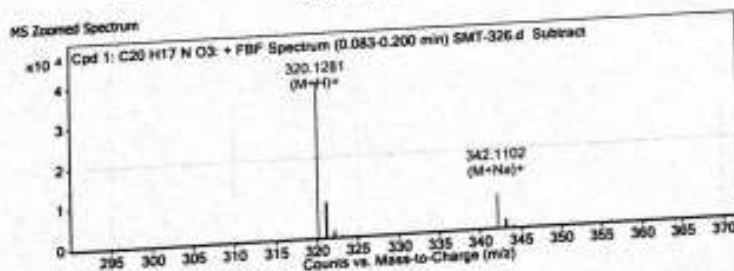

| m/z      | z | Abund   | Formula     | Ion     |
|----------|---|---------|-------------|---------|
| 320.1281 | 1 | 36436.3 | C20H18NO3   | (M+H)+  |
| 321.1316 | 1 | 8497.19 | C20H18NO3   | (M+H)+  |
| 322.1378 | 1 | 1755.03 | C20H18NO3   | (M+H)+  |
| 323.1414 | 1 | 448.67  | C20H18NO3   | (M+H)+  |
| 342.1102 | 1 | 8318.78 | C20H17NNaO3 | (M+Na)+ |
| 343.1146 | 1 | 2138.4  | C20H17NNaO3 | (M+Na)+ |
| 344.114  | 1 | 301.63  | C20H17NNaO3 | (M+Na)+ |

--- End Of Report ---

**<sup>1</sup>H NMR spectrum of 2s (400 MHz, CDCl<sub>3</sub>)**

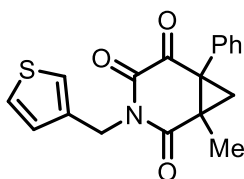

1-methyl-6-phenyl-3-(thiophen-3-ylmethyl)-3-azabicyclo[4.1.0]heptane-2,4,5-trione

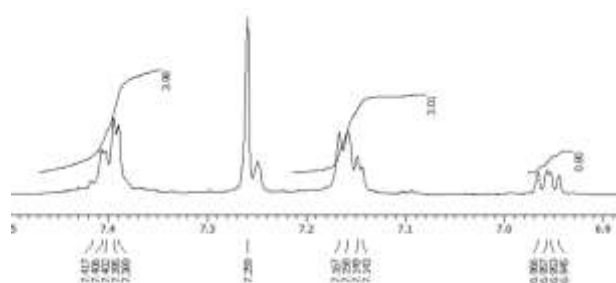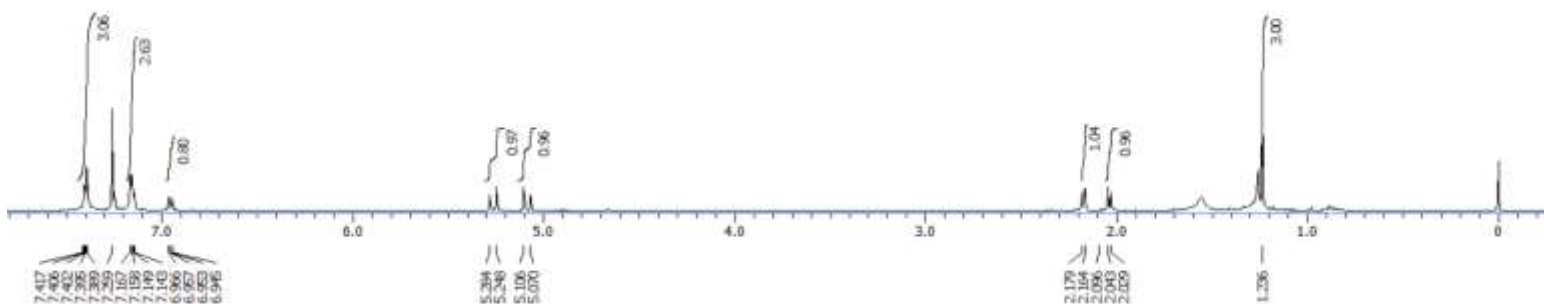

<sup>13</sup>C NMR spectrum of 2s (100 MHz, CDCl<sub>3</sub>)

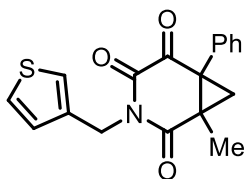

1-methyl-6-phenyl-3-(thiophen-3-ylmethyl)-3-azabicyclo[4.1.0]heptane-2,4,5-trione

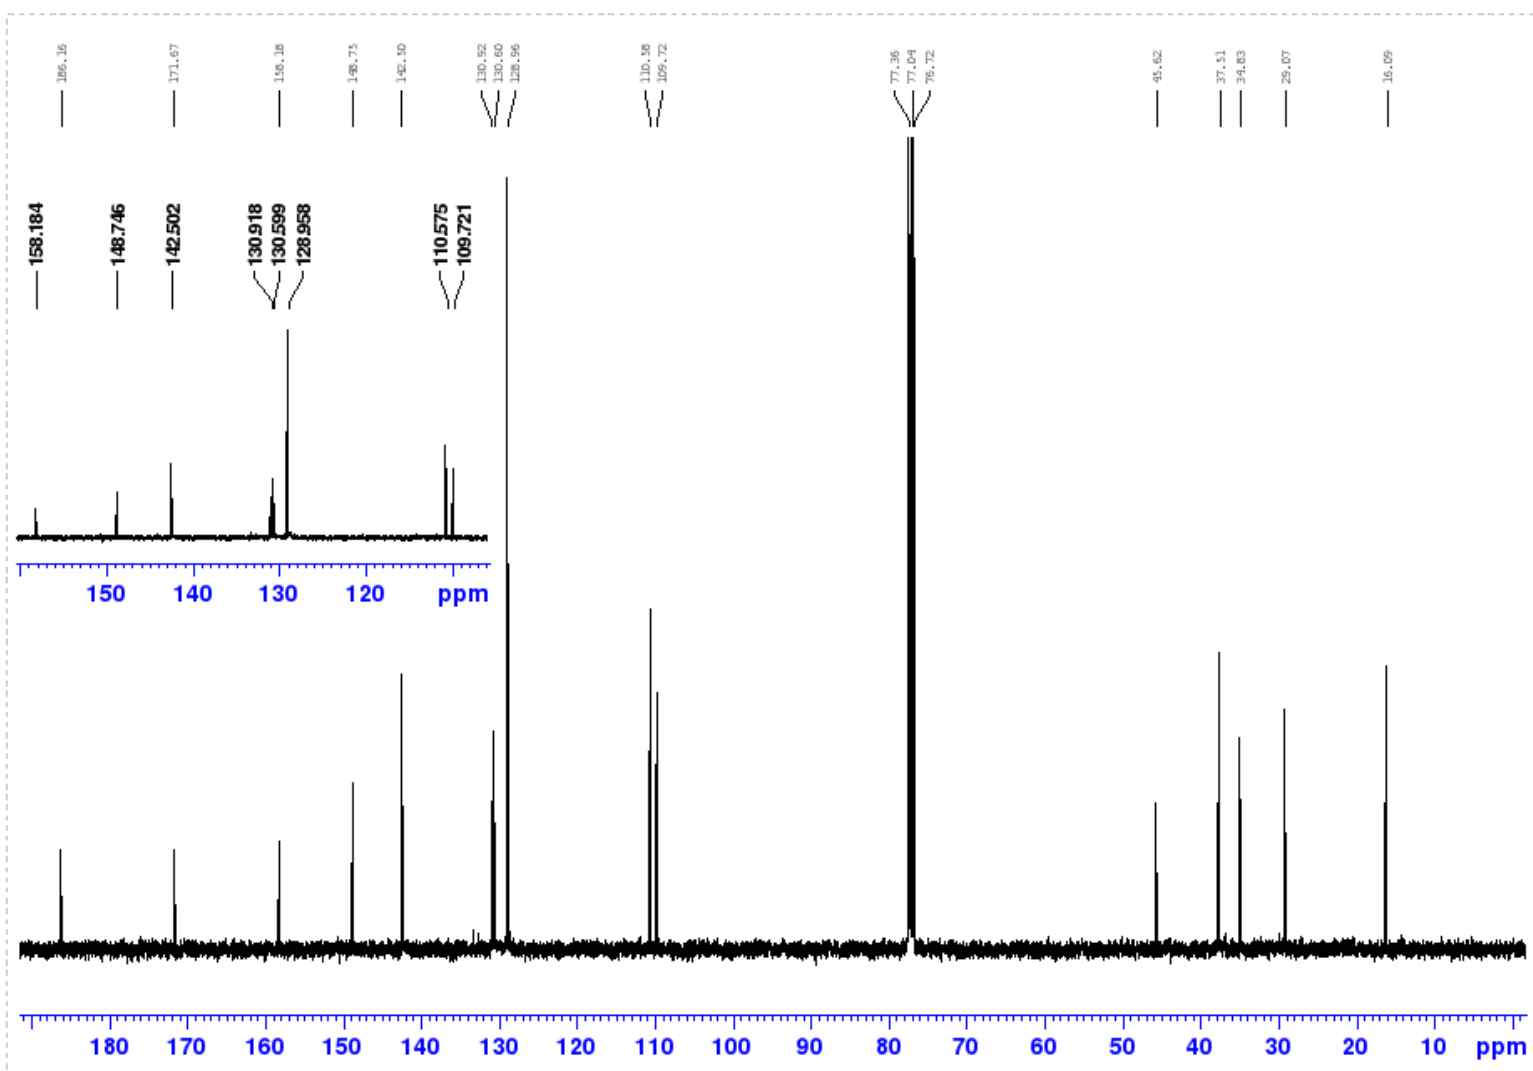

# HRMS spectrum of 2s

## Qualitative Compound Report

|                        |              |               |                     |
|------------------------|--------------|---------------|---------------------|
| Data File              | SMT-251.d    | Sample Name   | SMT-251             |
| Sample Type            | Sample       | Position      | P1-B6               |
| Instrument Name        | Instrument 1 | User Name     |                     |
| Acq Method             | MS Scan.m    | Acquired Time | 22-05-2023 14:52:49 |
| IRM Calibration Status |              | DA Method     | Default.m           |
| Comment                |              |               |                     |

|                |                             |   |
|----------------|-----------------------------|---|
| Sample Group   | Info                        | 3 |
| Acquisition SW | 6200 series TOF/6500 series |   |
| Version        | Q-TOF B.05.01 (95125)       |   |

### Compound Table

| Compound Label        | RT    | Mass     | Abund | Formula        | Tgt Mass | Diff (ppm) | MPG Formula    | DB Formula     |
|-----------------------|-------|----------|-------|----------------|----------|------------|----------------|----------------|
| Cpd 1: C18 H15 N O3 S | 0.128 | 325.0778 | 21176 | C18 H15 N O3 S | 325.0773 | 1.61       | C18 H15 N O3 S | C18 H15 N O3 S |

| Compound Label        | m/z      | RT    | Algorithm       | Mass     |
|-----------------------|----------|-------|-----------------|----------|
| Cpd 1: C18 H15 N O3 S | 326.0851 | 0.128 | Find By Formula | 325.0778 |

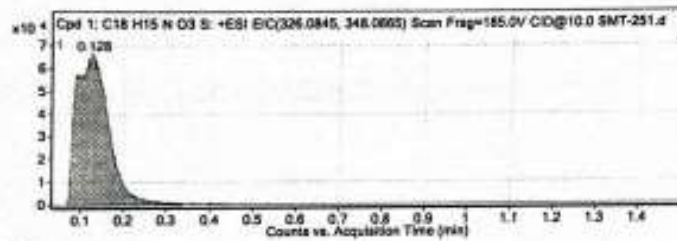

### MS Spectrum

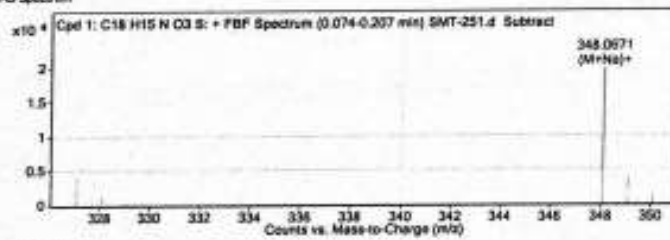

### MS Zoomed Spectrum

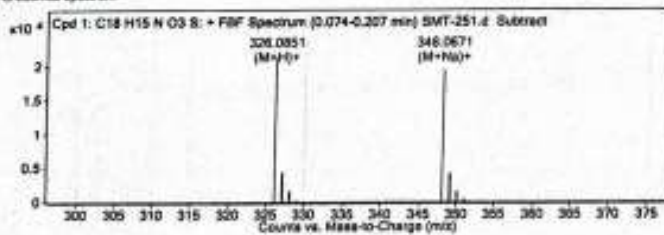

### MS Spectrum Peak List

| m/z      | z | Abund    | Formula      | Ion     |
|----------|---|----------|--------------|---------|
| 326.0851 | 1 | 21175.79 | C18H16NO3S   | (M+H)+  |
| 327.0879 | 1 | 4072.83  | C18H16NO3S   | (M+H)+  |
| 328.0846 | 1 | 1352.05  | C18H16NO3S   | (M+H)+  |
| 329.0864 | 1 | 311.24   | C18H16NO3S   | (M+H)+  |
| 348.0671 | 1 | 18646.03 | C18H15NNaO3S | (M+Na)+ |
| 349.0699 | 1 | 3813.85  | C18H15NNaO3S | (M+Na)+ |
| 350.0673 | 1 | 1202.38  | C18H15NNaO3S | (M+Na)+ |
| 351.0691 | 1 | 186.7    | C18H15NNaO3S | (M+Na)+ |

--- End Of Report ---



**<sup>13</sup>C NMR spectrum of 2t (100 MHz, CDCl<sub>3</sub>)**

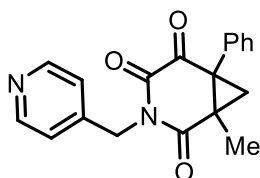

1-methyl-6-phenyl-3-(pyridin-4-ylmethyl)-3-azabicyclo[4.1.0]heptane-2,4,5-trione

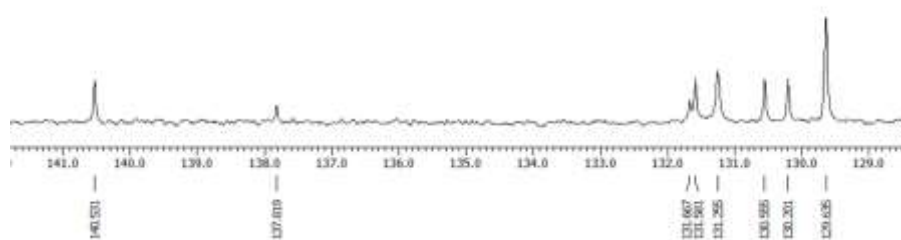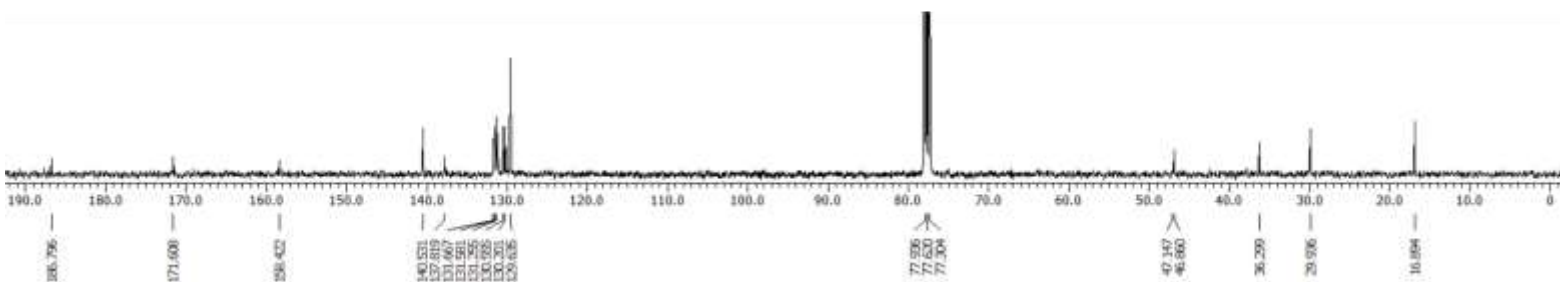

**HRMS spectrum of 2t**



## Qualitative Compound Report

|                        |              |               |                     |
|------------------------|--------------|---------------|---------------------|
| Data File              | SMT-266.d    | Sample Name   | SMT-266             |
| Sample Type            | Simple       | Position      | P1-B2               |
| Instrument Name        | Instrument 1 | User Name     |                     |
| Acq Method             | MS Scan.m    | Acquired Time | 14-08-2023 13:10:54 |
| IRM Calibration Status |              | DA Method     | Default.m           |
| Comment                |              |               |                     |

|                |                             |       |   |
|----------------|-----------------------------|-------|---|
| Sample Group   |                             | Info. | 3 |
| Acquisition SW | 6700 series TQF/6500 series |       |   |
| Version        | Q-TQF 8.05-01 (85125)       |       |   |

### Compound Table

| Compound Label       | RT    | Mass     | Abund  | Formula       | Tgt Mass | Diff (ppm) | HF Formula    | DB Formula    |
|----------------------|-------|----------|--------|---------------|----------|------------|---------------|---------------|
| Cpd 1: C19 H16 N2 O3 | 0.127 | 320.1154 | 101264 | C19 H16 N2 O3 | 320.1161 | -2.09      | C19 H16 N2 O3 | C19 H16 N2 O3 |

| Compound Label       | m/z      | RT    | Algorithm       | Mass     |
|----------------------|----------|-------|-----------------|----------|
| Cpd 1: C19 H16 N2 O3 | 321.1227 | 0.127 | Find By Formula | 320.1154 |

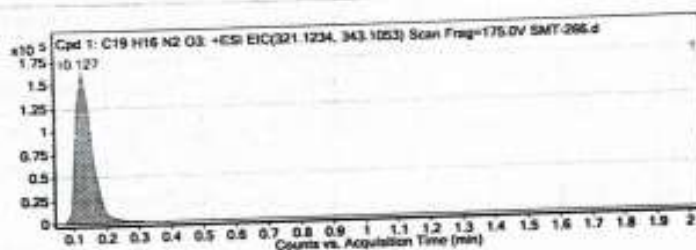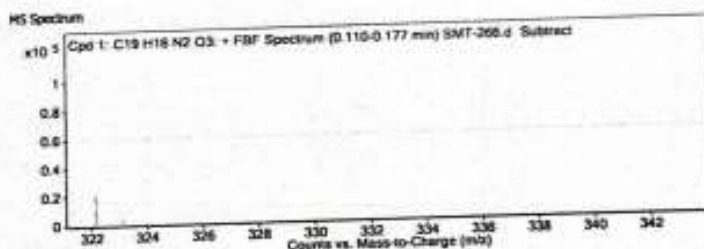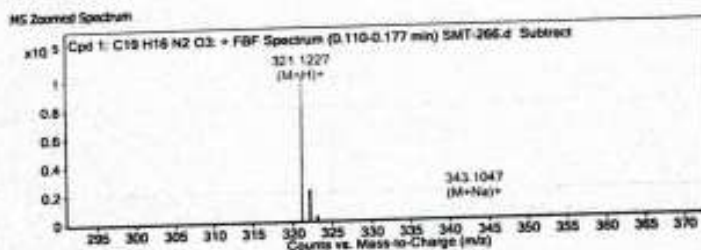

### MS Spectrum Peak List

| m/z      | x | Abund     | Formula      | Ion     |
|----------|---|-----------|--------------|---------|
| 321.1227 | 1 | 101264.27 | C19H17N2O3   | (M+H)+  |
| 322.1261 | 1 | 20900.87  | C19H17N2O3   | (M+H)+  |
| 323.1299 | 1 | 3661.75   | C19H17N2O3   | (M+H)+  |
| 324.1285 | 1 | 429.41    | C19H17N2O3   | (M+H)+  |
| 343.1047 | 1 | 869.21    | C19H16N2NaO3 | (M+Na)+ |
| 344.0998 | 1 | 113.04    | C19H16N2NaO3 | (M+Na)+ |

--- End Of Report ---

<sup>1</sup>H NMR spectrum of 2u (400 MHz, CDCl<sub>3</sub>)

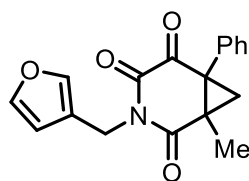

3-(furan-3-ylmethyl)-1-methyl-6-phenyl-3-azabicyclo[4.1.0]heptane-2,4,5-trione

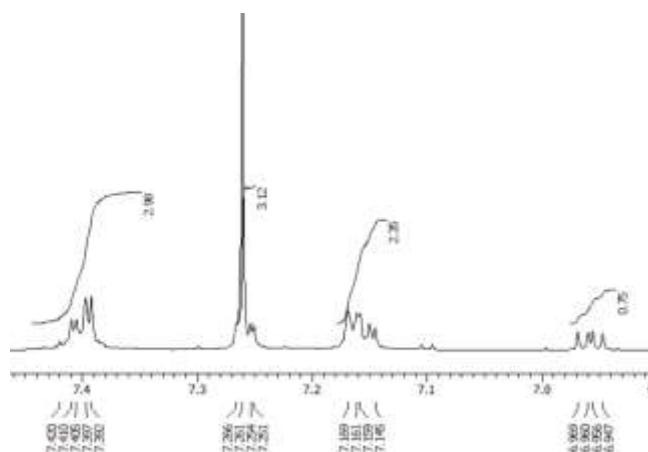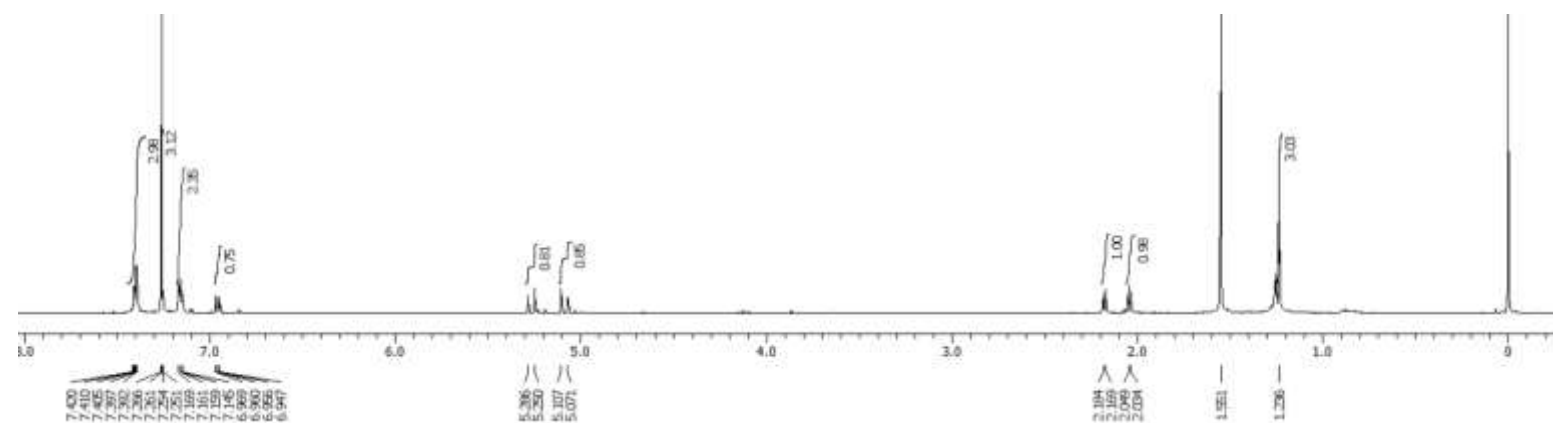

<sup>13</sup>C NMR spectrum of 2u (100 MHz, CDCl<sub>3</sub>)

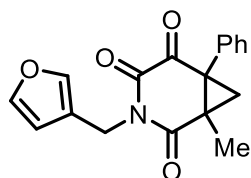

3-(furan-3-ylmethyl)-1-methyl-6-phenyl-3-azabicyclo[4.1.0]heptane-2,4,5-trione

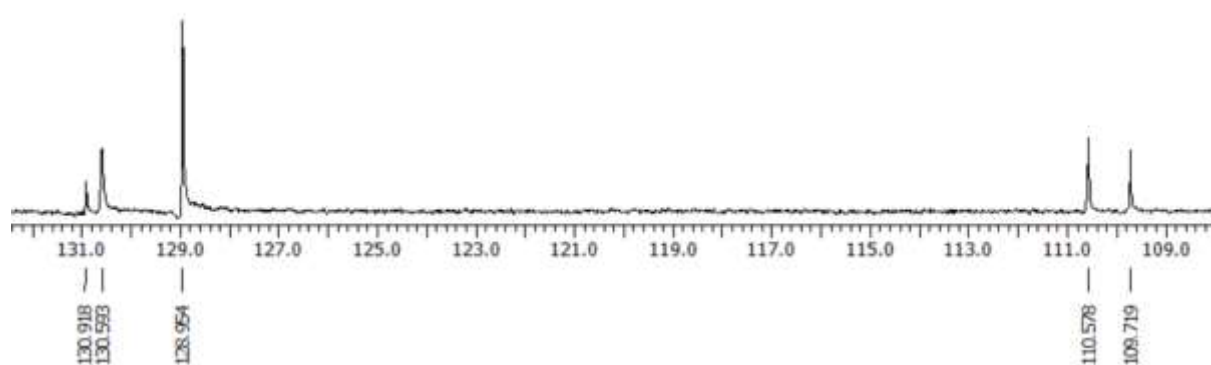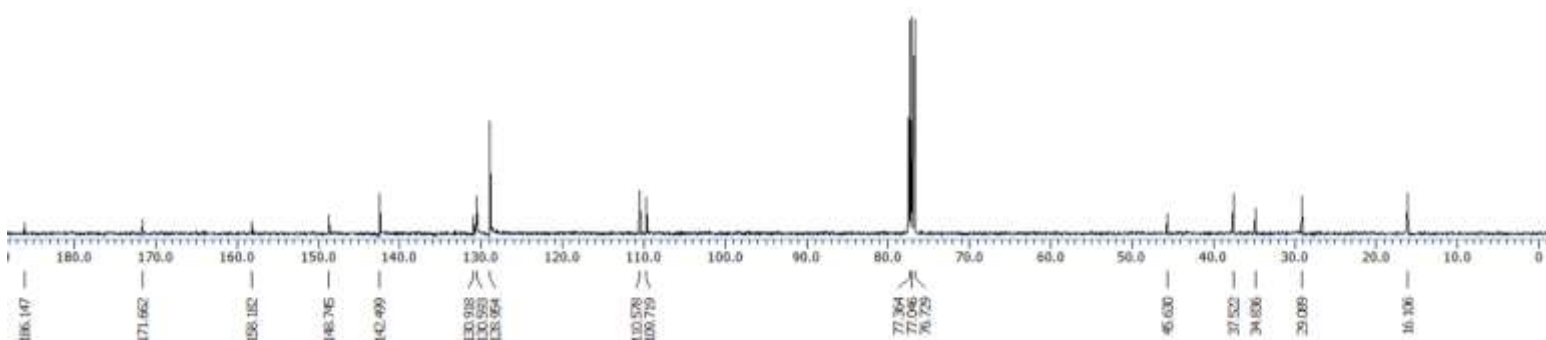

HRMS spectrum of 2u

## Qualitative Compound Report

|                        |              |               |                     |
|------------------------|--------------|---------------|---------------------|
| Data File              | ST-HP.d      | Sample Name   | ST-HP               |
| Sample Type            | Sample       | Position      | F1-C1               |
| Instrument Name        | Instrument 1 | User Name     |                     |
| Acq Method             | MS Scan.m    | Acquired Time | 11-05-2024 12:51:32 |
| IRM Calibration Status | Success      | DA Method     | Default.m           |
| Comment                |              |               |                     |

|                |                             |       |   |
|----------------|-----------------------------|-------|---|
| Sample Group   |                             | Info. | 3 |
| Acquisition SW | 6200 series TDF/6500 series |       |   |
| Version        | Q-TDF 8.05.01 (R1175)       |       |   |

### Compound Table

| Compound Label      | RT    | Mass     | Abund | Formula      | Tgt Mass | Diff (ppm) | MFG Formula  | DB Formula   |
|---------------------|-------|----------|-------|--------------|----------|------------|--------------|--------------|
| Cpd 1: C18 H15 N O4 | 0.826 | 309.1015 | 11735 | C18 H15 N O4 | 309.1001 | 4.37       | C18 H15 N O4 | C18 H15 N O4 |

| Compound Label      | m/z     | RT    | Algorithm       | Mass     |
|---------------------|---------|-------|-----------------|----------|
| Cpd 1: C18 H15 N O4 | 310.108 | 0.826 | Find By Formula | 309.1015 |

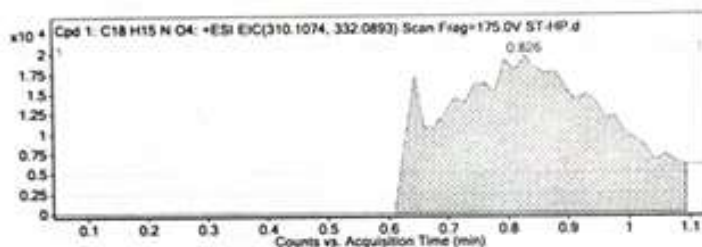

### MS Spectrum

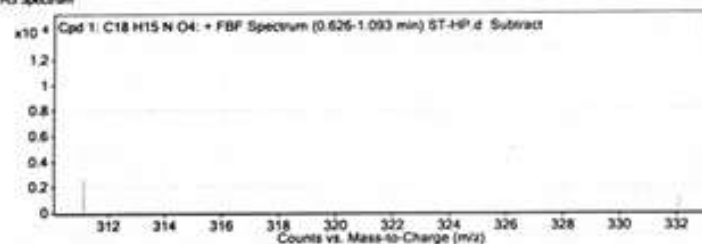

### MS Zoomed Spectrum

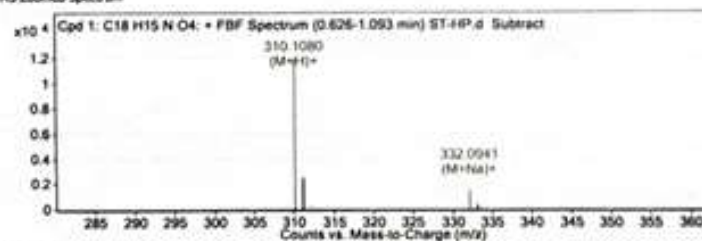

### MS Spectrum Peak List

| m/z      | # | Abund    | Formula     | Ion     |
|----------|---|----------|-------------|---------|
| 310.108  | 1 | 11734.58 | C18H16NO4   | (M+H)+  |
| 311.1121 | 1 | 2620.15  | C18H16NO4   | (M+H)+  |
| 332.0941 | 1 | 1336.19  | C18H15NNaO4 | (M+Na)+ |
| 333.1021 | 1 | 495.89   | C18H15NNaO4 | (M+Na)+ |

— End Of Report —

<sup>1</sup>H NMR spectrum of 2v (400 MHz, CDCl<sub>3</sub>)

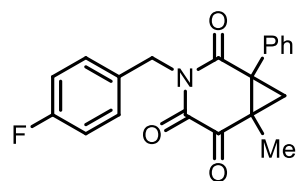

3-(4-fluorobenzyl)-6-methyl-1-phenyl-3-azabicyclo[4.1.0]heptane-2,4,5-trione

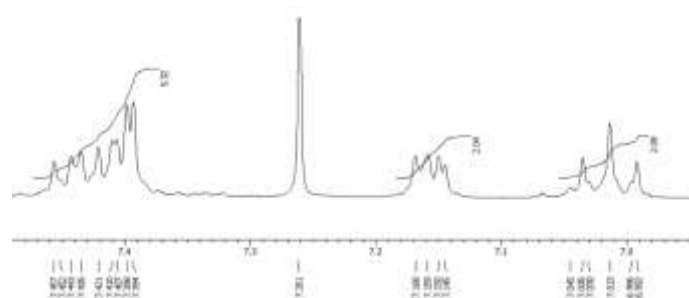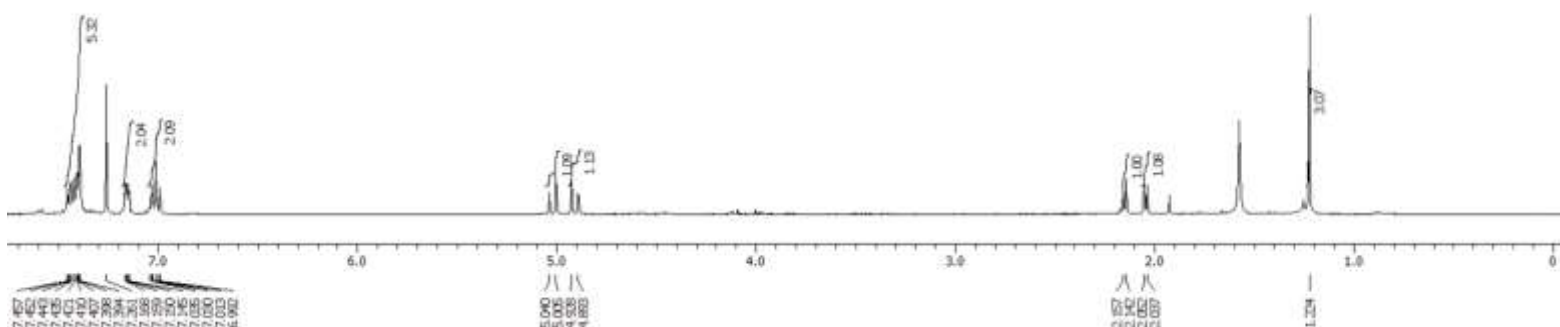

<sup>13</sup>C NMR spectrum of 2v (100 MHz, CDCl<sub>3</sub>)

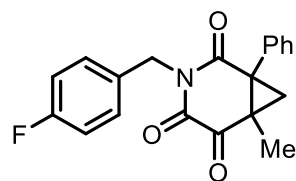

3-(4-fluorobenzyl)-6-methyl-1-phenyl-3-azabicyclo[4.1.0]heptane-2,4,5-trione

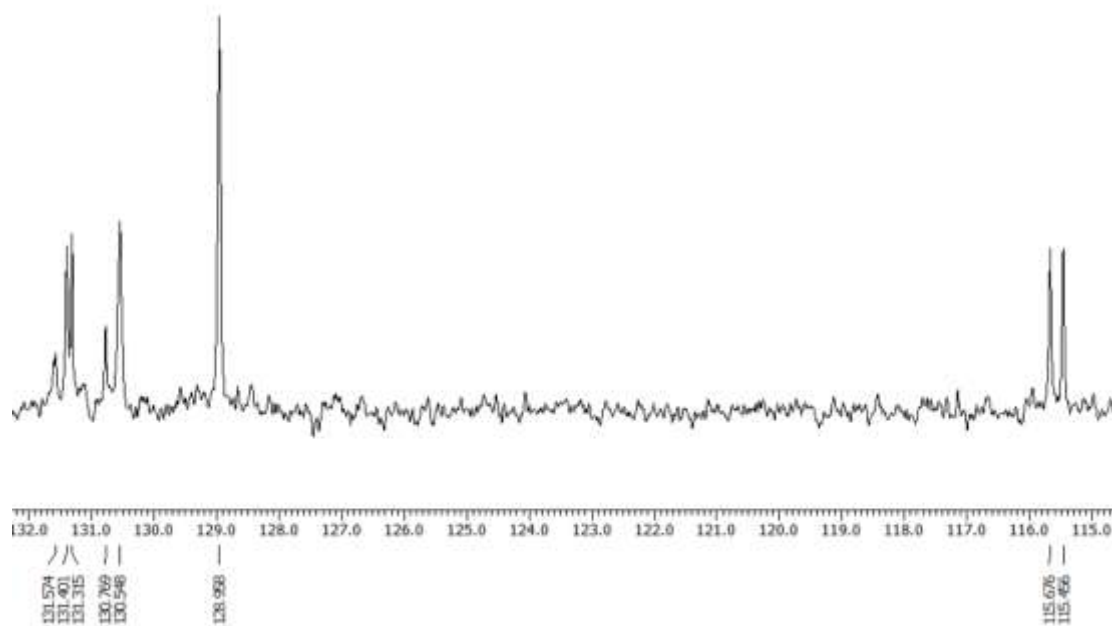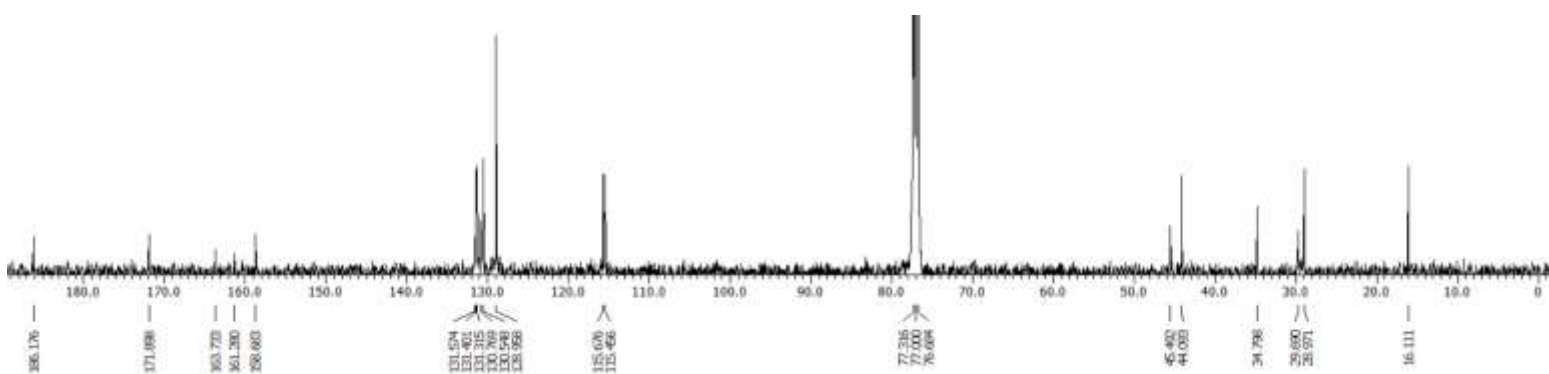

<sup>19</sup>F NMR spectrum of 2v (376 MHz, CDCl<sub>3</sub>)

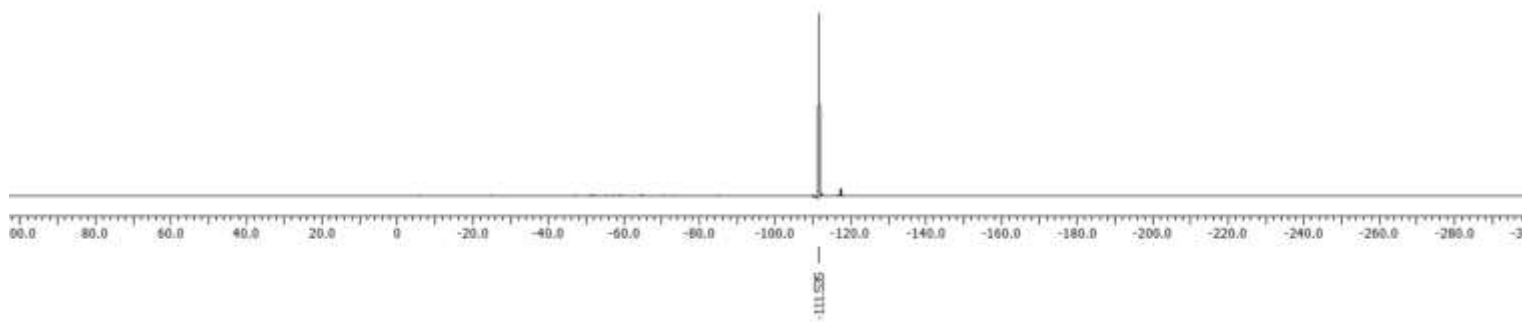

**HRMS spectrum of 2v**

S 183

## Qualitative Compound Report

|                        |              |               |                     |
|------------------------|--------------|---------------|---------------------|
| Data File              | SMT-336.d    | Sample Name   | SMT-336             |
| Sample Type            | Sample       | Position      | F1-A2               |
| Instrument Name        | Instrument 1 | User Name     |                     |
| Acq Method             | MS Scan.m    | Acquired Time | 09-10-2023 13:07:50 |
| IRM Calibration Status | Success      | DA Method     | Default.m           |
| Comment                |              |               |                     |

|                |                            |   |  |
|----------------|----------------------------|---|--|
| Sample Group   | Info.                      | 3 |  |
| Acquisition SW | 6300 series TOF/ESI series |   |  |
| Version        | Q-TOF 8.05.01 (95125)      |   |  |

### Compound Table

| Compound Label        | RT    | Mass     | Abund | Formula        | Tgt Mass | Diff (ppm) | MFG Formula    | DB Formula     |
|-----------------------|-------|----------|-------|----------------|----------|------------|----------------|----------------|
| Cpd 1: C20 H16 F N O3 | 0.136 | 337.1103 | 13000 | C20 H16 F N O3 | 337.1114 | -3.24      | C20 H16 F N O3 | C20 H16 F N O3 |

| Compound Label        | m/z      | RT    | Algorithm       | Mass     |
|-----------------------|----------|-------|-----------------|----------|
| Cpd 1: C20 H16 F N O3 | 360.1016 | 0.136 | Find By Formula | 337.1103 |

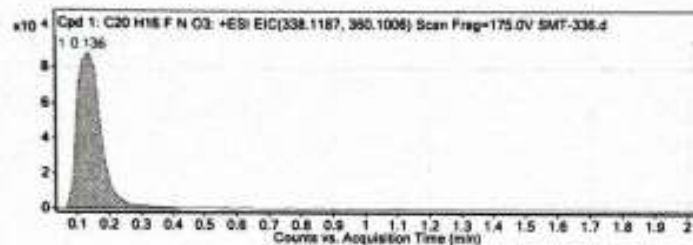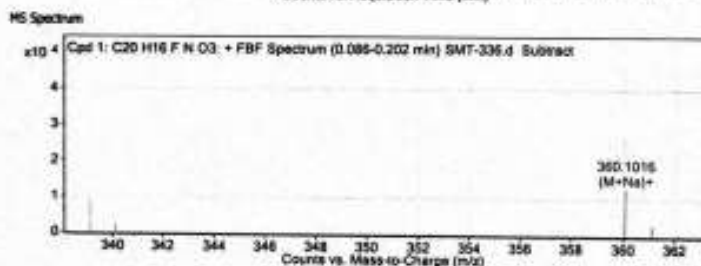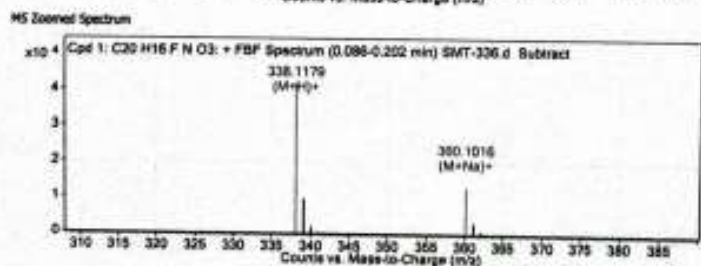

**MS Spectrum Peak List**

| m/z      | z | Abund    | Formula     | Ion     |
|----------|---|----------|-------------|---------|
| 338.1179 | 1 | 40890.25 | C20H17FNO3  | (M+H)+  |
| 339.1211 | 1 | 9365.87  | C20H17FNO3  | (M+H)+  |
| 340.1045 | 1 | 2473.36  | C20H17FNO3  | (M+H)+  |
| 341.1051 | 1 | 377.79   | C20H17FNO3  | (M+H)+  |
| 360.1016 | 1 | 12999.96 | C20H16FNaO3 | (M+Na)+ |
| 361.1067 | 1 | 2045.46  | C20H16FNaO3 | (M+Na)+ |
| 362.1113 | 1 | 528.55   | C20H16FNaO3 | (M+Na)+ |
| 363.108  | 1 | 62.41    | C20H16FNaO3 | (M+Na)+ |

--- End Of Report ---

<sup>1</sup>H NMR spectrum of 2w (400 MHz, CDCl<sub>3</sub>)



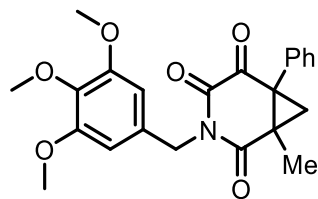

1-methyl-6-phenyl-3-(3,4,5-trimethoxybenzyl)-3-azabicyclo[4.1.0]heptane-2,4,5-trione

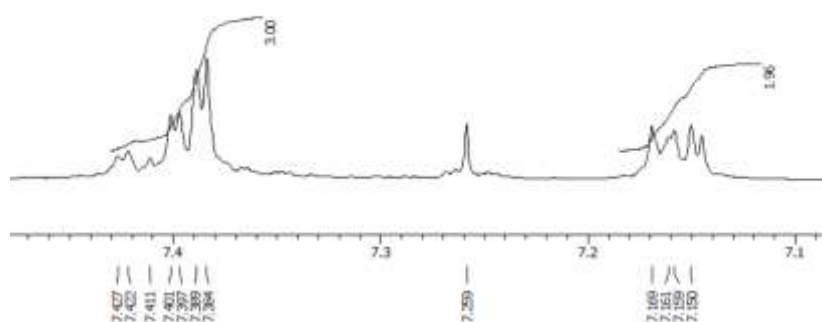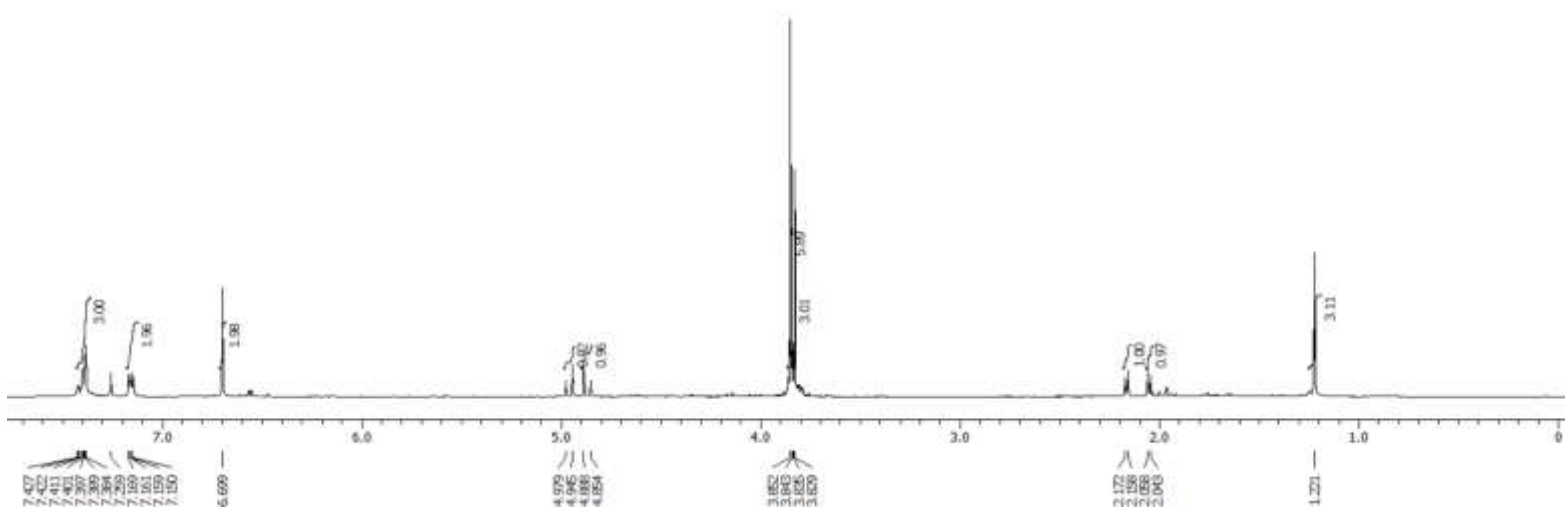

<sup>13</sup>C NMR spectrum of 2w (100 MHz, CDCl<sub>3</sub>)



1-methyl-6-phenyl-3-(3,4,5-trimethoxybenzyl)-3-azabicyclo[4.1.0]heptane-2,4,5-trione

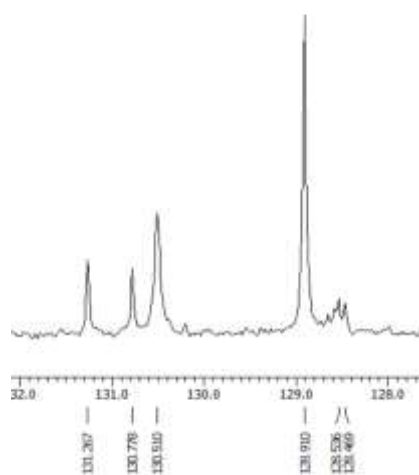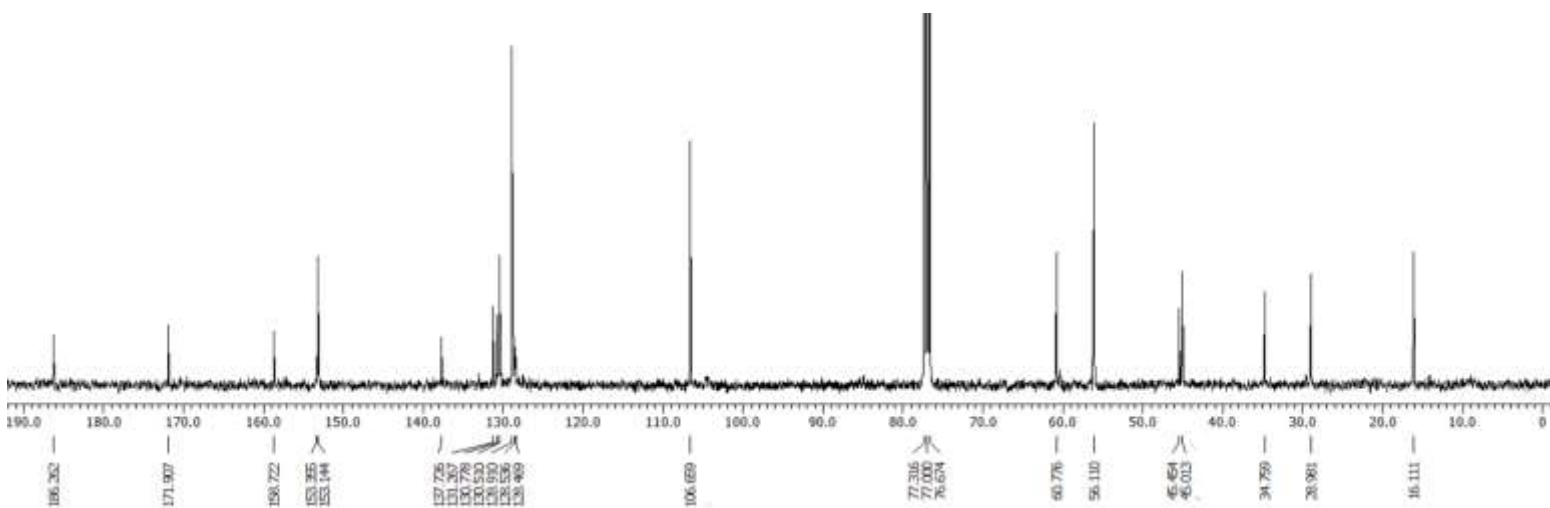

HRMS spectrum of 2w

|                    |                 |                               |         |                        |                                 |
|--------------------|-----------------|-------------------------------|---------|------------------------|---------------------------------|
| <b>Sample Name</b> | SMT 286         | <b>Position</b>               | P1-B10  | <b>Instrument Name</b> | BIOQTOF                         |
| <b>User Name</b>   | SYSTEM (SYSTEM) | <b>Inj Vol</b>                | 1       | <b>InjPosition</b>     |                                 |
| <b>Sample Type</b> | Sample          | <b>IRM Calibration Status</b> | Success | <b>Data Filename</b>   | SMT 286.d                       |
| <b>ACQ Method</b>  | Pos_100ACN.m    | <b>Comment</b>                |         | <b>Acquired Time</b>   | 27-04-2024 12:58:07 (UTC+05:30) |

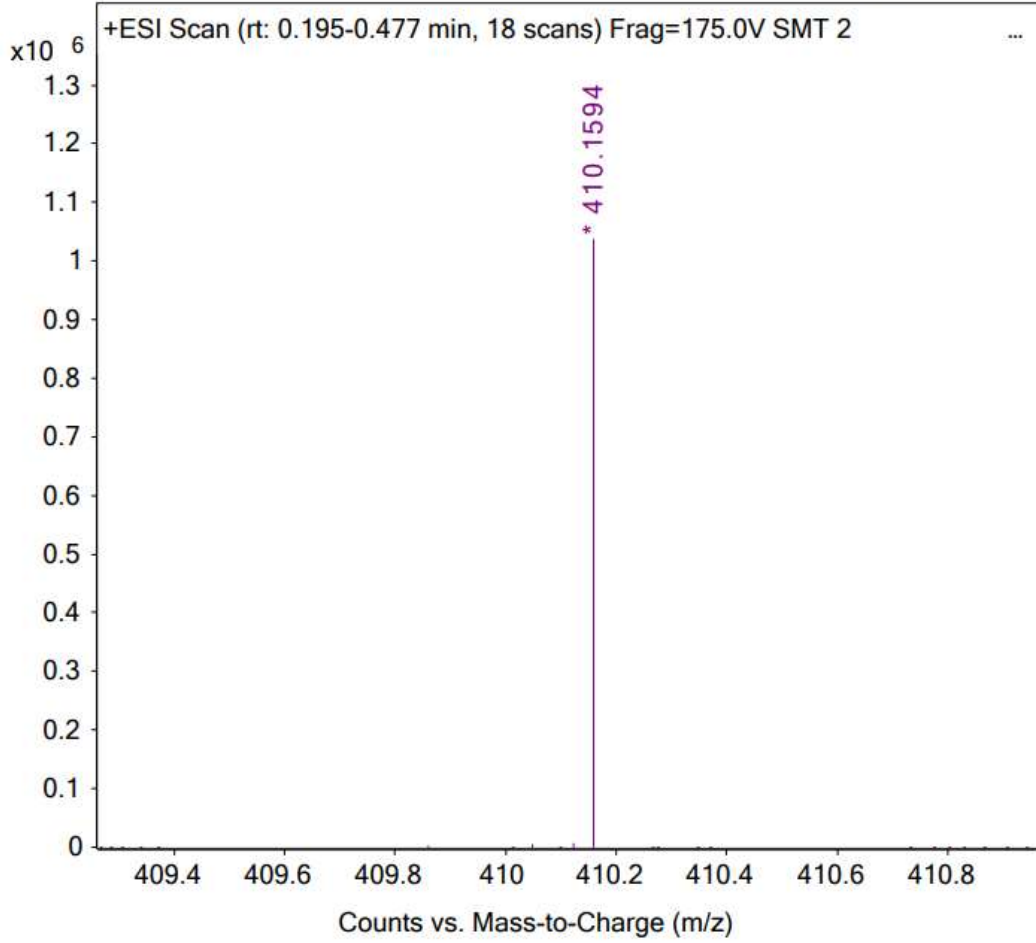

**<sup>1</sup>H NMR spectrum of 2x (400 MHz, CDCl<sub>3</sub>)**

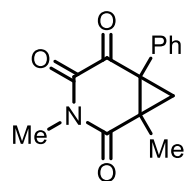

1,3-dimethyl-6-phenyl-3-azabicyclo[4.1.0]heptane-2,4,5-trione

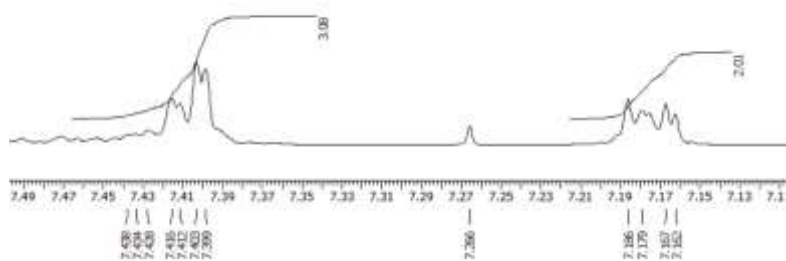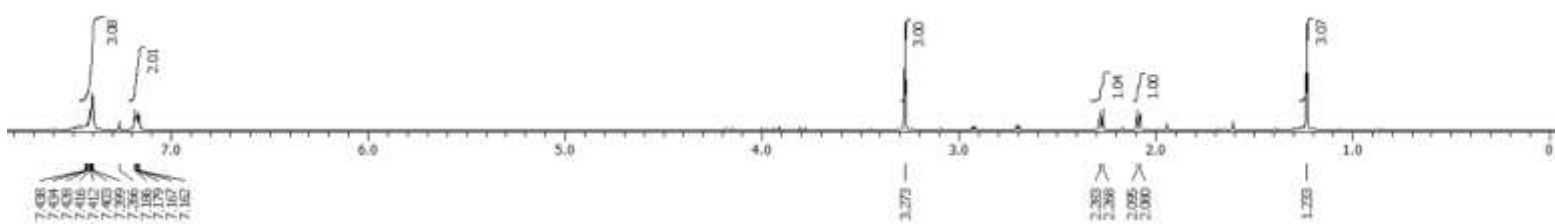

$^{13}\text{C}$  NMR spectrum of 2x (100 MHz,  $\text{CDCl}_3$ )



1,3-dimethyl-6-phenyl-3-azabicyclo[4.1.0]heptane-2,4,5-trione

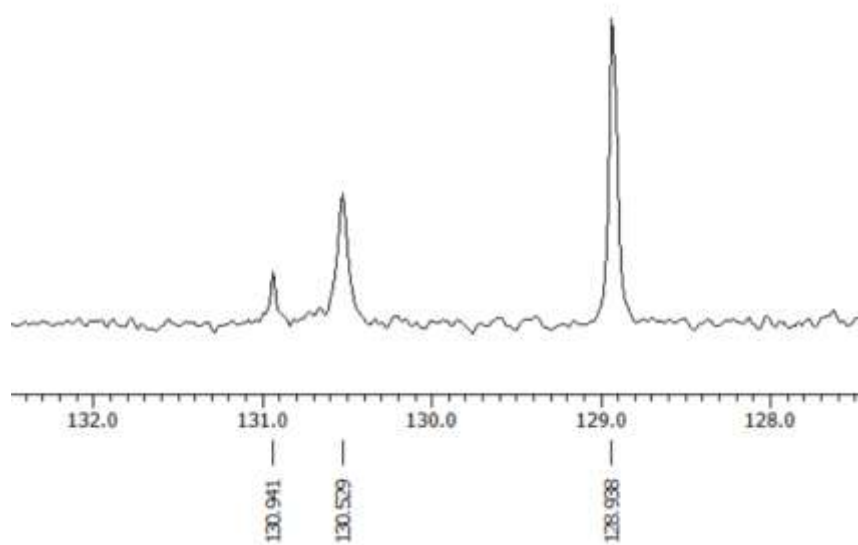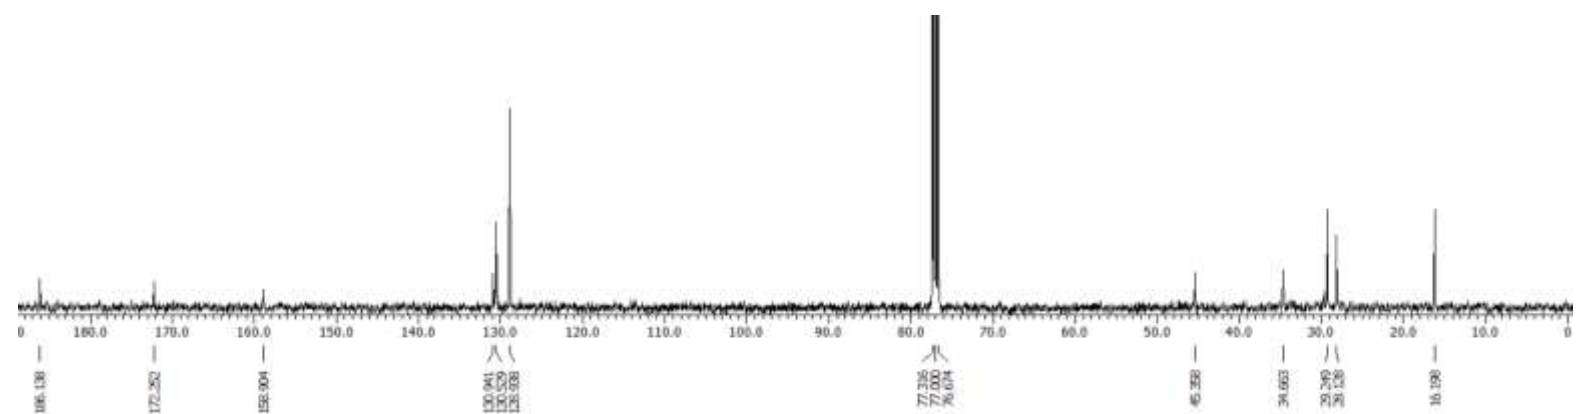

HRMS spectrum of 2x

# Qualitative Compound Report

|                               |              |                      |                     |
|-------------------------------|--------------|----------------------|---------------------|
| <b>Data File</b>              | SMT-292.d    | <b>Sample Name</b>   | SMT-292             |
| <b>Sample Type</b>            | Sample       | <b>Position</b>      | F1-03               |
| <b>Instrument Name</b>        | Instrument 1 | <b>User Name</b>     |                     |
| <b>Acq Method</b>             | MS Scan.m    | <b>Acquired Time</b> | 09-08-2023 14:21:23 |
| <b>IRM Calibration Status</b> |              | <b>DA Method</b>     | Default.m           |
| <b>Comment</b>                |              |                      |                     |

|                       |                             |              |   |
|-----------------------|-----------------------------|--------------|---|
| <b>Sample Group</b>   |                             | <b>Info.</b> | 3 |
| <b>Acquisition SW</b> | 6300 series TOF/6500 series |              |   |
| <b>Version</b>        | Q-TOF R.05.01 (06/125)      |              |   |

### Compound Table

| Compound Label      | RT    | Mass     | Abund  | Formula      | Tgt Mass | Diff (ppm) | MPG Formula  | DB Formula   |
|---------------------|-------|----------|--------|--------------|----------|------------|--------------|--------------|
| Cpd 1: C14 H13 N O3 | 0.126 | 243.0906 | 217222 | C14 H13 N O3 | 243.0895 | 4.33       | C14 H13 N O3 | C14 H13 N O3 |

| Compound Label      | m/z      | RT    | Algorithm       | Mass     |
|---------------------|----------|-------|-----------------|----------|
| Cpd 1: C14 H13 N O3 | 244.0978 | 0.126 | Find By Formula | 243.0906 |

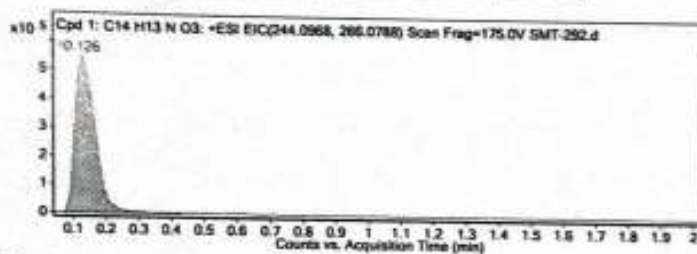

### MS Spectrum

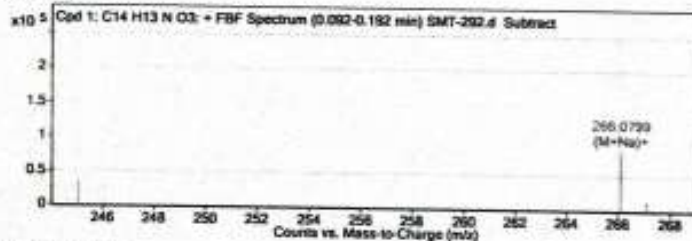

### MS Zoomed Spectrum

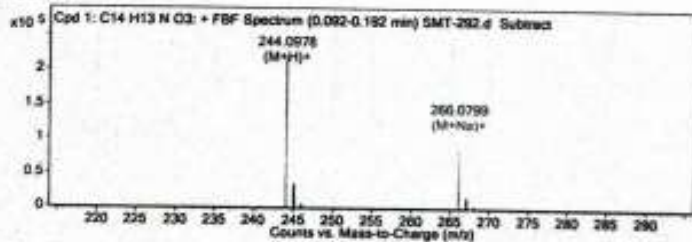

### MS Spectrum Peak List

| m/z      | # | Abund     | Formula     | Ion     |
|----------|---|-----------|-------------|---------|
| 244.0978 | 1 | 217221.75 | C14H14NO3   | (M+H)+  |
| 245.1008 | 1 | 34088.68  | C14H14NO3   | (M+H)+  |
| 246.1038 | 1 | 4136.03   | C14H14NO3   | (M+H)+  |
| 266.0799 | 1 | 88349.52  | C14H13NNaO3 | (M+Na)+ |
| 267.084  | 1 | 12788.71  | C14H13NNaO3 | (M+Na)+ |
| 268.0872 | 1 | 1568.69   | C14H13NNaO3 | (M+Na)+ |
| 269.0814 | 1 | 300.55    | C14H13NNaO3 | (M+Na)+ |

--- End Of Report ---

<sup>1</sup>H NMR spectrum of 2y (400 MHz, CDCl<sub>3</sub>)

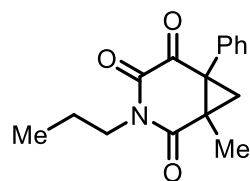

1-methyl-6-phenyl-3-propyl-3-azabicyclo[4.1.0]heptane-2,4,5-trione

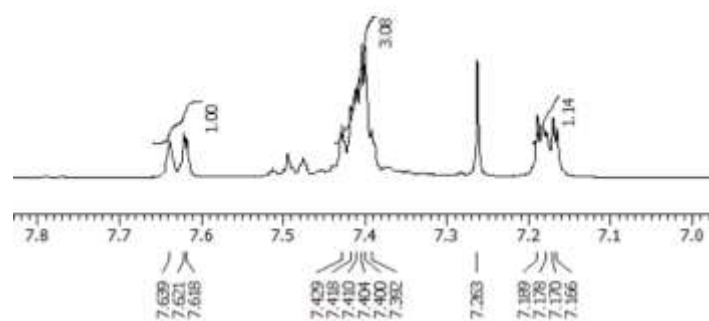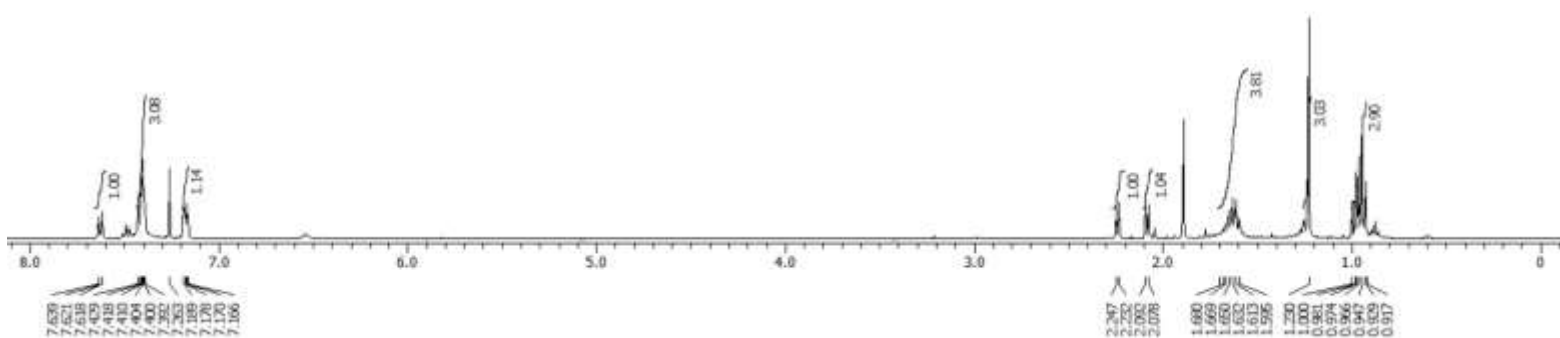

$^{13}\text{C}$  NMR spectrum of 2y (100 MHz,  $\text{CDCl}_3$ )

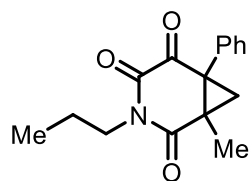

1-methyl-6-phenyl-3-propyl-3-azabicyclo[4.1.0]heptane-2,4,5-trione

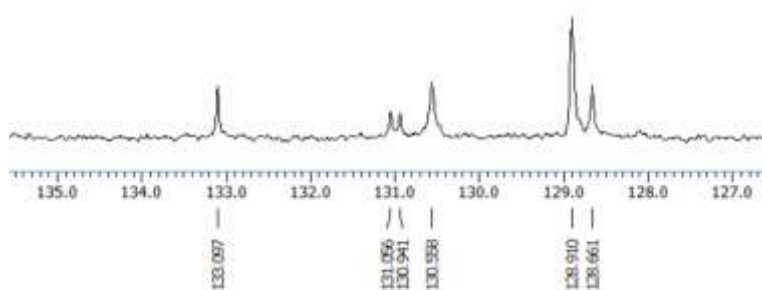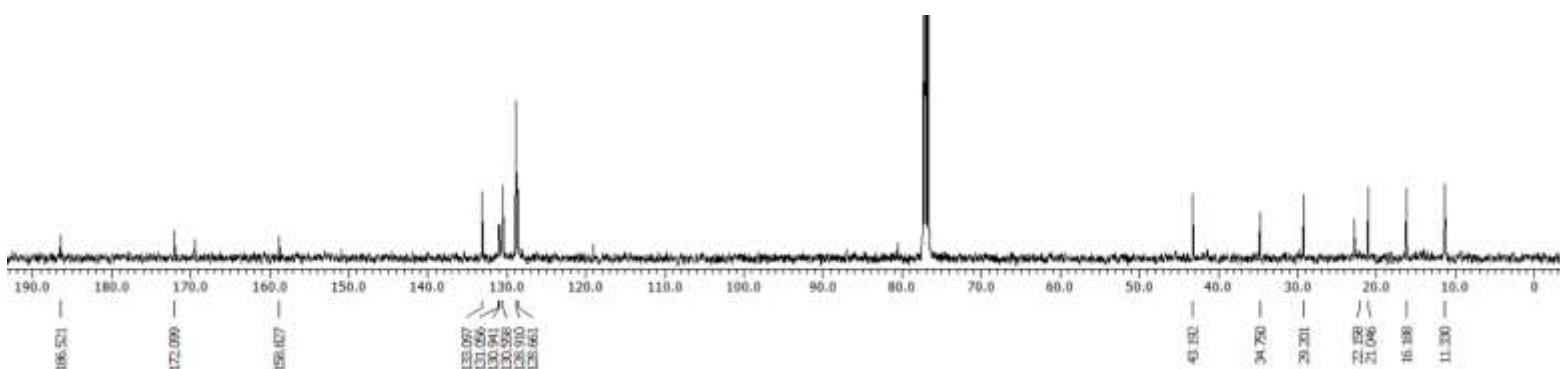

HRMS spectrum of 2y



## Qualitative Compound Report

|                               |              |                      |                     |
|-------------------------------|--------------|----------------------|---------------------|
| <b>Data File</b>              | SMT-337.d    | <b>Sample Name</b>   | SMT-337             |
| <b>Sample Type</b>            | Sample       | <b>Position</b>      | P1-04               |
| <b>Instrument Name</b>        | Instrument 1 | <b>User Name</b>     |                     |
| <b>Acq Method</b>             | MS Scan.m    | <b>Acquired Time</b> | 04-10-2023 13:07:59 |
| <b>IRM Calibration Status</b> |              | <b>DA Method</b>     | Default.m           |
| <b>Comment</b>                |              |                      |                     |

|                       |                             |              |   |
|-----------------------|-----------------------------|--------------|---|
| <b>Sample Group</b>   |                             | <b>Info.</b> | 3 |
| <b>Acquisition SW</b> | 6200 series TOF/MS00 series |              |   |
| <b>Version</b>        | Q-TOF B.05.01 (B5125)       |              |   |

### Compound Table

| Compound Label      | RT    | Mass     | Abund | Formula      | Tgt Mass | DIFF (ppm) | MFG Formula  | DB Formula   |
|---------------------|-------|----------|-------|--------------|----------|------------|--------------|--------------|
| Cpd 1: C16 H17 N O3 | 0.128 | 271.1224 | 90017 | C16 H17 N O3 | 271.1208 | 5.74       | C16 H17 N O3 | C16 H17 N O3 |

| Compound Label      | m/z      | RT    | Algorithm       | Mass     |
|---------------------|----------|-------|-----------------|----------|
| Cpd 1: C16 H17 N O3 | 272.1296 | 0.128 | Find By Formula | 271.1224 |

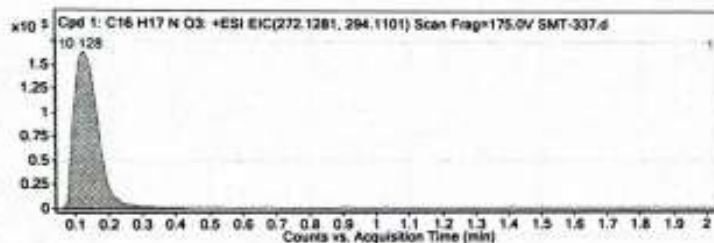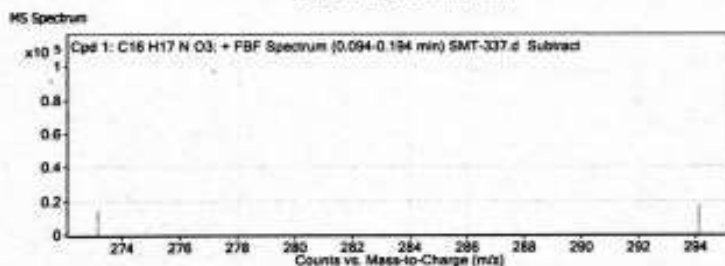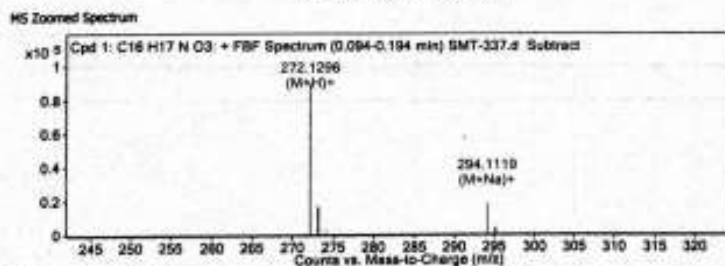

### MS Spectrum Peak List

| m/z      | z | Abund    | Formula     | Ion     |
|----------|---|----------|-------------|---------|
| 272.1296 | 1 | 90017.44 | C16H18NO3   | (H+H)+  |
| 273.133  | 1 | 15761.02 | C16H18NO3   | (H+H)+  |
| 294.1110 | 1 | 17787.05 | C16H17NNaO3 | (H+Na)+ |
| 295.1156 | 1 | 3542.04  | C16H17NNaO3 | (H+Na)+ |

--- End Of Report ---

<sup>1</sup>H NMR spectrum of 2z (400 MHz, CDCl<sub>3</sub>)

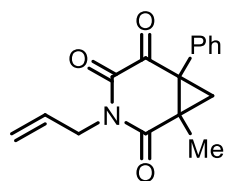

3-allyl-1-methyl-6-phenyl-3-azabicyclo[4.1.0]heptane-2,4,5-trione

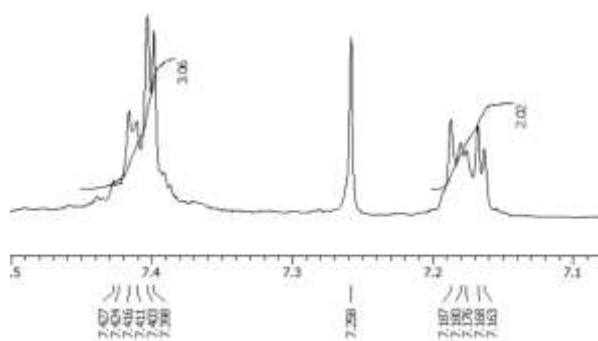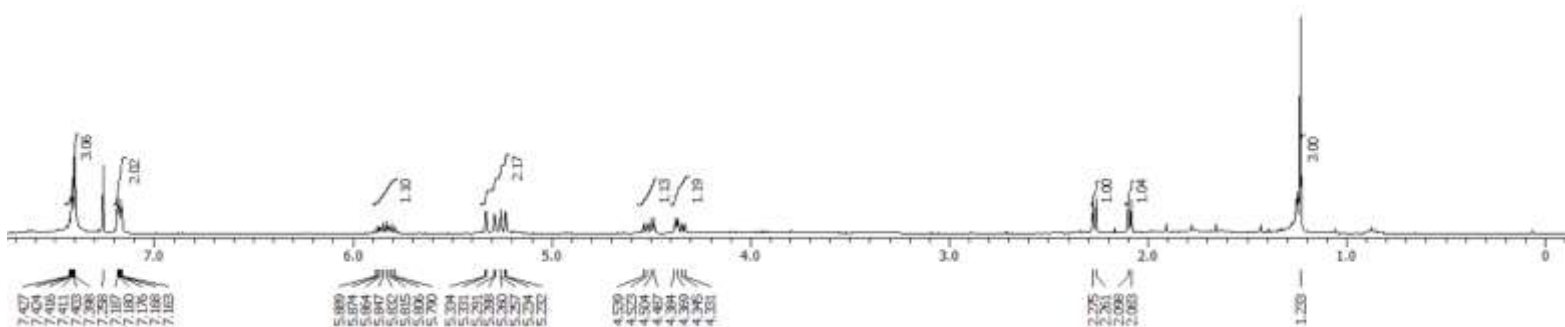

$^{13}\text{C}$  NMR spectrum of **2z** (100 MHz,  $\text{CDCl}_3$ )

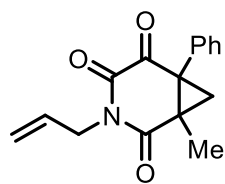

3-allyl-1-methyl-6-phenyl-3-azabicyclo[4.1.0]heptane-2,4,5-trione

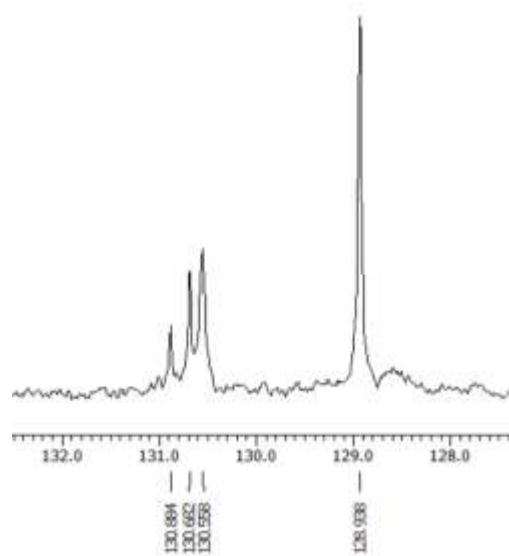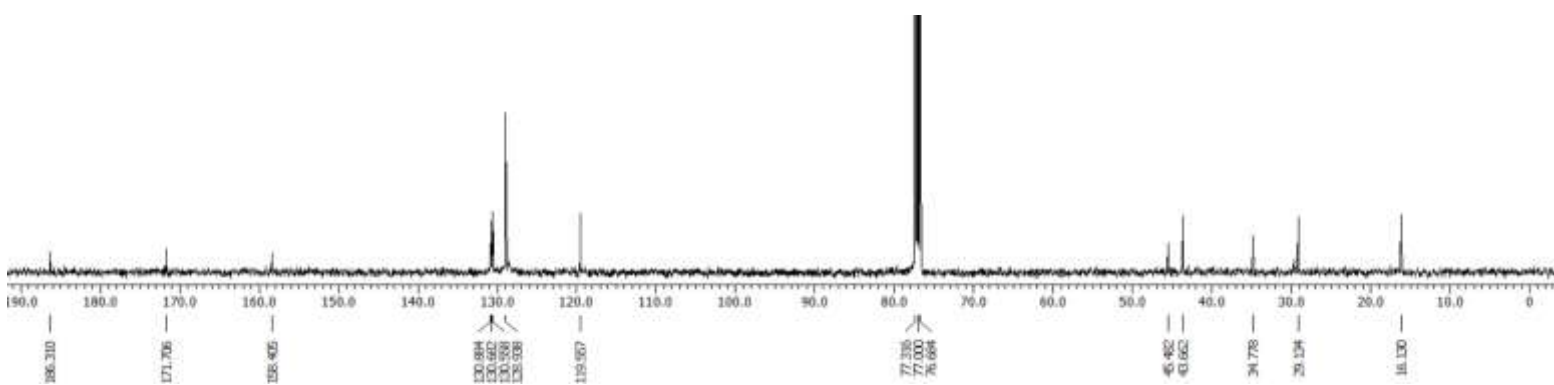

HRMS spectrum of 2z

|             |                 |                        |         |                 |                                 |
|-------------|-----------------|------------------------|---------|-----------------|---------------------------------|
| Sample Name | SMT 293         | Position               | P1-A11  | Instrument Name | BIOQTOF                         |
| User Name   | SYSTEM (SYSTEM) | Inj Vol                | 1       | InjPosition     |                                 |
| Sample Type | Sample          | IRM Calibration Status | Success | Data Filename   | SMT 293.d                       |
| ACQ Method  | Pos_100ACN.m    | Comment                |         | Acquired Time   | 27-04-2024 12:19:28 (UTC+05:30) |

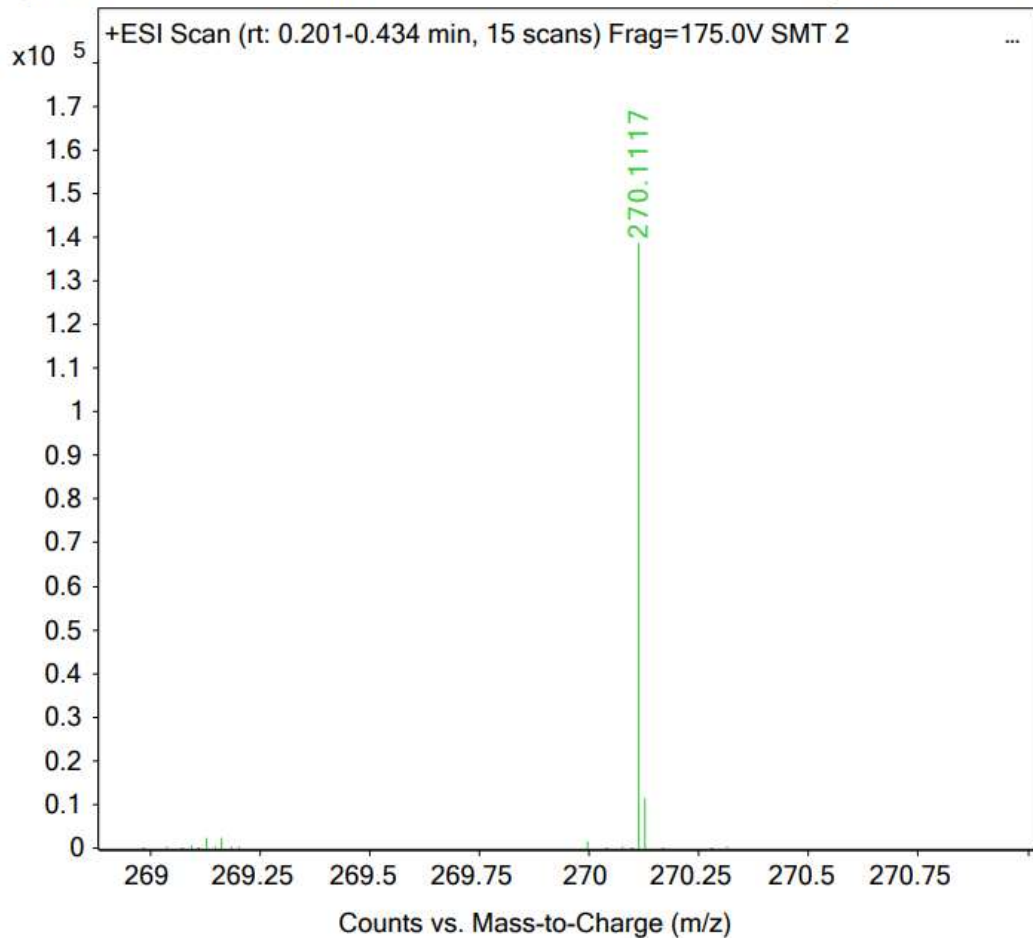

**$^1\text{H}$  NMR spectrum of 2aa (400 MHz,  $\text{CDCl}_3$ )**

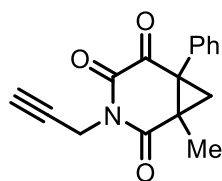

1-methyl-6-phenyl-3-(prop-2-yn-1-yl)-3-azabicyclo[4.1.0]heptane-2,4,5-trione

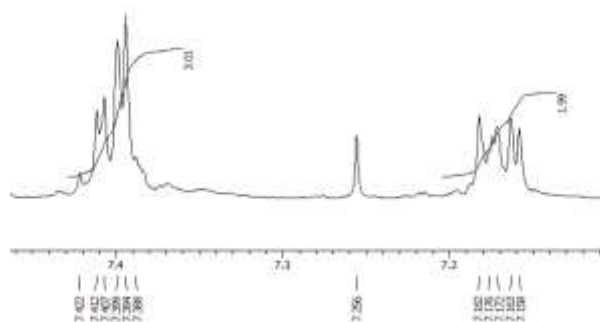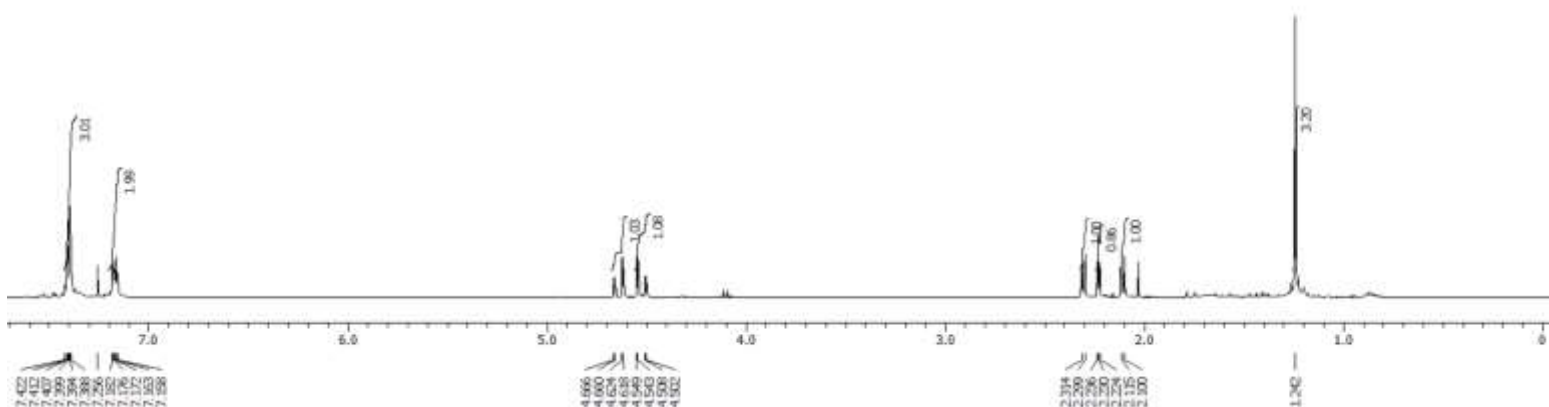

$^{13}\text{C}$  NMR spectrum of 2aa (100 MHz,  $\text{CDCl}_3$ )

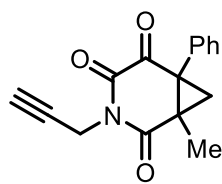

1-methyl-6-phenyl-3-(prop-2-yn-1-yl)-3-azabicyclo[4.1.0]heptane-2,4,5-trione

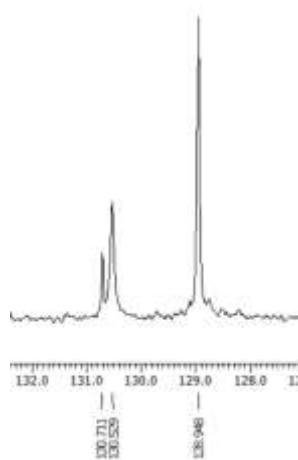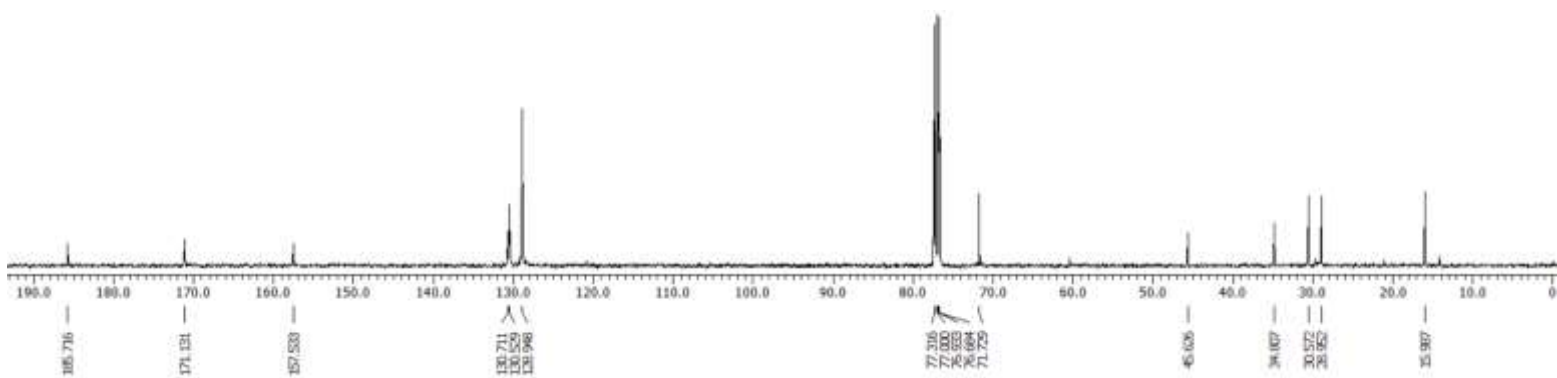

HRMS spectrum of 2aa

## Qualitative Compound Report

|                               |              |                      |                     |
|-------------------------------|--------------|----------------------|---------------------|
| <b>Data File</b>              | SMT-274.d    | <b>Sample Name</b>   | SMT-274             |
| <b>Sample Type</b>            | Sample       | <b>Position</b>      | PI-A7               |
| <b>Instrument Name</b>        | Instrument 1 | <b>User Name</b>     |                     |
| <b>Acq Method</b>             | MS Scan.m    | <b>Acquired Time</b> | 24-02-2024 12:31:31 |
| <b>IRM Calibration Status</b> | Success      | <b>DA Method</b>     | Default.m           |
| <b>Comment</b>                |              |                      |                     |

|                       |                             |             |   |
|-----------------------|-----------------------------|-------------|---|
| <b>Sample Group</b>   |                             | <b>Info</b> | 1 |
| <b>Acquisition SW</b> | 6200 series TOF/6500 series |             |   |
| <b>Version</b>        | Q-TOF B.05.01 (R5125)       |             |   |

### Compound Table

| Compound Label      | RT   | Mass     | Abund | Formula      | Tgt Mass | Diff (ppm) | MFG Formula  | DB Formula   |
|---------------------|------|----------|-------|--------------|----------|------------|--------------|--------------|
| Cpd 1: C16 H13 N O3 | 0.12 | 267.0892 | 7720  | C16 H13 N O3 | 267.0995 | -1.28      | C16 H13 N O3 | C16 H13 N O3 |

| Compound Label      | m/z      | RT   | Algorithm       | Mass     |
|---------------------|----------|------|-----------------|----------|
| Cpd 1: C16 H13 N O3 | 290.0806 | 0.12 | Find By Formula | 267.0892 |

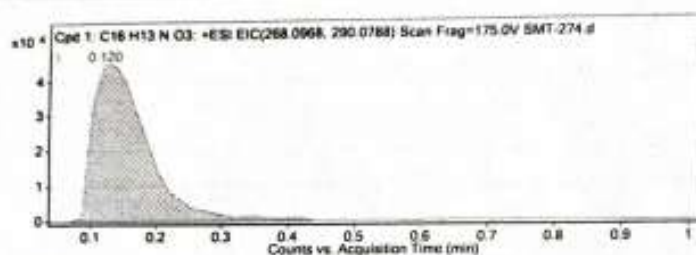

### MS Spectrum

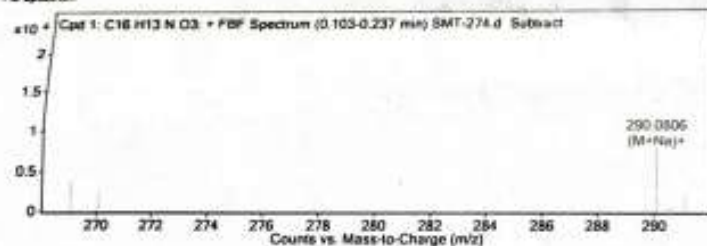

### MS Zoomed Spectrum

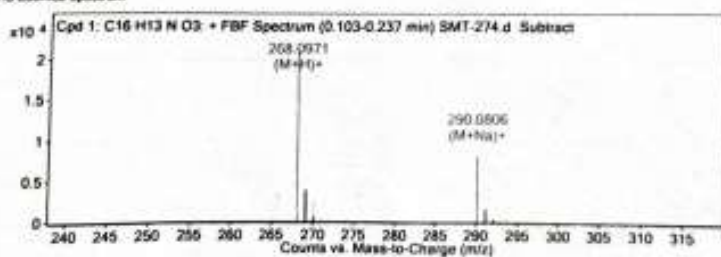

### MS Spectrum Peak List

| m/z      | z | Abund    | Formula     | Ion                 |
|----------|---|----------|-------------|---------------------|
| 268.0971 | 1 | 19404.28 | C16H14NO3   | [M+H] <sup>+</sup>  |
| 269.0992 | 1 | 3859.24  | C16H14NO3   | [M+H] <sup>+</sup>  |
| 270.087  | 1 | 2420.91  | C16H14NO3   | [M+H] <sup>+</sup>  |
| 290.0806 | 1 | 7719.63  | C16H13NNaO3 | [M+Na] <sup>+</sup> |
| 291.086  | 1 | 1756.64  | C16H13NNaO3 | [M+Na] <sup>+</sup> |
| 292.09   | 1 | 349.7    | C16H13NNaO3 | [M+Na] <sup>+</sup> |

--- End Of Report ---

<sup>1</sup>H NMR spectrum of 2ab (400 MHz, CDCl<sub>3</sub>)

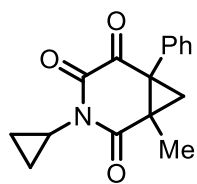

3-cyclopropyl-1-methyl-6-phenyl-3-azabicyclo[4.1.0]heptane-2,4,5-trione

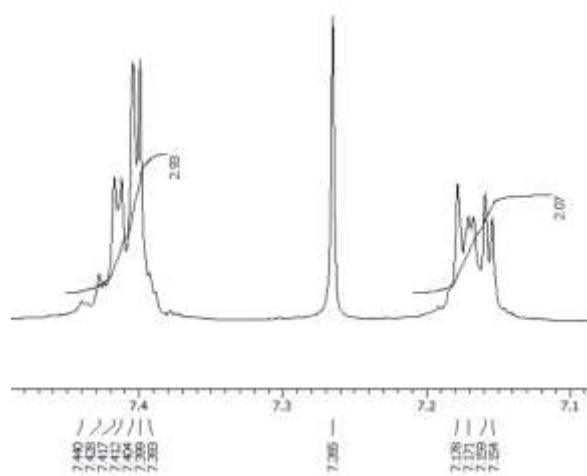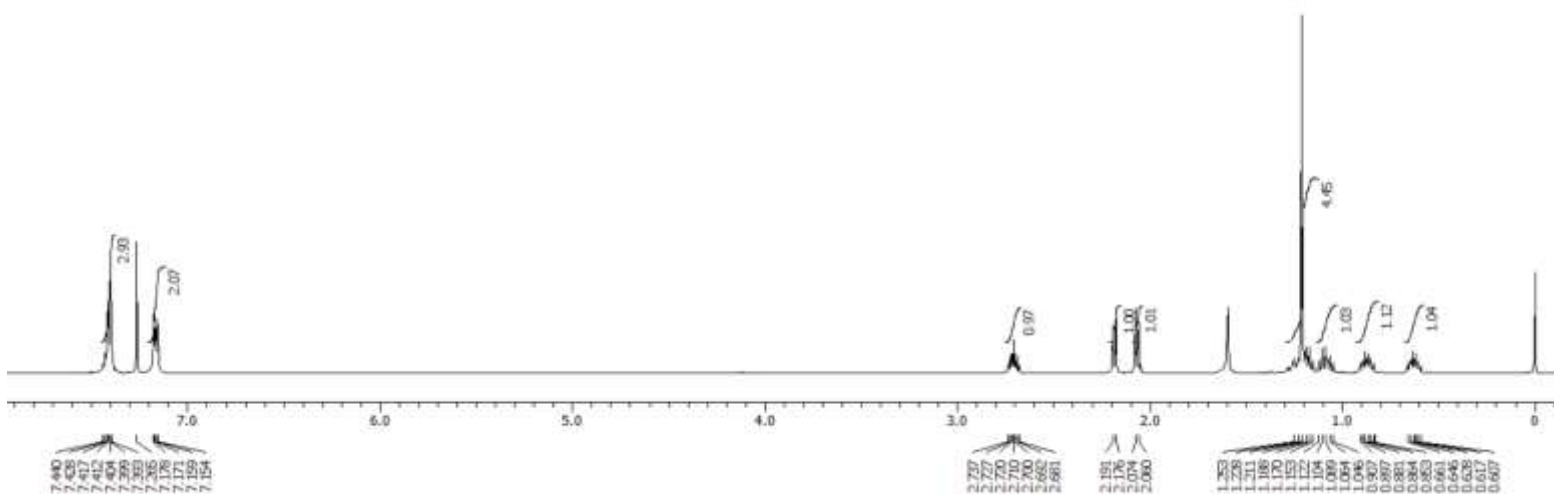

<sup>13</sup>C NMR spectrum of 2ab (100 MHz, CDCl<sub>3</sub>)





3-cyclopropyl-1-methyl-6-phenyl-3-azabicyclo[4.1.0]heptane-2,4,5-trione

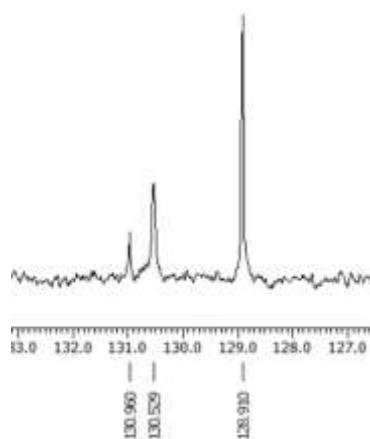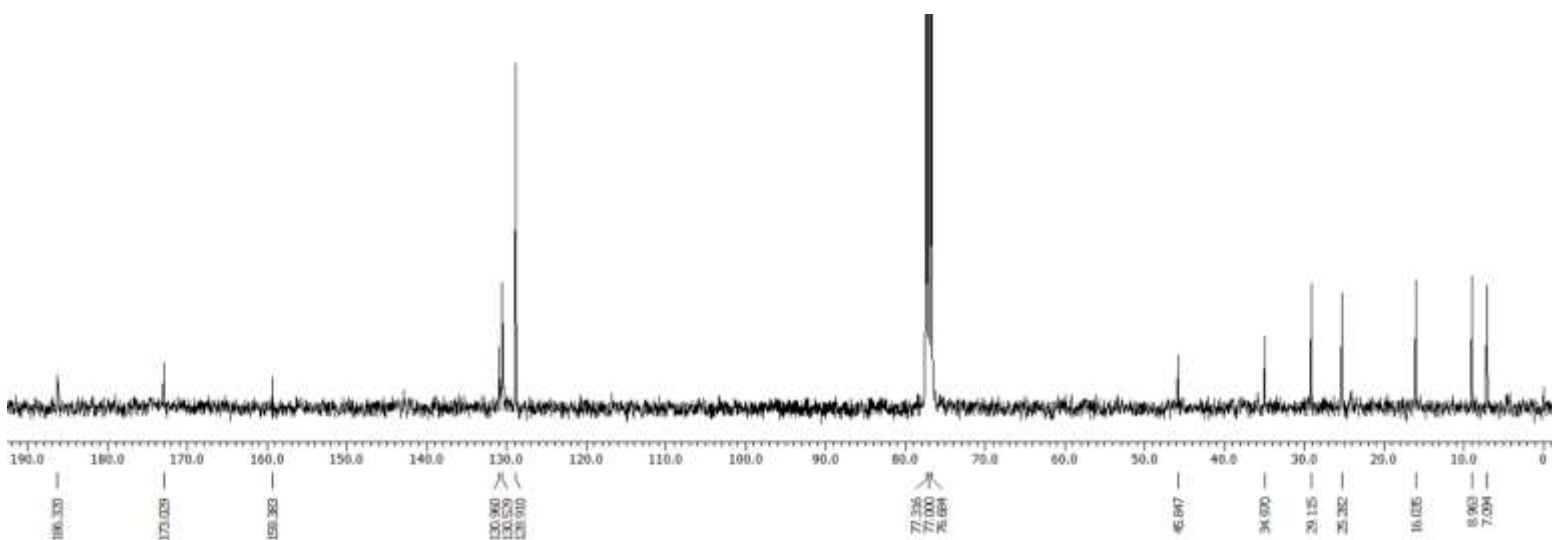

HRMS spectrum of 2ab

## Qualitative Compound Report

|                        |                             |               |                     |
|------------------------|-----------------------------|---------------|---------------------|
| Data File              | SMT-241.d                   | Sample Name   | SMT-241             |
| Sample Type            | Sample                      | Position      | F1-04               |
| Instrument Name        | Instrument 1                | User Name     |                     |
| Acq Method             | MS ScanLn                   | Acquired Time | 22-07-2023 13:03:13 |
| IRM Calibration Status |                             | DA Method     | Default.m           |
| Comment                |                             |               |                     |
| Sample Group           |                             | Info.         | 3                   |
| Acquisition SW         | 6202 series TDF/6200 series |               |                     |
| Version                | Q-TDF 8.05.01 (85125)       |               |                     |

### Compound Table

| Compound Label      | RT    | Mass    | Abund  | Formula      | Tot Mass | GC   | HPC Formula  | DB Formula   |
|---------------------|-------|---------|--------|--------------|----------|------|--------------|--------------|
| Cap 1: C16 H15 N O3 | 0.092 | 268.106 | 146165 | C16 H15 N O3 | 268.1052 | 3.04 | C16 H15 N O3 | C16 H15 N O3 |

| Compound Label      | m/z      | RT    | Algorithm       | Mass    |
|---------------------|----------|-------|-----------------|---------|
| Cap 1: C16 H15 N O3 | 270.1133 | 0.092 | Find By Formula | 268.106 |

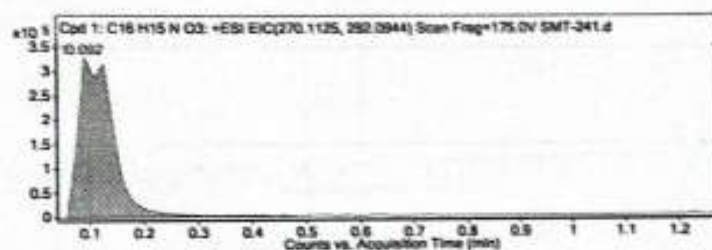

### MS Spectrum

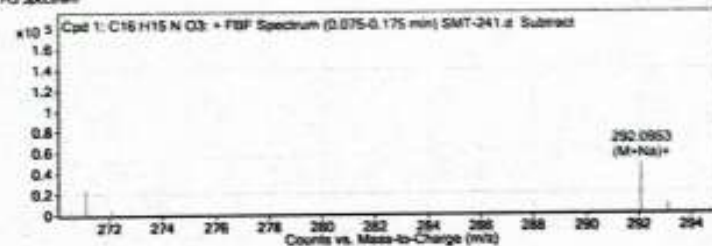

### MS Zoomed Spectrum

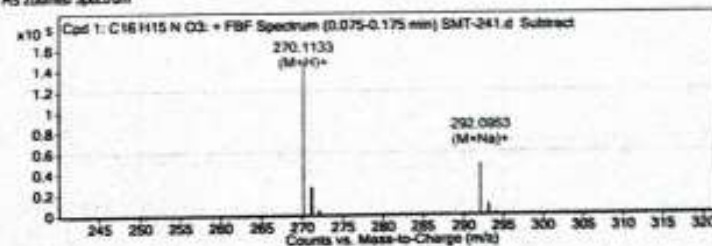

### MS Spectrum Peak List

| m/z      | # | Abund     | Formula     | Ion     |
|----------|---|-----------|-------------|---------|
| 270.1133 | 1 | 146165.22 | C16H16NO3   | (M+H)+  |
| 271.1164 | 1 | 29012.88  | C16H16NO3   | (M+H)+  |
| 272.1196 | 1 | 3277.24   | C16H16NO3   | (M+H)+  |
| 292.0953 | 1 | 48254.04  | C16H15NNaO3 | (M+Na)+ |
| 293.0986 | 1 | 8668.77   | C16H15NNaO3 | (M+Na)+ |
| 294.102  | 1 | 1351.5    | C16H15NNaO3 | (M+Na)+ |
| 295.105  | 1 | 267       | C16H15NNaO3 | (M+Na)+ |

--- End Of Report ---

<sup>1</sup>H NMR spectrum of 2ac (400 MHz, CDCl<sub>3</sub>)

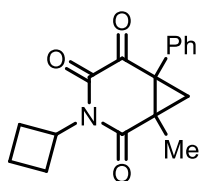

3-cyclobutyl-1-methyl-6-phenyl-3-azabicyclo[4.1.0]heptane-2,4,5-trione

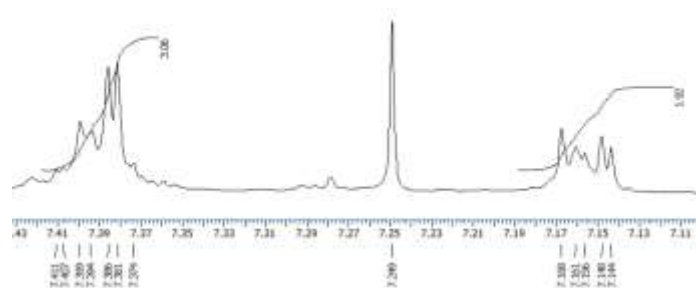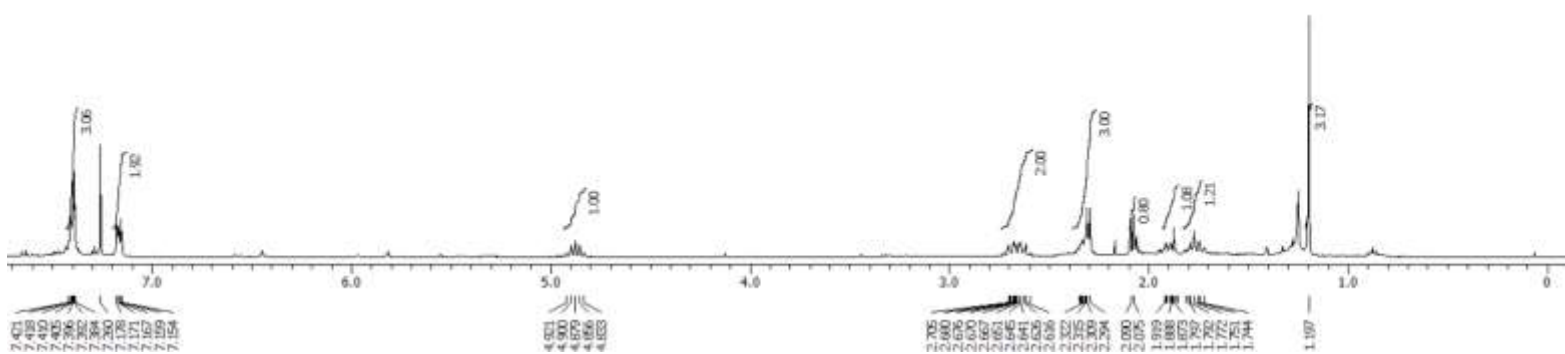

$^{13}\text{C}$  NMR spectrum of 2ac (100 MHz,  $\text{CDCl}_3$ )

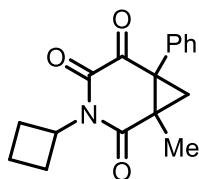

3-cyclobutyl-1-methyl-6-phenyl-3-azabicyclo[4.1.0]heptane-2,4,5-trione

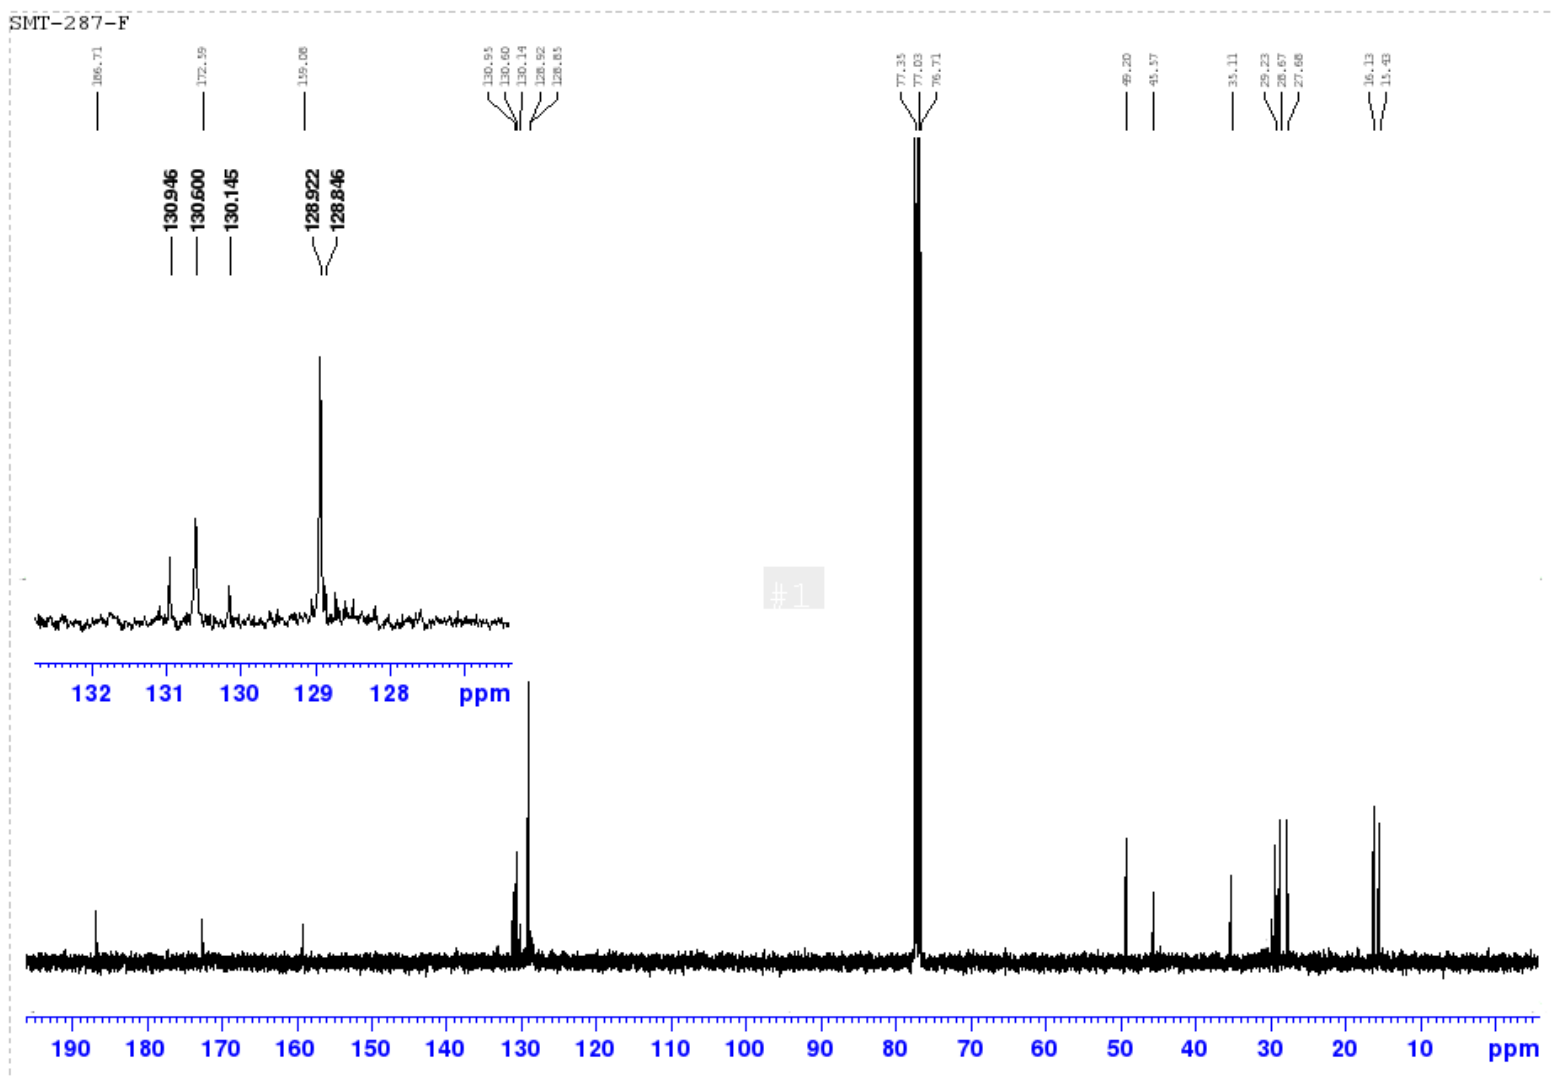

HRMS spectrum of 2ac

## Qualitative Compound Report

|                               |              |                      |                     |
|-------------------------------|--------------|----------------------|---------------------|
| <b>Data File</b>              | SMT-287.d    | <b>Sample Name</b>   | SMT-287             |
| <b>Sample Type</b>            | Sample       | <b>Position</b>      | P1-04               |
| <b>Instrument Name</b>        | Instrument 1 | <b>User Name</b>     |                     |
| <b>Acq Method</b>             | MS Scan.m    | <b>Acquired Time</b> | 02-05-2024 14:06:04 |
| <b>IRM Calibration Status</b> | Not Cal      | <b>DA Method</b>     | Default.m           |
| <b>Comment</b>                |              |                      |                     |

|                       |                             |              |   |
|-----------------------|-----------------------------|--------------|---|
| <b>Sample Group</b>   |                             | <b>Info.</b> | 3 |
| <b>Acquisition SW</b> | 6200 series TOF/6500 series |              |   |
| <b>Version</b>        | Q-TOF B.05.01 (R5125)       |              |   |

### Compound Table

| Compound Label      | RT    | Mass     | Abund  | Formula      | Tgt Mass | Diff (ppm) | HFG Formula  | DB Formula   |
|---------------------|-------|----------|--------|--------------|----------|------------|--------------|--------------|
| Cpd 1: C17 H17 N O3 | 0.381 | 283.1214 | 116974 | C17 H17 N O3 | 283.1208 | 2.13       | C17 H17 N O3 | C17 H17 N O3 |

| Compound Label      | m/z      | RT    | Algorithm       | Mass     |
|---------------------|----------|-------|-----------------|----------|
| Cpd 1: C17 H17 N O3 | 306.1105 | 0.381 | Find By Formula | 283.1214 |

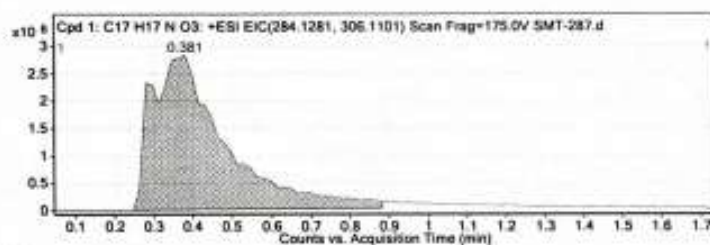

### MS Spectrum

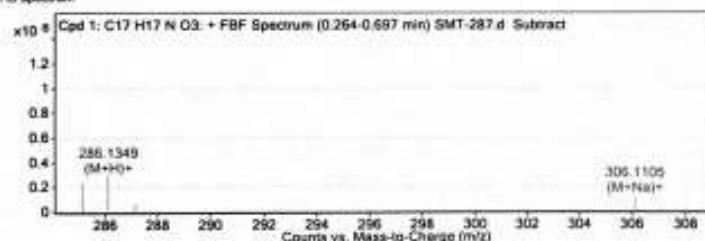

### MS Zoomed Spectrum

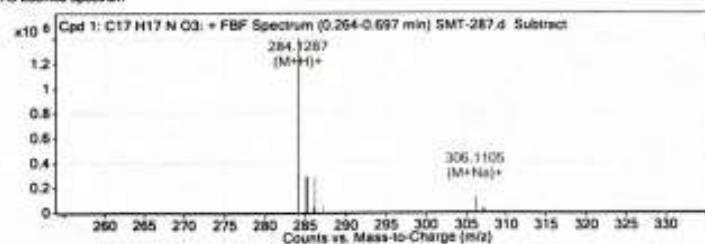

### MS Spectrum Peak List

| m/z      | z | Abund     | Formula    | Ion                 |
|----------|---|-----------|------------|---------------------|
| 284.1287 | 1 | 1207303   | C17H18NO3  | [M+H] <sup>+</sup>  |
| 285.1319 | 1 | 235527.08 | C17H18NO3  | [M+H] <sup>+</sup>  |
| 286.1349 | 1 | 285519.47 | C17H18NO3  | [M+H] <sup>+</sup>  |
| 287.1377 | 1 | 58143.21  | C17H18NO3  | [M+H] <sup>+</sup>  |
| 288.1389 | 1 | 6946.44   | C17H18NO3  | [M+H] <sup>+</sup>  |
| 306.1105 | 1 | 156974.35 | C17H17NaO3 | [M+Na] <sup>+</sup> |
| 307.1138 | 1 | 21103.47  | C17H17NaO3 | [M+Na] <sup>+</sup> |
| 308.1196 | 1 | 3689.51   | C17H17NaO3 | [M+Na] <sup>+</sup> |
| 309.1117 | 1 | 113.18    | C17H17NaO3 | [M+Na] <sup>+</sup> |

--- End Of Report ---

<sup>1</sup>H NMR spectrum of 4a (400 MHz, CDCl<sub>3</sub>)

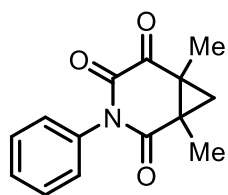

1,6-dimethyl-3-phenyl-3-azabicyclo[4.1.0]heptane-2,4,5-trione

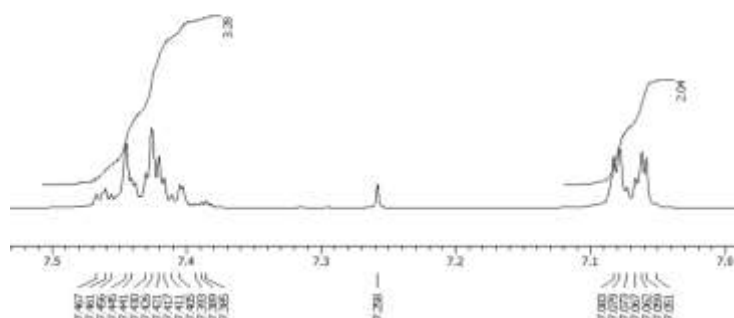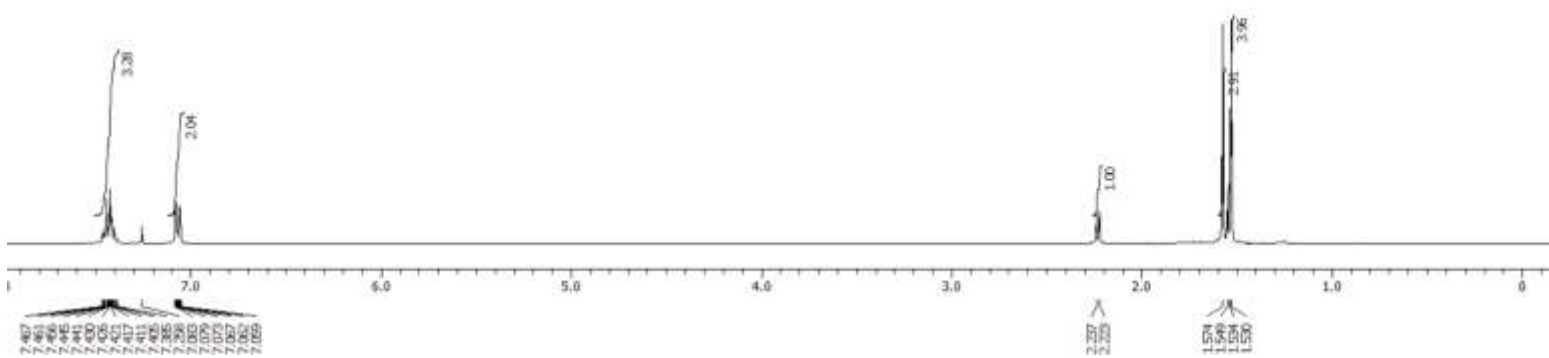

$^{13}\text{C}$  NMR spectrum of 4a (100 MHz,  $\text{CDCl}_3$ )

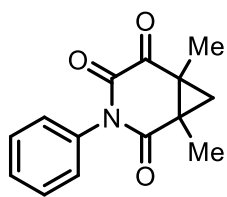

1,6-dimethyl-3-phenyl-3-azabicyclo[4.1.0]heptane-2,4,5-trione

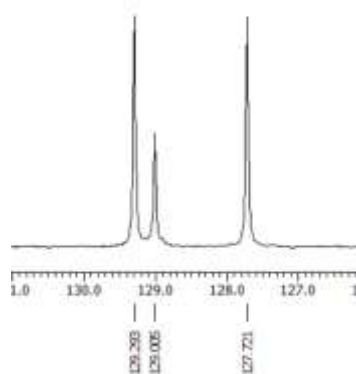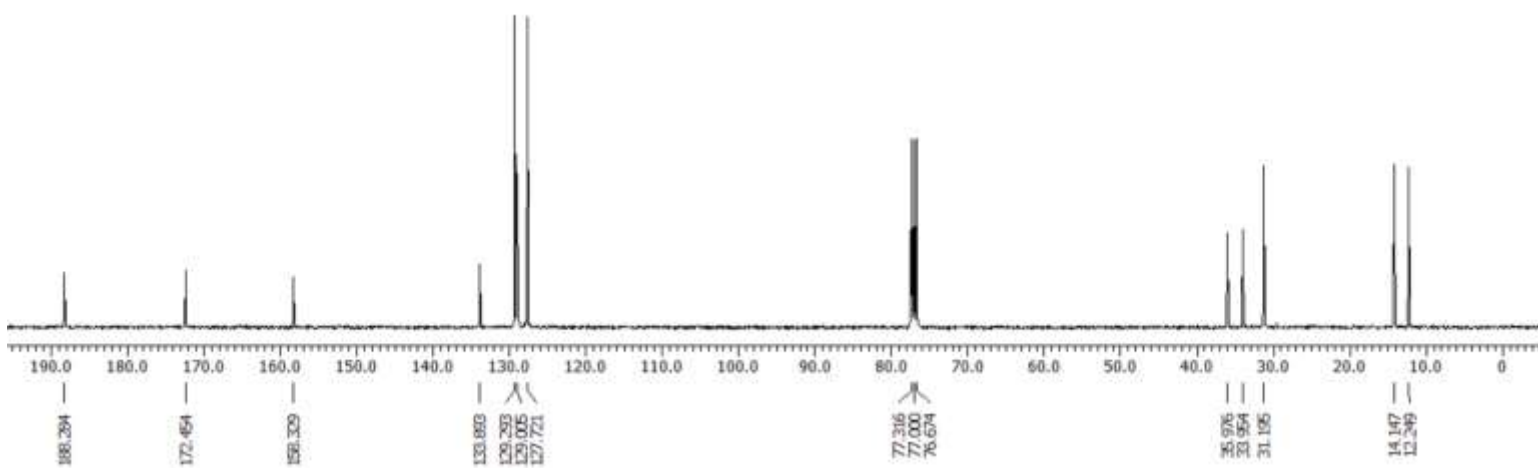

HRMS spectrum of 4a

|                    |                 |                               |         |                        |                                 |
|--------------------|-----------------|-------------------------------|---------|------------------------|---------------------------------|
| <b>Sample Name</b> | SMT 279         | <b>Position</b>               | P1-C2   | <b>Instrument Name</b> | BIOQTOF                         |
| <b>User Name</b>   | SYSTEM (SYSTEM) | <b>Inj Vol</b>                | 1       | <b>InjPosition</b>     |                                 |
| <b>Sample Type</b> | Sample          | <b>IRM Calibration Status</b> | Success | <b>Data Filename</b>   | SMT 279.d                       |
| <b>ACQ Method</b>  | Pos_100ACN.m    | <b>Comment</b>                |         | <b>Acquired Time</b>   | 27-04-2024 13:09:43 (UTC+05:30) |

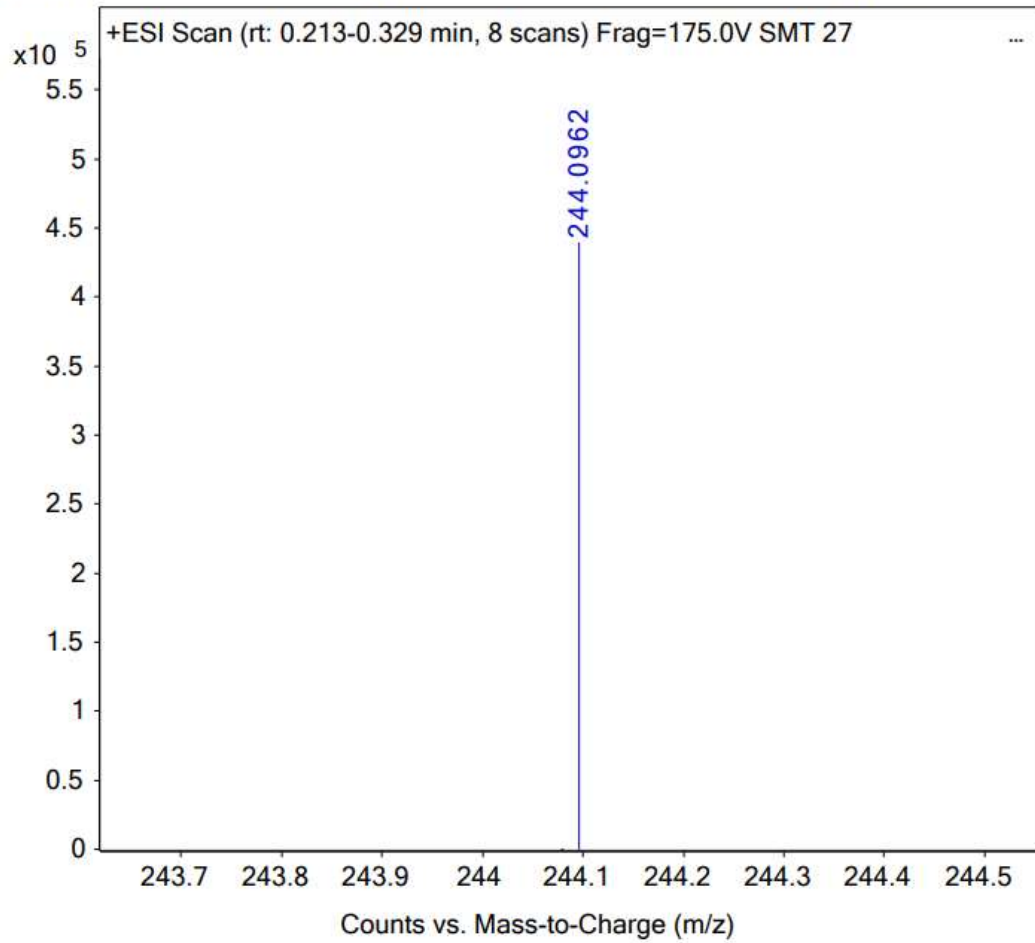

**<sup>1</sup>H NMR spectrum of 4b (400 MHz, CDCl<sub>3</sub>)**



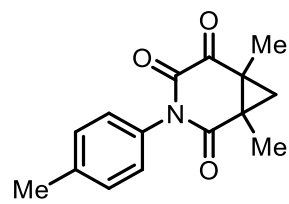

1,6-dimethyl-3-(*p*-tolyl)-3-azabicyclo[4.1.0]heptane-2,4,5-trione

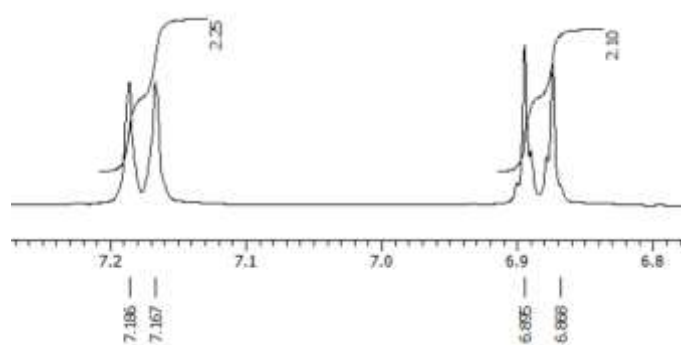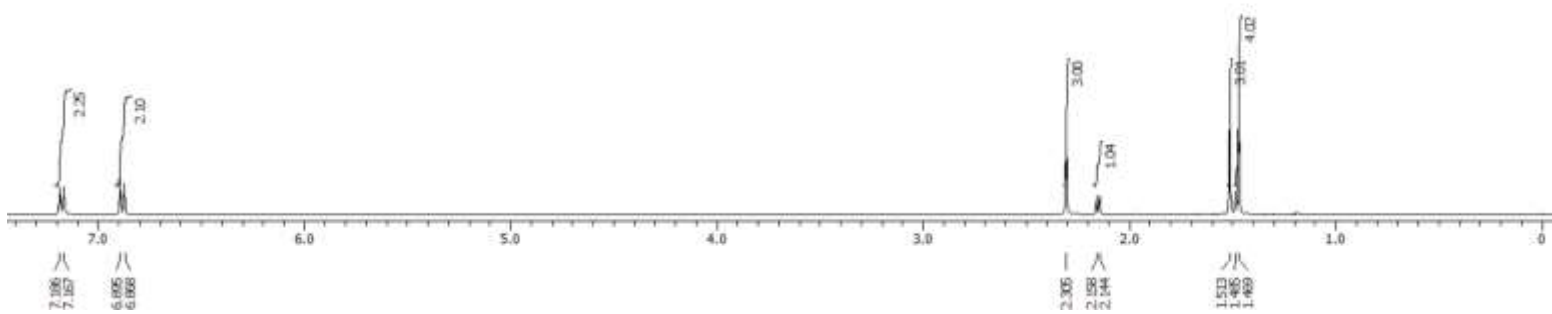

<sup>13</sup>C NMR spectrum of 4b (100 MHz, CDCl<sub>3</sub>)

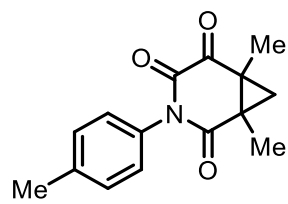

1,6-dimethyl-3-(*p*-tolyl)-3-azabicyclo[4.1.0]heptane-2,4,5-trione

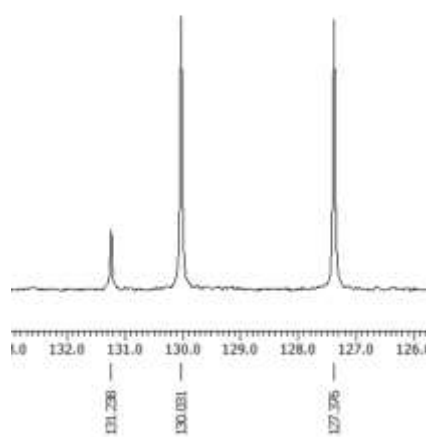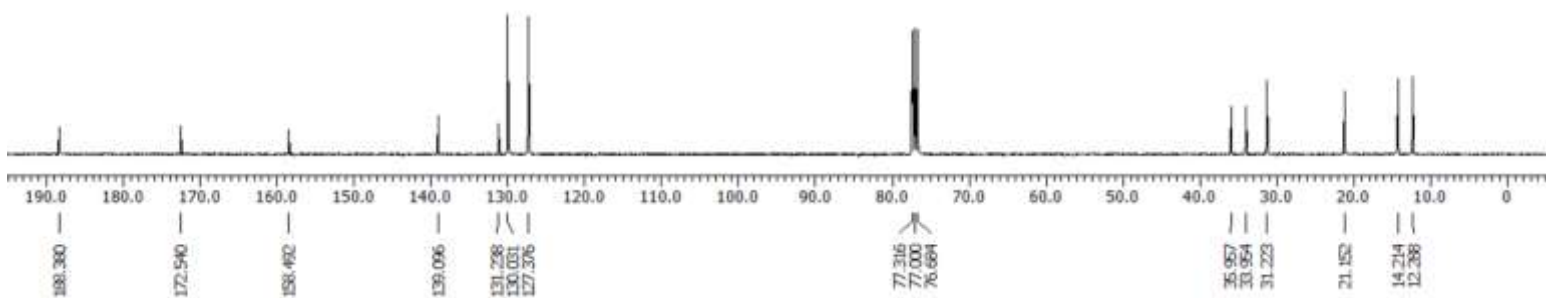

HRMS spectrum of 4b

|                    |                 |                               |         |                        |                                 |
|--------------------|-----------------|-------------------------------|---------|------------------------|---------------------------------|
| <b>Sample Name</b> | SMT 294         | <b>Position</b>               | P1-A3   | <b>Instrument Name</b> | BIOQTOF                         |
| <b>User Name</b>   | SYSTEM (SYSTEM) | <b>Inj Vol</b>                | 1       | <b>InjPosition</b>     |                                 |
| <b>Sample Type</b> | Sample          | <b>IRM Calibration Status</b> | Success | <b>Data Filename</b>   | SMT 294.d                       |
| <b>ACQ Method</b>  | Pos_100ACN.m    | <b>Comment</b>                |         | <b>Acquired Time</b>   | 27-04-2024 11:48:37 (UTC+05:30) |

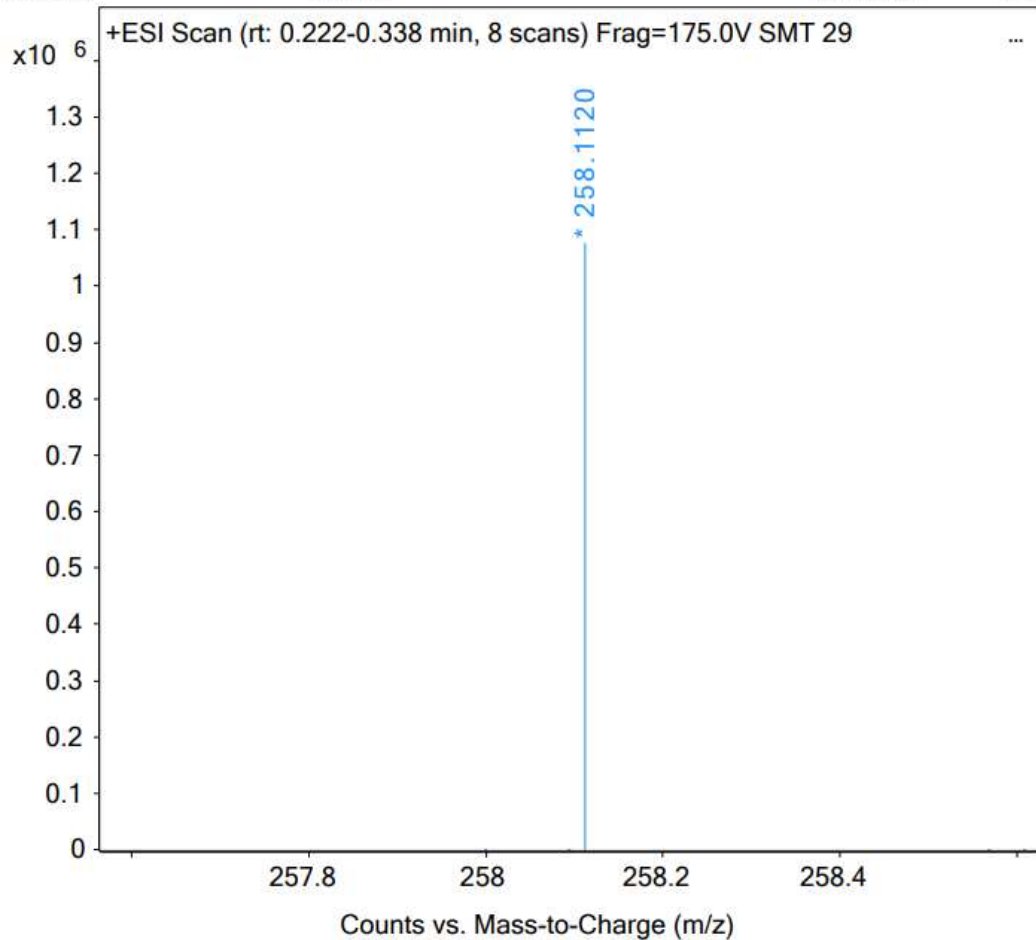

**<sup>1</sup>H NMR spectrum of 4c (400 MHz, CDCl<sub>3</sub>)**

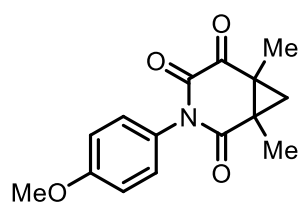

3-(4-methoxyphenyl)-1,6-dimethyl-3-azabicyclo[4.1.0]heptane-2,4,5-trione

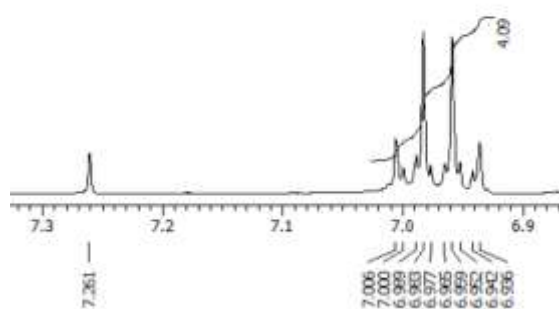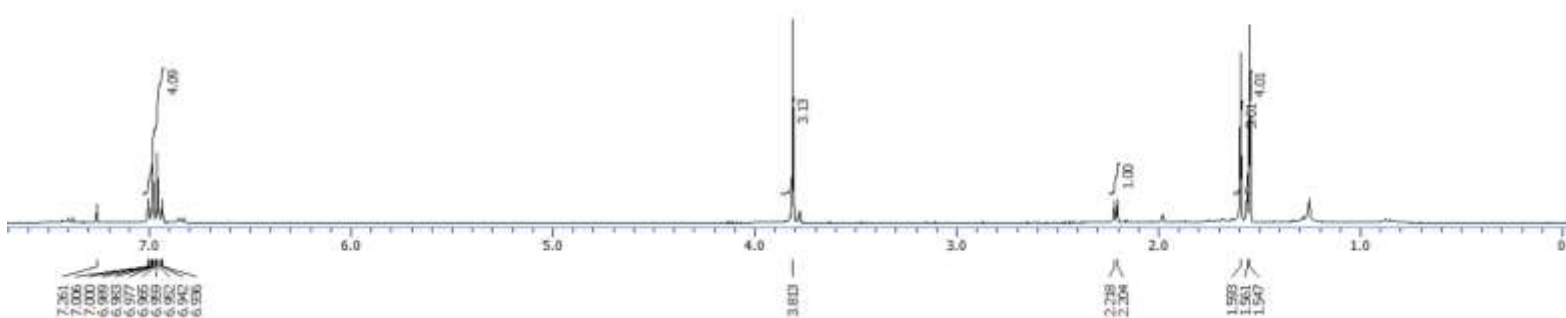

$^{13}\text{C}$  NMR spectrum of 4c (100 MHz,  $\text{CDCl}_3$ )

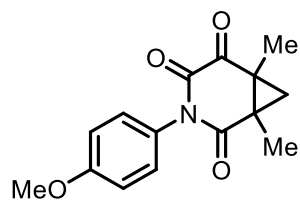

3-(4-methoxyphenyl)-1,6-dimethyl-3-azabicyclo[4.1.0]heptane-2,4,5-trione

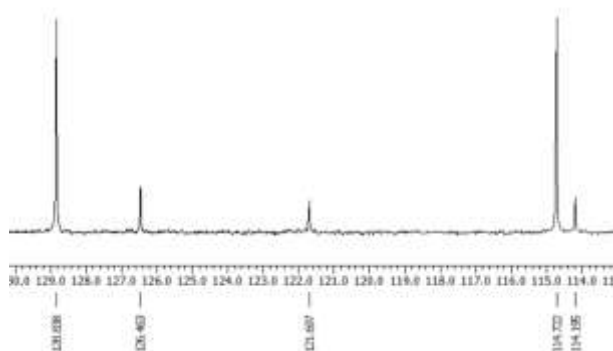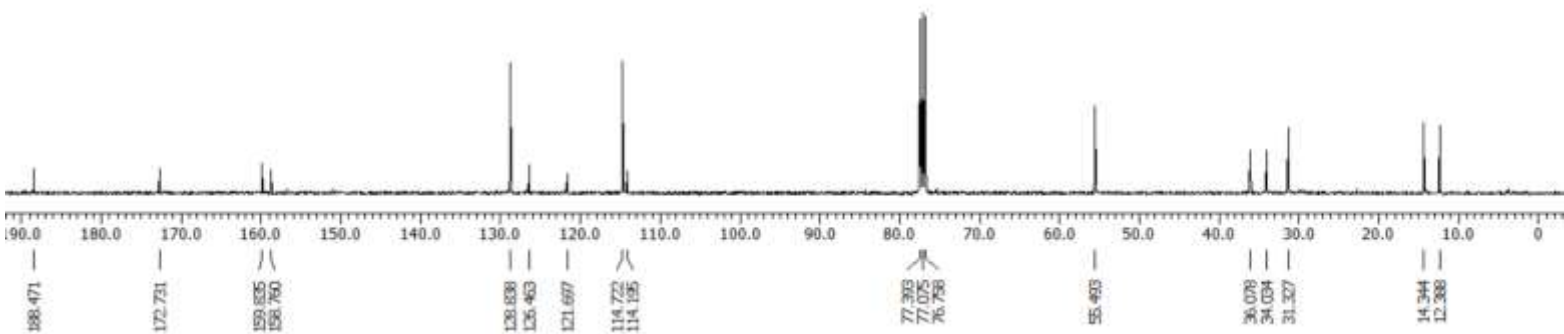

HRMS spectrum of 4c

## Qualitative Compound Report

|                        |                                                   |               |                     |
|------------------------|---------------------------------------------------|---------------|---------------------|
| Data File              | SMT-295.d                                         | Sample Name   | SMT-295             |
| Sample Type            | Sample                                            | Position      | F1-C1               |
| Instrument Name        | Instrument 1                                      | User Name     |                     |
| Acq Method             | MS Scan.m                                         | Acquired Time | 14-08-2023 13:34:58 |
| IRM Calibration Status |                                                   | DA Method     | Default             |
| Comment                |                                                   |               |                     |
| Sample Group           |                                                   | Info.         | 3                   |
| Acquisition SW Version | 6200 series TOF/6500 series Q-TOF B.05.01 (65125) |               |                     |

### Compound Table

| Compound Label      | RT    | Mass     | Abund | Formula      | Tgt Mass | Diff (ppm) | HFG Formula  | DB Formula   |
|---------------------|-------|----------|-------|--------------|----------|------------|--------------|--------------|
| Cpd 1: C15 H15 N O4 | 0.128 | 273.1094 | 16528 | C15 H15 N O4 | 273.1001 | 1.02       | C15 H15 N O4 | C15 H15 N O4 |

| Compound Label      | m/z      | RT    | Algorithm       | Mass     |
|---------------------|----------|-------|-----------------|----------|
| Cpd 1: C15 H15 N O4 | 296.0897 | 0.128 | Find By Formula | 273.1004 |

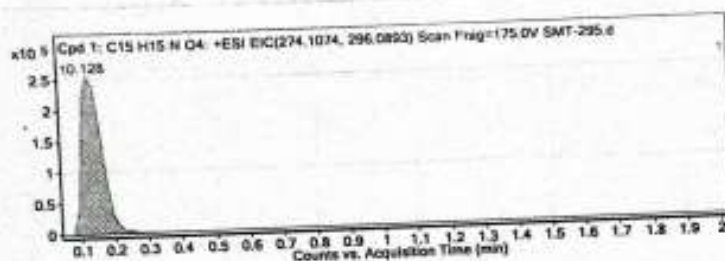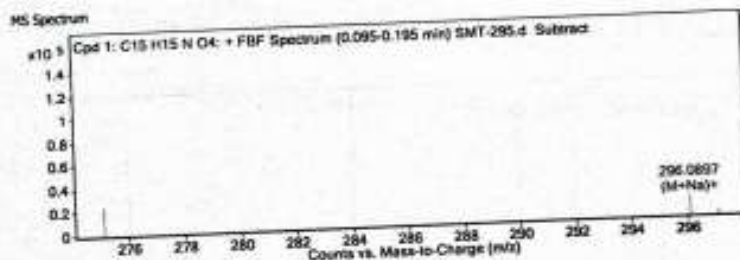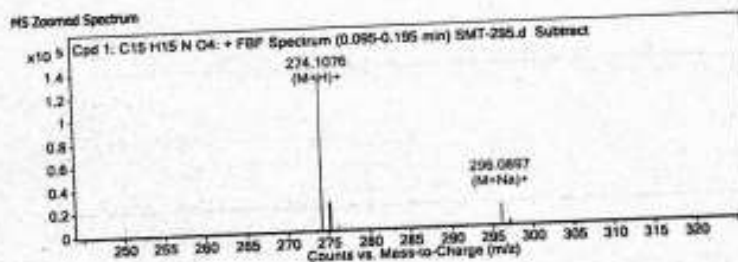

### MS Spectrum Peak List

| m/z      | # | Abund     | Formula     | Ion     |
|----------|---|-----------|-------------|---------|
| 274.1076 | 1 | 130911.44 | C15H16NO4   | (M+H)+  |
| 275.1111 | 1 | 23900.21  | C15H16NO4   | (M+H)+  |
| 296.0897 | 1 | 16527.8   | C15H15NNaO4 | (M+Na)+ |
| 297.0923 | 1 | 3652.35   | C15H15NNaO4 | (M+Na)+ |
| 298.0961 | 1 | 941.86    | C15H15NNaO4 | (M+Na)+ |

--- End Of Report ---

<sup>1</sup>H NMR spectrum of 4d (400 MHz, CDCl<sub>3</sub>)  
S 214

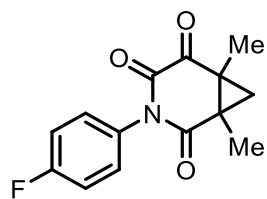

3-(4-fluorophenyl)-1,6-dimethyl-3-azabicyclo[4.1.0]heptane-2,4,5-trione

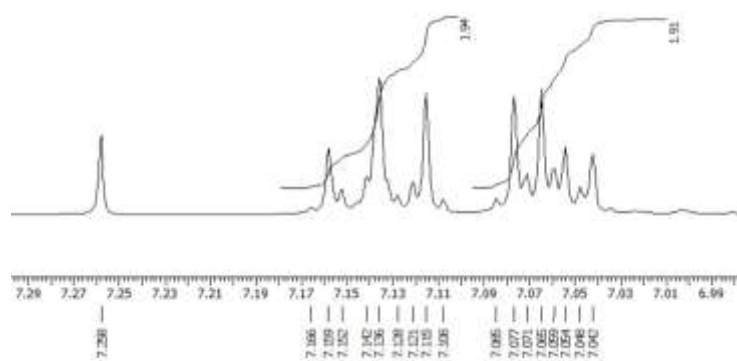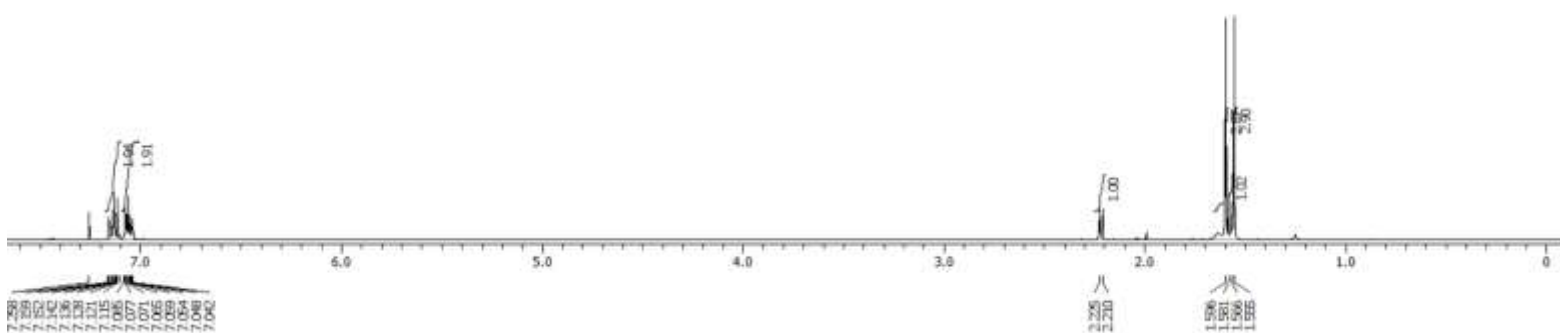

<sup>13</sup>C NMR spectrum of 4d (100 MHz, CDCl<sub>3</sub>)



3-(4-fluorophenyl)-1,6-dimethyl-3-azabicyclo[4.1.0]heptane-2,4,5-trione

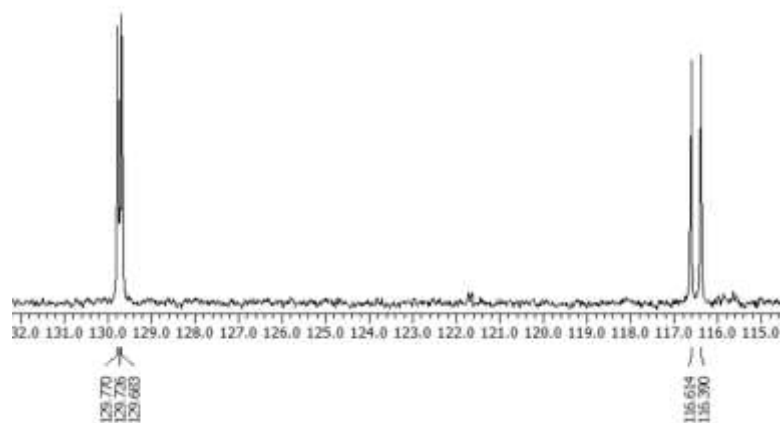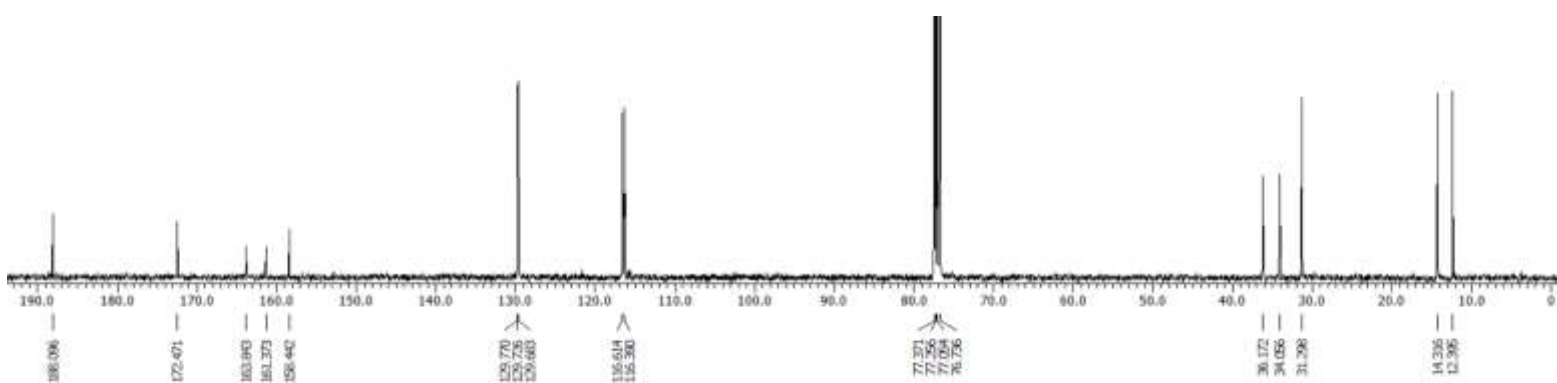

<sup>19</sup>F NMR spectrum of 4d (MHz, CDCl<sub>3</sub>)



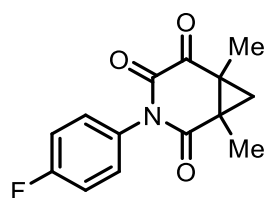

3-(4-fluorophenyl)-1,6-dimethyl-3-azabicyclo[4.1.0]heptane-2,4,5-trione

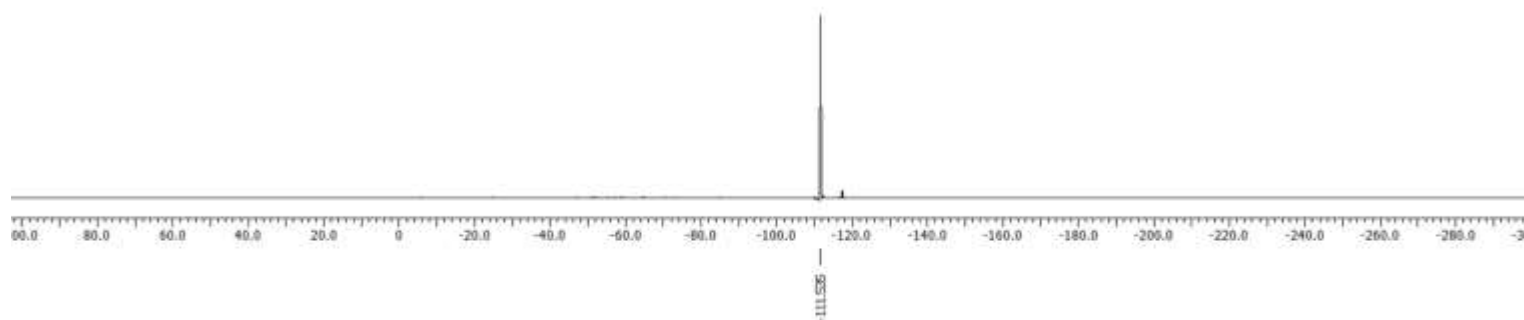

**HRMS spectrum of 4d**

|                    |                 |                               |         |                        |                                 |
|--------------------|-----------------|-------------------------------|---------|------------------------|---------------------------------|
| <b>Sample Name</b> | SMT 307         | <b>Position</b>               | P1-A4   | <b>Instrument Name</b> | BIOQTOF                         |
| <b>User Name</b>   | SYSTEM (SYSTEM) | <b>Inj Vol</b>                | 1       | <b>InjPosition</b>     |                                 |
| <b>Sample Type</b> | Sample          | <b>IRM Calibration Status</b> | Success | <b>Data Filename</b>   | SMT 307.d                       |
| <b>ACQ Method</b>  | Pos_100ACN.m    | <b>Comment</b>                |         | <b>Acquired Time</b>   | 27-04-2024 11:52:31 (UTC+05:30) |

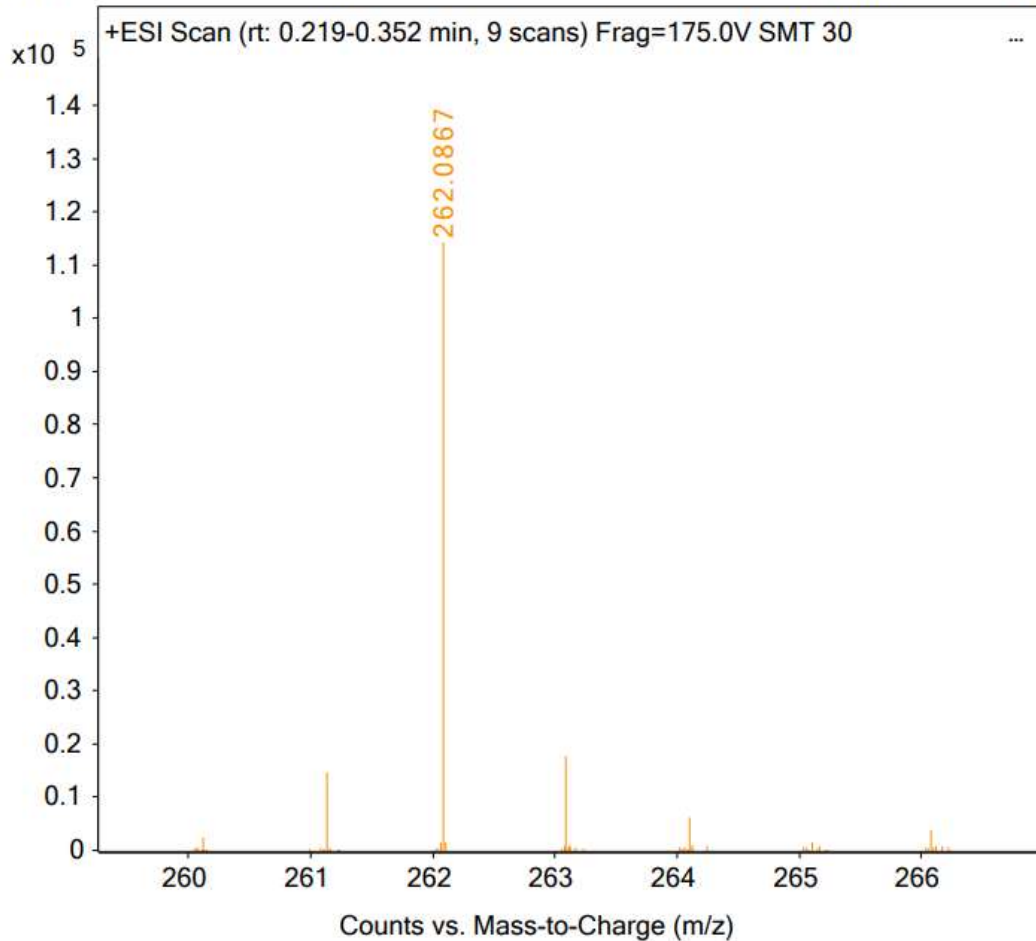

**<sup>1</sup>H NMR spectrum of 4e (400 MHz, CDCl<sub>3</sub>)**

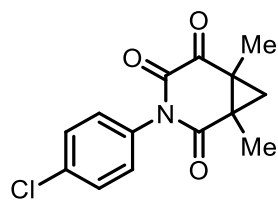

3-(4-chlorophenyl)-1,6-dimethyl-3-azabicyclo[4.1.0]heptane-2,4,5-trione

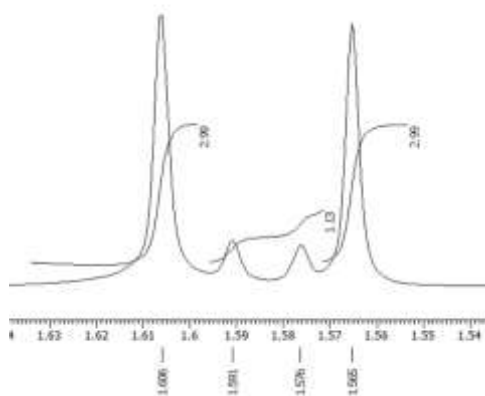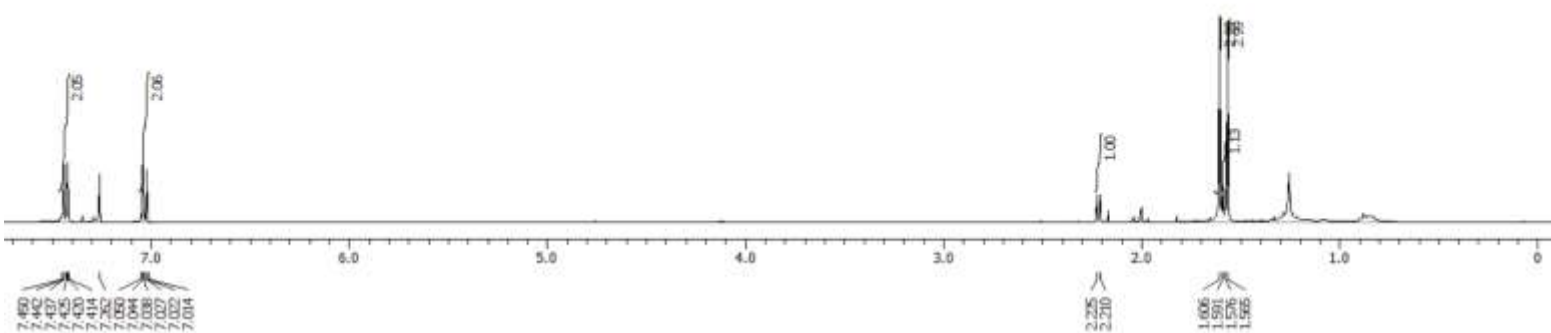

$^{13}\text{C}$  NMR spectrum of 4e (100 MHz,  $\text{CDCl}_3$ )

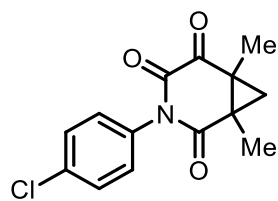

3-(4-chlorophenyl)-1,6-dimethyl-3-azabicyclo[4.1.0]heptane-2,4,5-trione

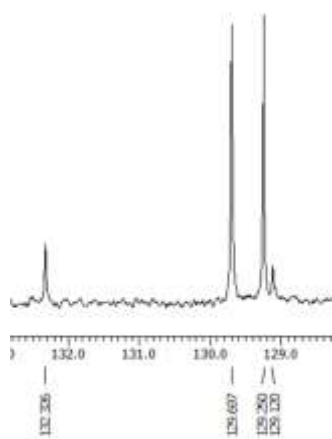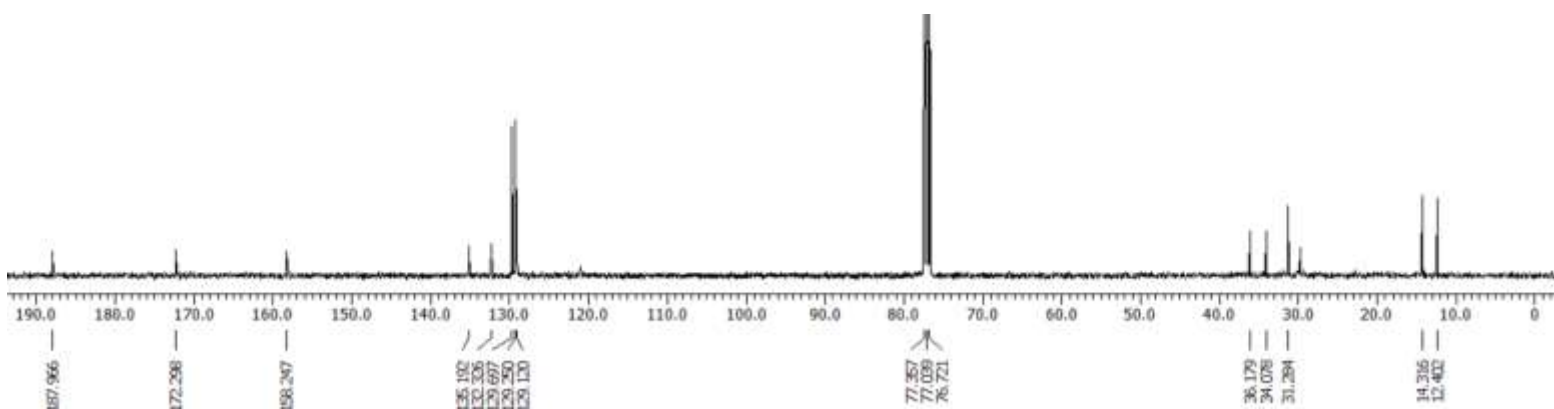

HRMS spectrum of 4e

## Qualitative Compound Report

|                        |              |               |                     |
|------------------------|--------------|---------------|---------------------|
| Data File              | SMT-308.d    | Sample Name   | SMT-308             |
| Sample Type            | Sample       | Position      | P1-B5               |
| Instrument Name        | Instrument 1 | User Name     |                     |
| Acq Method             | MS Scan.m    | Acquired Time | 23-08-2023 13:45:12 |
| IRM Calibration Status |              | DA Method     | Default.m           |
| Comment                |              |               |                     |

|                |                             |   |
|----------------|-----------------------------|---|
| Sample Group   | Info.                       | 3 |
| Acquisition SW | 6200 series TOF/6500 series |   |
| Version        | Q-TOF B.05.01 (B5125)       |   |

### Compound Table

| Compound Label          | RT    | Mass     | Formula         | MFG Formula     | MFG Diff (ppm) | DB Formula      |
|-------------------------|-------|----------|-----------------|-----------------|----------------|-----------------|
| Cpd 23: C14 H12 Cl N O3 | 0.127 | 277.0513 | C14 H12 Cl N O3 | C14 H12 Cl N O3 | -2.54          | C14 H12 Cl N O3 |

| Compound Label          | m/z      | RT    | Algorithm                 | Mass     |
|-------------------------|----------|-------|---------------------------|----------|
| Cpd 23: C14 H12 Cl N O3 | 278.0587 | 0.127 | Find by Molecular Feature | 277.0513 |

### MFE MS Spectrum

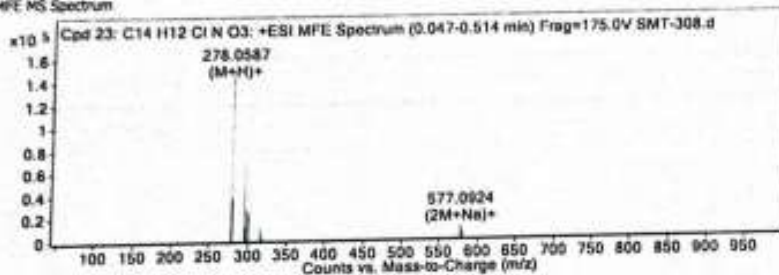

### MFE MS Zoomed Spectrum

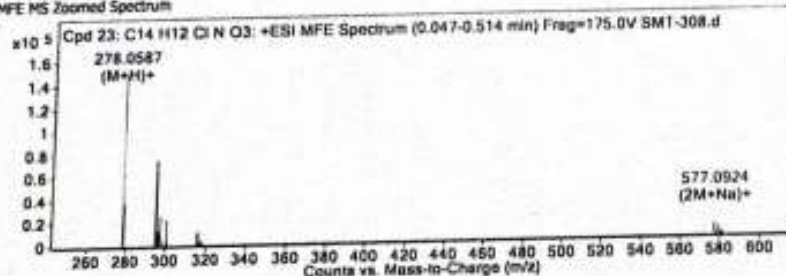

### MS Spectrum Peak List

| m/z      | # | Abund     | Formula              | Ion      |
|----------|---|-----------|----------------------|----------|
| 278.0587 | 1 | 148156.91 |                      | (M+H)+   |
| 279.0634 | 1 | 37340.95  |                      | (M+H)+   |
| 295.0852 | 1 | 70381.17  | C14 H16 Cl N2 O3     | (M+NH)+  |
| 296.087  | 1 | 12641.83  | C14 H16 Cl N2 O3     | (M+NH)+  |
| 297.0829 | 1 | 26971.41  | C14 H16 Cl N2 O3     | (M+NH)+  |
| 298.0853 | 1 | 5620.01   | C14 H16 Cl N2 O3     | (M+NH)+  |
| 299.0902 | 1 | 723.27    | C14 H16 Cl N2 O3     | (M+NH)+  |
| 300.0406 | 1 | 23512.27  |                      | (M+Na)+  |
| 301.0435 | 1 | 3353.12   |                      | (M+Na)+  |
| 316.0146 | 1 | 10270.66  | C14 H12 Cl K N O3    | (M+K)+   |
| 317.0182 | 1 | 1736.83   | C14 H12 Cl K N O3    | (M+K)+   |
| 318.0169 | 1 | 4382.6    | C14 H12 Cl K N O3    | (M+K)+   |
| 319.0227 | 1 | 921.47    | C14 H12 Cl K N O3    | (M+K)+   |
| 572.1319 | 1 | 701.37    |                      | (2M+NH)+ |
| 577.0924 | 1 | 10346.55  | C28 H24 Cl2 N2 Na O6 | (2M+Na)+ |

<sup>1</sup>H NMR spectrum of 4f (400 MHz, CDCl<sub>3</sub>)

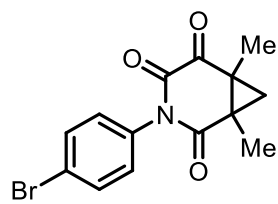

3-(4-bromophenyl)-1,6-dimethyl-3-azabicyclo[4.1.0]heptane-2,4,5-trione

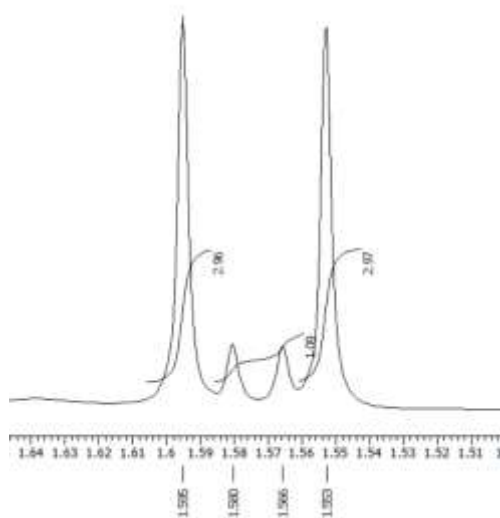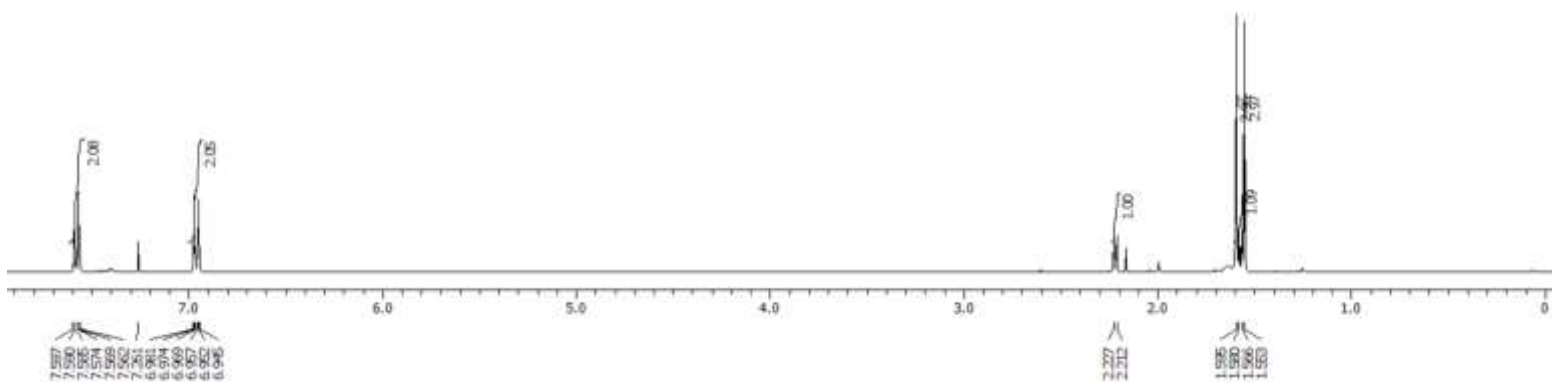

<sup>13</sup>C NMR spectrum of 4f (100 MHz, CDCl<sub>3</sub>)

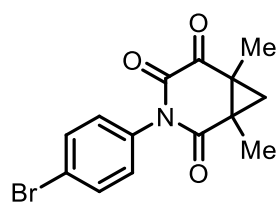

3-(4-bromophenyl)-1,6-dimethyl-3-azabicyclo[4.1.0]heptane-2,4,5-trione

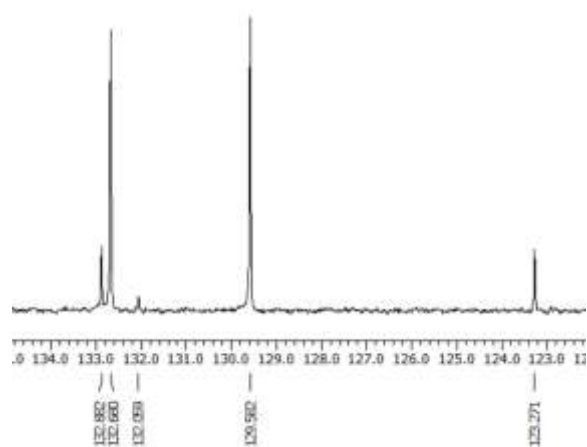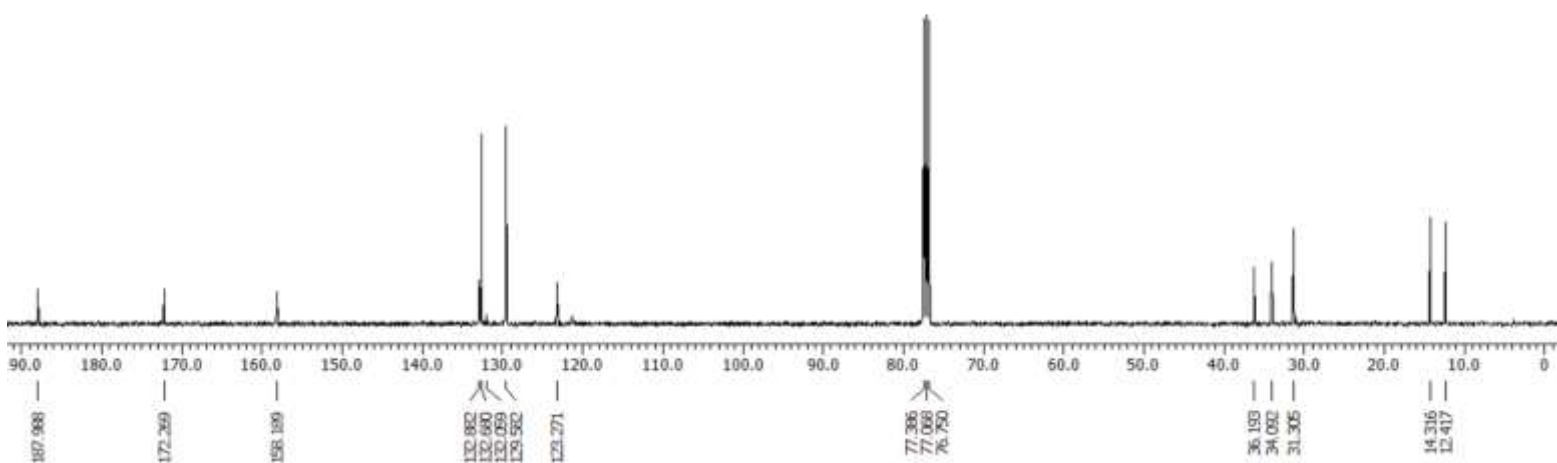

# HRMS spectrum of 4f

## Qualitative Compound Report

|                        |              |               |                     |
|------------------------|--------------|---------------|---------------------|
| Data File              | SMT-328.d    | Sample Name   | SMT-328             |
| Sample Type            | Sample       | Position      | P1-08               |
| Instrument Name        | Instrument 1 | User Name     |                     |
| Acq Method             | MS Scan.m    | Acquired Time | 16-09-2023 13:19:52 |
| IRN Calibration Status | Success      | DA Method     | Default.n           |
| Comment                |              |               |                     |

|                |                             |   |
|----------------|-----------------------------|---|
| Sample Group   | Info.                       | 3 |
| Acquisition SW | 6200 series TOF/MS00 series |   |
| Version        | Q-TOF B.05.01 (85125)       |   |

### Compound Table

| Compound Label         | RT   | Mass     | Abund | Formula         | Tgt Mass | Diff (ppm) | MFG Formula     | DB Formula      |
|------------------------|------|----------|-------|-----------------|----------|------------|-----------------|-----------------|
| Cpd 1: C14 H12 Br N O3 | 0.13 | 321.0006 | 1825  | C14 H12 Br N O3 | 321.0001 | 1.83       | C14 H12 Br N O3 | C14 H12 Br N O3 |

| Compound Label         | m/z      | RT   | Algorithm       | Mass     |
|------------------------|----------|------|-----------------|----------|
| Cpd 1: C14 H12 Br N O3 | 345.9887 | 0.13 | Find By Formula | 321.0006 |

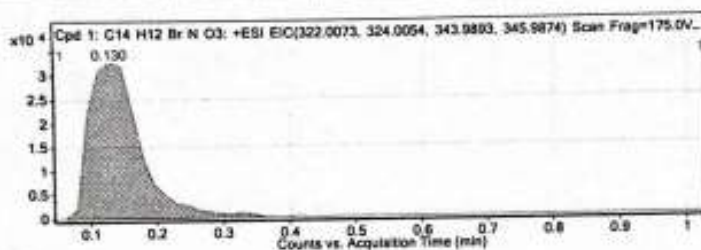

### MS Spectrum

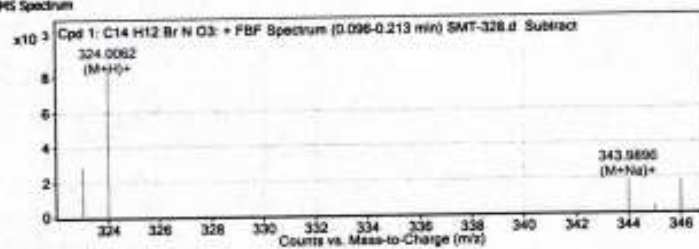

### MS Zoomed Spectrum

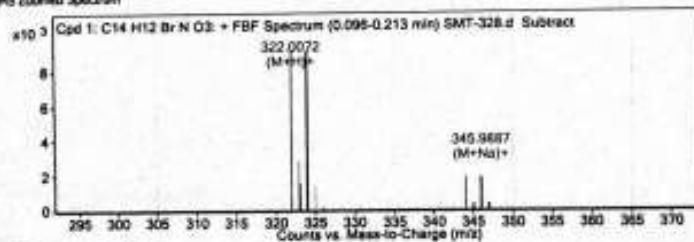

### MS Spectrum Peak List

| m/z      | x | Abund   | Formula       | Ion     |
|----------|---|---------|---------------|---------|
| 322.0072 | 1 | 8531.02 | C14H13BrNO3   | (M+H)+  |
| 323.0129 | 1 | 2835.48 | C14H13BrNO3   | (M+H)+  |
| 324.0062 | 1 | 8462.07 | C14H13BrNO3   | (M+H)+  |
| 343.9896 | 1 | 1785.15 | C14H12BrNNaO3 | (M+Na)+ |
| 344.9913 | 1 | 322.24  | C14H12BrNNaO3 | (M+Na)+ |
| 345.9887 | 1 | 1825.28 | C14H12BrNNaO3 | (M+Na)+ |
| 346.9891 | 1 | 360.57  | C14H12BrNNaO3 | (M+Na)+ |

--- End Of Report ---



<sup>1</sup>H NMR spectrum of 4g (400 MHz, CDCl<sub>3</sub>)

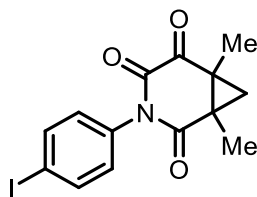

3-(4-iodophenyl)-1,6-dimethyl-3-azabicyclo[4.1.0]heptane-2,4,5-trione

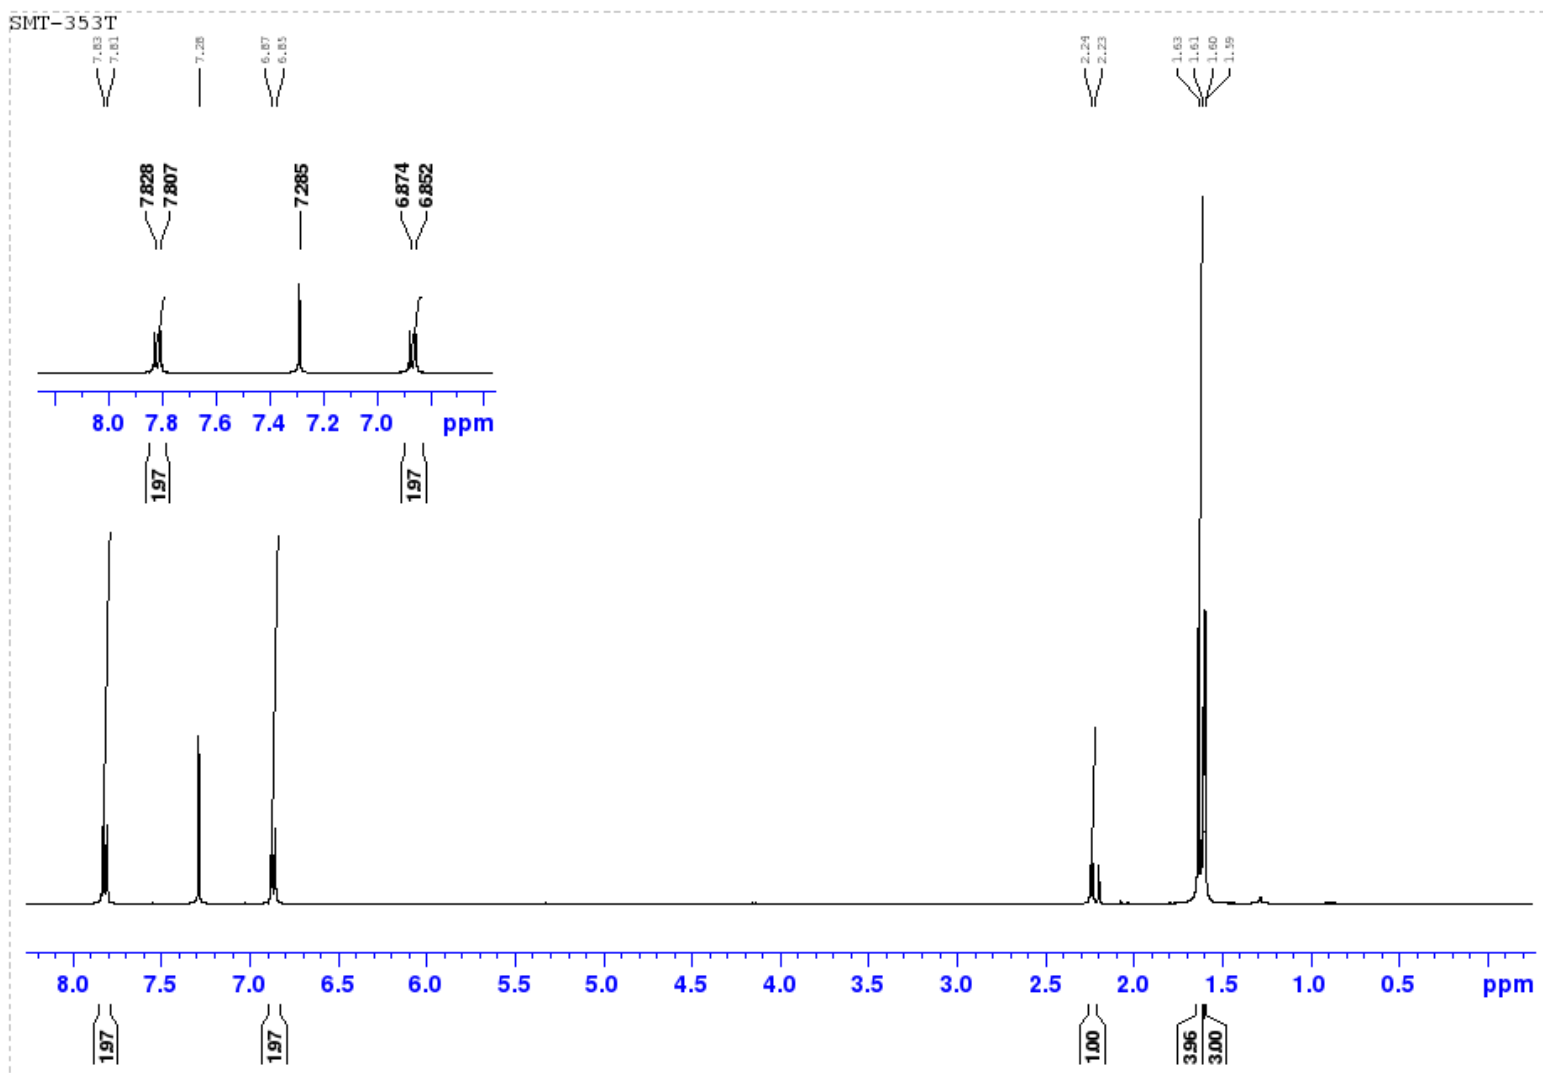

<sup>13</sup>C NMR spectrum of 4g (100 MHz, CDCl<sub>3</sub>)



3-(4-iodophenyl)-1,6-dimethyl-3-azabicyclo[4.1.0]heptane-2,4,5-trione

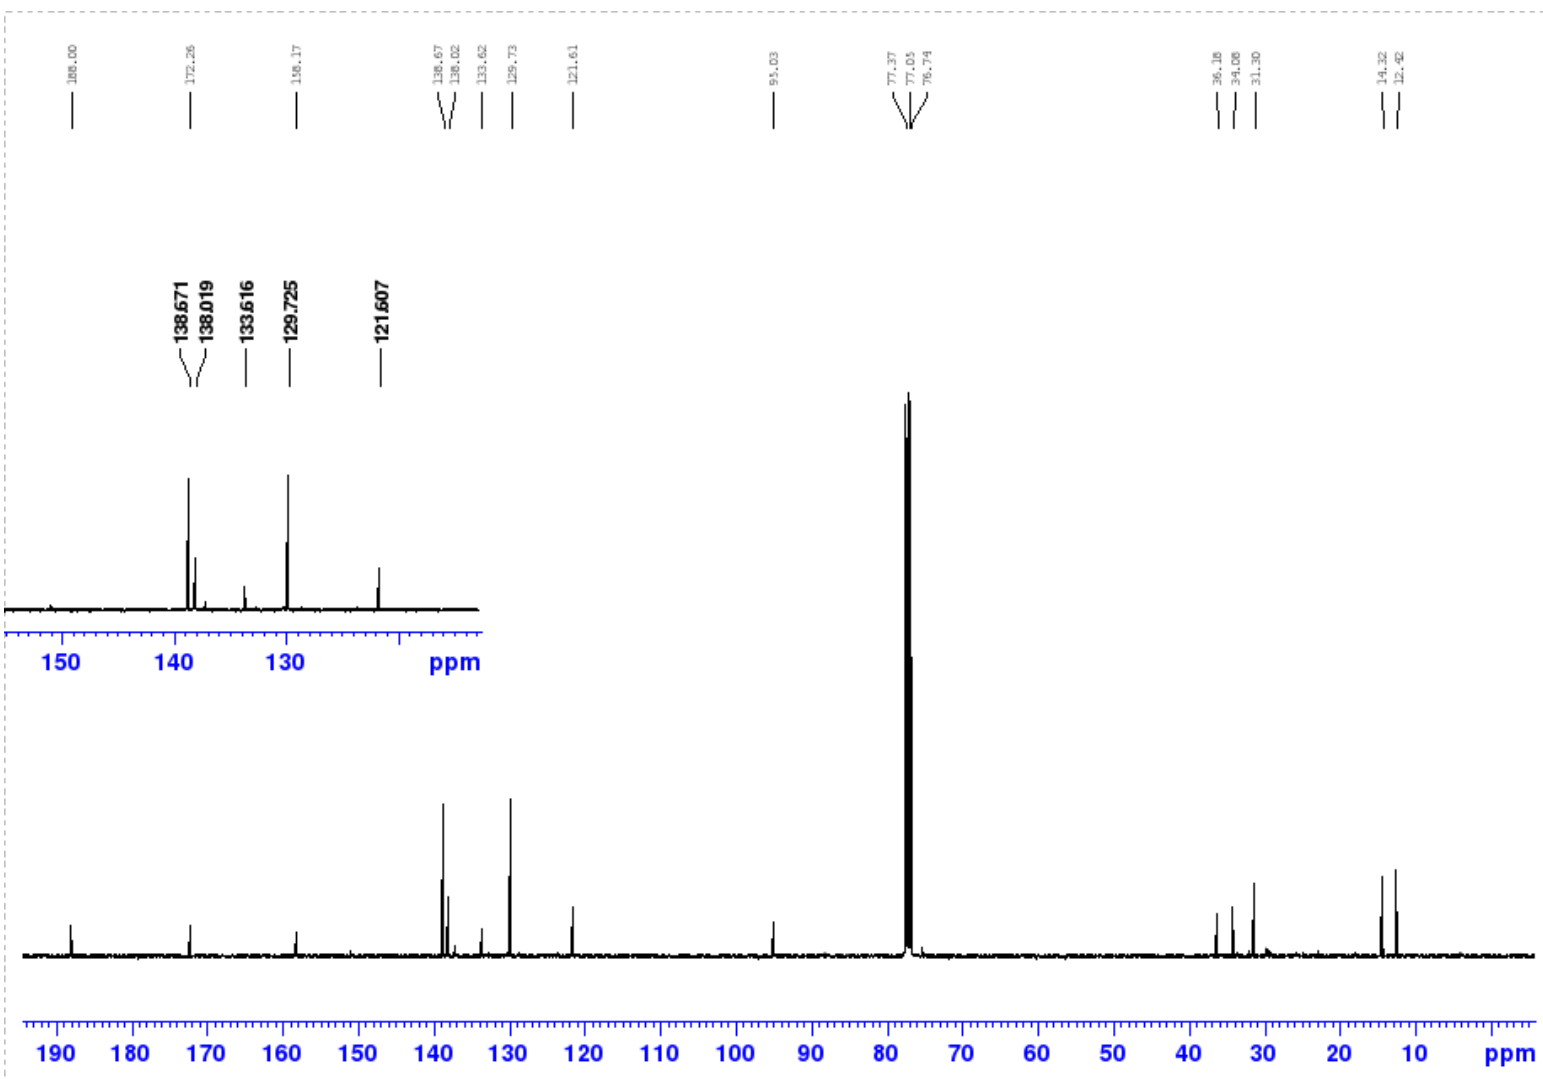

# HRMS spectrum of 4g

## Qualitative Compound Report

|                        |              |               |                     |
|------------------------|--------------|---------------|---------------------|
| Data File              | SMT-353.d    | Sample Name   | SMT-353             |
| Sample Type            | Sample       | Position      | P1-C2               |
| Instrument Name        | Instrument 1 | User Name     |                     |
| Acq Method             | MS Scan.m    | Acquired Time | 09-11-2023 14:13:05 |
| IRM Calibration Status |              | DA Method     | Default.m           |
| Comment                |              |               |                     |

Sample Group: Info, 3  
 Acquisition SW: 6200 series TOF/6500 series  
 Version: Q-TOF 8.05.01 (85125)

### Compound Table

| Compound Label        | RT   | Mass     | Abund | Formula        | Tgt Mass | Diff (ppm) | MPG Formula    | DB Formula     |
|-----------------------|------|----------|-------|----------------|----------|------------|----------------|----------------|
| Cpd 1: C14 H12 I N O3 | 0.13 | 368.9869 | 7382  | C14 H12 I N O3 | 368.9862 | 2.06       | C14 H12 I N O3 | C14 H12 I N O3 |

| Compound Label        | m/z      | RT   | Algorithm       | Mass     |
|-----------------------|----------|------|-----------------|----------|
| Cpd 1: C14 H12 I N O3 | 391.9757 | 0.13 | Find By Formula | 368.9869 |

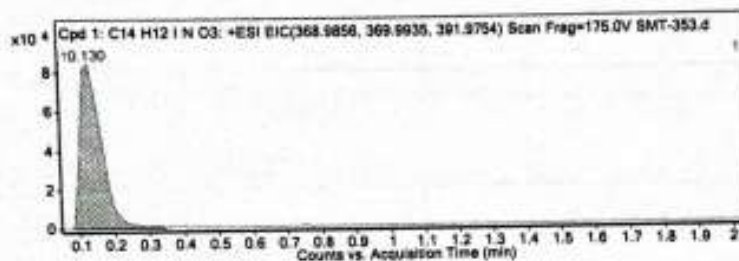

### MS Spectrum

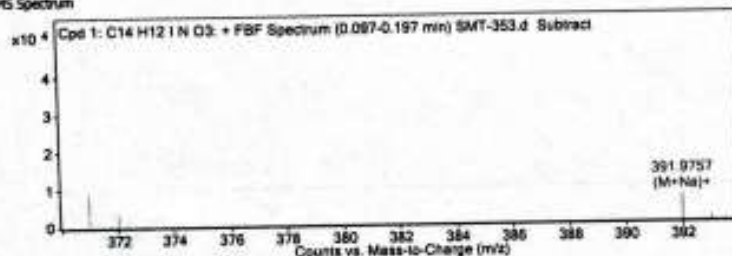

### MS Zoomed Spectrum

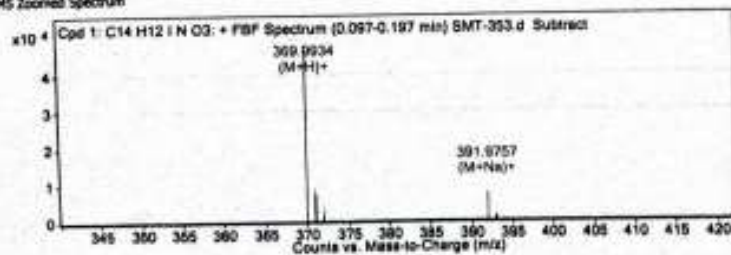

### MS Spectrum Peak List

| m/z      | z | Abund    | Formula     | Ion     |
|----------|---|----------|-------------|---------|
| 369.9934 | 1 | 41965.15 | C14H13INO3  | (M+H)+  |
| 370.998  | 1 | 8985.35  | C14H13INO3  | (M+H)+  |
| 372.0069 | 1 | 3598.12  | C14H13INO3  | (M+H)+  |
| 373.0125 | 1 | 991.35   | C14H13INO3  | (M+H)+  |
| 391.9757 | 1 | 7382.03  | C14H12INaO3 | (M+Na)+ |
| 392.9784 | 1 | 994      | C14H12INaO3 | (M+Na)+ |
| 393.9847 | 1 | 401.13   | C14H12INaO3 | (M+Na)+ |

--- End Of Report ---

<sup>1</sup>H NMR spectrum of 4h (400 MHz, CDCl<sub>3</sub>)

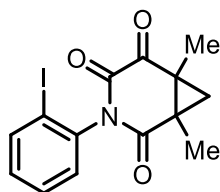

3-(2-iodophenyl)-1,6-dimethyl-3-azabicyclo[4.1.0]heptane-2,4,5-trione

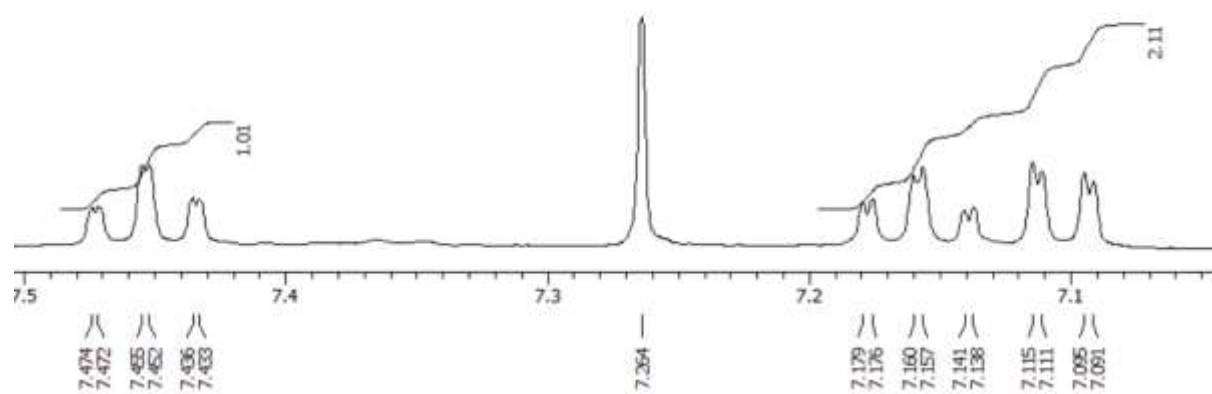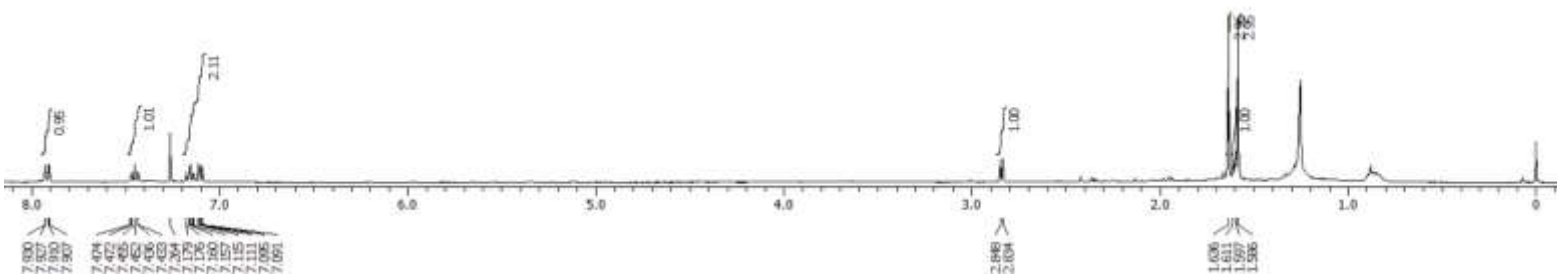

<sup>13</sup>C NMR spectrum of 4h (100 MHz, CDCl<sub>3</sub>)

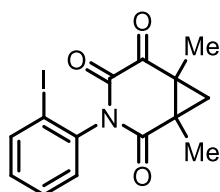

3-(2-iodophenyl)-1,6-dimethyl-3-azabicyclo[4.1.0]heptane-2,4,5-trione

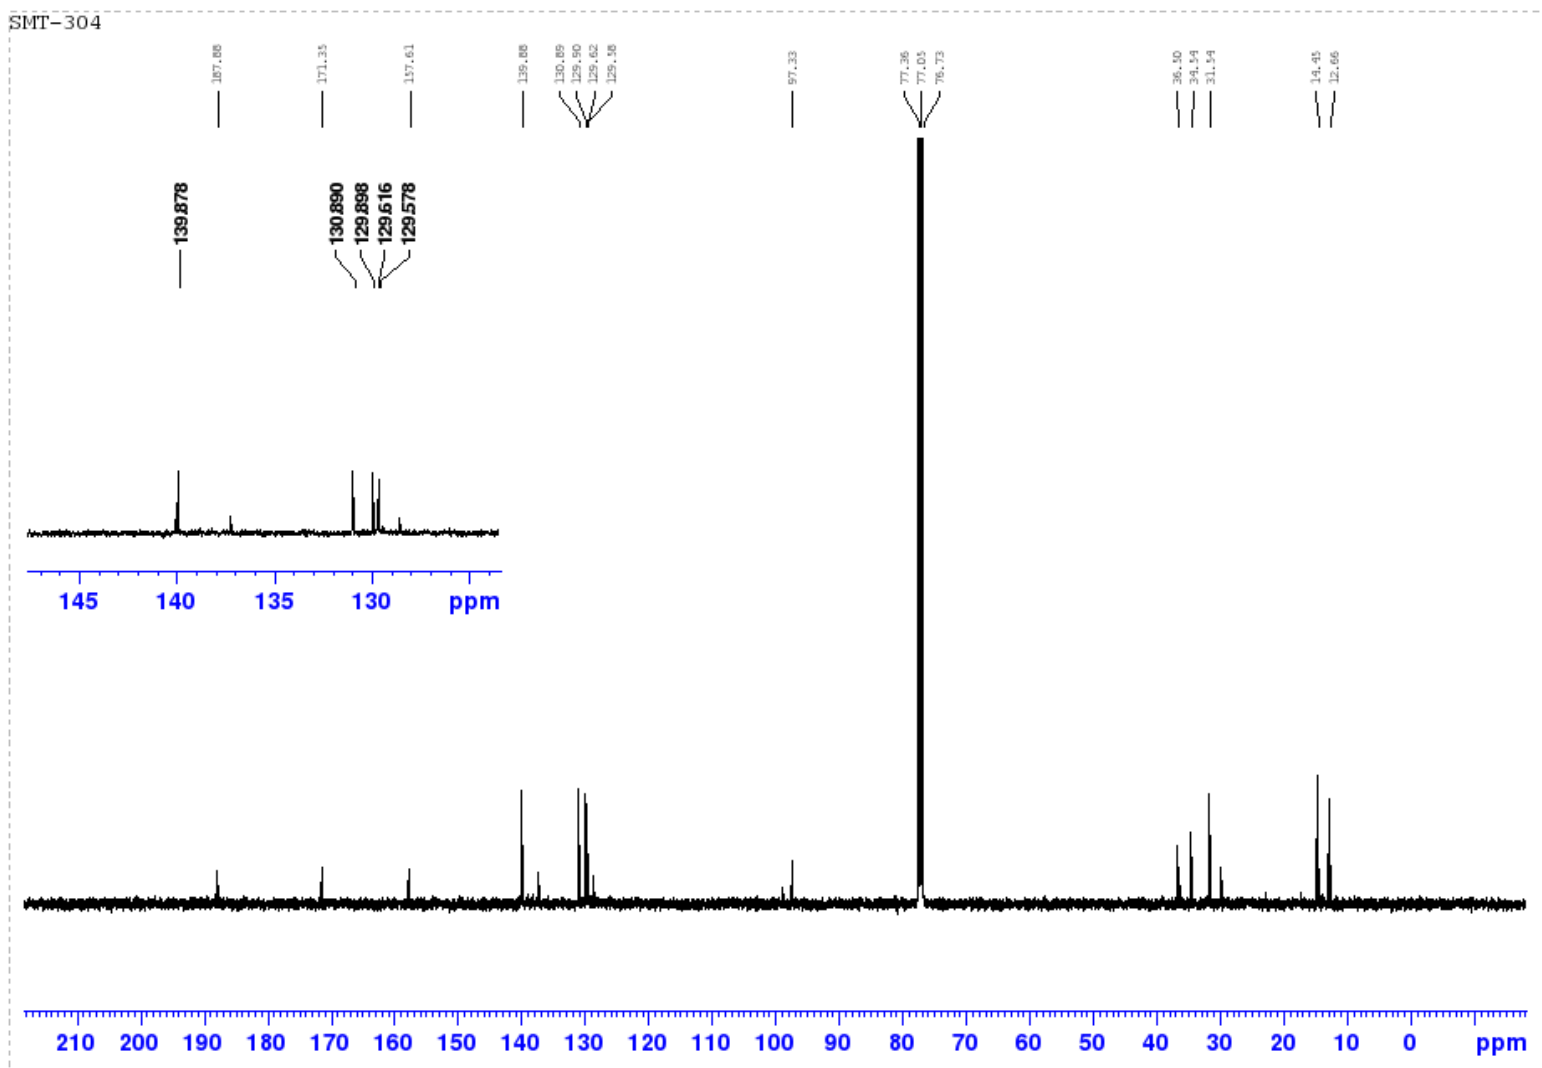

# HRMS spectrum of 4h

## Qualitative Compound Report

Data File: SMT-304.d      Sample Name: SMT-304  
 Sample Type: Sample      Position: PL-A5  
 Instrument Name: Instrument 1      User Name:  
 Acq Method: MS Scan.m      Acquired Time: 17-08-2023 12:59:00  
 IRM Calibration Status:      DA Method: Default.m  
 Comment:

Sample Group:      Info: 3  
 Acquisition SW: 6200 series TOF/6500 series  
 Version: Q-TOF 8.05.01 (85125)

### Compound Table

| Compound Label        | RT    | Mass     | Abund | Formula        | Tgt Mass | Diff (ppm) | MFG Formula    | DB Formula     |
|-----------------------|-------|----------|-------|----------------|----------|------------|----------------|----------------|
| Cpd 1: C14 H12 I N O3 | 0.133 | 368.9878 | 64517 | C14 H12 I N O3 | 368.9867 | 4.47       | C14 H12 I N O3 | C14 H12 I N O3 |

Compound Label: Cpd 1: C14 H12 I N O3  
 m/z: 369.9946      RT: 0.133      Algorithm: Find by Formula      Mass: 368.9878

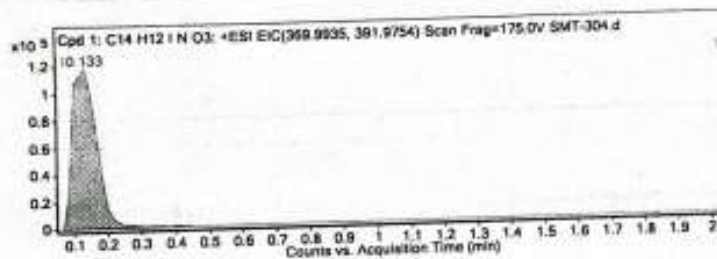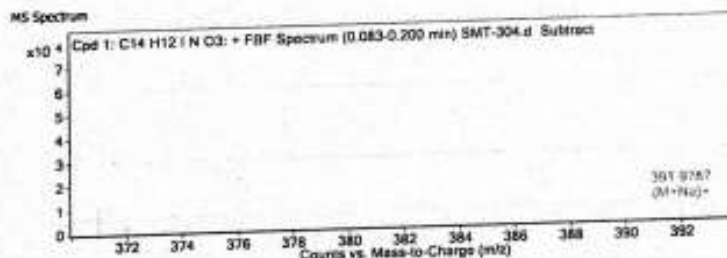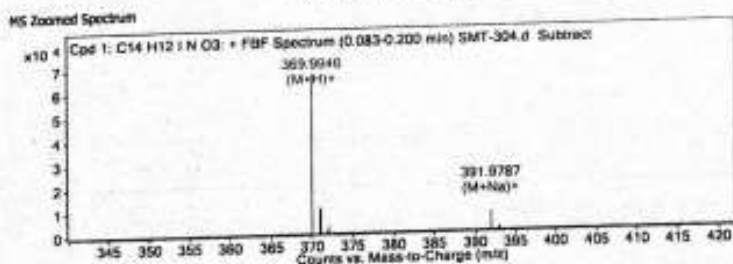

### MS Spectrum Peak List

| m/z      | z | Abund    | Formula      | Ion     |
|----------|---|----------|--------------|---------|
| 369.9946 | 1 | 64517.24 | C14H13INO3   | (M+H)+  |
| 370.9978 | 1 | 10397.83 | C14H13INO3   | (M+H)+  |
| 372.0009 | 1 | 3402.96  | C14H13INO3   | (M+H)+  |
| 373.0123 | 1 | 517.55   | C14H13INO3   | (M+H)+  |
| 391.9787 | 1 | 7187.47  | C14H12INNaO3 | (M+Na)+ |
| 392.9811 | 1 | 1207.37  | C14H12INNaO3 | (M+Na)+ |
| 393.9873 | 1 | 555.94   | C14H12INNaO3 | (M+Na)+ |

-- End Of Report --

<sup>1</sup>H NMR spectrum of 4i (400 MHz, CDCl<sub>3</sub>)

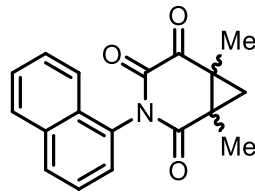

1,6-dimethyl-3-(naphthalen-1-yl)-3-azabicyclo[4.1.0]heptane-2,4,5-trione (*dr* 1:1)

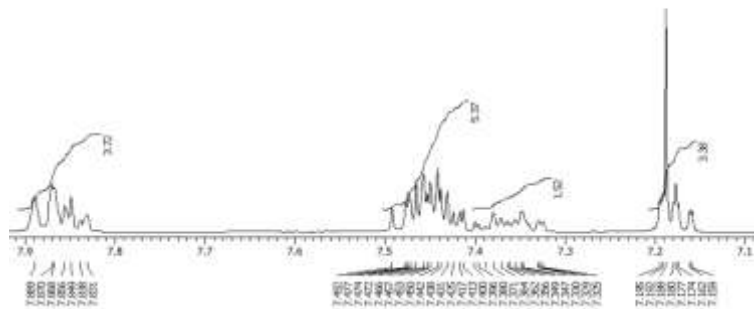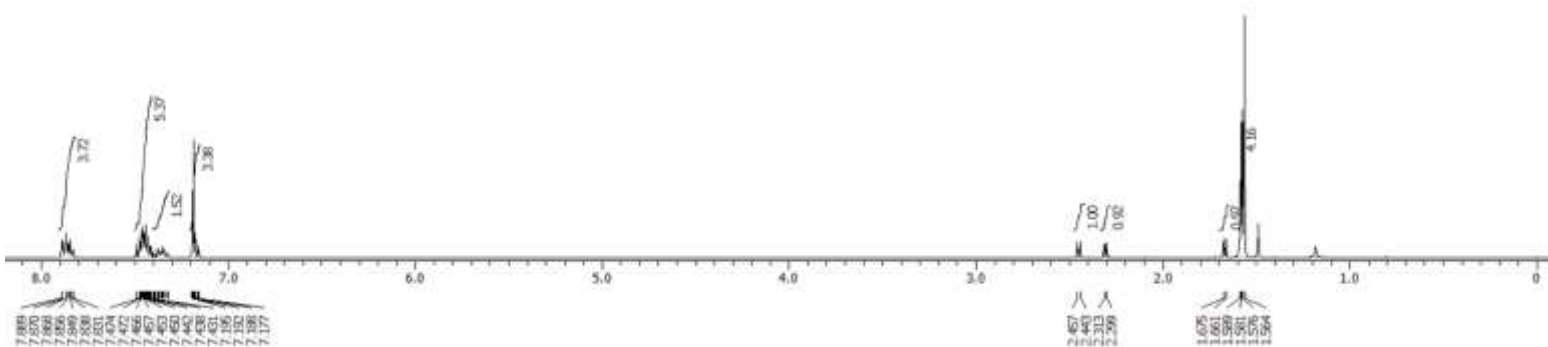

<sup>13</sup>C NMR spectrum of 4i (100 MHz, CDCl<sub>3</sub>)



1,6-dimethyl-3-(naphthalen-1-yl)-3-azabicyclo[4.1.0]heptane-2,4,5-trione (*dr* 1:1)

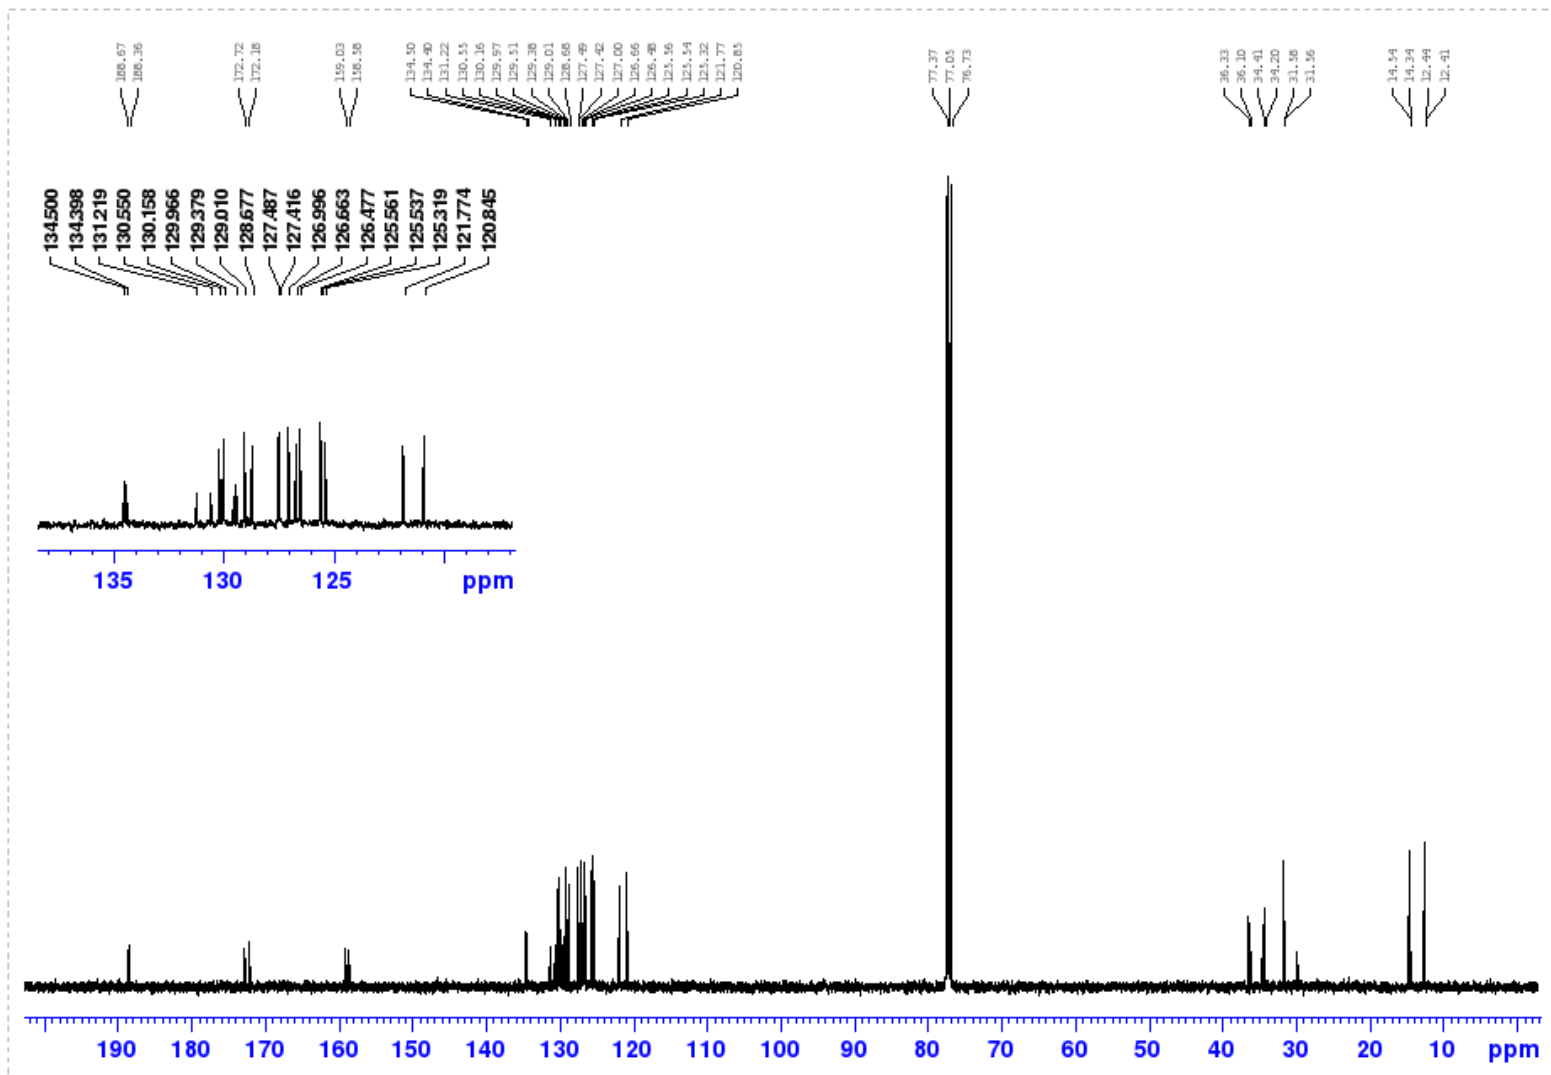



# HRMS spectrum of 4i

## Qualitative Compound Report

|                       |              |               |                     |
|-----------------------|--------------|---------------|---------------------|
| Data File             | SMT-317.d    | Sample Name   | SMT-317             |
| Sample Type           | Sample       | Position      | P1-91               |
| Instrument Name       | Instrument 1 | User Name     |                     |
| Acq Method            | MS Scan.m    | Acquired Time | 08-11-2023 14:40:20 |
| DB Calibration Status |              | DA Method     | Default.m           |
| Comment               |              |               |                     |

|                |                             |   |  |
|----------------|-----------------------------|---|--|
| Sample Group   | Info.                       | 3 |  |
| Acquisition SW | 6200 series TOF/6500 series |   |  |
| Version        | Q-TOF 8.05.01 (85125)       |   |  |

### Compound Table

| Compound Label      | RT    | Mass     | Abund  | Formula      | Tgt Mass | Diff (ppm) | MPG Formula  | DB Formula   |
|---------------------|-------|----------|--------|--------------|----------|------------|--------------|--------------|
| Cpd 1: C18 H15 N O3 | 0.127 | 293.1058 | 336310 | C18 H15 N O3 | 293.1052 | 1.97       | C18 H15 N O3 | C18 H15 N O3 |

| Compound Label      | m/z      | RT    | Algorithm       | Mass     |
|---------------------|----------|-------|-----------------|----------|
| Cpd 1: C18 H15 N O3 | 294.1129 | 0.127 | Find By Formula | 293.1058 |

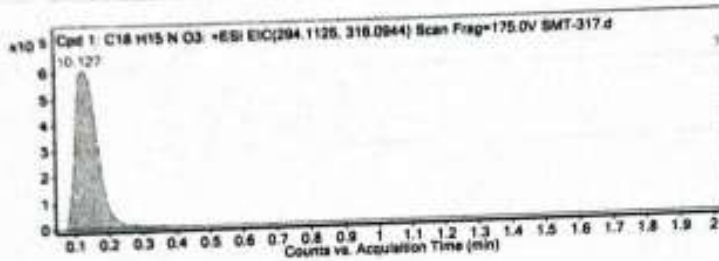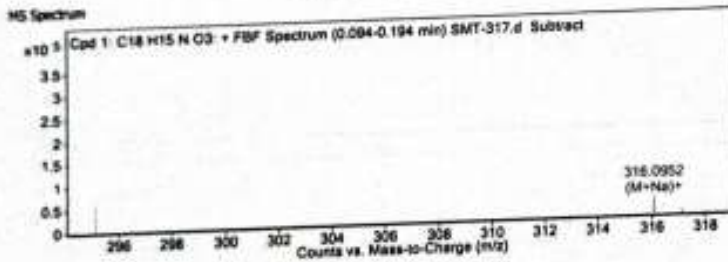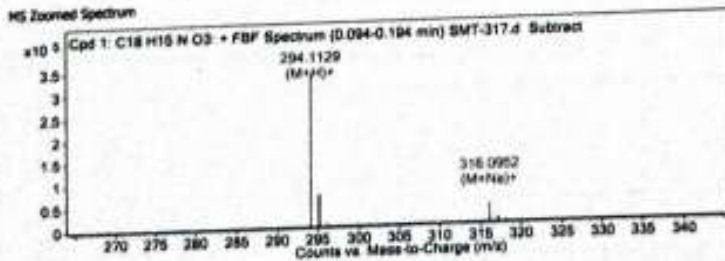

### MS Spectrum Peak List

| m/z      | # | Abund     | Formula     | Ion     |
|----------|---|-----------|-------------|---------|
| 294.1129 | 1 | 236309.97 | C18H15NO3   | (M+H)+  |
| 295.116  | 1 | 86659.52  | C18H15NO3   | (M+H)+  |
| 316.0952 | 1 | 38889.66  | C18H15NNaO3 | (M+Na)+ |
| 317.1024 | 1 | 9516.48   | C18H15NNaO3 | (M+Na)+ |
| 318.1081 | 1 | 2617.98   | C18H15NNaO3 | (M+Na)+ |
| 319.1103 | 1 | 483.31    | C18H15NNaO3 | (M+Na)+ |

--- End Of Report ---

<sup>1</sup>H NMR spectrum of 4j (400 MHz, CDCl<sub>3</sub>)

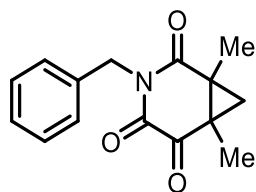

3-benzyl-1,6-dimethyl-3-azabicyclo[4.1.0]heptane-2,4,5-trione

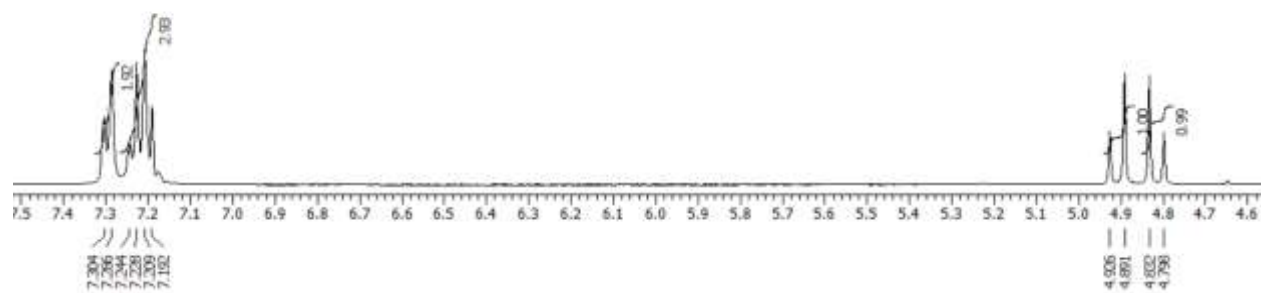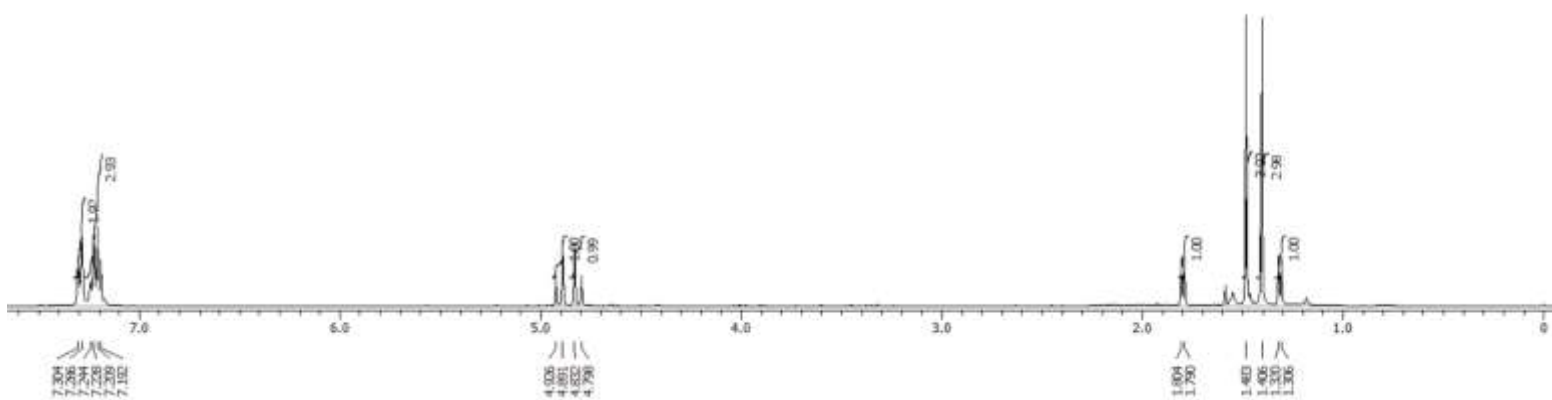

<sup>13</sup>C NMR spectrum of 4j (100 MHz, CDCl<sub>3</sub>)

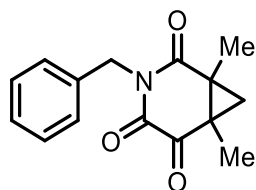

3-benzyl-1,6-dimethyl-3-azabicyclo[4.1.0]heptane-2,4,5-trione

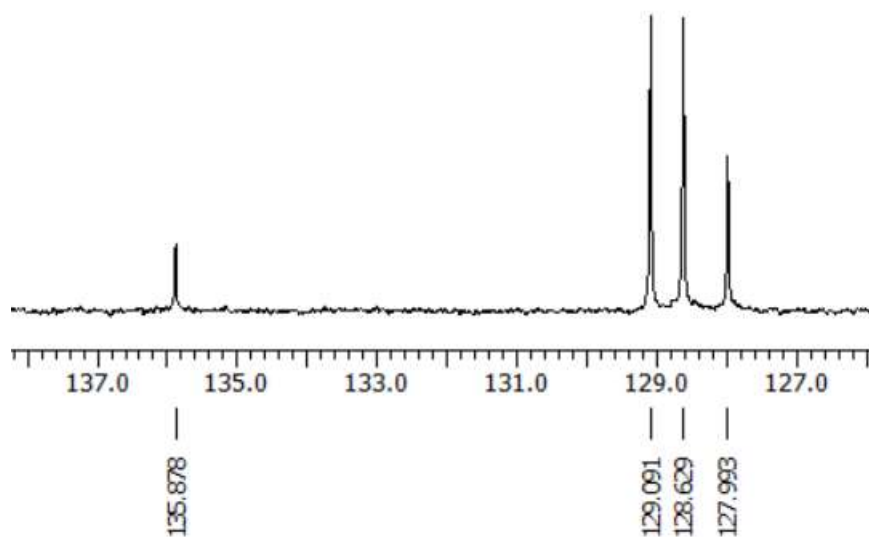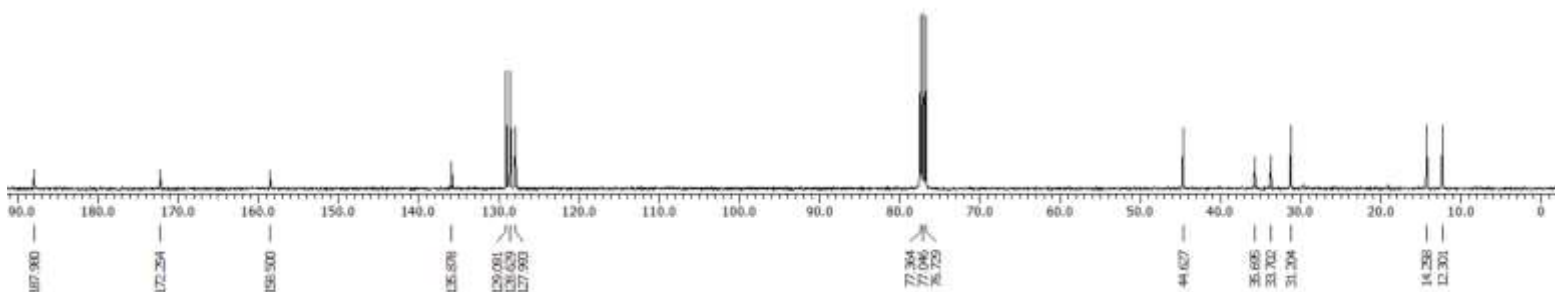

# HRMS spectrum of 4j

## Qualitative Compound Report

|                        |              |               |                     |
|------------------------|--------------|---------------|---------------------|
| Data File              | 379-A.d      | Sample Name   | 379-A               |
| Sample Type            | Sample       | Position      | P1-B7               |
| Instrument Name        | Instrument 1 | User Name     |                     |
| Acq Method             | MS Scan.m    | Acquired Time | 03-05-2024 13:39:48 |
| IRM Calibration Status | Success      | DA Method     | Default.m           |
| Comment                |              |               |                     |

|                |                             |   |  |
|----------------|-----------------------------|---|--|
| Sample Group   | Info.                       | 3 |  |
| Acquisition SW | 6200 series TOF/MS00 series |   |  |
| Version        | Q-TOF 8.05.01 (85125)       |   |  |

### Compound Table

| Compound Label      | RT    | Mass     | Abund | Formula      | Tgt Mass | Diff (ppm) | MFG Formula  | DB Formula   |
|---------------------|-------|----------|-------|--------------|----------|------------|--------------|--------------|
| Cpd 1: C15 H15 N O3 | 0.409 | 257.1067 | 4004  | C15 H15 N O3 | 257.1052 | 5.93       | C15 H15 N O3 | C15 H15 N O3 |

| Compound Label      | m/z      | RT    | Algorithm       | Mass     |
|---------------------|----------|-------|-----------------|----------|
| Cpd 1: C15 H15 N O3 | 280.0937 | 0.409 | Find By Formula | 257.1067 |

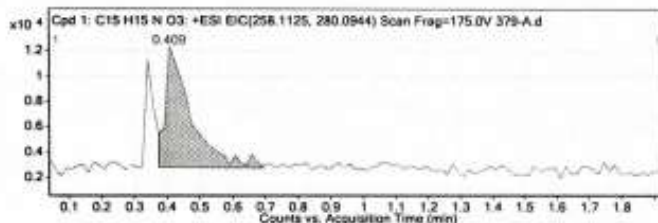

### MS Spectrum

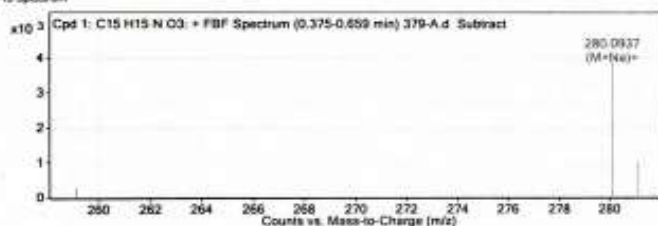

### MS Zoomed Spectrum

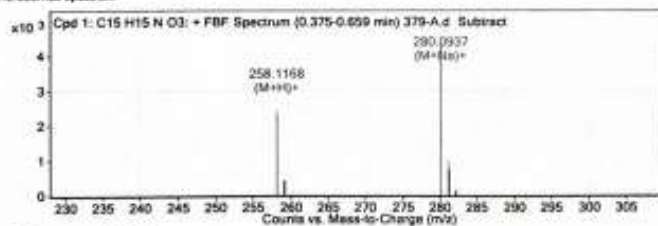

### MS Spectrum Peak List

| m/z      | # | Abund   | Formula     | Ion     |
|----------|---|---------|-------------|---------|
| 258.1168 | 1 | 2451.67 | C15H16NO3   | (M+H)+  |
| 259.1193 | 1 | 296.24  | C15H16NO3   | (M+H)+  |
| 280.0937 | 1 | 4003.77 | C15H15NNaO3 | (M+Na)+ |
| 281.0998 | 1 | 990.11  | C15H15NNaO3 | (M+Na)+ |
| 282.1063 | 1 | 204.34  | C15H15NNaO3 | (M+Na)+ |

--- End Of Report ---

<sup>1</sup>H NMR spectrum of 4k (400 MHz, CDCl<sub>3</sub>)

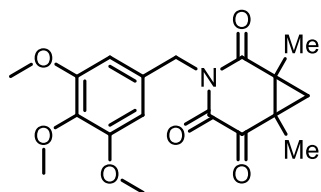

1,6-dimethyl-3-(3,4,5-trimethoxybenzyl)-3-azabicyclo[4.1.0]heptane-2,4,5-trione

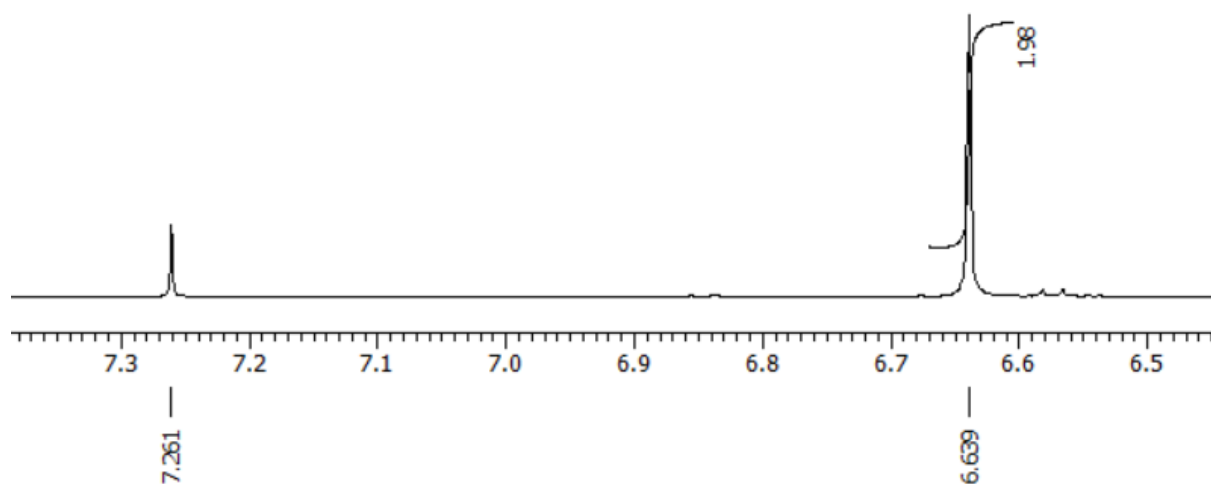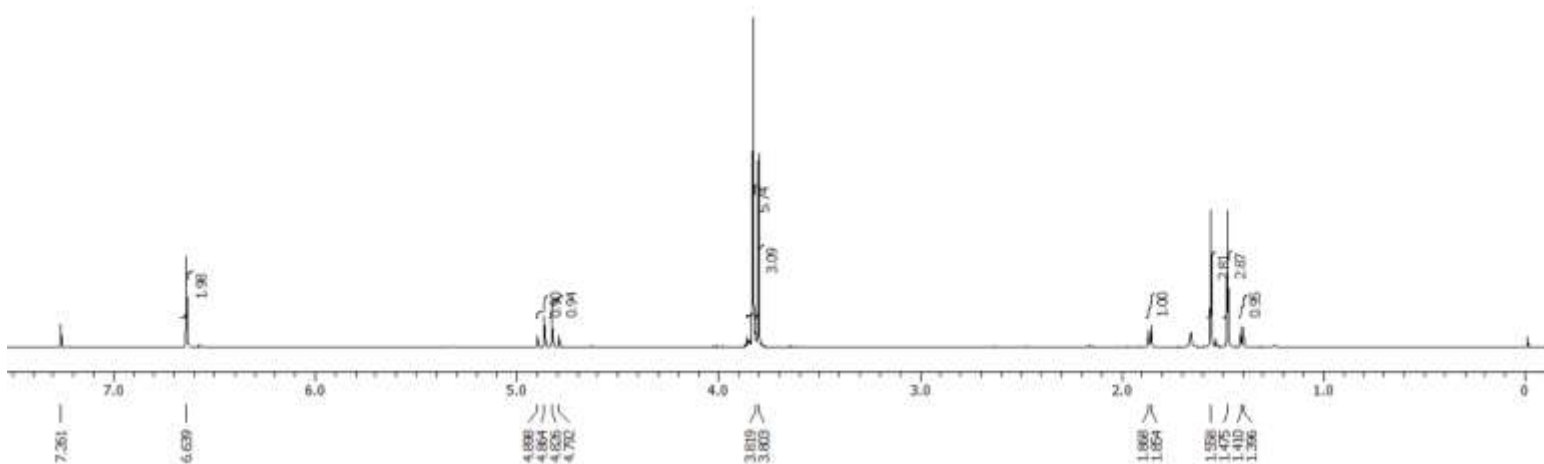

<sup>13</sup>C NMR spectrum of 4k (100 MHz, CDCl<sub>3</sub>)



1,6-dimethyl-3-(3,4,5-trimethoxybenzyl)-3-azabicyclo[4.1.0]heptane-2,4,5-trione

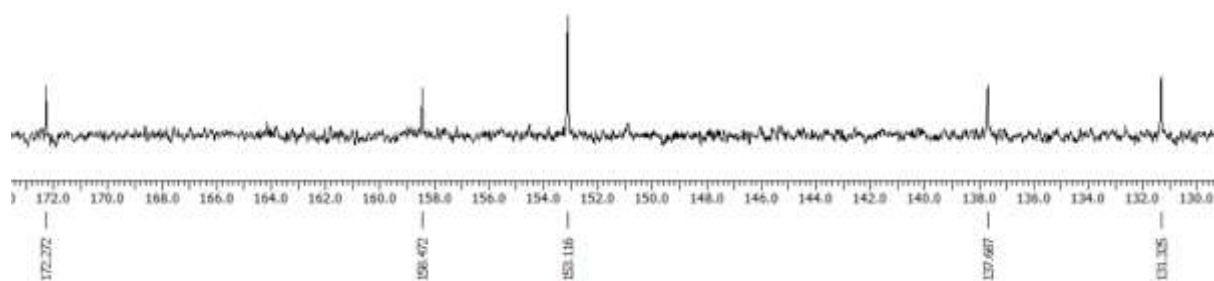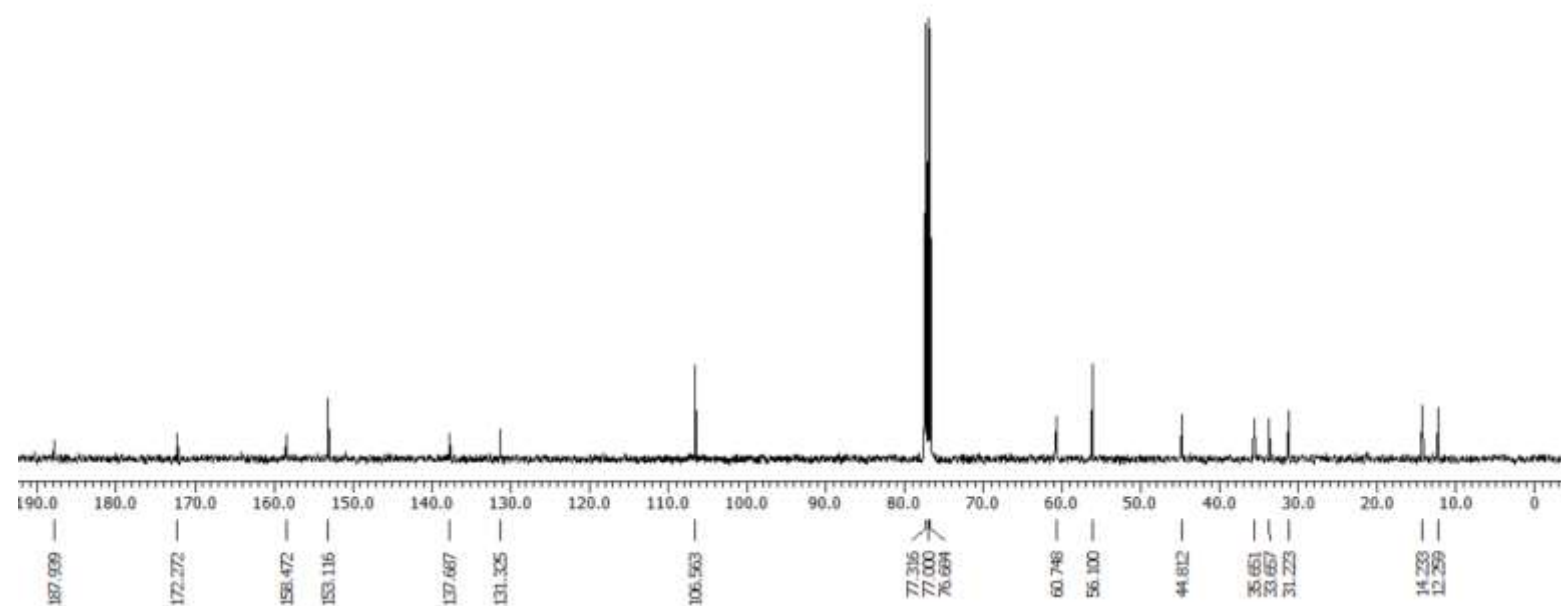

# HRMS spectrum of 4k

## Qualitative Compound Report

|                               |              |                      |                     |
|-------------------------------|--------------|----------------------|---------------------|
| <b>Data File</b>              | SMT-351.d    | <b>Sample Name</b>   | SMT-351             |
| <b>Sample Type</b>            | Sample       | <b>Position</b>      | P1-B2               |
| <b>Instrument Name</b>        | Instrument 1 | <b>User Name</b>     |                     |
| <b>Acq Method</b>             | MS Scan.m    | <b>Acquired Time</b> | 08-11-2023 14:44:10 |
| <b>IRM Calibration Status</b> |              | <b>DA Method</b>     | Default.m           |
| <b>Comment</b>                |              |                      |                     |

|                               |                                                    |              |   |
|-------------------------------|----------------------------------------------------|--------------|---|
| <b>Sample Group</b>           |                                                    | <b>Info.</b> | 3 |
| <b>Acquisition SW Version</b> | 6200 series TOF/6500 series Q-TOF 8.05.01 (951235) |              |   |

### Compound Table

| Compound Label      | RT    | Mass    | Abund  | Formula      | Tgt Mass | DMF (ppm) | MFG Formula  | DB Formula   |
|---------------------|-------|---------|--------|--------------|----------|-----------|--------------|--------------|
| Cpd 1: C18 H21 N O6 | 0.116 | 347.137 | 256176 | C18 H21 N O6 | 347.1369 | 0.47      | C18 H21 N O6 | C18 H21 N O6 |

| Compound Label      | m/z      | RT    | Algorithm       | Mass    |
|---------------------|----------|-------|-----------------|---------|
| Cpd 1: C18 H21 N O6 | 348.1445 | 0.116 | Find By Formula | 347.137 |

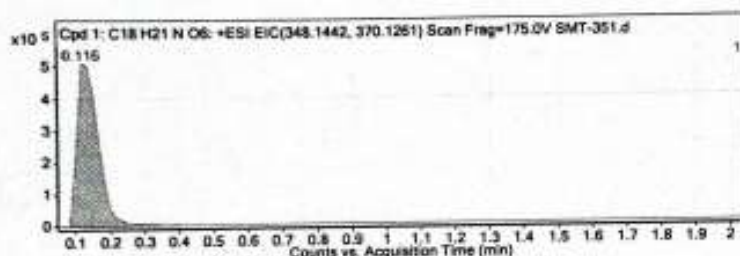

### MS Spectrum

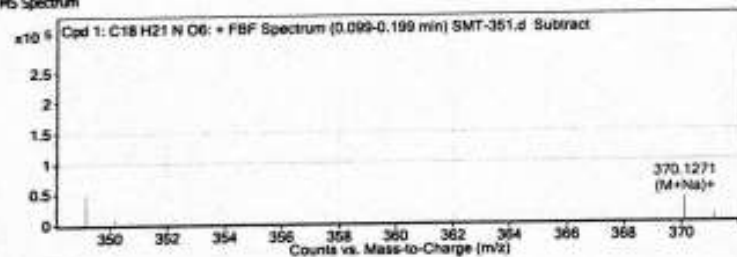

### MS Zoomed Spectrum

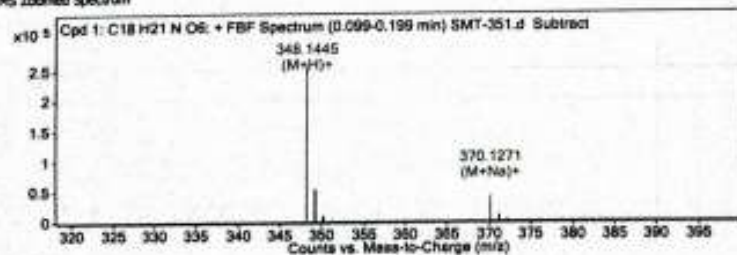

### MS Spectrum Peak List

| m/z      | z | Abund     | Formula     | Ion     |
|----------|---|-----------|-------------|---------|
| 348.1445 | 1 | 256176.03 | C18H22NO6   | (M+H)+  |
| 349.1477 | 1 | 50212.76  | C18H22NO6   | (M+H)+  |
| 350.1501 | 1 | 8033.46   | C18H22NO6   | (M+H)+  |
| 351.1503 | 1 | 1313.11   | C18H22NO6   | (M+H)+  |
| 370.1271 | 1 | 38554.06  | C18H21NNaO6 | (M+Na)+ |
| 371.1217 | 1 | 9704.82   | C18H21NNaO6 | (M+Na)+ |
| 372.129  | 1 | 3353.55   | C18H21NNaO6 | (M+Na)+ |

--- End Of Report ---

<sup>1</sup>H NMR spectrum of 5a (400 MHz, CDCl<sub>3</sub>)

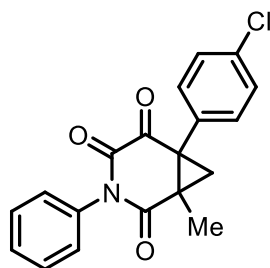

6-(4-chlorophenyl)-1-methyl-3-phenyl-3-azabicyclo[4.1.0]heptane-2,4,5-trione

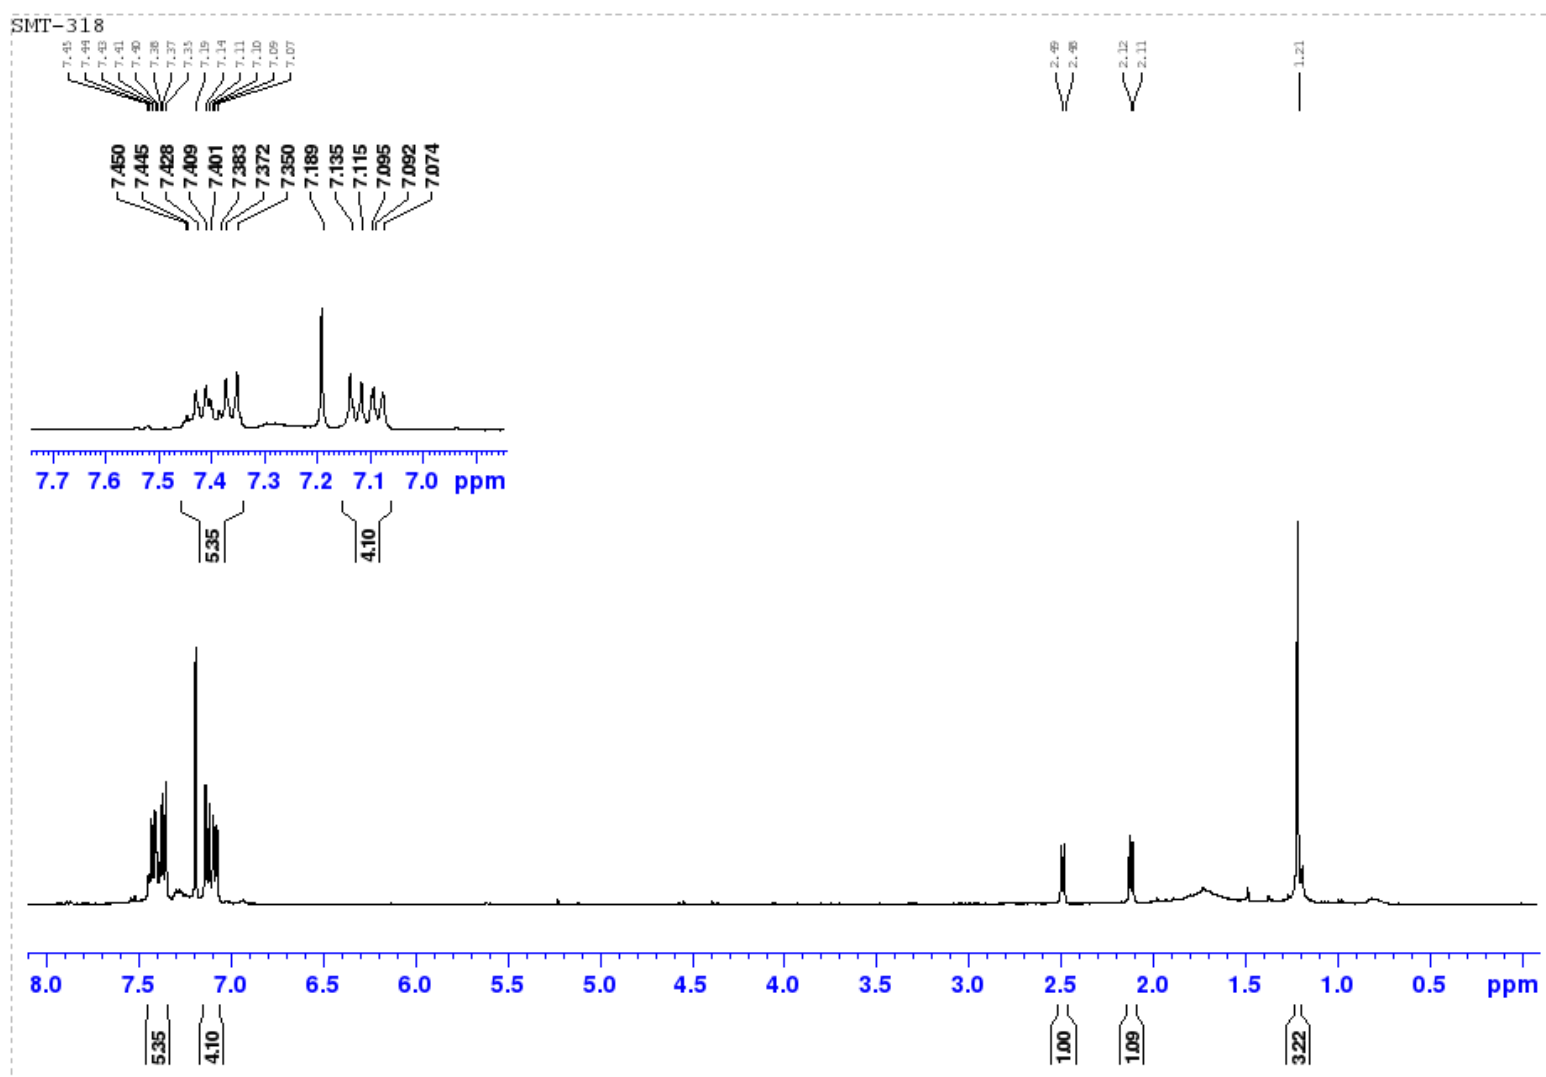



<sup>13</sup>C NMR spectrum of 5a (100 MHz, CDCl<sub>3</sub>)



6-(4-chlorophenyl)-1-methyl-3-phenyl-3-azabicyclo[4.1.0]heptane-2,4,5-trione

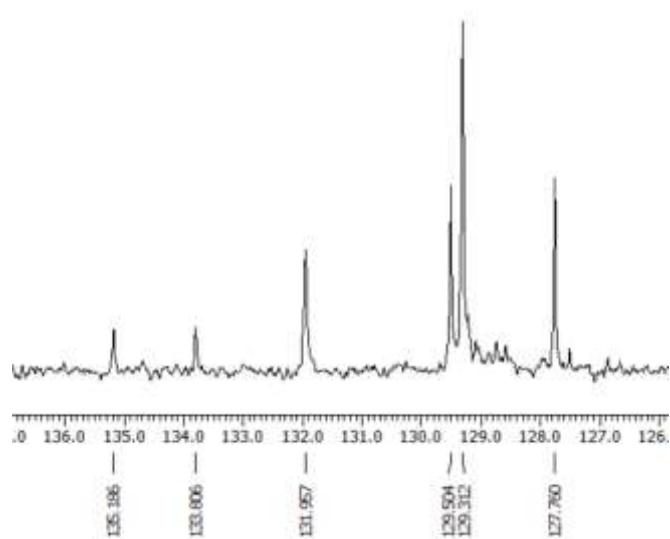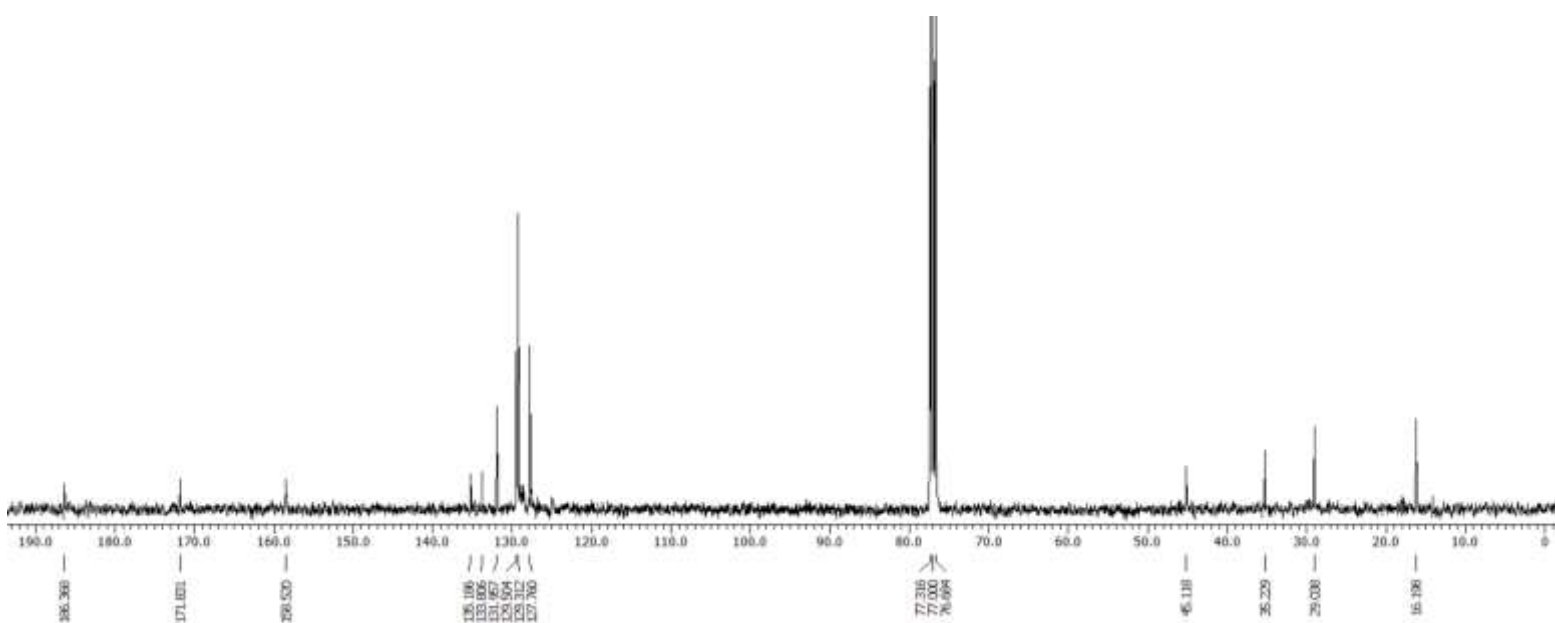

# HRMS spectrum of 5a

## Qualitative Compound Report

|                        |              |               |                     |
|------------------------|--------------|---------------|---------------------|
| Data File              | SMT-318.d    | Sample Name   | SMT_318             |
| Sample Type            | Sample       | Position      | #1-B1               |
| Instrument Name        | Instrument 1 | User Name     |                     |
| Acq Method             | MS Scan.m    | Acquired Time | 11-09-2023 13:36:47 |
| IRM Calibration Status |              | DA Method     | Default.m           |
| Comment                |              |               |                     |

|                |                             |   |
|----------------|-----------------------------|---|
| Sample Group   | Info.                       | 1 |
| Acquisition SW | 6700 series TOF/MS00 series |   |
| Version        | Q-TOF B.05.01 (85125)       |   |

### Compound Table

| Compound Label         | RT    | Mass     | Abund | Formula         | Tgt Mass | Q1F (ppm) | MFG Formula     | DB Formula      |
|------------------------|-------|----------|-------|-----------------|----------|-----------|-----------------|-----------------|
| Cpd 1: C19 H14 Cl N O3 | 0.117 | 339.0694 | 21820 | C19 H14 Cl N O3 | 339.0662 | 5.48      | C19 H14 Cl N O3 | C19 H14 Cl N O3 |

| Compound Label         | m/z      | RT    | Algorithm       | Mass     |
|------------------------|----------|-------|-----------------|----------|
| Cpd 1: C19 H14 Cl N O3 | 340.0758 | 0.117 | Find by Formula | 339.0694 |

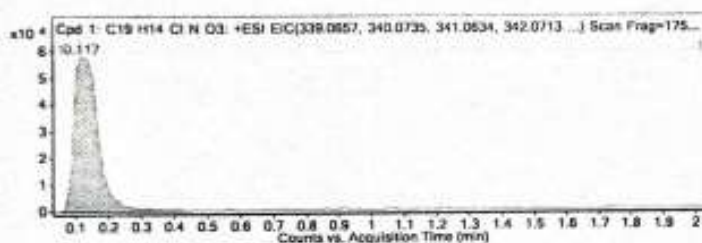

### MS Spectrum

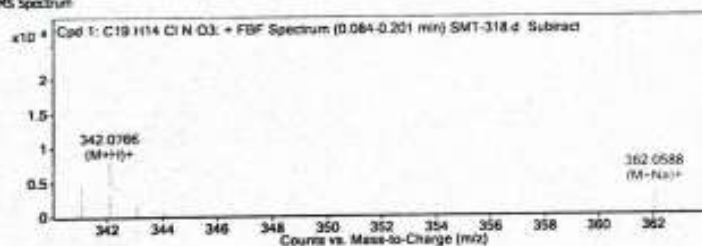

### MS Zoomed Spectrum

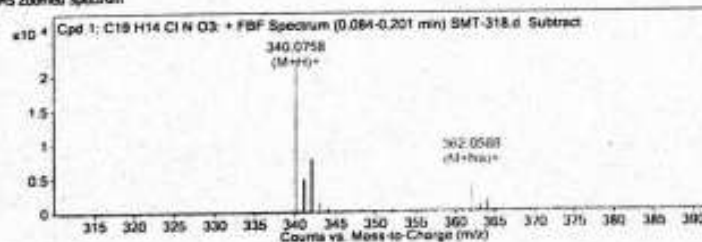

### MS Spectrum Peak List

| m/z      | z | Abund    | Formula       | Ion                 |
|----------|---|----------|---------------|---------------------|
| 340.0758 | 1 | 21820.17 | C19H15ClNO3   | [M+H] <sup>+</sup>  |
| 341.0793 | 1 | 4239.5   | C19H15ClNO3   | [M+H] <sup>+</sup>  |
| 342.0766 | 1 | 7910.84  | C19H15ClNO3   | [M+H] <sup>+</sup>  |
| 343.0786 | 1 | 1786.13  | C19H15ClNO3   | [M+H] <sup>+</sup>  |
| 344.082  | 1 | 620.25   | C19H15ClNO3   | [M+H] <sup>+</sup>  |
| 362.0588 | 1 | 3979.56  | C19H14ClNNaO3 | [M+Na] <sup>+</sup> |
| 363.0627 | 1 | 965.11   | C19H14ClNNaO3 | [M+Na] <sup>+</sup> |
| 364.0576 | 1 | 1360.5   | C19H14ClNNaO3 | [M+Na] <sup>+</sup> |

--- End Of Report ---

**<sup>1</sup>H NMR spectrum of 5b (400 MHz, CDCl<sub>3</sub>)**

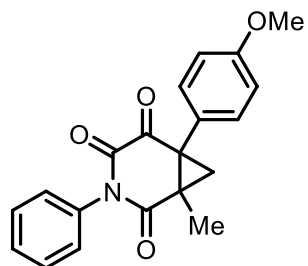

6-(4-methoxyphenyl)-1-methyl-3-phenyl-3-azabicyclo[4.1.0]heptane-2,4,5-trione

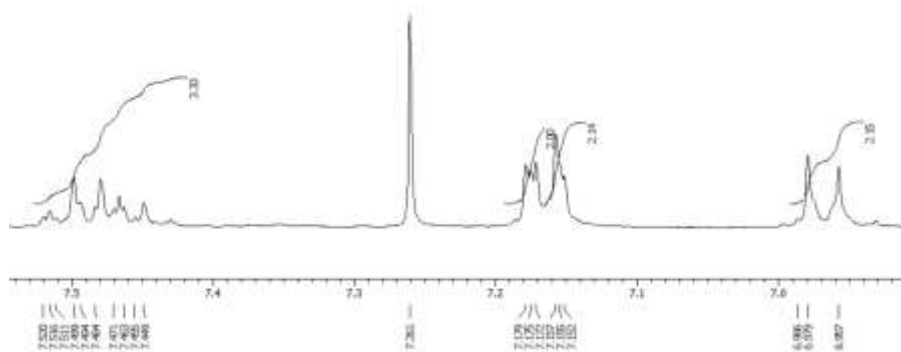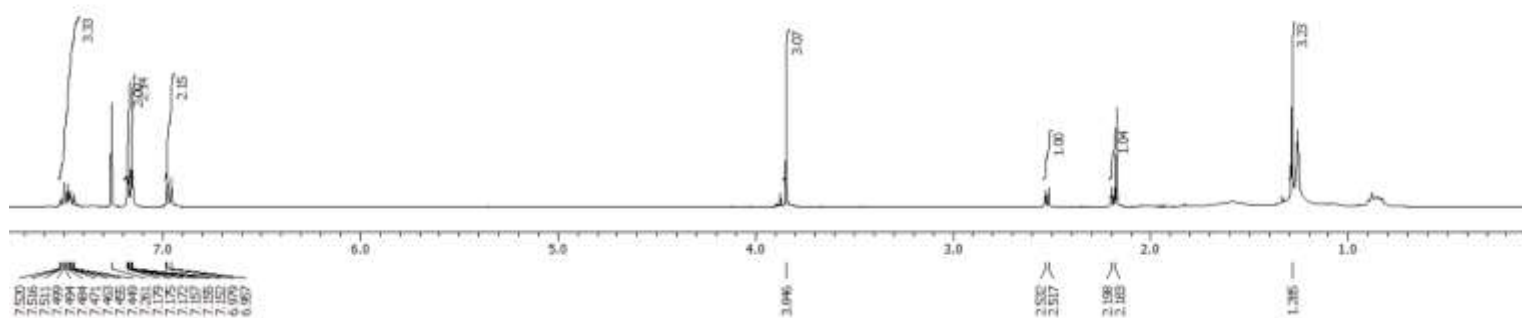

<sup>13</sup>C NMR spectrum of 5b (100 MHz, CDCl<sub>3</sub>)

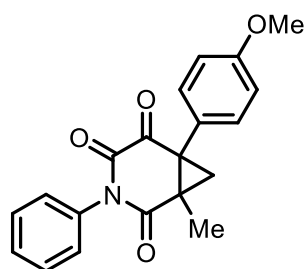

6-(4-methoxyphenyl)-1-methyl-3-phenyl-3-azabicyclo[4.1.0]heptane-2,4,5-trione

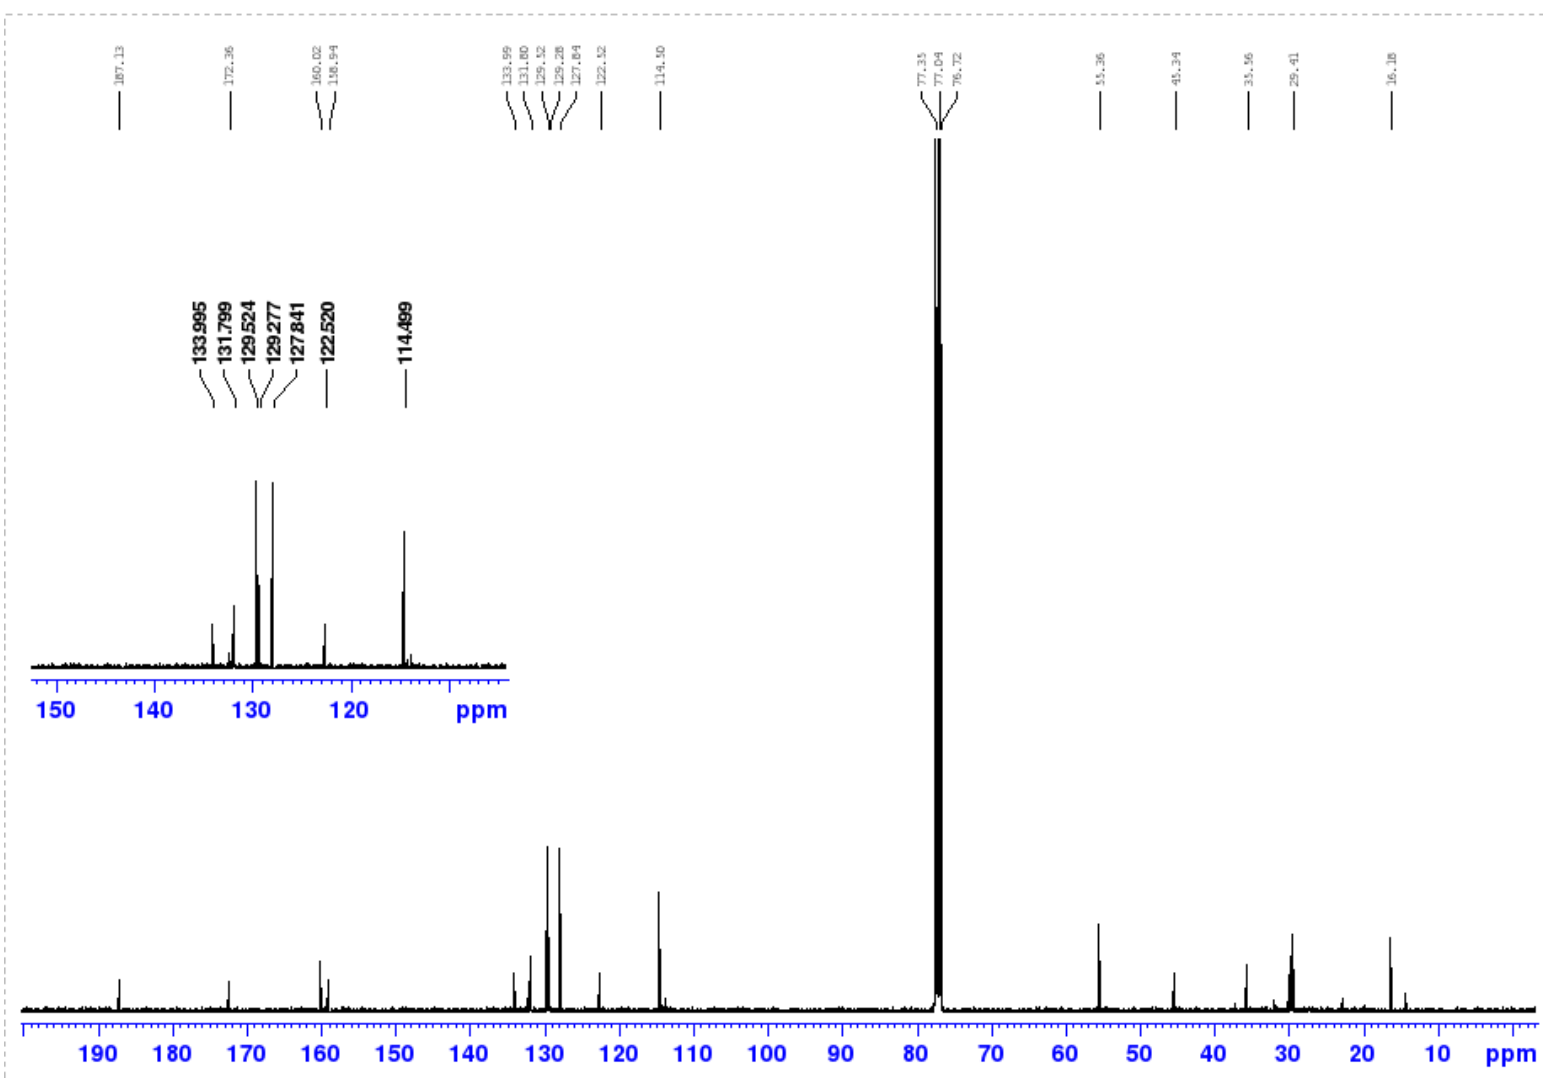

# HRMS spectrum of 5b

|                    |                 |                               |         |                        |                                 |
|--------------------|-----------------|-------------------------------|---------|------------------------|---------------------------------|
| <b>Sample Name</b> | SMT 325         | <b>Position</b>               | P1-A1   | <b>Instrument Name</b> | BIOQTOF                         |
| <b>User Name</b>   | SYSTEM (SYSTEM) | <b>Inj Vol</b>                | 1       | <b>InjPosition</b>     |                                 |
| <b>Sample Type</b> | Sample          | <b>IRM Calibration Status</b> | Success | <b>Data Filename</b>   | SMT 325.d                       |
| <b>ACQ Method</b>  | Pos_100ACN.m    | <b>Comment</b>                |         | <b>Acquired Time</b>   | 27-04-2024 10:53:36 (UTC+05:30) |

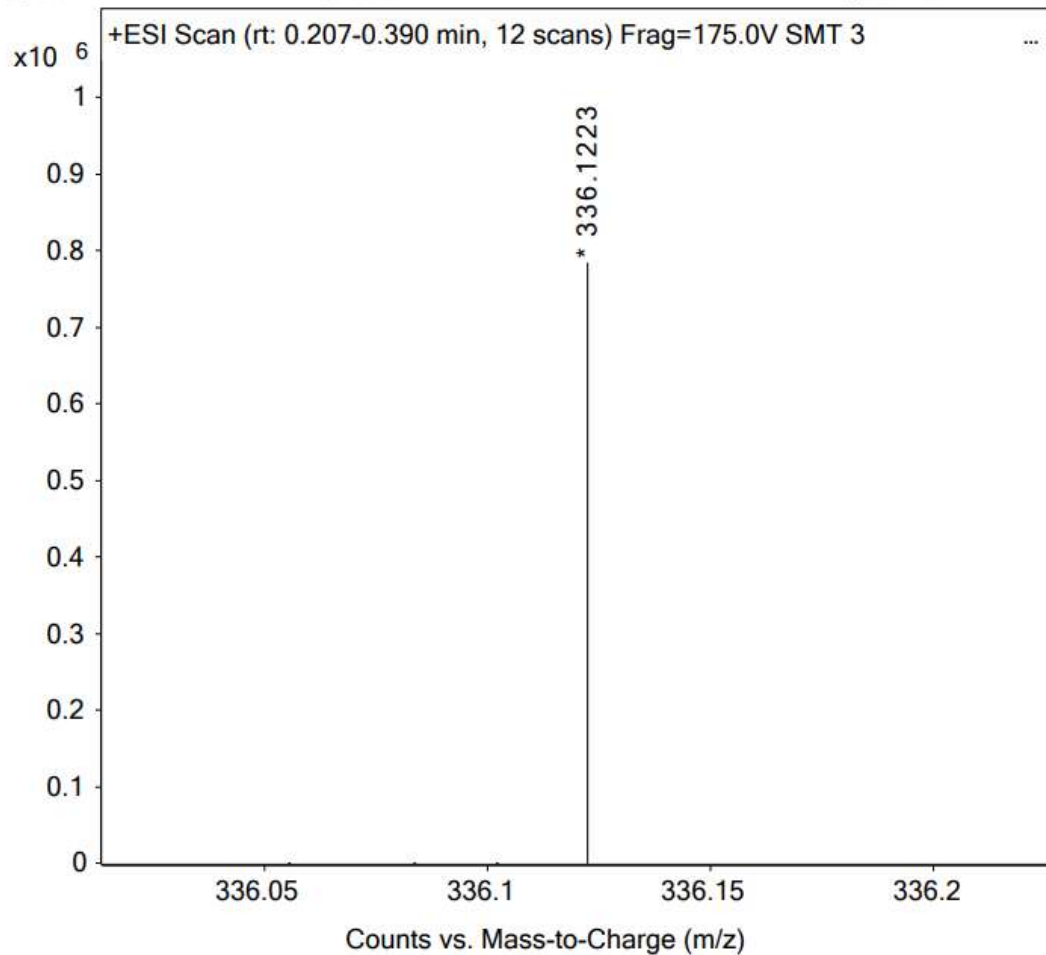

<sup>1</sup>H NMR spectrum of 5c (400 MHz, CDCl<sub>3</sub>)

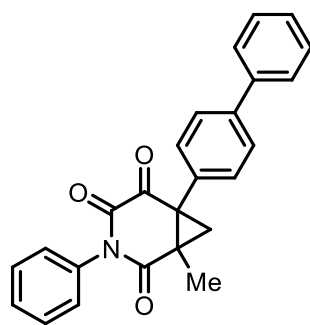

6-([1,1'-biphenyl]-4-yl)-1-methyl-3-phenyl-3-azabicyclo[4.1.0]heptane-2,4,5-trione

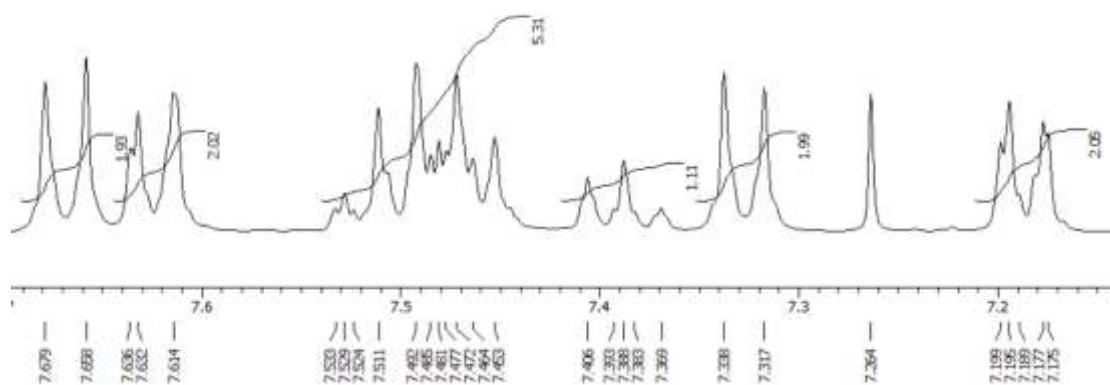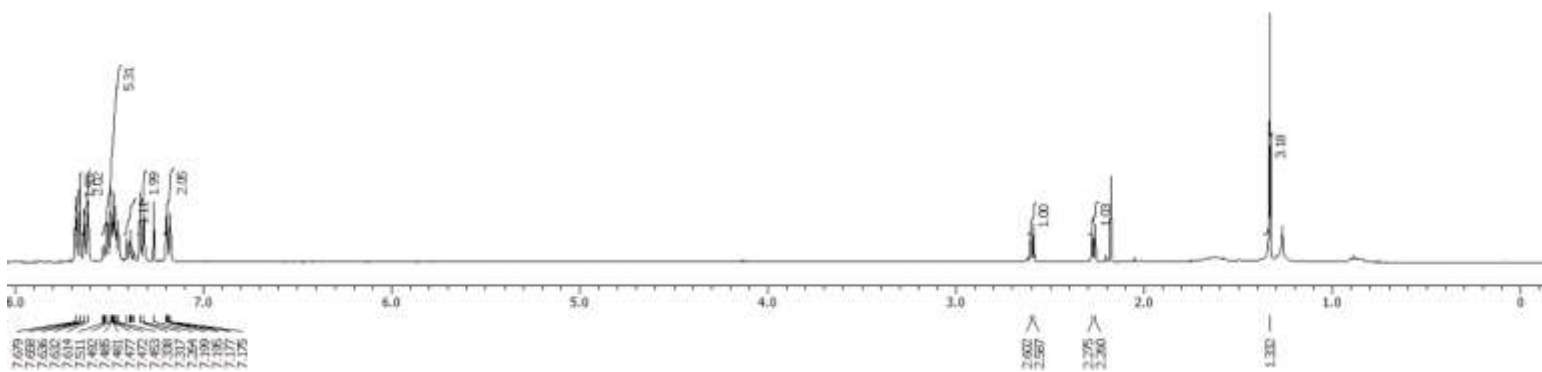

<sup>13</sup>C NMR spectrum of 5c (100 MHz, CDCl<sub>3</sub>)

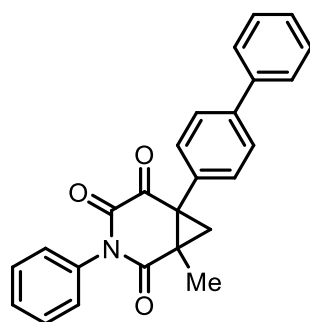

6-([1,1'-biphenyl]-4-yl)-1-methyl-3-phenyl-3-azabicyclo[4.1.0]heptane-2,4,5-trione

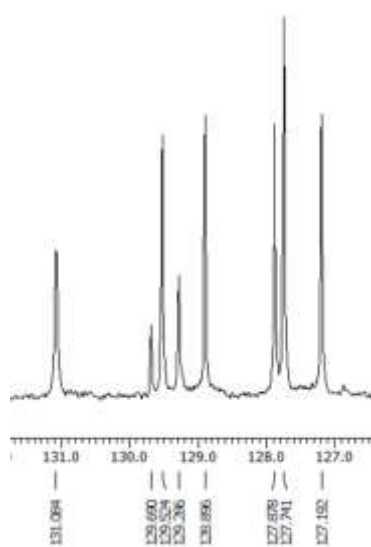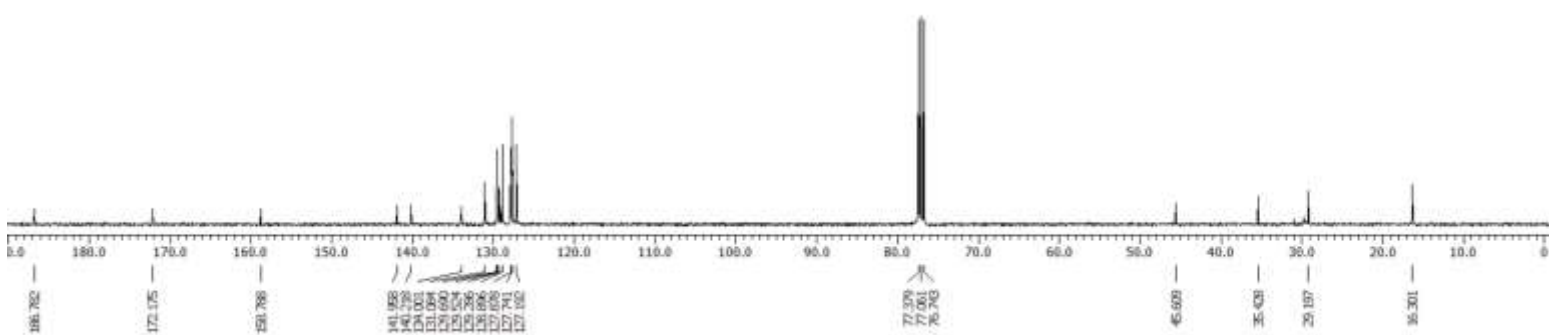

# HRMS spectrum of 5c

|                    |                 |                               |         |                        |                                 |
|--------------------|-----------------|-------------------------------|---------|------------------------|---------------------------------|
| <b>Sample Name</b> | SMT 324         | <b>Position</b>               | P1-A9   | <b>Instrument Name</b> | BIOQTOF                         |
| <b>User Name</b>   | SYSTEM (SYSTEM) | <b>Inj Vol</b>                | 1       | <b>InjPosition</b>     |                                 |
| <b>Sample Type</b> | Sample          | <b>IRM Calibration Status</b> | Success | <b>Data Filename</b>   | SMT 324.d                       |
| <b>ACQ Method</b>  | Pos_100ACN.m    | <b>Comment</b>                |         | <b>Acquired Time</b>   | 27-04-2024 12:11:44 (UTC+05:30) |

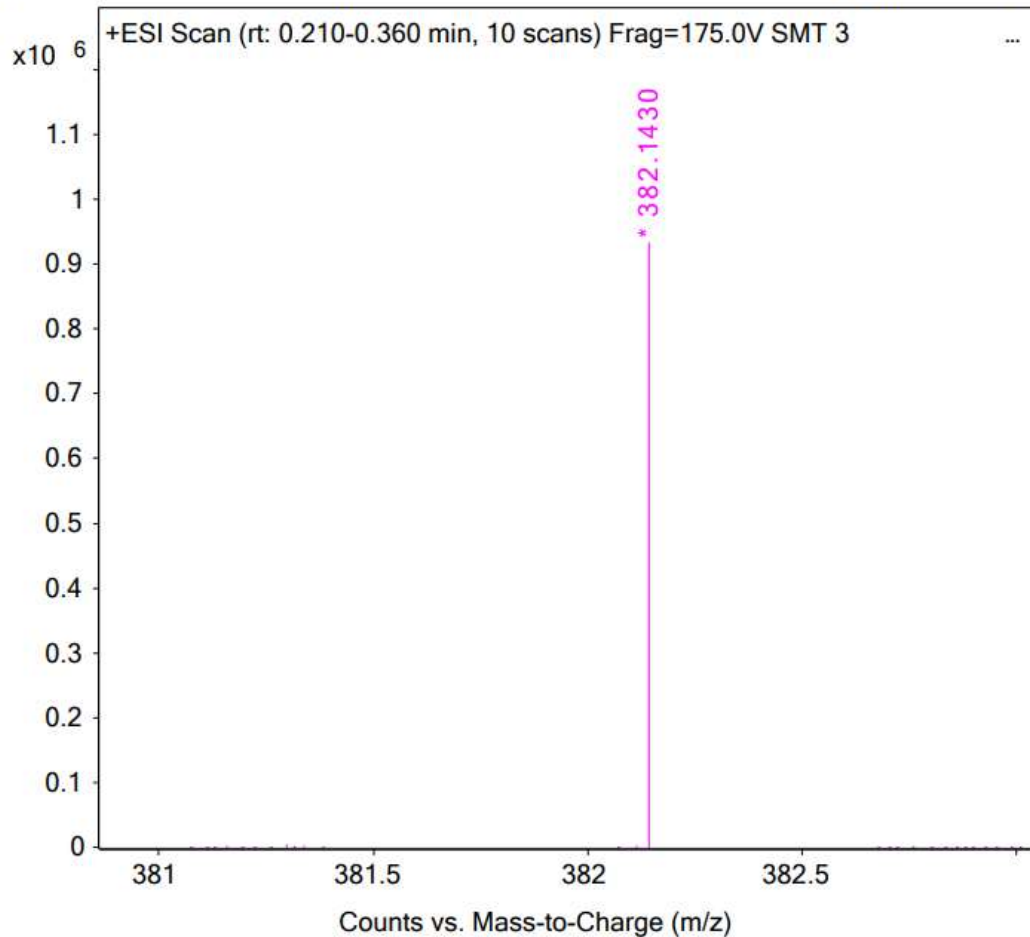



<sup>1</sup>H NMR spectrum of 6 (400 MHz, CDCl<sub>3</sub>)

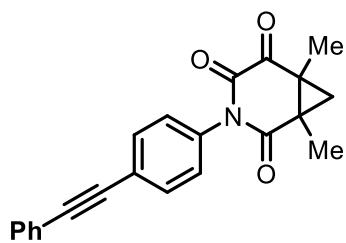

1,6-dimethyl-3-(4-(phenylethynyl)phenyl)-3-azabicyclo[4.1.0]heptane-2,4,5-trione

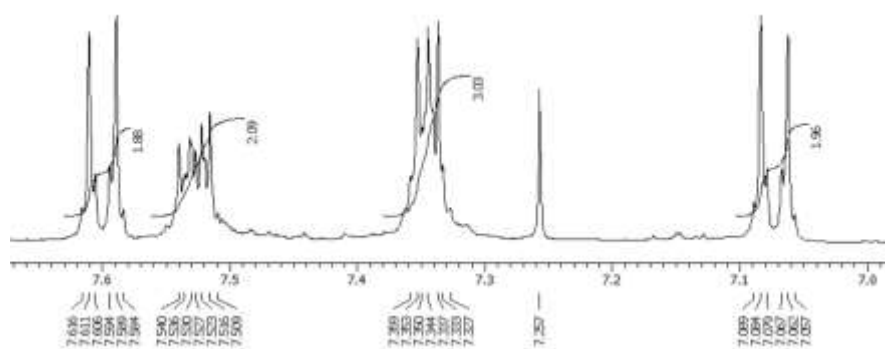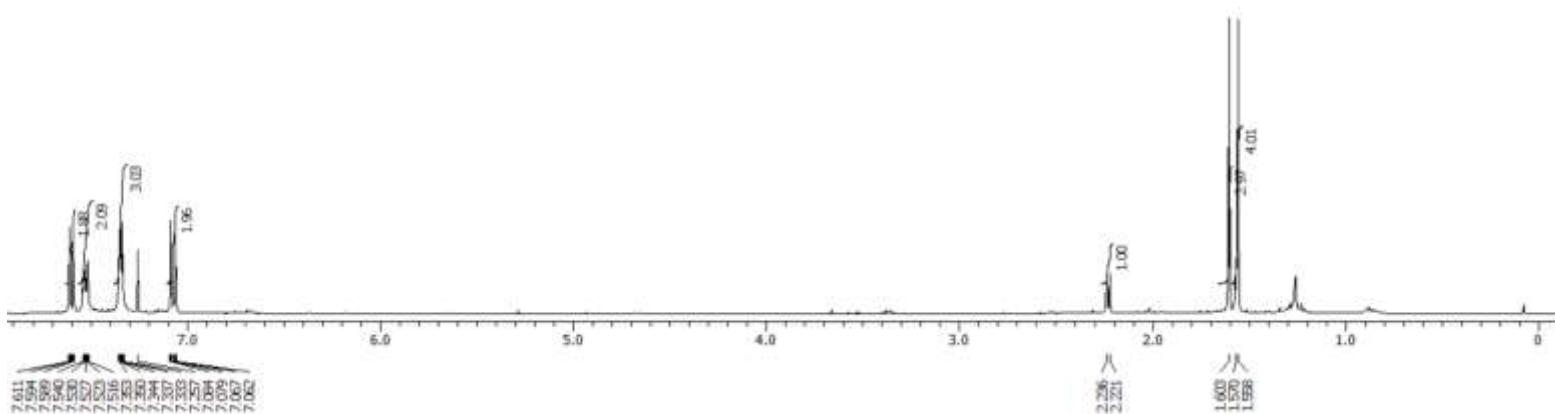

<sup>13</sup>C NMR spectrum of 6 (100 MHz, CDCl<sub>3</sub>)

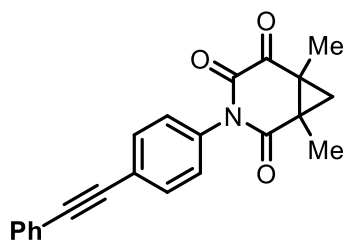

1,6-dimethyl-3-(4-(phenylethynyl)phenyl)-3-azabicyclo[4.1.0]heptane-2,4,5-trione

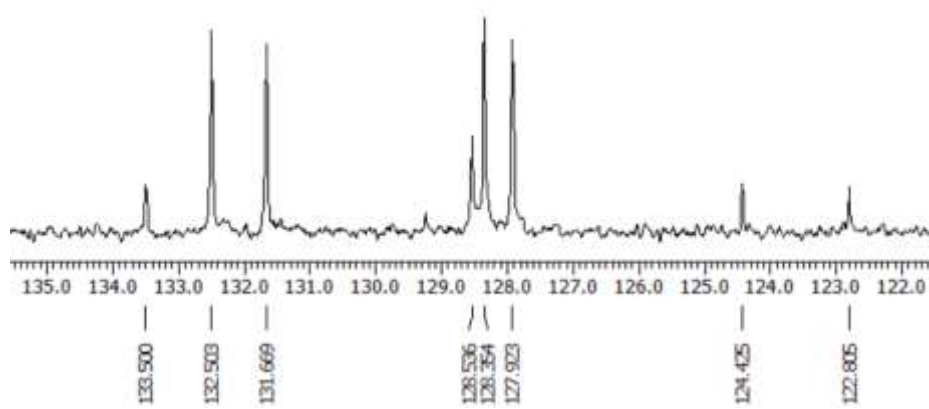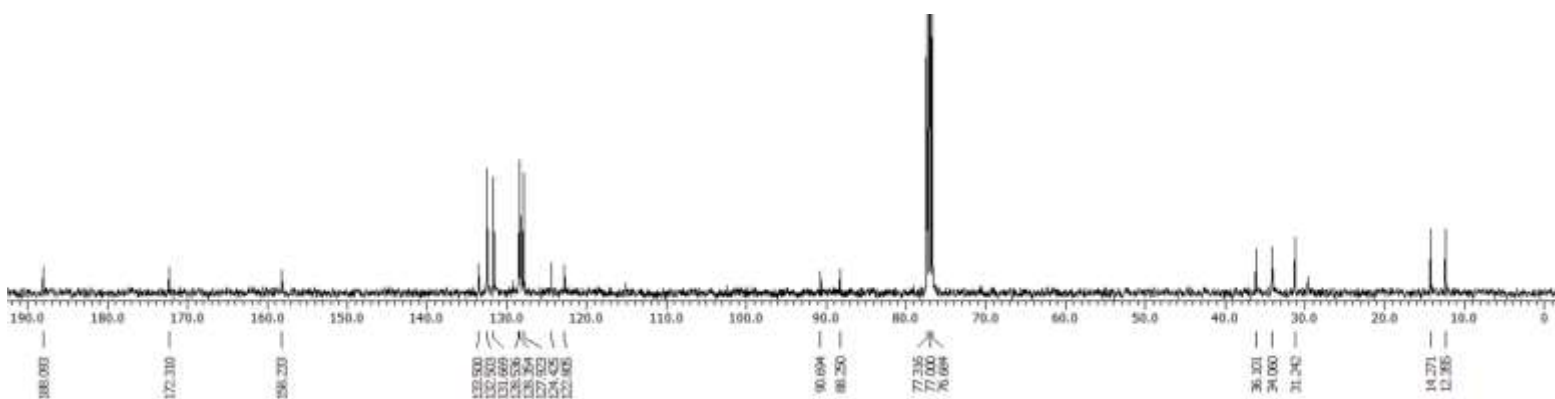

# HRMS spectrum of 6

|                    |                 |                               |         |                        |                                 |
|--------------------|-----------------|-------------------------------|---------|------------------------|---------------------------------|
| <b>Sample Name</b> | SMT 481         | <b>Position</b>               | P1-C6   | <b>Instrument Name</b> | BIOQTOF                         |
| <b>User Name</b>   | SYSTEM (SYSTEM) | <b>Inj Vol</b>                | 1       | <b>InjPosition</b>     |                                 |
| <b>Sample Type</b> | Sample          | <b>IRM Calibration Status</b> | Success | <b>Data Filename</b>   | SMT 481.d                       |
| <b>ACQ Method</b>  | Pos_100ACN.m    | <b>Comment</b>                |         | <b>Acquired Time</b>   | 27-04-2024 13:25:12 (UTC+05:30) |

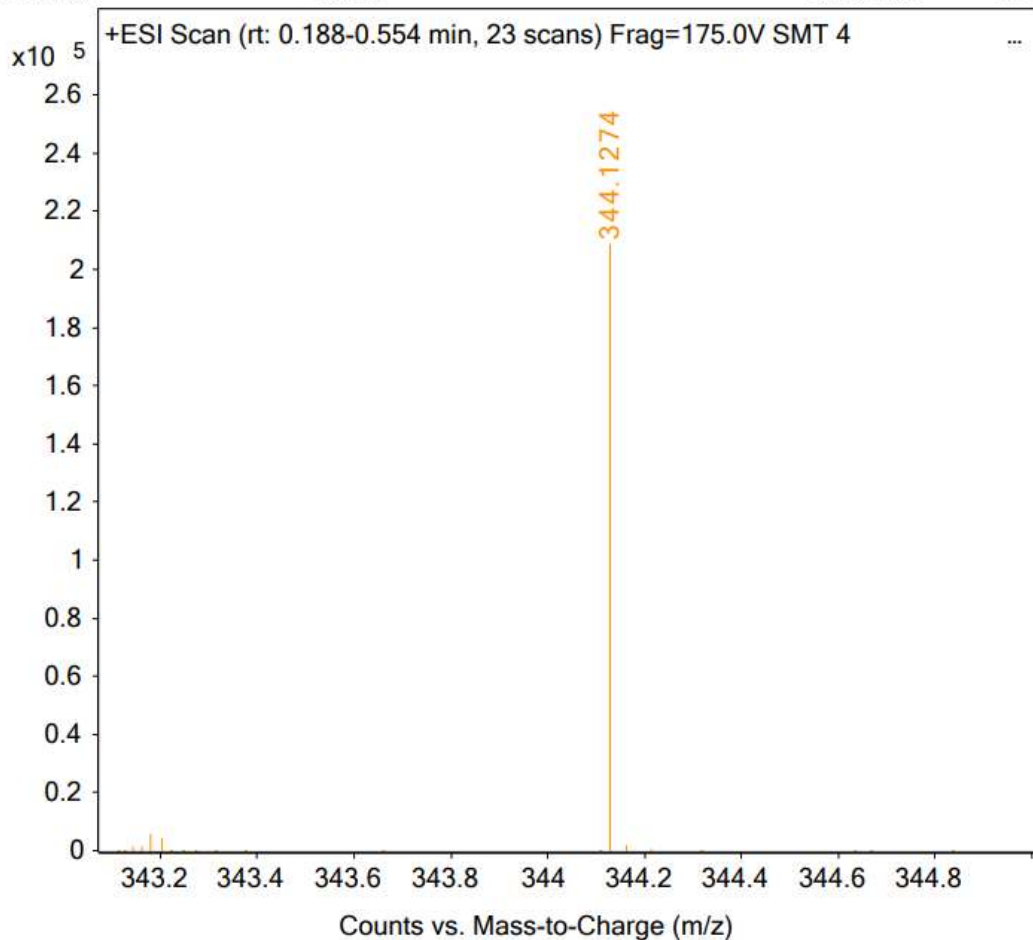

<sup>1</sup>H NMR spectrum of 7 (400 MHz, CDCl<sub>3</sub>)

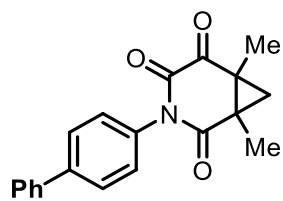

3-([1,1'-biphenyl]-4-yl)-1,6-dimethyl-3-azabicyclo[4.1.0]heptane-2,4,5-trione

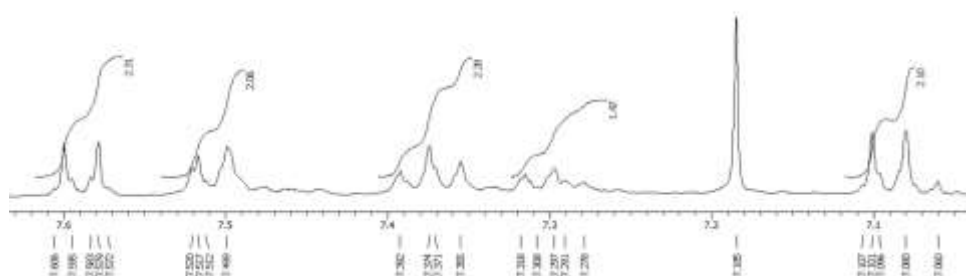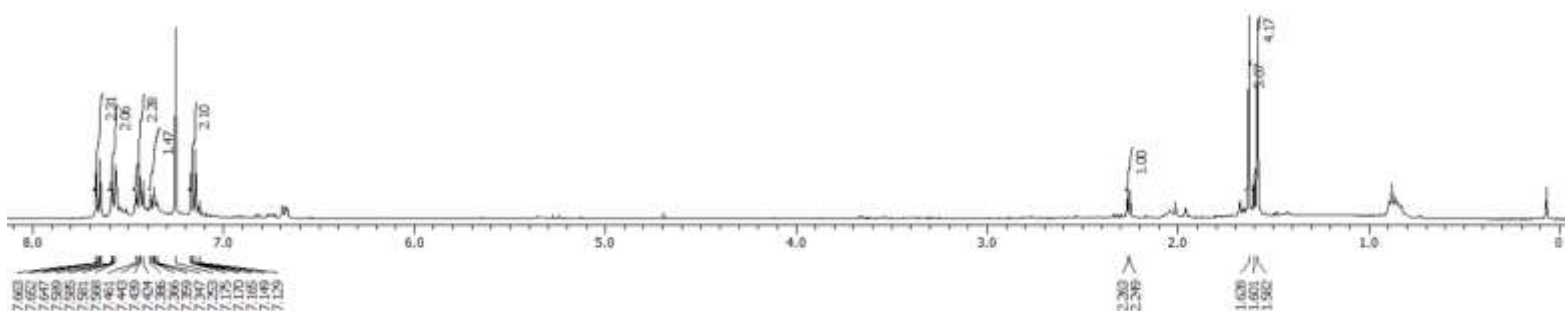

<sup>13</sup>C NMR spectrum of 7 (100 MHz, CDCl<sub>3</sub>)

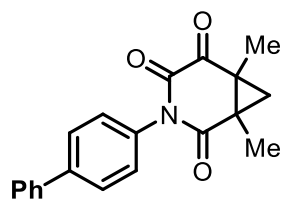

3-([1,1'-biphenyl]-4-yl)-1,6-dimethyl-3-azabicyclo[4.1.0]heptane-2,4,5-trione

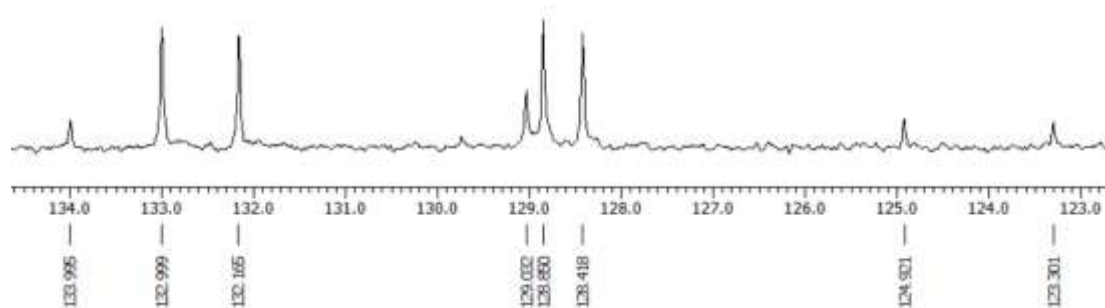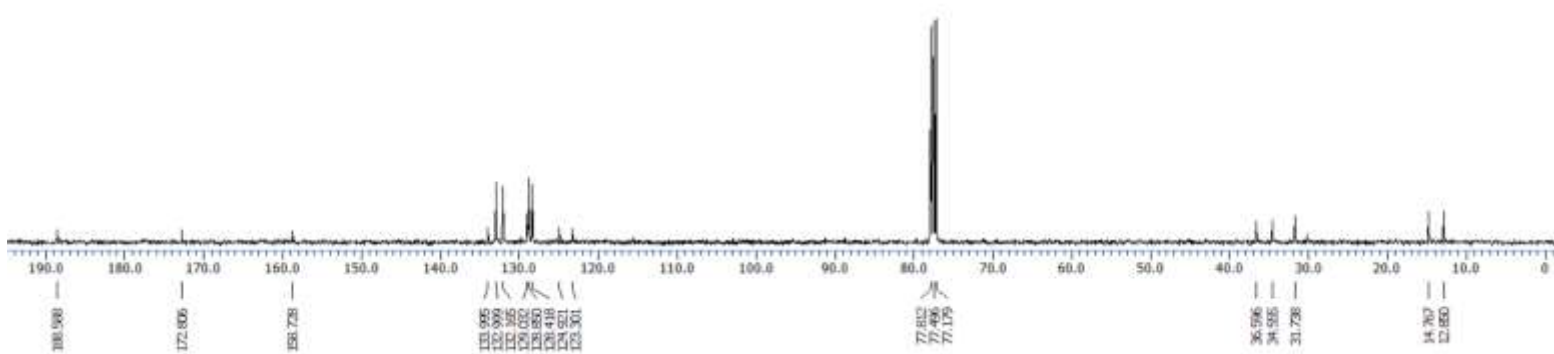

# HRMS spectrum of 7

|                    |                 |                               |         |                        |                                 |
|--------------------|-----------------|-------------------------------|---------|------------------------|---------------------------------|
| <b>Sample Name</b> | SMT 482         | <b>Position</b>               | P1-A8   | <b>Instrument Name</b> | BIOQTOF                         |
| <b>User Name</b>   | SYSTEM (SYSTEM) | <b>Inj Vol</b>                | 1       | <b>InjPosition</b>     |                                 |
| <b>Sample Type</b> | Sample          | <b>IRM Calibration Status</b> | Success | <b>Data Filename</b>   | SMT 482.d                       |
| <b>ACQ Method</b>  | Pos_100ACN.m    | <b>Comment</b>                |         | <b>Acquired Time</b>   | 27-04-2024 12:07:53 (UTC+05:30) |

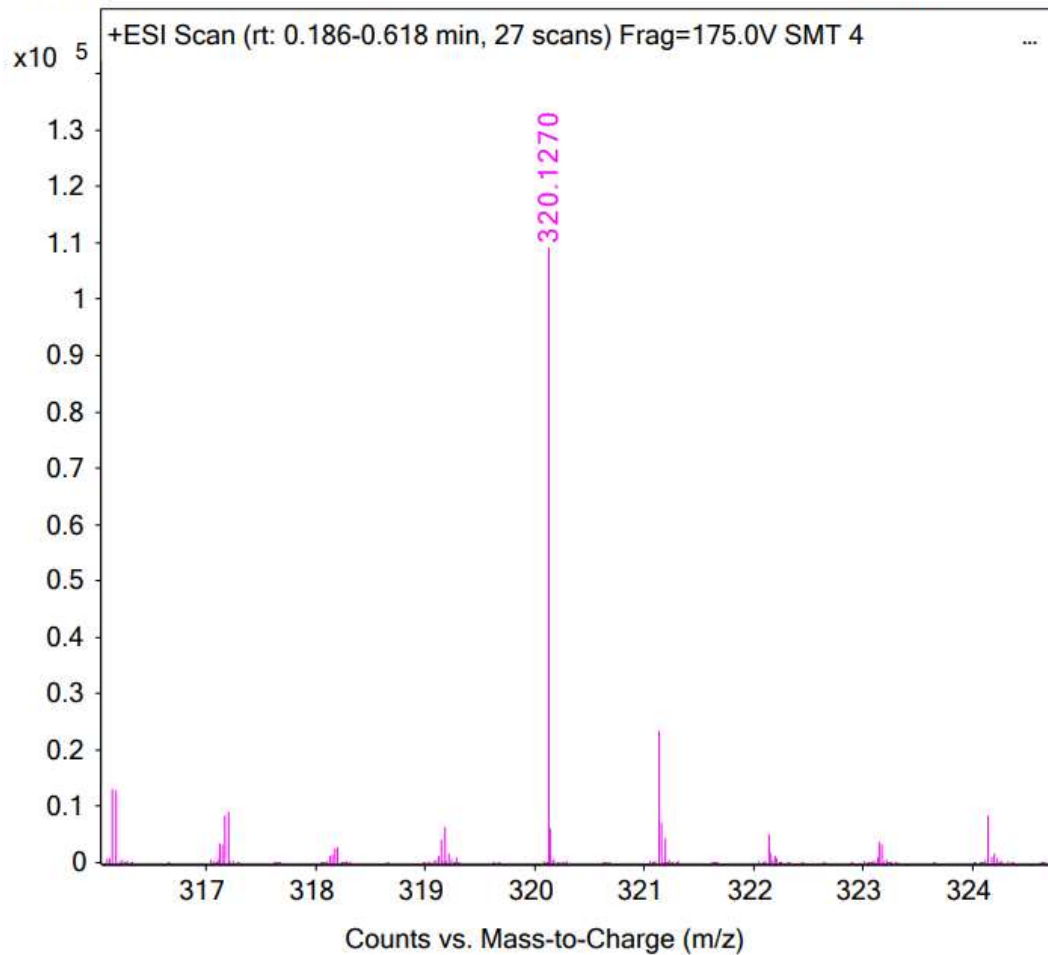

(10) Isotopic study:

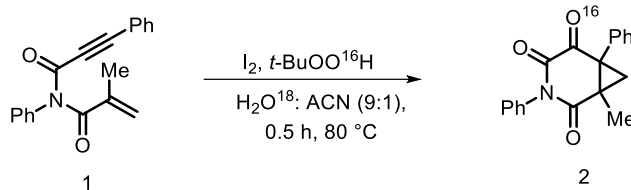

| Molecular Formula                                               | Molecular weight | Molecular mass found |
|-----------------------------------------------------------------|------------------|----------------------|
| C <sub>19</sub> H <sub>15</sub> NO <sub>2</sub> O <sup>16</sup> | 305.1078         | 306.1136             |

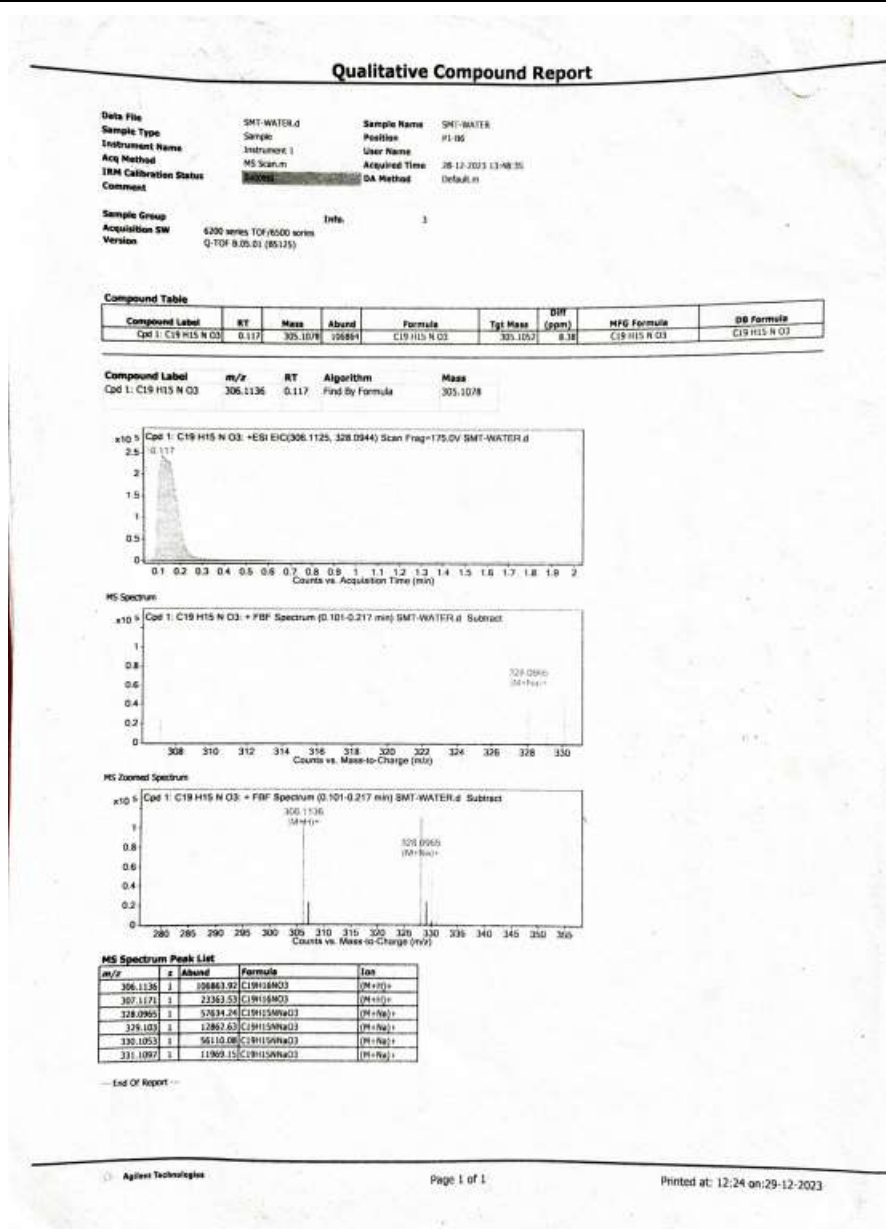

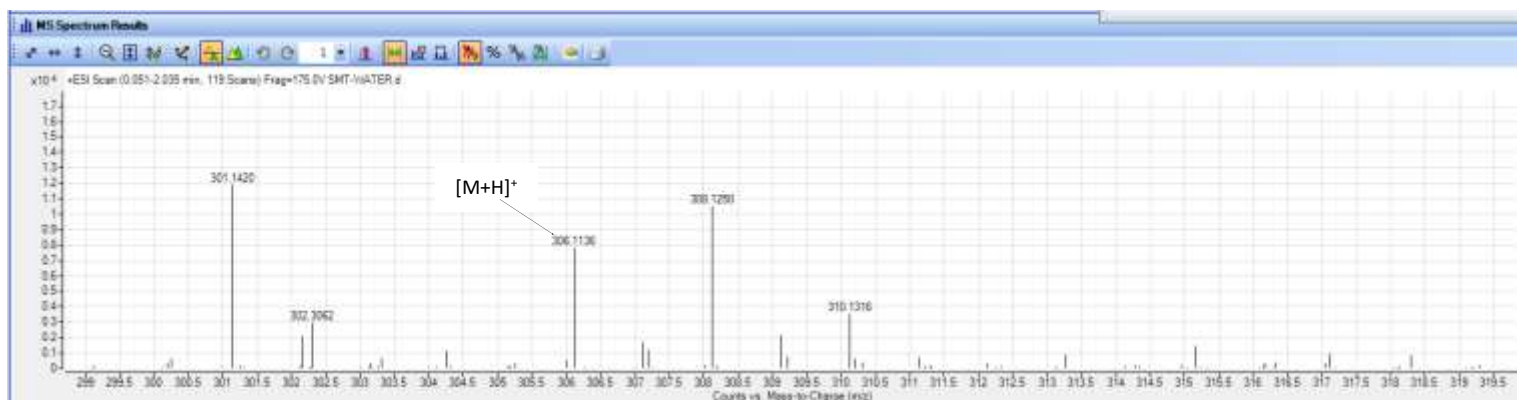

Figure S5: Mass spectrum



**(11) Intermediate Adduct Data:**

1) HRMS Data of TEMPO adduct:

| Structure of TEMPO Adduct                                                         | Molecular Formula    | Molecular weight | Molecular mass found |
|-----------------------------------------------------------------------------------|----------------------|------------------|----------------------|
| 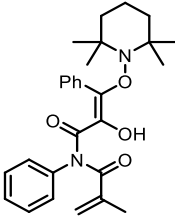 | $C_{28}H_{34}N_2O_4$ | 462.2526         | 463.2597             |

**Qualitative Compound Report**

**Data File:** SMT-TEMPO.d      **Sample Name:** SMT-TEMPO  
**Sample Type:** Sample      **Position:** P1-04  
**Instrument Name:** Instrument 1      **User Name:**  
**Acq Method:** MS Scan.m      **Acquired Time:** 28-12-2013 13:40:55  
**TEM Calibration Status:** Success      **DA Method:** Default.m  
**Comment:**

**Sample Group:** Info: 1  
**Acquisition SW:** 6300 series TQF/6500 series  
**Version:** Q-TQF 8.05.01 (05/175)

**Compound Table**

| Compound Label       | RT    | Mass     | Abund  | Formula       | Tgt Mass | DV (ppm) | MFG Formula   | DB Formula    |
|----------------------|-------|----------|--------|---------------|----------|----------|---------------|---------------|
| Cpd 1: C28 H34 N2 O4 | 0.117 | 462.2526 | 103329 | C28 H34 N2 O4 | 462.2519 | 1.64     | C28 H34 N2 O4 | C28 H34 N2 O4 |

| Compound Label       | m/z      | RT    | Algorithm       | Mass     |
|----------------------|----------|-------|-----------------|----------|
| Cpd 1: C28 H34 N2 O4 | 463.2597 | 0.117 | Find by Formula | 462.2526 |

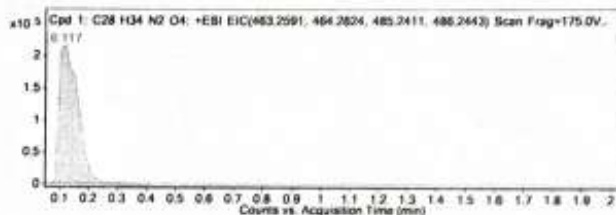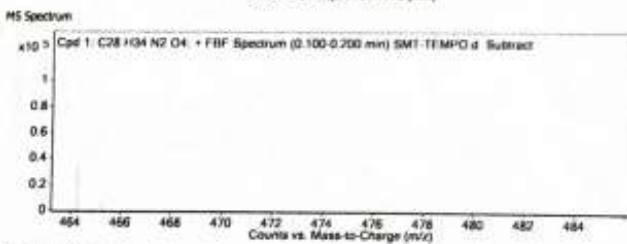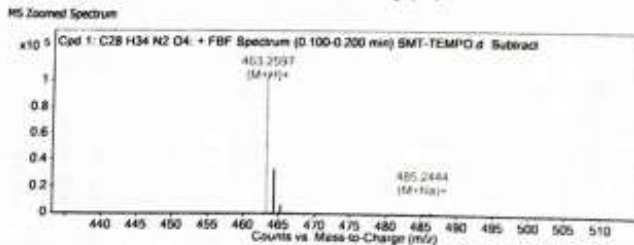

**MS Spectrum Peak List**

| m/z      | z | Abund     | Formula      | Ion     |
|----------|---|-----------|--------------|---------|
| 463.2597 | 1 | 103329.14 | C28H34N2O4   | (M+H)+  |
| 464.2631 | 1 | 32288.25  | C28H35N2O4   | (M+H)+  |
| 465.2691 | 1 | 5909.46   | C28H35N2O4   | (M+H)+  |
| 466.2668 | 1 | 642.05    | C28H35N2O4   | (M+H)+  |
| 485.2444 | 1 | 1680.43   | C28H34N2NaO4 | (M+Na)+ |
| 486.2526 | 1 | 49.89     | C28H34N2NaO4 | (M+Na)+ |

— End Of Report —

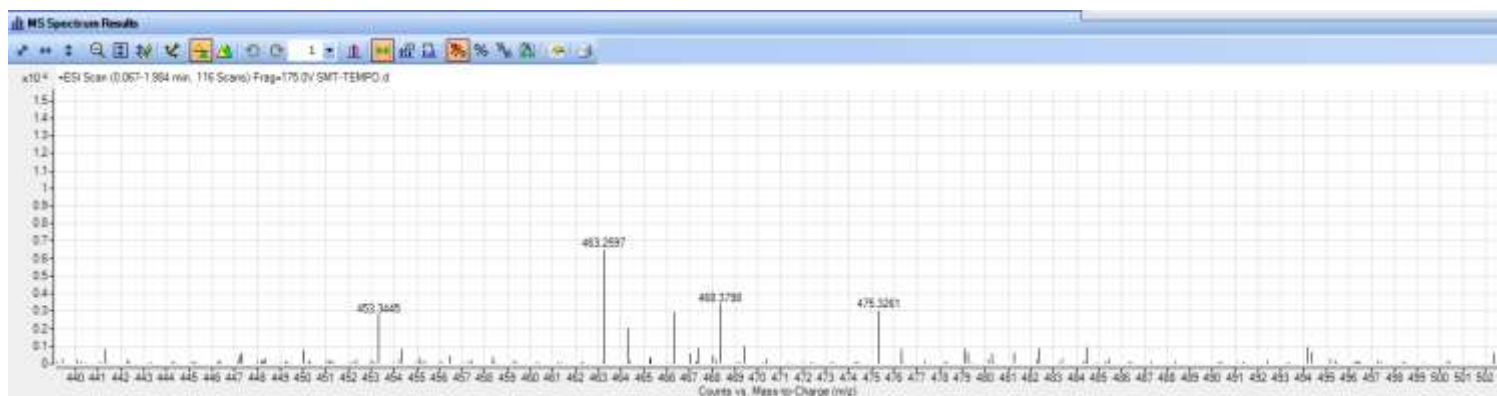

**Figure S6:** Mass spectrum of TEMPO adduct

2) HRMS Data of BHT adduct:

| Compound                                                                          | Molecular Formula                               | Molecular weight | Molecular mass found |
|-----------------------------------------------------------------------------------|-------------------------------------------------|------------------|----------------------|
| 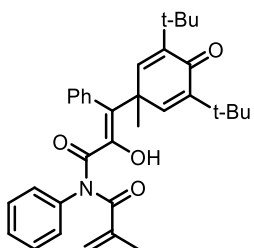 | C <sub>34</sub> H <sub>39</sub> NO <sub>4</sub> | 525.2902         | 526.2976             |

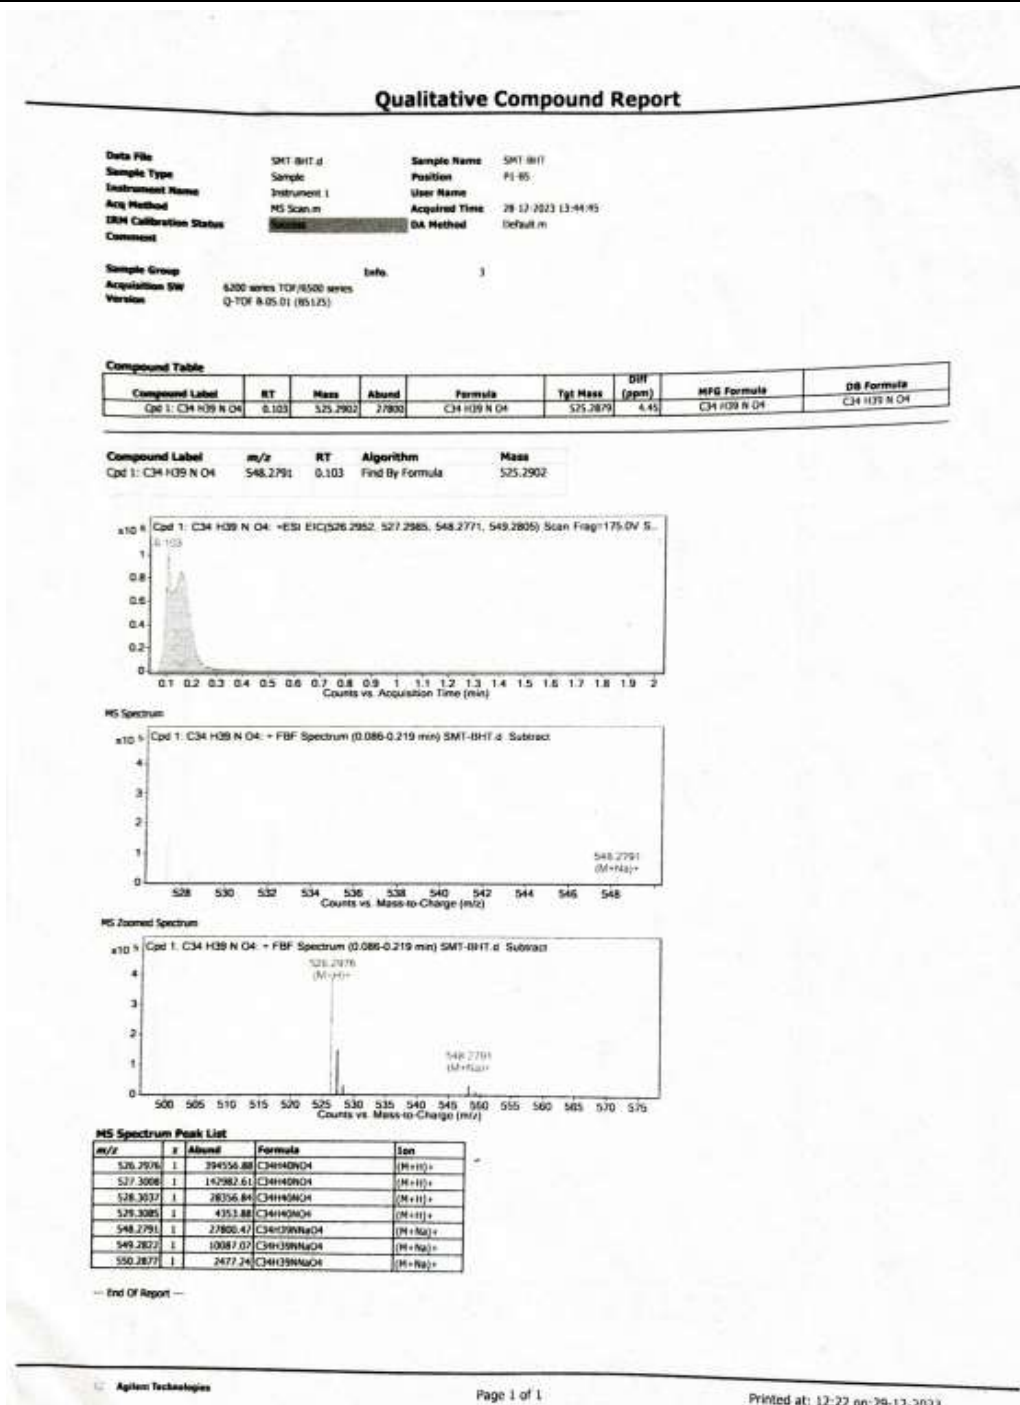

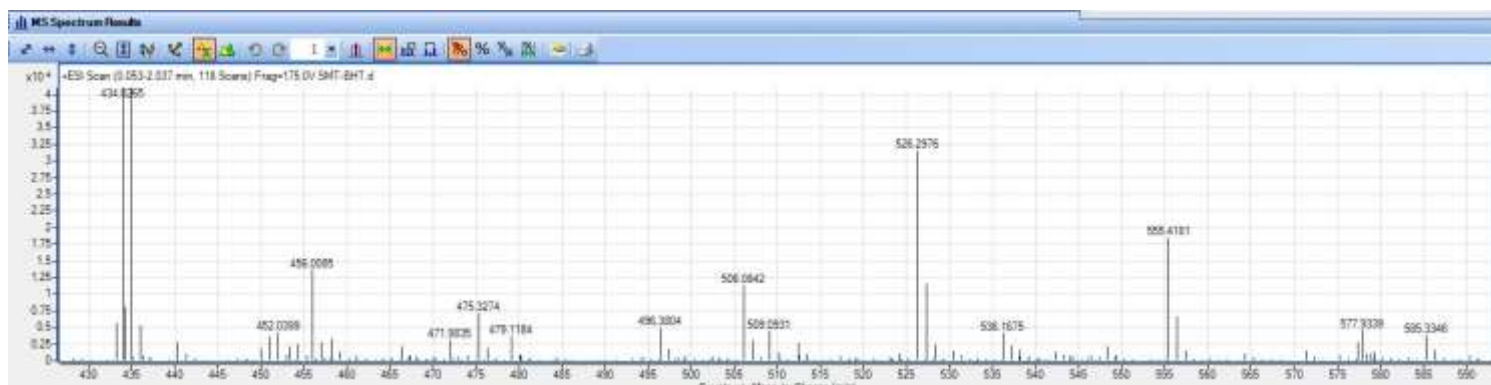

**Figure S7:** Mass Spectrum of BHT adduct

**(12) References:**

- 1) K. L. Vikse, M. P. Woods and J. S. McIndoe, *Organometallics*, 2010, **29**, 6615.
- 2) Gu, Y.; Dai, L.; Mao, K.; Zhang, J.; Wang, C.; Zhao, L.; Rong, L.; *Org. Lett.*, 2020, **22**, 2956.
